# Supplementary material for: Multiscale mutation clustering algorithm identifies pan-cancer mutational clusters associated with pathway-level changes in gene expression
Source: PLoS Comput Biol. 2017 Feb 7;13(2):e1005347. doi: 10.1371/journal.pcbi.1005347 (PMC5321471; doi:10.1371/journal.pcbi.1005347)
Supplement: S1 Tables — This document includes all the supplemental tables referenced in the manuscript as separate excel tabs. Detailed descriptions of these tables can be found in S1 Table Descriptions document. The tables are also downloadable as individual TSV’s from the M2C website, http://m2c.systemsbiology.net/. (XLSX) [file pcbi.1005347.s006.xlsx]

## Sheet: T1_TCGA_Tumor_Type_Identifiers
Cancer	TCGA Cancer Acronym
Lung squamous cell carcinoma	LUSC
Uterine Carcinosarcoma	UCS
Prostate adenocarcinoma	PRAD
Kidney renal papillary cell carcinoma	KIRP
Rectum adenocarcinoma	READ
Liver hepatocellular carcinoma	LIHC
Lung adenocarcinoma	LUAD
Bladder Urothelial Carcinoma	BLCA
Cervical squamous cell carcinoma and endocervical adenocarcinoma	CESC
Kidney Chromophobe	KICH
Stomach adenocarcinoma	STAD
Colon adenocarcinoma	COAD
Head and Neck squamous cell carcinoma	HNSC
Glioblastoma multiforme	GBM
Ovarian serous cystadenocarcinoma	OV
Kidney renal clear cell carcinoma	KIRC
Breast invasive carcinoma	BRCA
Uterine Corpus Endometrial Carcinoma	UCEC
Adrenocortical carcinoma	ACC
Brain Lower Grade Glioma	LGG
Skin Cutaneous Melanoma	SKCM
Thyroid carcinoma	THCA
Acute Myeloid Leukemia	LAML

## Sheet: T2_cluster_defs_and_scores
gene	cluster	cluster score	number of mutationts	weight	gaussian mean	gaussian standard deviation	overlapping domains
TAP1	383, 657	11.6524	20	0.363727	526.44	149.811
STK11	227, 336	15.6331	16	0.311774	257.224	53.9221	49-309, Pkinase;
STK11	168, 221	28.2074	18	0.255226	194.415	29.9969	49-309, Pkinase;
MEN1	83, 160	27.5193	15	0.21093	122.967	27.5957	1-615, Menin;
IL6ST	439, 627	22.5841	21	0.25512	555.435	104.289	518-605, fn3;
IL6ST	66, 256	23.7441	20	0.224343	165.612	83.4812	128-217, IL6Ra-bind;
OR2L8	116, 153	31.5251	25	0.181475	134.96	32.6011
DLG1	6, 173	30.2652	21	0.201135	86.4268	54.2343
DLG1	662, 840	22.9581	16	0.188529	748.105	63.0773	713-891, Guanylate_kin;
SMG7	421, 715	25.1185	22	0.238219	572.705	110.68
SMG7	890, 1040	25.7914	16	0.178996	947.757	69.1511
NAPSA	121, 324	8.03611	24	0.524963	220.64	94.7818	77-401, Asp;
PIK3CA	5, 12	85.6342	17	0.0177694	9.34079	1.95113
PIK3CA	38, 39	83.0118	16	0.0152492	38.3982	2.33009
PIK3CA	81, 93	191.363	45	0.0414513	88.4182	3.55169	31-108, PI3K_p85B;
PIK3CA	104, 111	139.462	33	0.0269747	111.33	4.97232
PIK3CA	115, 118	76.438	22	0.0324904	109.768	7.99735
PIK3CA	339, 350	249.09	51	0.0528509	344.941	2.19899
PIK3CA	357, 378	61.4363	17	0.0127115	367.056	6.79238	350-485, PI3K_C2;
PIK3CA	451, 456	125.42	23	0.0242888	453.034	1.32955
PIK3CA	539, 547	1743.83	340	0.353481	544.131	1.54068
PIK3CA	725, 726	108.631	16	0.0156384	725.94	0.398942
PIK3CA	1004, 1029	73.8023	22	0.015211	1013.44	9.55048
PIK3CA	1043, 1049	1258.04	236	0.248413	1046.63	1.38925
SLC28A1	103, 249	21.3897	23	0.241872	176.171	90.7239
SLC28A1	387, 542	17.3995	22	0.293342	463.918	104.06	366-591, Nucleos_tra2_C;
SEMG1	39, 158	18.447	17	0.256228	102.333	44.6346	1-371, Semenogelin;
SEMG1	316, 417	21.852	17	0.295813	364.06	35.0714	283-462, Semenogelin;
RPTN	489, 591	38.6696	26	0.198078	514.91	57.9928
RPTN	368, 468	45.7391	25	0.199574	422.111	37.5485
RPTN	112, 244	29.9235	22	0.131587	179.335	60.7523
IRX4	176, 230	32.8477	16	0.306223	207.172	22.2348
IRX3	158, 273	23.6792	19	0.34785	215.449	41.5962
ZMYM2	550, 700	25.3766	15	0.109104	633.804	89.201
ZMYM2	20, 160	33.6814	16	0.108968	90.0839	42.9665
ZMYM2	758, 951	11.1142	15	0.289929	855.634	253.028
ZMYM2	997, 1124	35.6866	16	0.133156	1063.26	46.2918
ZMYM2	1158, 1348	34.168	20	0.128436	1247.82	69.9151
SLITRK5	23, 95	37.9822	17	0.0600732	64.541	30.6819
SLITRK5	272, 338	24.3147	15	0.101543	306.136	71.7711
SLITRK5	468, 549	39.4032	20	0.0818518	510.08	46.2486	505-564, F4PID8.1;
SLITRK5	579, 625	46.8261	18	0.0764121	605.301	24.0027
SLITRK5	632, 692	51.3832	23	0.100933	650.021	34.6091
SLITRK5	900, 958	42.7454	17	0.0675936	922.414	20.9951
ARID1A	457, 515	45.0666	15	0.0368643	503.399	37.6435
ARID1A	521, 576	53.9377	19	0.0459584	530.779	48.1842
ARID1A	664, 711	57.0982	17	0.0370194	690.107	27.6778
ARID1A	727, 802	68.9535	22	0.0394203	753.123	28.4448
ARID1A	992, 1049	61.0813	19	0.0354012	1013.61	30.3222	1015-1104, ARID_domain;
ARID1A	1118, 1172	57.3648	16	0.0308378	1145.21	16.6772
ARID1A	1221, 1287	44.4192	15	0.0349429	1258.44	39.9782
ARID1A	1324, 1342	75.8428	16	0.038987	1332.94	5.58889
ARID1A	1424, 1528	46.5764	18	0.0267209	1473.78	59.154
ARID1A	1708, 1734	76.0782	17	0.0413524	1723.63	6.50456
ARID1A	1900, 1961	55.7165	16	0.0308853	1930.8	15.9893
ARID1A	1989, 1994	84.3594	15	0.0388691	1989.39	2.8222
ARID1A	2011, 2052	57.1131	15	0.0341289	2038.41	15.1354	1975-2231, B6IDZ6.1;
ARID1A	2104, 2198	72.0192	25	0.0445613	2153.47	37.3927	1975-2231, B6IDZ6.1;
ARID1A	2232, 2275	65.6867	18	0.0388633	2249.77	15.6265
DIAPH3	629, 735	22.8655	15	0.132217	694.571	95.8755	636-1009, FH2;
DIAPH3	997, 1153	39.0567	22	0.139891	1070.1	56.9539
DIAPH3	200, 350	33.3639	19	0.106452	266.947	63.5826	113-297, Drf_GBD;
NUP93	262, 486	24.0148	24	0.264617	369.713	98.5467	202-804, Nic96;
NUP93	14, 88	35.7741	18	0.25087	42.8482	29.2723
MUC6	916, 1060	58.6026	22	0.0741922	985.965	43.4019	868-1019, VWD;
MUC6	1272, 1386	36.2937	16	0.0600842	1363.43	86.0117
MUC6	1417, 1544	56.4799	20	0.0572774	1480.14	42.9925
MUC6	1676, 1737	74.9217	21	0.0783943	1710.94	20.4395
MUC6	1835, 1927	55.2586	23	0.0691717	1901.93	80.7905
MUC6	1972, 2021	72.015	22	0.0719606	2006.74	31.0244
MUC6	2196, 2290	47.4809	15	0.050982	2247.81	29.0744
MUC17	46, 133	66.4992	18	0.0212601	84.0323	37.0642
MUC17	214, 328	59.0682	18	0.0186047	271.319	56.2707
MUC17	451, 535	52.781	15	0.0211367	468.119	43.9369
MUC17	637, 704	75.6646	19	0.0216916	670.093	26.2425
MUC17	918, 956	73.3144	16	0.0208577	938.005	11.7625
MUC17	975, 1029	72.3717	18	0.0241936	1002.09	25.3189
MUC17	1319, 1376	83.4121	21	0.0183565	1346.11	27.4439
MUC17	1394, 1466	64.6699	20	0.0242939	1393.68	50.6017
MUC17	1589, 1673	75.4465	21	0.0198226	1623.02	40.5137
MUC17	1696, 1808	71.3461	25	0.0253733	1741.15	97.7395
MUC17	1993, 2112	57.8953	17	0.0180312	2056.56	49.5088
MUC17	2136, 2226	88.3682	24	0.0214433	2188.42	31.6554
MUC17	2268, 2342	75.3482	19	0.0168901	2300.42	24.2687
MUC17	2368, 2498	75.3632	25	0.0234535	2417.1	74.853
MUC17	2558, 2669	60.9438	21	0.0233438	2642.26	92.1764
MUC17	2718, 2790	49.0659	15	0.0219884	2783.74	54.7815
MUC17	2814, 2885	66.8595	20	0.0225987	2824.67	53.9191
MUC17	3043, 3155	86.7734	27	0.0249518	3107.03	61.4137
MUC17	3256, 3329	78.2904	21	0.020023	3301.88	32.4426
MUC17	3490, 3599	69.7637	20	0.0209054	3541.04	35.2759
MUC17	3644, 3815	128.314	47	0.0365859	3736.38	103.415
MUC17	4340, 4420	75.9835	20	0.0176995	4376.5	25.3823
GATA3	108, 158	28.9971	17	0.0697458	137.894	27.7794
GATA3	325, 334	65.4091	18	0.125249	330.902	3.65352
GATA3	390, 421	94.4875	35	0.21795	406.961	7.81951
GATA3	429, 443	64.8325	21	0.135442	436.554	5.00264
CCND1	240, 293	20.9403	16	0.371788	268.246	22.9161	155-283, Cyclin_C;
TEX2	768, 943	22.9427	17	0.163163	865.451	91.8806	825-914, DUF2404;
TEX2	10, 142	40.7812	21	0.204242	81.5756	48.6614
PTEN	116, 146	393.052	136	0.254188	130.225	6.70842
PTEN	0, 10	66.3023	19	0.0286878	5.3288	3.30066
PTEN	20, 31	61.2489	18	0.0264274	24.899	4.38087
PTEN	39, 52	70.6118	22	0.0281193	44.6499	4.9762
PTEN	61, 76	82.7141	26	0.0394361	68.3041	4.74262	45-171, E9BQZ4.1;
PTEN	86, 93	53.7277	21	0.028588	89.7683	12.1671
PTEN	162, 178	106.006	35	0.0458971	170.981	5.21626
PTEN	229, 239	136.483	35	0.0650921	233.65	2.52472
PTEN	245, 252	54.68	19	0.0295725	244.855	8.00165
PTEN	290, 301	42.2279	17	0.0223039	299.55	13.0477
PTEN	307, 328	118.756	44	0.0656186	320.25	9.15919
PTEN	333, 343	44.1936	18	0.0341052	329.29	9.58752
LACTB	5, 5	102.569	18	0.394878	5.09183	0.725567
LACTB	363, 502	16.0707	16	0.279985	410.214	64.0655	277-538, Beta-lactamase;
CTBP2	198, 273	22.8113	16	0.234655	242.796	28.9954	36-358, 2-Hacid_dh;
CTCF	256, 314	31.6238	15	0.0912379	294.558	28.2056
CTCF	320, 418	57.0923	30	0.176705	359.745	35.4185	365-389, H9KID0.1;
CTCF	482, 651	59.5385	47	0.252414	563.25	55.306	555-578, E9IDP3.1;
ACVR1B	216, 305	8.20869	15	0.296698	265.462	112.002	207-494, Pkinase;
ACVR1B	316, 412	18.4859	21	0.23146	359.729	74.807	207-494, Pkinase;
CDKN1A	32, 69	19.5342	17	0.308836	45.5318	16.1707	19-69, CDI;
MLL3	56, 144	56.6594	16	0.0176404	94.9127	39.5767
MLL3	293, 329	100.663	22	0.0272158	311.994	16.1357	252-331, F4WID5.1;
MLL3	338, 380	140.753	31	0.0538248	361.21	16.0875
MLL3	782, 845	101.383	25	0.0261668	803.577	26.1767
MLL3	885, 1002	59.1692	21	0.0312266	887.455	89.1666
MLL3	1162, 1269	68.8607	20	0.0301289	1211.01	51.0369
MLL3	1684, 1758	67.2023	18	0.0295575	1734.25	39.1697
MLL3	1881, 1977	55.8242	16	0.0225667	1949.23	46.4241
MLL3	1982, 2082	51.7417	15	0.0255967	2016.49	52.584
MLL3	2409, 2524	63.1053	20	0.0242027	2430.25	68.9854
MLL3	3022, 3177	49.255	16	0.0221281	3109.83	73.7684
MLL3	3347, 3524	62.4712	21	0.0305867	3447.64	85.2338
MLL3	3579, 3724	47.0652	16	0.0203706	3648.84	91.7883
MLL3	3788, 3930	48.5217	17	0.0238097	3869.75	104.639
MLL3	4307, 4391	60.9691	18	0.0230274	4360.26	58.4317
MLL3	4565, 4714	55.199	18	0.0254272	4628.58	70.8281	4606-4693, F4WID5.1;
MLL2	255, 415	43.1656	18	0.0482751	347.314	189.929
MLL2	668, 829	92.9528	27	0.0291203	749.254	54.4644
MLL2	1200, 1290	69.3473	18	0.0337453	1234.17	36.3385
MLL2	1589, 1764	54.7466	19	0.0333325	1716.82	106.244
MLL2	1835, 2014	95.6971	29	0.0342025	1916.38	60.6697
MLL2	2311, 2483	90.3143	29	0.0368905	2365.21	73.1574
MLL2	2914, 3103	53.379	17	0.0314593	3023.83	69.5894
MLL2	3536, 3646	55.6938	15	0.0335338	3575.93	39.6659
MLL2	4399, 4583	67.1832	21	0.0325596	4494	56.6671
MLL2	4727, 4915	58.3123	20	0.0248232	4837.47	98.8567
MLL2	4964, 5106	55.7786	17	0.0240929	5049.43	66.9707
MLL2	5125, 5214	65.2408	17	0.0341531	5172.55	40.4797
MLL2	5381, 5466	72.774	19	0.0349178	5438.13	34.5117	5408-5513, E9IDS4.1;
EDC4	130, 286	36.3165	18	0.163538	198.058	55.3795
MLL4	125, 192	53.0247	15	0.0654339	160.817	23.8409
MLL4	262, 618	29.8826	22	0.137701	425.537	253.662
MLL4	1251, 1463	40.0367	20	0.0761141	1346.77	132.113	1337-1396, E9IDS4.1;
MLL4	1530, 1689	33.757	17	0.083177	1662.76	132.147	1608-1686, F4WID5.1;
MLL4	1803, 1891	43.9358	15	0.0658397	1855.5	51.4506
MLL4	2548, 2712	59.1331	23	0.103054	2630.46	48.7717	2586-2691, G4TUE5.1;
GABBR1	269, 408	23.0963	15	0.137151	345.614	71.2753	187-543, ANF_receptor;
GABBR1	29, 115	33.5989	16	0.117756	63.0776	32.2326	34-96, Sushi;
GABBR1	623, 783	27.9088	20	0.169732	704.531	82.7046	601-860, 7tm_3;
PANK2	392, 542	17.74	15	0.323982	463.335	48.8114	212-567, Fumble;
APOB	1030, 1689	37.9747	21	0.219923	1426.18	214.026
APOB	2837, 3297	32.1893	15	0.185474	3116.23	140.55
CSDE1	562, 687	17.8554	17	0.221027	627.606	101.674
CSDE1	715, 784	36.34	17	0.120527	741.277	23.0687
CSDE1	78, 212	26.3697	23	0.219247	147.699	86.3138
NF2	245, 418	10.4318	18	0.341091	325.857	116.66
NF1	53, 216	49.4074	21	0.0459816	144.557	86.6448
NF1	304, 400	51.126	20	0.0454599	380.219	72.9775
NF1	420, 482	62.4154	17	0.042683	458.178	21.6132
NF1	520, 666	50.6285	21	0.0541278	556.603	81.08
NF1	700, 858	53.6952	25	0.0533197	768.154	118.835
NF1	923, 1083	55.0851	22	0.0392093	1012.68	74.2272
NF1	1192, 1276	72.9926	23	0.030969	1239.42	35.9366
NF1	1391, 1530	42.4669	17	0.0350662	1456.27	80.9457
NF1	1568, 1668	38.7734	17	0.0400573	1618.33	111.179	1591-1736, CRAL_TRIO_2;
NF1	1831, 1896	71.459	21	0.0573192	1873.65	30.989
NF1	2380, 2492	60.2306	19	0.052369	2437.82	35.144
NFIL3	329, 395	27.6253	15	0.245254	368.4	20.7091	130-462, Vert_IL3-reg_TF;
ZNF517	309, 368	30.8465	16	0.534681	345.504	26.0202	317-339, F7IDP4.1;
ALPK2	92, 210	43.2158	17	0.0631416	138.98	56.6497
ALPK2	264, 388	37.3096	19	0.0717666	356.678	113.599
ALPK2	508, 626	27.6458	22	0.148881	562.298	243.208
ALPK2	1244, 1329	52.3797	19	0.0773598	1288.38	49.3318
ALPK2	1632, 1797	54.1137	24	0.0691449	1726.2	74.3971
ALPK2	1833, 1971	54.4444	25	0.0714393	1929.39	83.523
ALPK2	1988, 2145	51.0955	22	0.0713023	2050	63.4775	1925-2125, E9BHH3.1;
ZNF709	152, 272	16.2487	24	0.22137	251.891	114.097	211-235, H9IDK6.1;
ZNF709	384, 436	35.2148	18	0.182106	421.927	31.9023	406-431, H9KID0.1;
MLLT10	416, 515	34.5105	16	0.153635	457.583	34.9129
MLLT10	777, 912	27.5252	16	0.169083	818.332	55.7612
GARS	31, 42	87.476	24	0.410428	39.3851	6.11791
PSIP1	50, 151	21.5367	17	0.248073	108.092	46.1757
PSIP1	274, 354	27.6109	18	0.220352	314.195	38.7818
ATAD5	999, 1187	33.3992	17	0.0917921	1075.12	88.8642
ATAD5	45, 138	45.6699	16	0.100614	87.1615	29.1386
ATAD5	296, 526	50.4284	28	0.164143	423.056	99.3546
ATAD5	1423, 1802	51.3097	37	0.183723	1610.61	127.946
HIBCH	85, 232	11.0354	16	0.503903	152.8	60.397
ITGAL	208, 309	59.0479	26	0.149653	270.889	35.2789	156-331, VWA;
ITGAL	460, 570	42.5226	19	0.101846	519.224	36.6501
ITGAL	781, 889	46.6466	22	0.108896	839.944	41.5414	612-1016, Integrin_alpha2;
EIF4A2	233, 316	20.534	15	0.236985	279.334	33.913
MYH10	1293, 1482	55.3141	27	0.0957003	1400.49	82.0753	1073-1930, B1PF34.1;
MYH10	1557, 1670	40.9796	15	0.0578469	1608.94	34.5637	1073-1930, B1PF34.1;
MYH10	1821, 1976	44.37	20	0.0863469	1885.66	55.6301	1073-1930, B1PF34.1;
MYH10	945, 1095	37.6441	19	0.0748176	1013.67	96.9795
MYH10	765, 888	32.686	17	0.0682322	823.613	109.861
MYH10	81, 175	50.7456	18	0.0813769	117.975	34.86	87-771, Myosin_head;
MYH10	256, 397	40.5423	21	0.0683013	334.274	105.216	87-771, Myosin_head;
MAP3K1	305, 370	58.4524	21	0.0938988	327.209	29.5463
MAP3K1	431, 547	37.9478	19	0.0763723	468.144	71.894
MAP3K1	670, 795	42.1451	21	0.0812837	746.292	69.627
MAP3K1	1036, 1147	28.3697	19	0.142502	1090.36	129.002
MAP3K1	1182, 1283	44.5762	18	0.0638342	1227.2	34.4413
MAP3K1	1311, 1473	48.1098	25	0.104581	1376.93	66.7922	1243-1508, Pkinase;
GIGYF2	498, 613	51.5094	22	0.13669	565.814	37.021	534-589, GYF;
GIGYF2	698, 872	35.1236	21	0.108081	773.053	83.8391
GIGYF2	158, 233	42.9646	17	0.0994281	191.198	33.4974
GIGYF2	54, 140	32.7913	17	0.120774	121.526	60.471
SMAD4	65, 144	21.3264	17	0.139329	105.504	57.0141
SMAD4	351, 363	104.942	29	0.271193	359.117	4.06809
SMAD4	519, 544	45.0617	16	0.124878	532.776	8.60078
RET	756, 893	28.7757	21	0.145445	819.341	102.256	724-1005, B4IDX4.1;
RET	547, 640	25.2588	18	0.131492	586.963	104.107
RET	348, 480	30.8585	25	0.164347	415.535	122.402
POLE	279, 297	72.2804	15	0.0747236	286.708	5.21025
POLE	390, 436	64.0725	17	0.0765404	420.662	16.9918
POLE	1030, 1256	36.9507	23	0.0793253	1145.78	168.208	616-1156, E9BGH3.1;
POLE	1534, 1752	27.3991	22	0.159019	1654.57	250.025	1525-1925, DUF1744;
POLE	1826, 1930	43.7867	16	0.0629666	1880.46	48.9497	1525-1925, DUF1744;
SLC4A3	856, 924	48.5608	20	0.131187	881.837	36.4813	674-1161, HCO3_cotransp;
SLC4A3	214, 363	36.4946	21	0.128794	289.619	72.8066
SLC4A3	48, 171	29.6561	18	0.118562	136.368	78.8767
TSC2	115, 312	39.385	20	0.124356	229.904	78.0285	51-472, DUF3384;
TSC2	1395, 1558	33.152	15	0.115662	1468.58	63.8619
TSC2	843, 1113	39.9988	24	0.152724	988.022	113.518
TSC1	328, 477	27.4427	15	0.136397	395.084	58.6634	2-719, Hamartin;
TSC1	567, 882	22.4644	27	0.251311	725.466	174.522
TSC1	129, 222	45.5349	18	0.182741	177.903	23.7273
SMC3	876, 984	32.3091	17	0.153179	915.501	60.2511	2-1197, SMC_N;
SMC3	21, 230	38.4179	25	0.237035	116.67	65.3745	2-1197, SMC_N;
IRF2	13, 64	33.8745	19	0.341273	44.2653	18.1553	5-114, IRF;
IRF2	79, 153	23.7072	18	0.252921	109.93	28.1646
RXRA	412, 443	46.0968	16	0.334016	426.29	6.96197
SV2A	129, 200	39.8782	19	0.175074	159.17	28.0361	149-481, Sugar_tr;
SV2A	390, 454	29.734	17	0.160926	433.794	45.4658
CABYR	51, 227	10.7261	18	0.445154	143.345	87.3405
FRMPD2	78, 195	53.1475	26	0.116396	143.599	51.8238
FRMPD2	275, 421	36.261	22	0.0921196	339.963	90.1906	346-432, FERM_N;
FRMPD2	465, 558	44.2461	19	0.0974039	527.42	38.351	434-550, FERM_M;
FRMPD2	733, 795	63.7704	22	0.118964	765.252	17.8256
MEPCE	203, 363	29.691	22	0.45572	291.536	48.6553
ARID5B	143, 295	36.8546	21	0.130497	212.231	64.9351
ARID5B	372, 511	40.4455	21	0.127049	437.749	55.2501
ARID5B	981, 1044	49.8559	17	0.114657	1014.15	17.6879
TRIOBP	173, 373	63.1205	29	0.114865	287.934	86.9395
TRIOBP	511, 679	68.7463	28	0.0779715	601.699	66.6961
TRIOBP	963, 1125	74.3817	31	0.0757267	1039.65	65.7624
TRIOBP	1192, 1428	56.0644	25	0.107716	1316.77	76.1871
TRIOBP	1460, 1660	44.1065	25	0.0884353	1523.07	145.516
ALB	517, 594	33.8203	19	0.160618	545.799	27.674	412-592, Serum_albumin;
ALB	112, 197	23.6581	24	0.208314	155.109	86.0429	28-202, Serum_albumin;
PBRM1	115, 194	42.3272	18	0.0579105	158.854	57.4263
PBRM1	208, 298	45.2825	19	0.0616268	251.681	54.5274	186-275, B4IDI6.1;
PBRM1	415, 523	41.9421	17	0.0416968	471.838	43.8487	392-475, G4T9C2.1;
PBRM1	528, 666	68.523	28	0.0872582	595.487	37.8666	532-613, G4T9C2.1;
PBRM1	709, 798	46.5674	21	0.052193	757.235	65.778
PBRM1	821, 890	49.2972	18	0.06253	855.442	35.6053	785-867, G4T9C2.1;
PBRM1	976, 1049	55.1379	20	0.0492035	1019.88	29.1209
PBRM1	1231, 1316	44.951	18	0.0556721	1253.47	43.3878
PBRM1	1504, 1603	39.6363	15	0.0495778	1554.07	33.0458
EGFR	45, 160	67.1611	33	0.0652039	107.662	51.3289	57-168, Recep_L_domain;
EGFR	187, 229	41.6681	16	0.0408603	224.771	29.8349	177-338, E9IDZ2.1;
EGFR	246, 263	55.5903	15	0.0472894	252.579	10.6672
EGFR	288, 291	139.006	26	0.0973495	288.599	2.21177	177-338, E9IDZ2.1;
EGFR	351, 411	48.2866	18	0.0434109	374.725	27.4259
EGFR	592, 598	128.857	25	0.0884814	596.82	2.13439
EGFR	753, 792	51.9629	18	0.0463334	772.112	23.7471
EGFR	827, 843	67.1561	18	0.0472393	839.114	9.73763
PSMD3	83, 207	23.8569	21	0.42595	139.454	56.6085
CTNNB1	25, 45	541.002	143	0.594758	35.5811	4.28931
CTNNB1	322, 354	46.9765	15	0.0559382	338.227	9.14626
PLCG1	516, 652	26.0539	19	0.119827	586.632	122.642	550-639, SH2;
PLCG1	664, 809	27.6838	16	0.103446	732.385	79.6982	668-741, SH2;
PLCG1	184, 375	37.9805	26	0.159487	299.56	104.811	245-318, EF-hand_like;
PLCG1	873, 1031	35.7513	21	0.151454	941.169	80.3096	952-1070, G4TF21.1;
PLCG1	1120, 1261	29.1616	16	0.130193	1190.83	58.8693
RBM26	21, 194	25.9889	18	0.320939	149.327	69.9767
CDK12	840, 939	38.4315	17	0.115974	900.04	51.2559	727-1020, Pkinase;
CDK12	342, 602	33.0864	27	0.193831	480.232	151.987
ZMYM5	140, 341	21.7063	24	0.368227	248.294	88.2326	237-276, zf-FCS;
CDK17	151, 274	19.49	17	0.230452	214.677	53.9756	192-473, Pkinase;
DYM	459, 639	18.6634	20	0.325721	544.455	76.5187	1-646, Dymeclin;
KLF5	175, 255	18.3284	16	0.20615	210.254	52.456
HNF1A	94, 210	39.9799	26	0.310742	151.903	40.8801	1-176, HNF-1_N;
AARS2	427, 566	21.8559	16	0.212719	496.096	90.09	41-624, tRNA-synt_2c;
AARS2	630, 781	22.7532	17	0.208121	709.16	85.9009
EPAS1	13, 92	40.5528	18	0.170998	57.0357	26.6523
EPAS1	578, 710	18.6496	17	0.159356	641.683	108.788
GFAP	180, 361	15.3028	26	0.477923	276.498	77.0365	68-376, Filament;
GPR128	292, 419	34.0332	22	0.199002	346.057	54.7138
GPR128	629, 760	29.485	21	0.174669	696.571	59.4255
ZNF687	927, 1114	39.6882	23	0.174369	1019.82	57.9816
ZNF687	287, 462	28.3885	18	0.11715	383.387	81.5349
ST6GALNAC5	145, 220	22.3925	19	0.324945	177.802	34.0305	29-318, Glyco_transf_29;
CRAT	96, 300	14.8655	18	0.328844	207.551	88.7979	34-616, Carn_acyltransf;
CRAT	405, 599	17.8702	21	0.317584	490.365	73.3705	34-616, Carn_acyltransf;
SPIRE2	287, 449	25.7289	24	0.328738	347.686	82.1494
CYP11B1	75, 120	45.4525	21	0.138306	99.3037	15.6101
CYP11B1	260, 422	33.8104	38	0.318409	336.92	65.6428
SLC1A3	207, 318	20.4627	22	0.219058	265.574	76.441	50-497, SDF;
SLC1A3	354, 479	17.0926	17	0.19081	416.383	63.5412	50-497, SDF;
PCK1	273, 336	40.8174	22	0.182485	306.446	33.4315	29-622, PEPCK;
ZFPM1	44, 48	125.578	24	0.417592	44.753	1.77487
ZFPM1	431, 445	51.7339	15	0.2537	440.147	11.2652
ZNF334	318, 391	31.2206	20	0.14108	343.051	50.2647	335-360, H9KID0.1;
ZNF334	495, 597	19.6747	17	0.174734	543.7	79.5369
TNRC6B	1547, 1760	39.6469	22	0.10057	1654.05	93.7488
TNRC6B	1061, 1310	31.6002	19	0.101586	1179.86	117.81
TNRC6B	348, 504	20.5644	19	0.217398	424.332	241.516
TNRC6B	668, 790	47.1756	19	0.13969	725.459	46.1219
USP28	178, 255	38.5414	19	0.189169	231.487	44.7868	161-647, G4TVC7.1;
USP28	805, 979	27.544	19	0.129186	889.335	81.4344
CYP4F3	393, 499	34.6323	29	0.202437	442.774	48.5952	52-515, p450;
ASB5	245, 303	17.8353	15	0.204333	277.064	31.3169	209-293, H3IDJ8.1;
NFE2L2	24, 34	185.453	48	0.405129	30.0598	3.31531
NFE2L2	77, 82	182.789	39	0.325813	79.9754	1.34721
CBFB	48, 112	18.0523	21	0.424855	83.5259	24.4106
ZNF263	325, 420	22.7439	15	0.159481	368.097	41.4256
ZNF263	490, 609	24.4196	16	0.248541	540.83	44.7311
CDH1	63, 113	40.3165	17	0.0680046	81.9439	27.6183
CDH1	144, 222	50.339	24	0.111654	192.561	36.0478	159-253, Cadherin;
CDH1	224, 261	43.7729	18	0.0782182	241.698	28.2349
CDH1	365, 431	35.3264	16	0.0667574	393.133	32.806	380-478, Cadherin;
CDH1	644, 733	26.3467	18	0.116715	688.988	73.1727
KNDC1	1477, 1684	39.362	22	0.0915171	1573.78	92.4421	1465-1677, G4TN99.1;
KNDC1	1145, 1281	48.8343	20	0.105052	1212.93	49.1044
KNDC1	928, 1111	46.9425	27	0.126304	1048.56	107.351
KNDC1	346, 492	54.8061	22	0.112384	423.791	43.6125
JAKMIP2	250, 334	40.2703	22	0.131518	298.284	43.4869
JAKMIP2	34, 163	55.7122	35	0.233528	91.8171	48.7409
JAKMIP2	476, 558	43.7602	23	0.101931	519.078	39.2558
CDKN2A	42, 58	39.7549	30	0.123718	54.8947	16.9894
CDKN2A	71, 89	122.123	52	0.284263	80.8165	4.25395
CDKN2A	101, 114	103.537	41	0.211761	109.858	3.80654
CDKN2A	118, 129	41.0707	17	0.0969265	120.734	4.38059
TPO	148, 206	54.4692	24	0.0694603	172.937	32.9556
TPO	398, 457	41.2351	21	0.0599412	416.507	42.7462	151-709, An_peroxidase;
TPO	540, 633	43.7464	25	0.0945264	579.047	57.7294	151-709, An_peroxidase;
TPO	640, 712	38.7811	19	0.0693187	684.216	41.7096	151-709, An_peroxidase;
TPO	834, 906	47.3066	23	0.0832018	856.73	37.4636
TSC22D2	419, 611	10.9046	16	0.343495	516.121	138.788
CCDC150	200, 351	27.7181	16	0.168092	268.173	63.1867
CCDC150	54, 189	35.4833	18	0.201072	124.238	45.4392
SHOX2	111, 178	24.0609	19	0.317529	152.969	28.9592	141-197, Homeobox;
ZNF644	21, 154	34.3722	17	0.109662	87.0557	48.5476
ZNF644	212, 324	33.3595	15	0.0994609	262.774	43.416
ZNF644	367, 524	31.9168	19	0.131596	440.076	87.6173
ZNF644	913, 1086	25.2678	16	0.0980614	994.257	92.7306
FN1	18, 206	52.6561	23	0.0802121	139.628	72.4099	97-135, fn1;
FN1	232, 384	50.4957	20	0.0598199	314.665	60.08	308-342, fn1;
FN1	776, 890	72.0296	25	0.115974	825.241	34.8066	812-891, fn3;
FN1	1097, 1185	54.0985	19	0.0664136	1130.77	45.3522	1094-1163, fn3;
FN1	1451, 1643	31.5401	19	0.0763401	1578.07	166.35	1543-1623, fn3;
FN1	1811, 1993	58.7037	24	0.0873102	1911.39	60.2686
APP	488, 595	22.9476	19	0.203334	533.656	85.0589	363-549, A2BID8.2;
APP	246, 359	25.7498	18	0.150575	307.771	64.8338	290-342, Kunitz_BPTI;
IPP	292, 402	22.7058	16	0.31529	355.685	41.3069	332-377, Kelch_1;
APC	211, 216	102.909	19	0.0382221	214.895	4.74928
APC	283, 332	52.816	17	0.0303338	282.038	43.3888
APC	542, 587	74.4232	18	0.0323041	560.663	13.1142
APC	757, 805	52.7572	17	0.0283906	804.465	43.3689
APC	856, 887	70.7296	16	0.0291286	872.975	10.5959
APC	918, 984	54.8404	17	0.0263082	937.028	39.7928
APC	1105, 1128	76.9956	16	0.0289029	1114.88	5.75795
APC	1277, 1298	66.7259	16	0.0310198	1295.87	14.0694
APC	1301, 1338	93.0071	24	0.0427807	1307.84	18.143
APC	1366, 1387	77.1119	18	0.0356382	1374.58	14.1146
APC	1393, 1419	75.2345	19	0.0379163	1402.81	20.2795
APC	1443, 1453	145.035	26	0.0541188	1449.23	3.81695
APC	1519, 1583	73.0055	21	0.0333018	1549.41	30.2155
APC	2166, 2253	48.8911	16	0.0247211	2213.71	45.7396
FOXP2	255, 346	31.1743	22	0.144324	306.688	63.9321
FOXP2	148, 197	41.0169	16	0.139136	170.791	17.6931
FOXP2	497, 591	29.8724	18	0.123315	553.865	45.706	504-593, G4TEP2.1;
ADNP	938, 1058	27.5487	15	0.118029	989.893	50.6828
ADNP	154, 306	21.4484	18	0.218327	217.771	121.857
EMR1	302, 400	43.1616	22	0.11863	357.711	39.9325
EMR1	628, 721	37.6946	23	0.143112	649.104	57.6065	599-840, 7tm_2;
EMR1	483, 579	37.8592	22	0.131253	539.425	54.995
FUBP1	88, 206	22.5306	17	0.159436	150.162	57.7885	102-164, G4T4Y1.1;
FUBP1	1, 81	27.9978	17	0.1259	39.0994	35.4602
FUBP1	398, 480	29.5878	15	0.159913	440.997	28.4414	378-443, G4T4Y1.1;
FUBP1	492, 604	23.7435	17	0.174716	542.391	53.9124
RBBP6	1218, 1367	28.994	17	0.0891966	1272.16	122.036
RBBP6	974, 1161	48.7386	24	0.102727	1085.24	76.5644
RBBP6	1433, 1598	61.5524	28	0.133286	1497.74	53.0039
RBBP6	496, 602	52.4777	20	0.0776628	557.825	39.1661
RBBP6	91, 225	42.1413	19	0.100923	141.162	54.7314
MED1	423, 533	34.5078	15	0.113175	481.029	49.8949
MED1	984, 1154	34.954	21	0.158552	1076.32	104.69
ZNF598	93, 273	19.3379	15	0.2725	177.38	78.1933
SPEN	117, 314	73.237	28	0.051878	223.694	88.7569
SPEN	376, 491	42.3493	16	0.0323037	428.051	98.7915
SPEN	561, 726	75.5715	28	0.0678366	626.816	83.9534
SPEN	756, 877	52.2829	19	0.037908	805.714	81.9852
SPEN	1034, 1190	54.3089	20	0.0434419	1130.91	81.6565
SPEN	1395, 1537	66.4501	22	0.049646	1452.76	50.1862
SPEN	1679, 1779	73.3974	21	0.0447156	1726.4	25.8981
SPEN	1934, 2081	49.6412	19	0.0352573	2015.69	94.0421
SPEN	2113, 2260	43.7076	18	0.0345925	2171.34	118.258
SPEN	2562, 2624	52.66	15	0.0434052	2591.82	37.2623
SPEN	2846, 3003	43.4812	18	0.0476694	2893.08	116.801
SPEN	3249, 3403	52.0012	20	0.0422756	3325.91	98.3076
ZNF606	588, 719	29.6707	24	0.286435	649.036	77.5701	638-663, H9KID0.1;
HRNR	309, 342	64.7854	16	0.0308375	328.919	14.3215
HRNR	423, 506	72.9653	22	0.0343644	461.085	30.3401
HRNR	557, 625	29.9167	17	0.079362	678.479	167.733
HRNR	653, 729	53.8866	21	0.041769	673.409	82.2182
HRNR	806, 899	67.34	22	0.042166	874.042	36.3717
HRNR	1685, 1794	34.4973	15	0.0469229	1780.68	89.2011
HRNR	1894, 1936	88.3131	25	0.0424343	1908.12	29.1763
HRNR	1955, 1995	77.3845	21	0.038177	1973.88	26.0038
HRNR	2019, 2043	78.1196	18	0.0419539	2027.43	12.7644
HRNR	2126, 2144	104.788	21	0.0489479	2136.53	5.8833
HRNR	2662, 2831	64.9684	26	0.0463955	2745.63	56.0533
U2AF1	24, 38	65.684	23	0.582601	33.1167	4.05934	13-39, G4TMV8.1;
TCP11L2	152, 295	22.3501	25	0.324259	226.104	74.9357	76-502, Tcp11;
MKL1	19, 116	50.1373	24	0.204168	69.2075	23.9274
MKL1	228, 330	34.8443	17	0.178328	264.523	38.2201
MKL1	439, 602	24.0958	17	0.169364	512.316	69.5407
FLT3	290, 595	38.2631	45	0.279717	451.013	128.147
FLT3	814, 976	63.6063	42	0.182727	882.942	67.0573
CLDN23	129, 253	14.0044	19	0.64062	183.274	39.7453
L1TD1	340, 471	44.9971	26	0.19314	403.249	49.8701
L1TD1	601, 728	25.8754	15	0.165269	674.36	45.473	518-864, Transposase_22;
L1TD1	52, 138	55.7437	26	0.177932	93.1631	27.6779
ANGPT4	71, 158	27.2803	21	0.209424	116.956	44.5765
ANGPT4	417, 492	24.4992	16	0.156741	455.071	29.7126	287-501, Fibrinogen_C;
TRERF1	780, 939	41.2771	25	0.130327	855.425	69.6914
TRERF1	1118, 1182	54.5834	21	0.137782	1137.8	20.9666
TRERF1	611, 707	37.1088	21	0.105223	636.357	72.1119
TCF12	299, 523	10.4701	25	0.447813	409.785	165.493
TCF12	559, 676	27.2057	18	0.206215	609.567	40.5848	578-631, HLH;
TCTE1	149, 236	25.9531	19	0.171169	191.801	44.4098
TCTE1	288, 375	19.8683	19	0.218999	318.601	64.7317	331-356, E9BMS5.1;
IBTK	5, 118	37.9669	17	0.146796	52.2115	35.5463	22-116, H3IDJ8.1;
IBTK	610, 752	20.4883	15	0.14146	677.202	130.282
IBTK	423, 575	24.027	16	0.13121	500.556	109.071
ZNF628	146, 292	30.0756	17	0.278415	221.589	51.3116
ZNF628	505, 824	10.0365	16	0.307386	666.67	193.131
EPS8L3	82, 257	26.9246	26	0.273859	172.233	62.0641
EPS8L3	428, 561	25.6687	23	0.246271	491.331	53.7885	456-501, SH3_1;
ABTB1	136, 279	11.8332	18	0.441201	223.287	83.0053	105-212, BTB;
MGA	424, 645	42.7345	18	0.105906	509.982	85.615
MGA	88, 274	48.5468	19	0.117999	162.077	61.8806	76-261, T-box;
MGA	808, 1007	50.105	20	0.111509	913.632	75.0731
MGA	1203, 1348	42.5719	17	0.0823973	1293.73	80.2833
MGA	1492, 1761	45.4808	21	0.0980253	1593.94	114.868
SEMA5B	218, 328	39.9468	22	0.124782	274.741	66.1782
SEMA5B	358, 474	35.5224	20	0.102618	403.409	66.753	126-537, Sema;
SEMA5B	604, 707	29.3925	20	0.105521	655.452	98.0373
SEMA5B	828, 910	40.2562	18	0.10234	855.393	35.7876	857-907, TSP_1;
SEMA5B	986, 1124	35.7987	19	0.0978021	1054.54	47.6282
TRIM9	143, 219	25.7729	17	0.195755	182.567	56.9445
TRIM9	612, 704	43.1566	23	0.146769	659.253	30.3329	576-698, E9BBM4.1;
TRIM9	410, 475	27.4204	17	0.16794	447.639	52.4369	441-525, fn3;
ARHGAP18	116, 266	22.2473	19	0.416537	187.342	62.1259
NSD1	425, 565	45.3141	17	0.0453417	508.781	58.3924
NSD1	589, 728	43.6261	19	0.0556698	639.055	97.4058
NSD1	744, 874	41.161	16	0.0508233	815.089	71.0755
NSD1	1433, 1541	47.8483	18	0.0610261	1497.82	68.5561
NSD1	1594, 1757	40.4141	21	0.0737267	1673.28	151.662
NSD1	1952, 2017	68.9734	19	0.0590694	1994.04	20.8026
NSD1	1122, 1218	54.0752	18	0.064811	1175.39	42.6089
CREBBP	174, 277	50.6069	17	0.0466404	229.243	32.3463
CREBBP	631, 726	33.9334	17	0.0726476	689.439	129.694
CREBBP	813, 960	44.3448	22	0.0630353	878.771	119.788
CREBBP	1038, 1152	41.5006	20	0.0671661	1099.04	115.771	1094-1180, G4T9C2.1;
CREBBP	1417, 1471	64.618	18	0.05582	1446.26	22.5761	1342-1648, B4IDI6.1;
CREBBP	1614, 1767	45.809	30	0.119601	1663.2	206.512
CREBBP	2051, 2160	64.7196	22	0.0630325	2111.08	36.9448	2016-2115, Creb_binding;
TMC4	14, 115	34.9765	21	0.269445	67.913	37.1746
ZNF337	243, 456	21.3193	27	0.299595	361.38	118.217	334-359, H9IDK6.1;
PDGFRA	245, 313	19.7635	18	0.25617	284.871	143.091
PDGFRA	487, 560	47.3661	24	0.0867526	518.718	54.5169
PDGFRA	836, 948	27.7681	22	0.140927	894.03	116.874
PDGFRA	1013, 1088	39.4889	18	0.0702027	1043.38	30.9966
ATM	219, 284	58.7724	15	0.0450176	252.63	14.3371
ATM	597, 749	46.7777	18	0.0403585	672.355	70.7142
ATM	1381, 1500	49.3179	17	0.0379371	1453.72	53.2453
ATM	1617, 1730	47.6617	15	0.0383031	1677.86	38.3605
ATM	2060, 2164	40.8414	15	0.0337739	2112.91	68.6226	2096-2489, C5GID1.1;
ATM	2363, 2494	52.2225	17	0.0434458	2432.95	42.4765	2096-2489, C5GID1.1;
ATM	2691, 2726	62.4703	16	0.033193	2707.53	18.3662
ATM	2845, 2937	68.8097	21	0.0601785	2875.9	36.1411
ATM	2987, 3032	60.1414	15	0.0455811	3006.27	16.1256
ZFHX3	30, 177	72.2439	25	0.0412008	105.672	62.0204
ZFHX3	285, 417	60.8281	23	0.0374686	347.373	94.1579
ZFHX3	544, 641	64.2329	19	0.0403988	601.864	40.033
ZFHX3	777, 885	50.9925	16	0.0361477	850.042	50.027
ZFHX3	962, 1138	66.0824	26	0.0536529	1032.19	100.814
ZFHX3	1860, 1944	63.6151	18	0.0385991	1904.39	35.3759
ZFHX3	2035, 2200	49.0946	17	0.0297275	2118.1	62.499
ZFHX3	2361, 2479	51.1344	17	0.0315253	2427.86	60.7893
ZFHX3	2585, 2737	45.275	21	0.0553901	2657.18	163.786	2642-2698, Homeobox;
ZFHX3	2950, 3073	42.1511	17	0.0412843	3007.89	117.075
ZFHX3	3177, 3340	47.6595	19	0.0346347	3251.15	110.338
ZFHX3	3498, 3668	70.8496	26	0.0523439	3572.47	70.4735
TIGD4	96, 201	25.2372	21	0.203778	149.15	53.4791
TIGD4	270, 349	28.6996	20	0.226801	317.477	41.6928
TXNIP	139, 194	29.8195	17	0.194253	168.137	18.9215
TXNIP	31, 109	19.0298	19	0.228073	78.1667	50.0636	10-152, Arrestin_N;
MCTP1	428, 549	23.996	23	0.241554	496.727	134.958	472-553, E3RID5.1;
MCTP1	794, 947	35.1595	23	0.159557	868.161	65.0562	846-977, PRT_C;
KIF19	234, 389	36.7326	22	0.200075	320.624	54.9001	17-346, E9BH10.1;
KIF19	747, 961	32.768	28	0.192005	852.982	92.0559
GAS2L2	432, 523	30.6744	21	0.137522	482.415	74.6633
GAS2L2	540, 655	19.9877	17	0.169754	592.044	102.702
MYH9	92, 234	50.3512	21	0.0728727	168.167	54.7862	83-764, Myosin_head;
MYH9	488, 567	51.1871	17	0.0667877	526.086	31.6321
MYH9	749, 877	44.3424	25	0.0860251	861.238	113.577
MYH9	954, 1070	43.4377	17	0.0652509	1004.56	44.9031
MYH9	1259, 1417	33.4357	20	0.0718309	1346.19	137.888
MYH9	1472, 1792	43.1289	31	0.12243	1640.69	162.658	1066-1923, B1PF34.1;
AMDHD1	189, 290	11.8962	18	0.279473	237.309	81.8837	73-392, E2JE28.1;
AMDHD1	3, 17	45.1584	19	0.255958	12.9771	13.3246
MED23	314, 479	26.7701	17	0.114348	394.973	101.1	1-1307, Med23;
MED23	45, 170	38.1533	19	0.136487	109.775	54.282	1-1307, Med23;
MED23	1075, 1242	28.5246	17	0.122776	1157.83	80.2512	1-1307, Med23;
MED23	520, 724	7.32365	17	0.402528	631.488	348.193	1-1307, Med23;
FBXW7	465, 465	233.196	42	0.178546	465.051	1.09275
FBXW7	479, 481	60.9161	18	0.0695664	473.581	6.81921
FBXW7	502, 526	95.1159	44	0.198737	493.731	26.8987
FBXW7	651, 667	56.1128	15	0.0581718	657.855	4.24962
CLIC6	430, 703	28.0864	34	0.475201	574.88	76.4315
TGFBR2	277, 348	29.5381	18	0.174718	296.304	34.835	244-538, Pkinase;
TGFBR2	468, 531	33.4249	20	0.176683	493.501	30.455
LARP4B	145, 178	49.4913	16	0.170398	162.944	8.42241
TET2	509, 612	48.5796	17	0.126711	548.122	31.5373
TET2	716, 849	49.3415	19	0.114854	764.526	40.096
TET2	75, 202	51.5072	21	0.139422	125.676	49.5818
MTOR	298, 534	42.4676	24	0.0750033	431.278	155.561
MTOR	602, 773	40.4623	21	0.0594272	678.867	136.504
MTOR	989, 1160	37.4706	18	0.0601608	1078	118.845
MTOR	1426, 1483	57.8887	17	0.0594541	1463.91	22.8528
MTOR	1966, 2033	60.4842	18	0.0643856	1995.73	24.4927
MTOR	2206, 2230	73.4688	16	0.0644849	2214.81	7.65101	2181-2431, G7IDC0.1;
MTOR	2407, 2532	54.1451	21	0.0531279	2468.66	53.8046
EP300	1389, 1409	74.8393	15	0.0716465	1399	4.97793
EP300	207, 402	36.8328	19	0.0669671	333.802	119.835
EP300	479, 648	38.242	21	0.0660883	574.047	143.653
EP300	708, 840	40.1306	18	0.0541299	782.881	94.0815
EP300	1959, 2163	34.0148	17	0.052703	2064.92	113.704	1990-2099, Creb_binding;
EP300	1581, 1678	58.4785	18	0.0617617	1634.57	25.7854
EP300	1095, 1237	32.9119	20	0.0962341	1271.46	132.292	1155-1196, B1PM12.1;
TAOK2	113, 326	33.4902	27	0.223717	224.981	121.397	28-281, Pkinase;
FAM65B	506, 559	44.8257	16	0.191625	531.904	18.3378
FAM65B	59, 233	36.9332	25	0.197154	140.537	67.496
FAM65B	253, 412	29.8882	20	0.151964	334.741	86.6345
IRS1	195, 263	52.5522	20	0.144495	235.541	25.4657
IRS1	42, 134	30.91	16	0.103593	108.701	57.7822	13-115, G4TR57.1;
IRS1	651, 776	22.9961	19	0.156509	714.467	142.1
KEAP1	137, 189	32.4586	23	0.214742	163.707	58.4585
KEAP1	231, 284	25.5456	15	0.0868791	263.72	41.7906
KEAP1	449, 493	51.6788	21	0.100982	471.181	11.2864	459-504, Kelch_1;
SLC39A5	267, 377	22.104	15	0.360028	317.528	38.8599	210-527, Zip;
ZNF471	223, 456	13.2464	33	0.469684	346.463	148.754	332-357, zf-H2C2_2;
ZNF471	479, 600	25.9495	19	0.178617	537.067	45.9182	529-554, H9IDK6.1;
AATK	888, 1074	33.8125	18	0.221242	976.579	62.3599
AATK	332, 691	18.1742	16	0.182365	512.38	141.11
PHF14	617, 829	17.9643	17	0.221574	713.493	79.8411
TCEB3	408, 631	14.2174	20	0.360311	523.521	138.028
ERCC2	241, 312	30.263	17	0.178655	283.706	39.9469	268-413, G4U3C1.1;
ERCC2	383, 554	22.7465	19	0.173044	472.305	73.8677
ERCC3	278, 410	19.4714	16	0.179358	370.268	79.9605	313-472, ResIII;
ERCC3	520, 704	26.0625	26	0.257849	582.081	96.0897	573-647, A6EID0.1;
ERCC3	32, 142	24.7342	15	0.148021	87.864	44.2674	75-207, Helicase_C_3;
MSH4	683, 777	37.8272	18	0.117578	730.251	37.7172
MSH4	802, 923	39.1736	23	0.169777	851.109	47.308
MSH4	170, 261	26.5535	16	0.0989054	208.492	62.7681	155-298, MutS_II;
MSH4	448, 575	29.1478	20	0.125956	507.351	77.9866	314-628, MutS_III;
MSH6	224, 383	18.5032	15	0.126163	335.512	147.287
MSH6	422, 530	27.8258	15	0.10388	471.056	74.025	407-526, MutS_I;
MSH6	912, 993	44.1744	16	0.108807	951.784	23.125	737-1065, MutS_III;
MSH6	1196, 1334	34.171	18	0.107148	1269.98	51.6253	1074-1326, MutS_V;
MSH6	591, 887	12.2871	24	0.399121	728.787	311.686	737-1065, MutS_III;
EZH2	662, 740	36.2478	20	0.195997	693.368	29.7629	623-727, E9IDS4.1;
EZH2	207, 359	16.0834	18	0.21174	280.683	107.853
SORBS2	340, 421	49.8901	21	0.133451	369.448	31.8081
SORBS2	467, 609	31.8625	26	0.167933	497.582	118.658
SORBS2	683, 894	27.2896	23	0.187694	797.364	114.192
SMARCA4	1211, 1267	44.5153	15	0.0650501	1224.24	25.8044
SMARCA4	1339, 1471	49.5307	24	0.0582623	1400.59	68.8695
SMARCA4	740, 828	42.7802	18	0.0662381	789.27	53.7916	757-1052, Q5CID0.1;
SMARCA4	861, 930	43.2403	18	0.0620671	917.688	51.0777	757-1052, Q5CID0.1;
SMARCA4	966, 1068	55.0085	23	0.0963775	1007.77	51.3822
SMARCA4	601, 697	42.1482	19	0.0667586	663.075	62.3734	610-655, BRK;
SMARCA4	1083, 1162	40.6717	15	0.0618219	1118.09	35.0992	1114-1194, A9LID3.1;
SMARCA4	325, 446	33.6256	16	0.0652871	385.324	72.6477
RNF31	812, 924	31.7981	16	0.142637	885.057	44.4593
RNF31	74, 237	27.5897	17	0.136918	158.149	62.0985
RNF31	378, 658	13.9739	32	0.422722	514.278	261.651
ZNF721	271, 438	38.3755	27	0.24721	350.054	70.66	349-371, zf-C2H2;
ZNF721	730, 854	36.5131	24	0.192389	784.528	56.48	783-808, H9IDK6.1;
ARAP3	86, 197	33.3892	17	0.0976721	136.953	73.8101
ARAP3	1329, 1464	32.3278	16	0.0879674	1384	60.1278
ARAP3	924, 1091	41.8935	21	0.142611	1021.98	60.2748	920-1073, RhoGAP;
ARAP3	357, 681	34.8907	34	0.208301	533.165	193.621	489-607, ArfGap;
AXIN1	610, 810	34.1028	27	0.249772	713.235	68.397
RB1	53, 97	35.6565	16	0.0684291	91.5066	32.1993
RB1	114, 170	37.0048	17	0.0751822	130.749	35.6991	105-229, DUF3452;
RB1	251, 350	43.9188	28	0.121986	297.458	70.0271
RB1	436, 455	60.5779	16	0.0789985	448.18	5.96751
RB1	536, 580	49.1508	18	0.0699508	553.351	19.2843
RB1	695, 761	30.2148	15	0.0740352	728.022	41.2077	645-766, RB_B;
RB1	770, 802	44.5374	15	0.0705158	778.426	14.7367
SMAD2	300, 335	37.9741	16	0.244151	313.732	12.2341	268-445, MH2;
SMAD2	407, 464	30.4913	18	0.257122	443.463	21.3561	268-445, MH2;
MED15	287, 519	15.4183	23	0.350158	408.813	143.255	17-788, Med15;
SUZ12	265, 383	33.0048	20	0.193261	332.961	36.3773
SUZ12	101, 228	18.7677	20	0.234307	210.378	85.5225
INTS7	241, 398	19.7734	17	0.230724	290.948	104.159
INTS7	67, 199	29.5163	17	0.207692	141.324	54.3547
INTS7	562, 832	15.8485	19	0.219997	691.471	135.35
CDC42EP1	68, 260	10.8892	27	0.550101	166.242	74.7106	115-220, BORG_CEP;
MLL	1058, 1264	45.397	19	0.0629651	1164.37	128.77	1147-1194, zf-CXXC;
MLL	1566, 1707	56.6547	21	0.0602164	1637.62	96.6846
MLL	2213, 2439	58.3855	23	0.0530173	2343.22	96.6549
MLL	2561, 2725	46.6226	18	0.0554003	2691.5	89.8372
MLL	2765, 2946	50.0711	21	0.0587448	2791.56	99.5315
MLL	3045, 3202	44.6987	19	0.0617365	3140.11	140.755
MLL	3647, 3823	59.7838	20	0.0647954	3726.33	58.7022	3666-3749, F4WID5.1;
SYNGAP1	45, 173	35.0838	19	0.151939	113.269	69.4449
SYNGAP1	852, 1019	30.854	16	0.171637	942.916	57.9373	718-1313, DUF3498;
PPM1D	406, 598	30.6662	34	0.32164	502.988	64.4786
AHCY	196, 352	12.6147	18	0.396147	268.31	60.2108	5-431, AdoHcyase;
NOTCH1	37, 81	69.1	17	0.0646642	58.7012	10.8558
NOTCH1	412, 513	107.584	35	0.131276	451.155	34.9711
NOTCH1	767, 893	32.2378	18	0.057488	835.889	164.264
NOTCH1	1063, 1165	42.1545	15	0.0421892	1112.6	49.586	1113-1141, F7HID4.1;
NOTCH1	1305, 1523	37.0039	20	0.0588503	1391.69	140.392
NOTCH1	1906, 1977	52.739	17	0.0483762	1943.12	37.7948	1914-1981, H3IDJ8.1;
NOTCH1	1980, 2085	42.6278	16	0.0531273	2006.3	56.9993	1999-2091, H3IDA8.1;
NOTCH1	2327, 2487	42.1553	18	0.0451451	2408.34	71.8386
NOTCH2	114, 238	65.797	23	0.0868096	174.848	41.1236
NOTCH2	386, 507	52.8816	19	0.0659194	451.708	49.1092
NOTCH2	1630, 1800	49.8163	26	0.0857457	1775.86	114.218
NOTCH2	1841, 1983	42.0985	18	0.0533999	1892.91	78.1891	1851-1940, H3IDA6.1;
NOTCH2	2219, 2359	49.1937	22	0.053155	2276.58	91.2554
NOTCH2	1087, 1218	41.0332	16	0.057187	1124.23	60.8846
ARHGAP35	965, 1039	50.0272	17	0.152008	998.68	19.6088
ARHGAP35	8, 109	45.967	19	0.124233	57.5742	33.928
TWISTNB	267, 330	24.7254	18	0.301635	291.748	24.3346
PTCH1	590, 759	46.1118	29	0.122985	674.513	104.75
PTCH1	466, 571	23.0492	15	0.114003	524.087	119.431	462-616, Sterol-sensing;
PTCH1	197, 294	34.5151	15	0.0678934	252.186	45.398
PTCH1	1366, 1437	58.987	21	0.106357	1406.71	23.1753
PTCH1	1043, 1223	25.7114	21	0.162024	1130.3	159.616	965-1180, G4TPT7.1;
GNPTAB	587, 786	30.4774	21	0.134437	688.686	95.4467
GNPTAB	968, 1139	33.5021	21	0.182261	1071.64	79.1985
ZRANB3	886, 1069	29.8982	19	0.215304	963.147	57.5664
ZRANB3	391, 704	10.2326	27	0.443611	553.671	281.433
DNMT1	352, 590	30.9631	26	0.163469	474.394	180.298	399-534, DNMT1-RFD;
DNMT1	87, 269	28.2962	16	0.106168	185.098	93.1681
DNMT1	696, 1037	42.36	34	0.17152	863.78	152.196	755-880, BAH;
DNMT1	1231, 1507	46.8498	32	0.155191	1351.21	115.849	1139-1594, DNA_methylase;
MAP3K7	186, 349	16.2662	21	0.286165	289.305	97.4702	36-284, B4IDX4.1;
BRDT	136, 246	35.2835	18	0.111618	190.407	44.7452
BRDT	320, 409	37.9665	19	0.108769	362.429	40.6577
BRDT	712, 888	27.3281	21	0.137859	797.946	86.2315
GUSB	330, 430	25.9442	17	0.23408	377.181	48.8535
GUSB	467, 602	20.0716	17	0.243308	531.076	58.2772	329-631, Glyco_hydro_2_C;
ERBB2	767, 781	58.999	16	0.113078	768.334	10.3981	720-976, B4IDX4.1;
ERBB2	305, 313	91.6801	18	0.139964	309.219	2.57536
ERBB2	573, 705	10.849	17	0.357339	601.183	255.942	510-643, GF_recep_IV;
ERBB3	40, 623	64.3172	116	0.502077	332.287	228.721
CASZ1	69, 273	37.9164	20	0.0966143	167.871	73.8701
CASZ1	503, 612	42.791	18	0.109375	559.567	54.0854
CASZ1	669, 723	45.3762	15	0.110962	707.429	28.0641
CASZ1	1250, 1419	40.7984	24	0.128238	1368.6	109.832
CASZ1	1449, 1607	29.234	15	0.0846135	1490.58	77.8477
IDH2	172, 172	77.9341	18	0.429086	171.479	2.31583
IDH1	132, 132	1647.54	274	0.897914	131.985	0.403865
PER3	643, 884	35.4981	28	0.225054	766.566	110.123
PER3	898, 1162	36.2171	29	0.212946	1020.39	102.146	987-1195, Period_C;
PER3	61, 252	23.8448	16	0.132493	163.013	85.7764
SETD2	432, 612	53.2527	22	0.0649299	541.941	72.396
SETD2	815, 944	48.4014	16	0.0598131	875.847	35.4331
SETD2	1207, 1368	49.5428	21	0.054742	1267.97	80.6957
SETD2	1478, 1541	57.6707	17	0.0609138	1507.54	25.0042
SETD2	1589, 1640	56.2523	16	0.0637094	1624.28	24.9597	1561-1667, SET;
SETD2	1690, 1876	53.6956	22	0.0834305	1766.2	62.9611
SETD2	2064, 2160	44.955	15	0.0544621	2116.42	39.0457
SETD2	2257, 2511	42.5391	23	0.0711991	2358.03	124.875
FGFR2	203, 570	31.0999	82	0.48947	387.55	177.41
FGFR3	248, 254	79.9468	17	0.252624	249.052	2.57862
FGFR3	349, 456	22.6699	16	0.170694	374.005	67.5835
FGFR3	546, 762	26.8574	23	0.213013	644.528	71.3969	472-748, F4PID8.1;
RASGRF2	138, 289	35.4266	27	0.135978	248.452	117.606
RASGRF2	459, 526	53.6262	20	0.115382	480.547	23.9165
RASGRF2	868, 978	50.9707	23	0.127564	920.348	41.5904
PCDHGB1	84, 157	35.7348	17	0.109051	110.929	37.1133
PCDHGB1	189, 281	34.2096	20	0.115852	247.613	58.0906
PCDHGB1	296, 394	28.7346	19	0.1223	314.288	66.2133
PCDHGB1	511, 597	30.1115	15	0.0969435	554.462	41.663
PCDHGB1	698, 763	39.9361	17	0.117643	722.142	23.9823
TCF7L2	382, 509	16.8496	16	0.283227	437.047	73.6666
KIT	2, 74	57.6461	24	0.165416	44.0074	22.8881
KIT	882, 973	31.2818	16	0.0850434	927.541	38.3628
KIT	468, 642	31.4854	29	0.166457	552.105	118.143
FOXA1	144, 176	19.1075	16	0.227729	189.753	47.9715	17-169, Fork_head_N;
FOXA1	237, 274	56.4883	22	0.27597	254.552	8.2843
RUNX1	80, 112	49.7883	19	0.253362	94.4594	8.79168
RUNX1	162, 239	27.1243	23	0.221023	216.062	43.5789
ZBTB20	190, 248	21.3201	16	0.222053	218.05	74.8622
ZBTB20	345, 504	9.63377	26	0.422109	424.598	197.37
ZBTB20	681, 714	57.2816	19	0.154739	693.181	10.5112
LZTR1	68, 163	35.0915	17	0.136894	109.73	32.7595	77-126, Kelch_3;
LZTR1	243, 324	34.179	17	0.138425	274.908	36.1491
LZTR1	394, 478	20.2147	16	0.116741	425.136	88.2991	433-573, BTB;
LZTR1	571, 723	20.4411	16	0.140687	653.09	79.3699
EME2	41, 72	32.1315	15	0.481186	72.0357	14.69
HHIPL1	94, 242	31.4357	22	0.326016	166.75	57.9811	22-186, Folate_rec;
HRAS	11, 13	78.0305	18	0.378712	12.4133	0.600912
HRAS	61, 61	114.214	22	0.494538	60.9148	0.410545
ZNF485	143, 318	8.20381	18	0.469283	230.873	99.002	229-253, H9KID0.1;
CD209	233, 357	23.5322	22	0.30433	296.074	41.3503	273-379, B6IDE5.1;
NPTX1	162, 263	15.8407	17	0.43099	199.578	56.602
JUB	279, 465	14.8082	19	0.396512	374.351	58.3371	338-394, LIM;
TMEM175	128, 260	20.447	19	0.317148	195.213	53.752
PCNXL2	122, 232	40.233	18	0.0625311	195.442	77.3149
PCNXL2	446, 585	60.7567	26	0.0704046	496.477	63.455
PCNXL2	835, 1037	47.78	24	0.0734657	929.309	91.2591
PCNXL2	1244, 1351	55.6641	24	0.0656922	1311.96	75.1336
PCNXL2	1672, 1799	52.5329	21	0.0859726	1737.92	61.5435	1615-1845, Pecanex_C;
PCNXL2	1869, 2041	46.8083	26	0.082427	1906.55	125.816
TNRC18	577, 734	54.4634	19	0.0881242	655.838	44.6773
TNRC18	1477, 1585	50.4528	17	0.0833165	1541.49	46.4904
TNRC18	1689, 1820	46.3184	17	0.0729262	1757.64	62.0824
TNRC18	1951, 2133	36.6782	16	0.0696625	2040.6	104.205
TNRC18	2155, 2355	45.5912	18	0.073811	2254.9	75.2565
TNRC18	2677, 2830	50.9313	19	0.0934898	2728.09	61.2965
PPARGC1B	103, 320	32.956	26	0.341163	209.387	86.9202
PPARGC1B	614, 865	34.2487	28	0.268817	735.101	87.4633
USP42	324, 533	16.7149	17	0.195551	499.585	172.069
USP42	82, 299	25.5229	18	0.145704	187.364	92.9189	110-409, A0DID2.1;
USP42	760, 779	58.483	15	0.186699	776.437	6.95198
SYT15	63, 136	34.7762	22	0.277971	98.7928	26.2324
B4GALT2	173, 336	9.0233	18	0.45766	258.551	68.2473	235-313, Glyco_transf_7C;
CHEK2	77, 210	15.2859	21	0.248771	170.053	88.946
CHEK2	247, 433	20.6784	26	0.379799	342.363	80.9462	220-486, Pkinase;
FCN1	218, 293	30.522	23	0.293399	253.148	24.4008	114-326, Fibrinogen_C;
POM121	906, 985	34.0145	17	0.223968	991.525	51.3268
POM121	993, 1087	46.5546	22	0.219166	1016	43.3713
POM121	303, 473	34.2321	19	0.216548	372.627	53.7092	316-553, POM121;
UNC5A	364, 529	25.2677	20	0.253101	458.155	80.9333	439-541, H3IDA7.1;
UNC5A	649, 815	24.9048	20	0.197063	723.74	63.1631
UNC5A	143, 305	16.5019	16	0.235132	254.998	107.06	149-239, I-set;
UNC5D	39, 89	54.547	21	0.0632888	70.4222	17.4039
UNC5D	224, 268	49.9121	17	0.0923979	242.79	14.8339	159-249, I-set;
UNC5D	355, 438	47.2395	21	0.0792544	395.04	29.4883
UNC5D	653, 704	43.7992	18	0.0706349	678.398	28.5866
UNC5D	832, 922	57.6684	27	0.0634409	874.531	35.3811	859-935, Death;
BTNL8	96, 209	30.67	29	0.297984	166.036	52.2739
MAP1S	853, 1025	25.1527	18	0.134619	940.024	75.2465
MAP1S	46, 253	32.7219	24	0.204539	152.881	75.6842
PCDHGA7	682, 745	47.6652	20	0.128438	710.859	26.247
PCDHGA7	585, 646	35.1052	15	0.102818	613.396	28.8007	578-665, Cadherin;
PCDHGA7	131, 186	34.7455	15	0.102067	153.304	31.265	138-233, Cadherin;
PCDHGA7	268, 380	8.09527	15	0.384349	336.684	212.372	247-338, Cadherin;
DNER	151, 259	34.4625	22	0.125889	200.906	46.4722
DNER	499, 560	43.7277	22	0.108477	536.586	31.729	509-539, F7HID4.1;
DNER	663, 730	47.8817	21	0.195073	692.061	18.4247
CR1	162, 335	41.5354	22	0.0753636	205.389	85.8458	238-293, Sushi;
CR1	758, 917	70.5146	32	0.110439	845.072	53.256	815-866, Sushi;
CR1	1169, 1292	40.6319	19	0.0961672	1250.67	86.5601	1197-1253, Sushi;
CR1	1341, 1444	64.9936	25	0.0888466	1386.8	52.736
CR1	1719, 1839	73.8003	30	0.107616	1759.91	55.3489	1774-1840, Sushi;
CR1	1885, 2018	48.42	19	0.0782008	1939.69	40.1688	1909-1965, Sushi;
TP53	33, 39	106.604	28	0.0102579	35.575	3.01739
TP53	103, 115	124.281	47	0.0193741	109.489	10.6666
TP53	121, 127	183.439	53	0.0252051	127.383	4.15751
TP53	130, 138	225.552	67	0.0258516	132.167	4.66075
TP53	139, 144	135.137	39	0.0154091	141.5	4.61114
TP53	146, 159	306.155	119	0.0549256	156.854	11.1586
TP53	164, 187	802.307	262	0.13326	174.291	6.41128
TP53	192, 201	414.968	136	0.0576442	197.728	6.37378
TP53	203, 216	503.062	163	0.0724386	209.271	6.18064
TP53	218, 222	135.498	44	0.0251419	215.793	5.22221
TP53	231, 240	234.606	78	0.0522526	240.571	5.34889
TP53	241, 255	541.287	172	0.0678025	244.667	5.05185
TP53	256, 260	72.2182	18	0.00711826	257.656	2.58828
TP53	262, 265	45.2637	15	0.0241973	268.309	3.9389
TP53	266, 279	887.987	271	0.11528	273.437	4.27513
TP53	280, 289	387.67	120	0.0604796	280.776	5.15445
TP53	330, 335	87.3037	25	0.00946353	333.573	3.92072
TP53	336, 344	157.188	45	0.0153429	339.411	3.67746
CDHR5	506, 687	24.082	22	0.216761	590.833	94.9661
CDHR5	75, 209	27.1139	16	0.191836	146.965	40.1044
OTOF	864, 1054	54.8119	28	0.0758154	950.354	94.6543
OTOF	1060, 1169	36.4775	18	0.0671843	1157	92.4163
OTOF	1232, 1323	29.6022	15	0.0752336	1260.96	105.377
OTOF	1548, 1761	46.9269	27	0.117632	1666.57	115.398
OTOF	1814, 1925	39.1751	16	0.0727417	1863.36	58.1368
OTOF	71, 220	53.2501	25	0.0782607	142.848	80.2187
OTOF	408, 502	58.8837	20	0.0892584	456.449	29.1401	419-513, F7IDY5.1;
PCDHGA9	32, 218	46.1928	35	0.286555	148.342	72.4376
PCDHGA9	608, 729	26.8408	17	0.122435	655.516	53.54
ZNF750	14, 96	33.6638	18	0.154655	61.3815	33.9984
ZNF750	250, 351	23.5249	18	0.133893	309.857	69.29
OBSCN	495, 682	43.9145	22	0.0468089	738.009	394.779	514-600, fn3;
OBSCN	998, 1140	71.5728	20	0.0233422	1104.94	73.713
OBSCN	1155, 1274	73.4489	19	0.0235345	1193.4	56.7206	1168-1250, I-set;
OBSCN	1373, 1457	74.9646	18	0.0222872	1415.67	42.3665	1352-1430, I-set;
OBSCN	2262, 2344	76.2361	17	0.0244477	2295.27	25.8509	2290-2374, I-set;
OBSCN	2395, 2556	62.5065	19	0.0252177	2446.31	105.475	2469-2556, I-set;
OBSCN	2573, 2735	51.0422	18	0.025589	2615.13	174.352	2647-2732, I-set;
OBSCN	2892, 3012	62.8428	16	0.0214451	2955.72	49.1212	2916-3000, I-set;
OBSCN	3136, 3292	69.0979	19	0.0208468	3201.34	61.0112	3185-3269, I-set;
OBSCN	3397, 3514	83.4779	21	0.0204027	3457.35	41.7761	3450-3534, I-set;
OBSCN	3635, 3791	82.7801	23	0.0175938	3694.23	55.2761
OBSCN	3954, 4098	65.2572	17	0.0188912	4033.43	52.4062	3979-4065, I-set;
OBSCN	4143, 4286	52.5446	16	0.021544	4178.15	102.484	4159-4246, I-set;
OBSCN	4515, 4516	100.472	15	0.0282404	4516.74	3.73233
OBSCN	4835, 4997	65.7028	19	0.0232805	4916.59	89.544	4898-4988, I-set;
OBSCN	5107, 5215	65.4261	17	0.0219182	5144.67	56.34	5126-5216, I-set;
OBSCN	5622, 5817	57.9662	19	0.0212317	5732.7	126.683	5697-5876, G4TEE5.1;
OBSCN	5931, 6011	86.2526	19	0.0242802	5964.75	23.7451
OBSCN	6068, 6230	60.2821	17	0.0182842	6132.86	79.9352	6108-6199, I-set;
OBSCN	6600, 6727	74.967	20	0.020399	6675.11	59.7379	6468-6721, Pkinase;
OBSCN	6995, 7156	73.0513	20	0.0200249	7077.95	48.3779
RASIP1	601, 794	15.843	23	0.389289	680.817	176.727
RASIP1	830, 958	24.0751	16	0.24146	884.303	60.4344
SGK223	34, 272	56.6777	34	0.624577	146.126	80.6831
C15orf39	817, 1027	23.0713	17	0.229195	913.844	63.9761
TBX3	70, 129	35.4954	16	0.144566	113.806	25.7083
TBX3	151, 224	28.8922	15	0.134032	180.378	36.6708
TBX3	280, 418	18.8869	27	0.258735	330.834	140.602	323-413, TBX;
CTNND1	403, 472	34.5585	16	0.137298	435.854	37.2758
CTNND1	682, 788	39.5386	19	0.133543	738.183	32.3459	701-739, Arm;
SNED1	516, 1132	23.2039	48	0.496383	829.373	291.796	795-825, F7HID4.1;
SNED1	1164, 1408	30.2947	21	0.177889	1275.55	89.0833
BTBD11	624, 741	55.1462	32	0.186183	682.059	69.4546	608-718, H3IDJ8.1;
BTBD11	769, 980	46.0215	43	0.255123	815.098	128.35
BTBD11	357, 473	45.5509	21	0.141951	416.075	31.8848
ZHX2	674, 790	26.0465	17	0.128132	732.285	51.3601
ZHX2	38, 127	33.529	18	0.117917	84.9443	37.5866
ZHX2	179, 258	41.3516	19	0.177071	213.424	29.3535
DHX57	261, 474	37.111	24	0.14389	375.883	97.2651	243-419, RWD;
DHX57	564, 806	37.3244	23	0.142836	686.231	89.0244	547-709, B4JID8.1;
DHX57	902, 1235	35.8508	32	0.198391	1073.33	149.072	1035-1133, E9BQT0.1;
BMP2K	288, 431	27.8759	17	0.184557	366.086	80.0906
BMP2K	918, 1100	29.1526	18	0.186711	1006.84	60.2988	892-1161, BMP2K_C;
ING1	339, 378	31.2975	19	0.293289	349.221	26.1254	355-402, F7IDR1.1;
MARK3	63, 197	21.3185	16	0.182975	136.193	65.0439	56-307, Pkinase;
MARK3	386, 544	23.8954	18	0.214117	475.963	65.1907
KDR	328, 400	49.5084	21	0.0659607	358.224	45.129	333-417, I-set;
KDR	749, 804	52.8627	19	0.0627025	770.607	27.5297
KDR	921, 992	49.3124	19	0.0590889	966.209	34.2208	834-1160, B4IDX4.1;
KDR	1022, 1117	69.7893	38	0.0837438	1042.95	75.1849	834-1160, B4IDX4.1;
KDR	1166, 1319	57.6717	32	0.0930404	1236.31	73.0607
SF3B1	847, 959	38.7164	19	0.0994483	915.345	55.7267
SF3B1	34, 185	28.7381	16	0.106983	122.974	75.3387
SF3B1	576, 781	60.6785	35	0.22003	682.453	65.2878
SALL1	28, 85	52.6193	19	0.0895392	63.902	26.1315
SALL1	114, 161	43.0623	18	0.0541034	132.269	43.3853
SALL1	244, 322	41.0995	23	0.0651371	294.641	83.3093
SALL1	422, 483	69.7909	25	0.0729443	455.464	23.1823
SALL1	540, 599	54.1156	20	0.0467054	577.351	25.7581
SALL1	691, 818	61.9051	31	0.0852471	760.351	58.7585
SALL1	1050, 1194	54.7636	28	0.0680788	1120.66	55.5749
TBL1XR1	119, 181	26.9062	17	0.179881	147.35	35.4899
TBL1XR1	302, 394	13.0188	15	0.189434	352.563	81.6727	339-377, G4THB9.1;
SGK1	1, 59	32.8673	20	0.372643	29.0662	21.1089
TDG	167, 339	8.47529	21	0.508496	243.551	89.2668	125-293, UDG;
PPIG	202, 383	30.9942	27	0.253141	284.971	77.6338
PPIG	510, 614	25.658	15	0.158117	563.281	43.8212
ZMIZ1	659, 860	23.8366	22	0.175616	762.822	124.623	738-787, zf-MIZ;
ZMIZ1	280, 447	14.0462	20	0.350351	361.774	202.243
KIAA1211	591, 678	28.1945	16	0.106014	679.416	71.0228
KIAA1211	694, 812	46.8824	26	0.110777	724.384	65.4953
KIAA1211	396, 544	31.4395	18	0.086093	466.867	72.4426
KIAA1211	1101, 1195	34.0662	16	0.0857098	1137.07	42.3115
KIAA1211	109, 229	25.5488	16	0.10173	169.469	91.3178	44-173, DUF4592;
PPP2R1A	237, 275	48.7056	18	0.146809	258.173	12.6243
PPP2R1A	167, 183	98.2472	28	0.259824	179.123	5.40365	166-196, H9IDD5.1;
PPP2R1A	391, 490	20.594	16	0.106892	438.976	53.8143
VARS	419, 571	39.4622	20	0.225278	488.075	55.435	308-939, tRNA-synt_1;
GPRIN2	352, 453	31.2919	29	0.234729	402.665	41.9354	346-458, GRIN_C;
GPRIN2	39, 126	30.4187	23	0.201397	81.8742	40.4436
ECM1	160, 262	22.1857	20	0.262056	200.234	61.319	1-540, ECM1;
ECM1	336, 459	20.3884	17	0.221099	400.336	51.1482
MAP7	73, 162	30.1268	15	0.204642	109.952	31.2648
MAP7	428, 604	36.459	28	0.328929	516.75	62.2772	456-625, MAP7;
CRIPAK	133, 167	45.4976	19	0.20984	150.893	12.5154
CRIPAK	257, 312	27.7415	15	0.110934	284.041	20.2039
MAP2K4	224, 306	31.9766	24	0.246904	271.925	34.8696	102-367, Pkinase;
ANKRD12	95, 241	30.6068	17	0.114247	188.964	126.05
ANKRD12	313, 476	31.4081	16	0.0714629	398.813	101.33
ANKRD12	537, 812	77.6405	41	0.19522	696.457	88.2567
ANKRD12	843, 961	32.39	17	0.0818263	848.947	99.0436
ANKRD12	1154, 1342	28.2801	18	0.0871316	1252.68	158.403
ZNF814	320, 324	74.4769	16	0.229631	322.993	3.04579
ZNF814	664, 808	28.2844	20	0.222439	732.392	62.7441	730-755, zf-H2C2_2;
VEPH1	358, 507	16.8314	16	0.165099	419.023	104.64
VEPH1	185, 266	31.6216	15	0.137223	227.372	29.314
ZBTB7C	110, 193	47.9806	23	0.28272	143.109	21.9103
ZBTB7C	265, 423	13.1848	23	0.275733	293.12	122.534
ZBTB7B	222, 319	14.5563	18	0.27195	280.723	90.6404
ZBTB7B	3, 99	27.0768	18	0.160948	51.9425	32.1369	24-145, BTB;
SPOP	131, 140	80.6994	24	0.285273	133.85	3.10814	38-163, MATH;
TP53BP1	548, 773	40.4283	26	0.103307	673.21	141.049
TP53BP1	819, 1049	34.9716	23	0.111465	960.46	152.89
TP53BP1	1128, 1343	36.4556	22	0.102346	1261.79	131.667
TP53BP1	1430, 1578	34.6613	17	0.0810348	1521.62	84.2678	1483-1604, 53-BP1_Tudor;
TP53BP1	1733, 1914	45.589	20	0.122324	1816.11	59.4457
PCDHA2	22, 82	37.6789	15	0.0867748	58.2623	25.9045	29-112, Cadherin_2;
PCDHA2	144, 238	34.0366	18	0.0928667	187.317	50.5018
PCDHA2	456, 522	57.2651	22	0.13087	488.698	18.4236
PCDHA2	548, 582	46.6381	15	0.0994768	567.203	12.8834
PCDHA2	668, 763	54.788	27	0.151167	717.994	30.7159
PCDHA3	61, 103	31.1477	15	0.121725	78.1216	45.119	29-112, Cadherin_2;
PCDHA3	6, 50	42.5118	15	0.0695282	37.5424	16.0181
PCDHA3	338, 419	35.5276	17	0.072475	383.212	39.0058	356-446, Cadherin;
PCDHA3	469, 497	49.5315	15	0.0940197	485.982	11.6488
PCDHA3	538, 578	34.5945	16	0.0881834	539.405	36.6063
PCDHA3	609, 657	41.2339	15	0.0795244	624.733	19.5256
PCDHA3	166, 323	41.2619	26	0.111614	242.893	62.347
CASP8	325, 409	18.3675	18	0.201418	365.661	62.7615	234-476, Peptidase_C14;
CASP8	418, 471	34.6351	18	0.112765	444.156	16.9092	234-476, Peptidase_C14;
CASP8	52, 78	32.2393	15	0.129092	70.702	19.6075	3-86, DED;
CASP8	94, 128	34.1238	18	0.133318	100.633	24.7505
ATXN1	322, 379	17.3432	18	0.224721	366.584	121.335
ATXN1	139, 248	30.4546	21	0.13802	218.858	67.6722
ATXN1	619, 713	23.4608	16	0.145089	651.451	66.1376	574-688, AXH;
PARG	507, 900	15.3119	21	0.710055	702.263	104.13	577-912, PARG_cat;
DNAH12	22, 504	87.6852	49	0.254989	260.809	139.66
DNAH12	905, 1210	28.1587	15	0.0937331	1017.27	157.27	674-1092, E9BRG7.1;
DNAH12	2244, 2719	19.4479	16	0.144978	2465.63	326.922	2377-3089, E9BGH1.1;
AKT2	289, 429	21.0387	20	0.279986	359.979	51.6944	152-409, Pkinase;
PCDHGB5	490, 580	43.5729	21	0.248716	544.098	38.0468	453-549, Cadherin;
PCDHGB5	197, 391	19.4887	20	0.159517	287.96	122.593	247-334, Cadherin;
UGP2	169, 369	10.2445	17	0.335179	275.725	89.925	54-473, UDPGP;
UGP2	16, 101	23.9767	15	0.317675	55.3994	28.7928
RREB1	893, 1113	17.8229	26	0.256873	967.405	331.742
RREB1	120, 611	49.5144	55	0.287932	369.24	212.775
RREB1	1444, 1592	35.4187	17	0.106275	1493.7	56.8466
AHCYL1	202, 415	14.1665	25	0.503637	319.768	90.8516	103-529, AdoHcyase;
CCDC102A	96, 96	103.838	17	0.484437	95.8879	0.474746
INPP4B	633, 785	14.9829	16	0.224114	710.902	132.307
INPP4B	806, 906	36.7519	19	0.150043	845.406	36.9508
INPP4B	215, 285	24.922	16	0.187782	245.297	72.9281
WHSC1L1	310, 518	16.8045	18	0.195085	412.809	214.73
WHSC1L1	574, 714	31.3916	15	0.10653	649.465	50.2876
WHSC1L1	764, 910	29.0932	17	0.135905	810.433	88.6249
WHSC1L1	1062, 1222	35.1145	16	0.132312	1142.63	47.4123
ZNF781	106, 223	20.2077	23	0.406541	146.955	43.3487
MYB	257, 449	14.7556	23	0.354931	365.797	119.363
SPAG9	1068, 1252	28.0175	18	0.156855	1142.72	79.8021
SPAG9	271, 477	21.7406	16	0.13812	360.744	110.069
SPAG9	568, 918	9.87161	23	0.422637	736.036	320.001
ZNF362	121, 205	19.0852	15	0.399762	179.279	35.6031
CACNG3	117, 149	31.1137	18	0.191125	134.065	19.4961	6-196, PMP22_Claudin;
CACNG3	207, 255	46.7368	31	0.195687	230.232	22.8468
KLHL5	260, 404	23.9955	19	0.237949	328.003	72.5759	322-423, BACK;
RAE1	186, 280	11.2839	16	0.392084	234.587	66.336
KLHL1	221, 292	52.2588	25	0.0936975	260.831	27.0243	202-309, BTB;
KLHL1	330, 403	39.1519	21	0.0957647	358.941	40.4351
KLHL1	98, 183	40.0554	24	0.112702	139.595	49.0989
KLHL1	541, 611	50.8716	23	0.110895	581.744	26.4255	542-587, Kelch_1;
KLHL8	262, 402	24.3208	19	0.253628	337.434	55.7085	316-353, Kelch_1;
CAB39L	60, 214	15.7064	22	0.580679	138.306	47.1242	4-334, Mo25;
NFAT5	842, 986	27.6741	16	0.114636	868.319	87.7194
NFAT5	1164, 1381	29.4054	19	0.120741	1274.45	98.8945
NFAT5	111, 263	24.9853	15	0.126366	187.803	101.979
CCDC82	6, 75	25.5147	16	0.267997	46.3302	33.9705
ROBO3	195, 509	53.9226	44	0.343647	349.128	138.505	347-441, I-set;
ROBO3	957, 1192	30.4835	20	0.150832	1083.31	95.3179
DDX5	453, 556	28.0391	20	0.241349	505.862	41.3066	498-532, P68HR;
FAT1	223, 419	60.6376	25	0.0443222	313.612	147.564
FAT1	460, 567	50.6588	16	0.0206209	535.972	62.2163	468-560, Cadherin;
FAT1	785, 866	56.5972	15	0.0234243	817.14	29.2136
FAT1	1096, 1192	53.7433	16	0.02236	1125.57	53.8083	1144-1236, Cadherin;
FAT1	1313, 1427	55.4695	17	0.0230153	1347.88	55.1151	1363-1447, Cadherin;
FAT1	1537, 1689	61.4985	20	0.024927	1599.43	70.0127	1567-1658, Cadherin;
FAT1	1915, 2049	69.389	21	0.0279104	1997.35	53.3269
FAT1	2149, 2225	63.2215	17	0.0242861	2189.8	37.7497
FAT1	2413, 2533	68.2428	22	0.0301545	2472.89	73.9656	2395-2483, Cadherin;
FAT1	2579, 2638	71.3979	17	0.026179	2606.2	21.2353	2601-2694, Cadherin;
FAT1	2671, 2775	65.0731	19	0.0265567	2713.45	49.5537
FAT1	2825, 2943	56.7869	18	0.0285194	2878.92	68.5709	2814-2909, Cadherin;
FAT1	2971, 3136	75.3015	26	0.0287991	3046.32	86.5715	3028-3116, Cadherin;
FAT1	3207, 3333	54.3416	18	0.0230186	3264.34	78.2907	3235-3326, Cadherin;
FAT1	3388, 3462	63.4395	16	0.0265054	3430.08	23.6066	3340-3431, Cadherin;
FAT1	3597, 3707	49.2421	16	0.0208411	3629.04	71.7366
FAT1	3818, 3954	44.189	15	0.0217525	3888.91	83.7135	3859-3985, Laminin_G_2;
FAT1	3982, 4147	60.8676	21	0.0256565	4074.09	82.2001
FAT1	4347, 4519	72.378	25	0.0273311	4418.71	79.3771
GRB7	160, 290	21.6801	20	0.267778	224.63	57.0343
CPS1	23, 116	52.1923	21	0.0639316	63.847	36.2882	44-184, CPSase_sm_chain;
CPS1	365, 443	44.1832	20	0.058746	426.292	56.7733
CPS1	464, 542	33.4635	15	0.0592787	476.482	54.9215	421-541, CPSase_L_chain;
CPS1	604, 656	45.0775	15	0.0592328	632.904	24.2409	546-750, E2JE28.1;
CPS1	711, 787	48.064	18	0.0489866	744.497	34.0492	546-750, E2JE28.1;
CPS1	1004, 1207	65.0919	36	0.108915	1114.56	75.3923	1088-1291, H9ABT9.1;
CPS1	1213, 1321	48.788	22	0.0558546	1264.55	52.5156	1088-1291, H9ABT9.1;
HLA-C	113, 167	20.9072	15	0.240599	139.983	32.7341
PABPC1	206, 345	32.9993	24	0.327167	269.62	47.8689
PABPC1	414, 545	27.6845	19	0.246915	481.834	39.577
HLA-A	23, 114	23.3388	22	0.301882	66.5795	41.2577	25-203, MHC_I;
CHD4	181, 347	40.3452	20	0.0649427	259.111	83.1988
CHD4	569, 659	47.3975	18	0.0584529	616.71	45.4161
CHD4	714, 820	42.837	21	0.0647283	765.732	92.6148	729-1025, C4G4W5.1;
CHD4	945, 1016	68.8581	22	0.0857837	974.954	26.1701	729-1025, C4G4W5.1;
CHD4	1087, 1138	54.8685	17	0.0642351	1115.82	25.4215
CHD4	1287, 1376	59.3211	21	0.0757038	1333.19	35.1552
CHD4	1510, 1675	40.5056	24	0.093465	1598.73	130.46
FAT2	4, 152	82.1544	26	0.0482513	79.4359	47.5119
FAT2	331, 459	58.6632	20	0.0329393	405.728	80.9443
FAT2	557, 600	70.1855	16	0.0307884	577.95	15.8124
FAT2	920, 1076	47.36	18	0.0314099	996.628	115.574	930-1020, Cadherin;
FAT2	1109, 1315	62.6185	22	0.0406789	1211.67	84.7029	1142-1233, Cadherin;
FAT2	1331, 1445	48.9616	17	0.0299097	1403.74	88.8453	1354-1437, Cadherin;
FAT2	1469, 1635	71.0651	25	0.0407392	1544.27	91.5418
FAT2	1786, 1884	63.2579	18	0.0353093	1829.34	39.0086	1774-1863, Cadherin;
FAT2	2085, 2196	52.9545	17	0.0268143	2115.6	63.4307	2075-2164, Cadherin;
FAT2	2603, 2745	47.8944	19	0.0250241	2675.42	129.937	2590-2682, Cadherin;
FAT2	2847, 2974	63.3381	21	0.0363023	2927.81	71.003
FAT2	3202, 3337	45.4327	17	0.0252974	3247.59	102.921	3223-3312, Cadherin;
FAT2	3448, 3565	63.5417	20	0.0353615	3502.72	58.3302	3431-3522, Cadherin;
FAT2	3785, 3934	40.5178	16	0.0294653	3867.64	126.566	3800-3921, Laminin_G_2;
FAT2	3978, 4167	48.738	19	0.0320631	4076.11	117.686
ASXL1	480, 906	30.6492	49	0.356955	706.155	295.186
ASXL1	997, 1186	34.7736	22	0.110234	1095.58	112.313
ASXL1	1246, 1336	42.6387	17	0.0884272	1299.67	37.9533
ASXL1	42, 229	46.3119	26	0.120971	139.286	76.1446
CHD8	284, 531	35.1501	19	0.080971	406.8	136.449
CHD8	599, 796	46.7118	20	0.0765005	700.332	65.4083	642-704, Chromo;
CHD8	1170, 1419	63.0351	30	0.147324	1306.55	102.14
CHD8	1448, 1605	31.2724	17	0.0878214	1444.74	123.77
CHD8	2244, 2386	43.8188	16	0.0771126	2315.19	45.8957	2308-2353, BRK;
CHD8	1727, 1930	45.7089	21	0.104002	1806.32	89.4225
THBS4	6, 101	35.9118	17	0.137947	55.748	30.6159
THBS4	487, 680	19.5835	26	0.285719	598.914	167.333	555-590, TSP_3;
ASXL2	1010, 1239	29.9111	23	0.138124	1129.06	138.774
ASXL2	582, 742	28.6079	17	0.0874305	670.374	92.5906
ASXL2	192, 505	51.1952	48	0.346576	332.117	177.436	249-381, F7IDY8.1;
THBS1	417, 755	17.9138	46	0.431484	591.295	298.139
THBS1	974, 1149	54.2265	31	0.184171	1063.39	51.6603	972-1170, TSP_C;
PIK3R1	45, 102	109.719	57	0.154578	74.9675	38.8445
PIK3R1	329, 360	39.5719	15	0.055084	354.397	16.1527	333-408, SH2;
PIK3R1	376, 399	40.6614	16	0.0509681	375.299	19.2673	333-408, SH2;
PIK3R1	457, 472	59.7135	16	0.0571548	460.906	5.26677
PIK3R1	576, 582	76.8007	18	0.0634363	578.606	3.25156
PIK3R1	617, 670	35.5777	17	0.0455257	639.304	32.6504
C9orf102	367, 557	8.28719	22	0.461829	453.973	131.617	137-473, G4T6D8.1;
TPP2	596, 717	30.2661	16	0.102958	667.938	63.3345
TPP2	417, 549	18.6926	16	0.13824	495.575	148.353	39-509, C6HID4.1;
TPP2	197, 329	33.1618	17	0.105494	254.921	54.389	39-509, C6HID4.1;
RAB3GAP1	41, 149	34.2808	18	0.1747	83.5168	45.6275
RAB3GAP1	190, 325	23.5124	18	0.177553	242.058	93.1179
RAB3GAP1	681, 898	26.2986	22	0.19079	795.523	85.9191
PGM5	88, 98	84.3575	24	0.26517	97.5687	5.65459	19-163, G4YID5.1;
PGM5	456, 522	26.4219	16	0.159758	478.21	37.2519
SLC26A3	273, 391	21.5926	18	0.144718	331.084	85.7478	193-471, Sulfate_transp;
SLC26A3	131, 247	39.1767	24	0.133263	183.681	45.4937
SLC26A3	495, 613	34.4839	24	0.215086	557.891	62.514	526-716, STAS;
PLEC	1285, 1347	71.0127	16	0.0332201	1317.24	16.0163
PLEC	1963, 2045	68.4585	19	0.0291193	2026.76	35.4061
PLEC	2100, 2124	115.941	22	0.0520973	2109.99	7.47561
PLEC	2310, 2385	62.7362	16	0.0296027	2340.97	21.3257
PLEC	2658, 2776	49.8187	17	0.0278535	2746.97	86.7581
PLEC	2791, 2921	58.5324	18	0.0267166	2839.43	60.8252	2826-2870, H2RID3.1;
PLEC	2951, 3039	62.6358	18	0.0256403	3003.98	47.0338
PLEC	3439, 3549	41.7269	16	0.0429325	3495.22	134.096	3485-3528, H2RID3.1;
PLEC	3595, 3715	56.6461	18	0.025626	3677.66	63.176
PLEC	3838, 4066	55.8904	22	0.030404	3936.01	127.962	3934-3978, Plectin;
PLEC	4192, 4352	65.1785	21	0.0348409	4277.89	63.5165
PLEC	4361, 4461	78.1829	22	0.0295533	4409.35	36.426
PLEC	4499, 4624	60.7915	20	0.0334793	4548.69	73.2959	4522-4566, H2RID3.1;
TMPRSS6	270, 361	27.2406	15	0.197698	316.623	41.5626
SLC26A8	656, 740	36.6225	22	0.185022	727.071	59.1442	544-791, STAS;
SLC26A8	18, 178	34.9216	22	0.201411	94.9462	49.2835	77-162, Sulfate_tra_GLY;
RHOA	22, 76	28.5012	24	0.47706	47.1367	17.2594	7-180, Ras;
SEZ6L2	553, 664	18.9541	15	0.178061	614.282	94.9853	527-635, B4IDH3.1;
SEZ6L2	725, 836	27.0043	16	0.130253	769.737	53.3741	771-828, Sushi;
SEZ6L2	65, 258	38.6715	34	0.199442	159.808	96.071
TAF5	301, 452	20.0129	15	0.233743	390.382	65.0993
TAF5	558, 751	15.6186	15	0.233222	648.158	85.9084
LRIG1	96, 163	38.6499	16	0.100529	119.455	30.0838
LRIG1	266, 389	30.4724	18	0.105188	324.723	71.0275	307-367, E9BGR2.1;
LRIG1	535, 627	32.8225	16	0.0932907	582.949	46.1398	495-595, I-set;
LRIG1	24, 26	139.177	26	0.221452	24.5925	1.76417
CDC27	28, 130	31.3154	16	0.169123	82.3256	30.0035	17-95, Apc3;
CDC27	177, 301	28.2708	22	0.155432	204.359	75.6667
CDC27	531, 566	47.0606	16	0.1918	547.803	11.9186
SDC1	106, 190	12.96	18	0.357205	161.385	51.9673
VAV3	275, 386	10.0768	19	0.378215	324.786	195.692	196-370, G4TMD6.1;
VAV3	38, 123	34.2482	17	0.112735	82.5734	34.5368
VAV3	598, 741	27.4233	20	0.148998	678.534	73.095
PDZD7	101, 272	10.1356	20	0.42936	191.41	111.069
TOX4	223, 452	6.38657	18	0.452964	337.908	156.422
ZNF385B	115, 205	24.7734	23	0.238338	156.914	54.3412	157-181, zf-met;
ZNF385B	1, 69	33.6272	20	0.219097	34.0677	23.8609	33-58, zf-met;
EPHA2	302, 500	33.818	25	0.225064	417.012	74.3698	330-424, fn3;
EPHA2	541, 680	26.6438	18	0.14743	633.094	78.0664
RINL	256, 408	6.92409	16	0.462264	339.163	95.1573	293-397, VPS9;
NOM1	139, 295	23.9536	18	0.157669	228.305	74.3602
NOM1	320, 460	25.9551	18	0.136782	392.017	68.8308	362-559, G4T4T8.1;
NOM1	649, 828	27.8287	20	0.18476	738.353	59.4843	655-761, G4T4T8.1;
MUC5B	682, 682	131.261	18	0.0378348	681.947	1.56399
MUC5B	796, 1040	34.5184	21	0.0927345	928.099	436.88	895-1043, VWD;
MUC5B	1208, 1364	60.0531	17	0.0258871	1285.16	40.2709
MUC5B	1464, 1632	52.1007	18	0.0207269	1537.58	114.095	1508-1598, Mucin2_WxxW;
MUC5B	1827, 1955	75.0402	22	0.0285709	1908.82	62.6652
MUC5B	2174, 2315	48.3147	17	0.0200054	2222.55	121.217
MUC5B	2568, 2688	60.0975	17	0.0260518	2607.25	49.0942
MUC5B	2748, 2905	55.7792	16	0.0223566	2830.99	44.3804
MUC5B	3049, 3131	62.9001	17	0.0247447	3081.63	49.2283
MUC5B	3164, 3273	55.7833	16	0.0263697	3190.28	55.8589
MUC5B	3428, 3476	74.1745	17	0.0194407	3452.08	19.3689
MUC5B	3812, 3955	66.0165	22	0.0238887	3851.83	103.024
MUC5B	4042, 4164	66.729	18	0.0275065	4095.21	36.5625
MUC5B	4355, 4388	83.4264	17	0.0300529	4371.91	13.2705
MUC5B	4460, 4575	61.0361	18	0.0293951	4495.53	62.6747
MUC5B	4805, 4865	77.6105	18	0.0325754	4843.23	21.2722
MUC5B	4924, 5049	55.8465	21	0.0381608	4978.75	156.053
MUC5B	5081, 5301	55.0168	20	0.0277893	5160.94	127.168	5075-5238, VWD;
NCOR1	93, 220	62.717	22	0.0660968	158.192	38.7625
NCOR1	461, 627	48.5493	19	0.0734928	542.711	58.0934
NCOR1	967, 1109	39.4738	16	0.0497157	1022.15	68.5228
NCOR1	1435, 1582	54.1274	21	0.0767303	1519.07	59.3954
NCOR1	1713, 1909	65.8469	27	0.0966352	1817.87	60.1747
NCOR1	2211, 2391	43.5847	19	0.0572102	2294.88	72.3889
CCDC105	334, 468	32.0525	30	0.424221	397.643	59.4947
HNRNPM	203, 324	23.9075	17	0.179276	259.209	59.9256	206-275, E9B8U0.1;
HNRNPM	519, 676	22.4334	21	0.267324	557.295	82.8686
HLA-B	98, 159	20.8124	17	0.204874	117.847	36.1986	25-203, MHC_I;
HLA-B	216, 266	27.9181	15	0.198262	242.22	15.4075	210-295, C1-set;
DLC1	617, 866	52.9481	51	0.239259	750.997	203.554
DLC1	272, 367	39.2492	17	0.0630728	334.438	51.7827
DLC1	152, 249	44.8602	22	0.0775484	189.795	72.8834
DLC1	19, 123	59.3604	23	0.0808425	73.0414	35.3238
DLC1	1262, 1333	46.0884	16	0.0651605	1295.63	24.5139
PDILT	11, 76	33.2596	18	0.134806	48.4156	27.0559
PDILT	469, 546	34.0216	20	0.113758	511.486	34.464
PDILT	316, 365	47.1661	24	0.180109	348.13	26.4611	180-365, Thioredoxin_6;
ZFP36L1	42, 129	20.2624	18	0.264332	82.1084	33.1908	1-107, Tis11B_N;
ZFP36L1	154, 245	10.0792	18	0.313609	188.549	70.7179
KIAA1804	430, 534	40.0174	19	0.209173	472.969	37.7301
KIAA1804	270, 371	61.3385	29	0.197354	325.705	32.9358	124-398, B4IDX4.1;
KIAA1804	626, 850	42.0946	41	0.225254	751.724	130.11
TGS1	607, 764	22.7457	18	0.21914	694.299	81.3385
FADS2	182, 291	19.932	17	0.3932	245.213	39.6506	155-418, FA_desaturase;
IDUA	280, 383	14.573	15	0.313538	355.629	92.941	23-543, Glyco_hydro_39;
SEMA3C	392, 495	29.107	19	0.18043	448.197	56.381	54-495, Sema;
SEMA3C	255, 351	18.0422	15	0.138217	306.73	83.1865	54-495, Sema;
SOS1	154, 309	31.3246	16	0.109006	228.107	62.7518	208-389, G4TMD6.1;
SOS1	404, 478	40.7916	16	0.116093	435.417	34.1447
SOS1	1050, 1292	35.3734	25	0.161059	1157.51	89.2153
CCKAR	313, 360	40.7305	19	0.223	336.838	14.4276
MET	187, 238	51.6156	17	0.123176	217.29	22.6589	52-500, Sema;
MET	469, 626	38.1782	21	0.0946859	537.025	78.476	519-562, PSI;
MET	1009, 1148	40.5228	21	0.0836285	1065.07	58.8361	1078-1337, B4IDX4.1;
NKX3-1	171, 226	21.8519	18	0.434847	191.617	17.5291
KIF20B	442, 544	39.5797	16	0.0708139	494.371	48.1695
KIF20B	955, 1043	49.5285	18	0.0851444	994.829	34.601
KIF20B	1700, 1818	34.974	15	0.065696	1763.79	47.126
KIF20B	42, 158	68.3404	27	0.143323	93.6335	38.3301	64-479, E9BBD3.1;
CIC	174, 253	85.1747	28	0.148931	212.412	18.8022
CIC	435, 517	46.9463	19	0.0735705	489.759	47.7522
CIC	896, 1007	37.2267	17	0.0704138	952.011	60.3078
CIC	1221, 1432	32.457	24	0.137925	1323.42	149.978
CIC	1459, 1532	58.4421	20	0.0940881	1497.17	21.8877
MKI67	234, 310	64.423	18	0.0476963	280.383	27.1917
MKI67	1218, 1341	57.568	22	0.0611078	1319.72	81.4999	1246-1357, K167R;
MKI67	1374, 1465	63.5567	19	0.042235	1419.06	31.5225
MKI67	1598, 1698	69.7812	21	0.0488963	1644.11	34.4161	1610-1721, K167R;
MKI67	1948, 2069	52.3493	17	0.0399551	2003.96	48.4064	1976-2087, K167R;
MKI67	2090, 2214	42.9527	18	0.047137	2198.82	101.566	2098-2205, K167R;
MKI67	2258, 2375	67.1813	21	0.0462908	2315.1	33.9352
MKI67	2894, 3007	51.764	17	0.0346935	2966.79	45.7756
MKI67	3030, 3129	48.4087	15	0.0396137	3079.1	41.8662
CNTNAP1	113, 239	31.6791	23	0.142263	245.334	108.741
CNTNAP1	365, 437	46.4243	19	0.115331	378.303	38.4016	389-515, Laminin_G_2;
CNTNAP1	750, 869	37.6014	17	0.101421	807.148	44.6923
CNTNAP1	965, 1065	42.5794	18	0.128702	1018.49	42.9912
VHL	60, 70	50.8091	22	0.0775254	69.5116	6.00761
VHL	71, 78	44.1942	18	0.0874591	72.4129	6.64606
VHL	84, 94	42.7442	22	0.109945	83.4398	10.496
VHL	103, 123	100.356	42	0.156047	113.366	4.88344
VHL	128, 137	33.0012	16	0.0536192	127.494	8.40759	58-213, VHL;
VHL	154, 164	62.3667	22	0.0773731	159.557	4.0051
VHL	183, 190	48.2316	16	0.0613971	187.147	3.40698
ELF3	324, 366	28.934	15	0.226301	341.65	13.3673	272-357, Ets;
AVL9	94, 291	8.53751	15	0.414999	198.157	130.609	16-520, Avl9;
NRAS	61, 61	591.687	139	0.715117	60.9458	1.06692
C9orf66	219, 283	19.4829	15	0.493888	253.278	18.9412
AQP12A	7, 70	25.4834	20	0.666768	37.0934	20.5346	37-238, MIP;
SIN3A	790, 935	32.619	20	0.114757	883.337	86.3547
SIN3A	1055, 1224	35.1445	21	0.116189	1143.52	67.1213
SIN3A	537, 692	28.7066	21	0.126498	603.178	122.028
SIN3A	80, 176	30.9565	16	0.0976328	136.685	61.4535
DNMT3A	359, 440	38.602	19	0.142053	387.823	39.9497
DNMT3A	729, 839	41.1404	28	0.129572	782.086	73.5587
RAD21	506, 596	23.0517	16	0.187506	554.249	45.9245
PLAU	289, 411	17.6867	17	0.298227	352.974	39.8893	179-419, Trypsin;
DMKN	141, 282	10.7601	18	0.396019	214.402	86.6246
RASA1	317, 449	25.661	19	0.13502	387.282	98.3587	351-426, SH2;
RASA1	905, 1019	37.1305	19	0.130081	954.027	38.9065
SBNO1	1084, 1244	23.0601	17	0.201217	1168.63	131.146
SBNO1	1295, 1357	43.433	18	0.0967686	1307.03	41.8438
SBNO1	326, 450	15.9159	17	0.17342	385.927	212.603	253-561, AAA_34;
FAM63B	179, 413	7.48972	15	0.487919	326.522	123.237	272-397, DUF544;
KIAA1984	144, 373	6.33954	20	0.479192	255.887	118.392
PTPRF	524, 639	30.6637	17	0.0748869	579.352	119.994	513-594, fn3;
PTPRF	871, 970	50.2144	19	0.0610838	910.93	37.7735	917-1000, fn3;
PTPRF	1265, 1415	41.7914	21	0.0698321	1322.53	85.4289
PTPRF	1491, 1669	30.2264	19	0.111021	1601.94	138.934	1375-1606, Y_phosphatase;
PTPRF	1721, 1861	49.9439	20	0.0972076	1772.26	48.4528	1664-1897, Y_phosphatase;
DSPP	304, 397	38.7843	17	0.0765561	348.219	46.4801
DSPP	419, 522	28.7618	16	0.0767691	438.921	74.6629
DSPP	1060, 1079	57.541	16	0.102626	1070.55	12.9118
DSPP	1088, 1127	70.4655	23	0.148027	1093.76	18.77
DSPP	1136, 1236	51.9556	23	0.116278	1182.1	34.1222
BRAF	600, 601	2452.04	373	0.778652	600	0.398942
ACTL6B	156, 323	18.8933	24	0.417123	239.153	63.6598	8-426, Actin;
AHNAK2	361, 490	66.3166	21	0.0195216	445.559	86.1493
AHNAK2	655, 775	70.2749	24	0.0245607	703.53	116.069
AHNAK2	902, 975	90.9497	21	0.0234382	944.655	20.8451
AHNAK2	1191, 1250	70.4728	16	0.0202283	1209.75	21.0132
AHNAK2	1631, 1736	49.187	15	0.0191386	1664.9	76.3327
AHNAK2	1739, 1855	83.2946	23	0.0227626	1805.48	45.201
AHNAK2	1868, 1978	72.1044	23	0.0248059	1924.02	94.4991
AHNAK2	2194, 2231	72.9129	15	0.0210876	2205.38	12.5015
AHNAK2	2407, 2535	68.2837	21	0.0169878	2448.1	68.9853
AHNAK2	2548, 2638	77.7328	21	0.0159735	2611.06	47.7354
AHNAK2	2674, 2754	69.2045	18	0.0204448	2697.62	41.1014
AHNAK2	2851, 2951	76.9316	20	0.0204842	2889.52	34.7728
AHNAK2	3123, 3175	83.2667	18	0.0198413	3144.19	14.8072
AHNAK2	3244, 3314	60.432	15	0.016965	3275.71	31.3961
AHNAK2	3629, 3712	79.9825	21	0.0208472	3657.58	41.8419
AHNAK2	3761, 3837	76.3185	19	0.0201366	3804.14	32.9182
AHNAK2	3858, 3915	63.9143	17	0.0195436	3896.76	48.0243
AHNAK2	3933, 3994	72.0166	17	0.0184288	3963.29	27.2911
AHNAK2	4092, 4188	70.1618	18	0.0188365	4140.22	31.6443
AHNAK2	4210, 4309	89.1429	23	0.0206051	4263.72	32.4824
AHNAK2	4341, 4446	65.3648	20	0.0191822	4386.27	80.0077
AHNAK2	4496, 4574	72.447	19	0.017551	4532.25	43.6245
AHNAK2	4594, 4697	64.4327	18	0.018373	4637.39	52.4426
AHNAK2	5196, 5379	73.1159	23	0.0251164	5279.82	70.2474
BAP1	163, 324	36.1628	35	0.262907	243.742	89.9345
BAP1	1, 60	50.9058	23	0.156358	32.9978	23.2695

## Sheet: T3_clusters_and_tumor_type
cancer	gene	cluster	missense mutations	nonsense mutations	synonymous mutations	included in gexp analysis
ACC	AATK	332, 691	7	0	1	yes
ACC	ADNP	938, 1058	1	0	0	no
ACC	AHNAK2	902, 975	1	0	0	no
ACC	AHNAK2	1739, 1855	1	0	1	no
ACC	AHNAK2	1868, 1978	1	0	1	no
ACC	AHNAK2	3858, 3915	2	0	0	no
ACC	AMDHD1	3, 17	10	0	9	yes
ACC	ANGPT4	71, 158	1	0	0	no
ACC	ARAP3	357, 681	1	0	0	no
ACC	ARID5B	372, 511	0	1	0	no
ACC	ATM	597, 749	0	1	0	no
ACC	ATM	2987, 3032	1	0	0	no
ACC	ATXN1	139, 248	4	4	0	yes
ACC	C9orf66	219, 283	3	0	1	no
ACC	CASZ1	1449, 1607	1	0	0	no
ACC	CCDC102A	96, 96	17	0	0	yes
ACC	CCDC150	200, 351	0	3	0	no
ACC	CD209	233, 357	1	0	0	no
ACC	CHD4	181, 347	1	0	0	no
ACC	CHEK2	77, 210	1	1	0	no
ACC	CIC	896, 1007	1	0	0	no
ACC	CLDN23	129, 253	10	0	0	yes
ACC	CPS1	1004, 1207	1	0	0	no
ACC	CRIPAK	133, 167	3	0	10	no
ACC	CRIPAK	257, 312	1	0	3	no
ACC	CSDE1	715, 784	0	1	0	no
ACC	CTNNB1	25, 45	6	0	0	yes
ACC	DHX57	902, 1235	1	0	0	no
ACC	DMKN	141, 282	5	2	0	yes
ACC	DNAH12	22, 504	1	0	0	no
ACC	DSPP	1060, 1079	5	0	2	yes
ACC	DSPP	1088, 1127	0	3	12	no
ACC	EGFR	45, 160	1	0	0	no
ACC	EP300	479, 648	0	1	0	no
ACC	EPHA2	302, 500	1	0	0	no
ACC	ERBB3	40, 623	1	0	0	no
ACC	ERCC2	241, 312	10	0	0	yes
ACC	FAM63B	179, 413	1	0	0	no
ACC	FAT1	2149, 2225	1	0	0	no
ACC	FAT1	2671, 2775	0	1	0	no
ACC	FAT1	2971, 3136	1	0	0	no
ACC	FAT1	3207, 3333	1	0	0	no
ACC	FAT1	3818, 3954	1	0	0	no
ACC	FAT2	1786, 1884	1	0	0	no
ACC	FAT2	3202, 3337	1	0	0	no
ACC	FOXA1	144, 176	1	0	0	no
ACC	GARS	31, 42	19	0	4	yes
ACC	GATA3	108, 158	0	1	0	no
ACC	GATA3	429, 443	1	0	0	no
ACC	GFAP	180, 361	0	1	0	no
ACC	GIGYF2	158, 233	1	0	0	no
ACC	GNPTAB	587, 786	1	0	0	no
ACC	GPRIN2	352, 453	8	0	1	yes
ACC	HLA-A	23, 114	3	0	0	no
ACC	HLA-B	98, 159	2	0	0	no
ACC	HNRNPM	203, 324	1	0	0	no
ACC	HNRNPM	519, 676	4	2	1	yes
ACC	HRNR	1894, 1936	1	1	0	no
ACC	HRNR	1955, 1995	1	0	0	no
ACC	IDUA	280, 383	8	0	0	yes
ACC	INTS7	67, 199	1	0	0	no
ACC	INTS7	562, 832	1	0	0	no
ACC	IRF2	13, 64	1	0	0	no
ACC	IRF2	79, 153	1	0	0	no
ACC	IRX4	176, 230	1	1	0	no
ACC	ITGAL	208, 309	1	0	0	no
ACC	KEAP1	449, 493	1	0	0	no
ACC	KIAA1211	396, 544	1	0	0	no
ACC	KIAA1211	591, 678	0	1	0	no
ACC	KIAA1804	626, 850	1	0	0	no
ACC	KIAA1984	144, 373	4	0	0	no
ACC	KLF5	175, 255	1	0	0	no
ACC	KLHL1	98, 183	1	2	0	no
ACC	KNDC1	346, 492	2	0	4	no
ACC	KNDC1	928, 1111	1	0	0	no
ACC	L1TD1	340, 471	1	0	0	no
ACC	LACTB	5, 5	18	0	0	yes
ACC	LRIG1	24, 26	26	0	0	yes
ACC	MAP7	428, 604	3	0	0	no
ACC	MARK3	63, 197	1	0	0	no
ACC	MED23	45, 170	1	0	0	no
ACC	MED23	314, 479	1	0	0	no
ACC	MED23	1075, 1242	0	1	0	no
ACC	MKI67	234, 310	1	0	0	no
ACC	MKI67	2090, 2214	1	0	1	no
ACC	MLL2	668, 829	1	0	0	no
ACC	MLL2	2311, 2483	0	1	0	no
ACC	MLL2	5381, 5466	1	0	0	no
ACC	MLL3	885, 1002	1	0	0	no
ACC	MLL3	1881, 1977	1	0	0	no
ACC	MLL3	3022, 3177	1	0	0	no
ACC	MLL3	4565, 4714	0	1	0	no
ACC	MLL4	1251, 1463	1	1	0	no
ACC	MLL4	1803, 1891	1	1	0	no
ACC	MSH6	422, 530	0	1	0	no
ACC	MUC17	46, 133	1	0	0	no
ACC	MUC17	975, 1029	1	0	0	no
ACC	MUC17	2368, 2498	1	0	0	no
ACC	MUC5B	682, 682	14	0	0	yes
ACC	MUC5B	2174, 2315	1	0	0	no
ACC	MUC5B	2748, 2905	1	0	0	no
ACC	MUC5B	3049, 3131	1	0	0	no
ACC	MUC5B	3164, 3273	1	0	0	no
ACC	MUC5B	3428, 3476	1	0	0	no
ACC	MUC5B	3812, 3955	1	0	1	no
ACC	MUC5B	4355, 4388	1	0	1	no
ACC	MUC5B	4460, 4575	1	0	0	no
ACC	MUC6	1676, 1737	1	0	0	no
ACC	MUC6	1835, 1927	2	0	0	no
ACC	MUC6	1972, 2021	1	0	0	no
ACC	MYB	257, 449	0	1	0	no
ACC	NF1	304, 400	1	0	0	no
ACC	NF1	700, 858	0	1	0	no
ACC	NF1	1192, 1276	0	2	0	no
ACC	NF1	1831, 1896	0	1	0	no
ACC	NF1	2380, 2492	0	1	0	no
ACC	NOM1	139, 295	2	0	0	no
ACC	NOTCH1	412, 513	1	0	0	no
ACC	NOTCH1	1305, 1523	1	0	0	no
ACC	NSD1	1594, 1757	0	1	0	no
ACC	OBSCN	2262, 2344	1	0	0	no
ACC	OBSCN	3136, 3292	1	0	0	no
ACC	OBSCN	3954, 4098	1	0	0	no
ACC	OBSCN	4143, 4286	0	1	0	no
ACC	OBSCN	4515, 4516	10	0	4	yes
ACC	OBSCN	5622, 5817	1	0	0	no
ACC	OTOF	1232, 1323	1	0	0	no
ACC	PABPC1	206, 345	4	0	0	no
ACC	PARG	507, 900	0	1	0	no
ACC	PBRM1	709, 798	1	0	0	no
ACC	PCDHA2	22, 82	1	0	0	no
ACC	PCDHA2	548, 582	1	0	0	no
ACC	PCDHA3	338, 419	1	0	0	no
ACC	PCDHGA7	268, 380	1	0	0	no
ACC	PCNXL2	1672, 1799	1	0	0	no
ACC	PCNXL2	1869, 2041	1	0	0	no
ACC	PDGFRA	836, 948	1	0	0	no
ACC	PDILT	11, 76	0	1	0	no
ACC	PER3	643, 884	2	0	0	no
ACC	PIK3CA	1043, 1049	1	0	0	no
ACC	PLCG1	516, 652	1	0	1	no
ACC	PLCG1	664, 809	1	0	0	no
ACC	PLEC	4361, 4461	1	0	1	no
ACC	PLEC	4499, 4624	1	0	5	no
ACC	POLE	390, 436	1	0	0	no
ACC	PTCH1	197, 294	1	0	0	no
ACC	PTCH1	590, 759	0	1	0	no
ACC	PTPRF	1265, 1415	1	0	0	no
ACC	RAB3GAP1	681, 898	0	1	0	no
ACC	RASIP1	601, 794	5	0	0	yes
ACC	RBBP6	1433, 1598	1	0	0	no
ACC	RET	348, 480	1	0	0	no
ACC	RET	547, 640	1	0	0	no
ACC	RINL	256, 408	8	0	0	yes
ACC	RNF31	74, 237	1	0	0	no
ACC	RNF31	378, 658	0	1	0	no
ACC	ROBO3	195, 509	1	0	0	no
ACC	RPTN	368, 468	1	0	0	no
ACC	SALL1	114, 161	1	2	0	no
ACC	SBNO1	1295, 1357	1	0	0	no
ACC	SEMA5B	828, 910	8	0	0	yes
ACC	SETD2	815, 944	0	1	0	no
ACC	SETD2	1690, 1876	1	0	0	no
ACC	SEZ6L2	65, 258	7	0	0	yes
ACC	SEZ6L2	725, 836	1	0	0	no
ACC	SF3B1	34, 185	1	0	0	no
ACC	SGK223	34, 272	2	0	0	no
ACC	SLC1A3	207, 318	1	0	0	no
ACC	SLC26A3	131, 247	1	0	0	no
ACC	SLC28A1	103, 249	1	0	0	no
ACC	SLC4A3	48, 171	1	0	0	no
ACC	SLITRK5	900, 958	0	1	0	no
ACC	SMARCA4	325, 446	1	0	0	no
ACC	SMC3	21, 230	1	0	0	no
ACC	SNED1	1164, 1408	5	0	0	yes
ACC	SPEN	561, 726	1	0	0	no
ACC	SPIRE2	287, 449	2	0	0	no
ACC	STK11	168, 221	1	1	0	no
ACC	TGFBR2	277, 348	2	0	0	no
ACC	THBS1	417, 755	1	0	0	no
ACC	THBS4	6, 101	1	0	0	no
ACC	THBS4	487, 680	1	0	0	no
ACC	TMC4	14, 115	1	0	0	no
ACC	TMEM175	128, 260	1	0	0	no
ACC	TNRC18	577, 734	0	1	1	no
ACC	TNRC18	1477, 1585	1	0	0	no
ACC	TNRC6B	348, 504	0	1	0	no
ACC	TP53	130, 138	1	0	0	no
ACC	TP53	164, 187	1	4	0	yes
ACC	TP53	231, 240	1	0	0	no
ACC	TP53	266, 279	1	0	0	no
ACC	TP53	330, 335	0	1	0	no
ACC	TP53	336, 344	1	0	0	no
ACC	TPO	398, 457	11	0	0	yes
ACC	TPO	834, 906	1	0	0	no
ACC	TPP2	417, 549	1	0	0	no
ACC	TRERF1	1118, 1182	1	0	0	no
ACC	TRIM9	143, 219	1	0	0	no
ACC	TRIOBP	963, 1125	0	1	0	no
ACC	TRIOBP	1192, 1428	9	0	0	yes
ACC	TRIOBP	1460, 1660	1	0	0	no
ACC	TSC22D2	419, 611	6	1	0	yes
ACC	TWISTNB	267, 330	1	0	0	no
ACC	TXNIP	31, 109	0	1	0	no
ACC	U2AF1	24, 38	1	0	0	no
ACC	UGP2	169, 369	1	0	0	no
ACC	UNC5A	649, 815	2	0	0	no
ACC	UNC5D	355, 438	1	0	1	no
ACC	USP42	760, 779	15	0	0	yes
ACC	VAV3	275, 386	1	0	0	no
ACC	VAV3	598, 741	0	1	0	no
ACC	WHSC1L1	764, 910	1	0	0	no
ACC	ZFHX3	2361, 2479	0	2	1	no
ACC	ZFHX3	3177, 3340	0	1	0	no
ACC	ZFPM1	44, 48	0	23	0	yes
ACC	ZFPM1	431, 445	3	12	0	yes
ACC	ZMYM2	997, 1124	1	0	0	no
ACC	ZNF263	490, 609	1	0	0	no
ACC	ZNF334	495, 597	1	0	0	no
ACC	ZNF471	223, 456	1	0	0	no
ACC	ZNF517	309, 368	13	0	0	yes
ACC	ZNF598	93, 273	2	0	0	no
ACC	ZNF628	146, 292	8	0	0	yes
ACC	ZNF644	21, 154	1	0	0	no
ACC	ZNF781	106, 223	1	0	0	no
ACC	ZNF814	320, 324	4	0	0	no
ACC	ZRANB3	886, 1069	1	0	0	no
BLCA	ACVR1B	316, 412	1	0	0	no
BLCA	AHNAK2	655, 775	2	0	1	no
BLCA	AHNAK2	1631, 1736	1	0	0	no
BLCA	AHNAK2	2548, 2638	1	0	0	no
BLCA	AHNAK2	2674, 2754	1	0	0	no
BLCA	AHNAK2	3629, 3712	0	1	0	no
BLCA	AHNAK2	3761, 3837	2	0	0	no
BLCA	AHNAK2	3858, 3915	1	0	0	no
BLCA	AHNAK2	4092, 4188	2	0	0	no
BLCA	AHNAK2	4341, 4446	2	0	0	no
BLCA	AHNAK2	5196, 5379	1	0	0	no
BLCA	ALB	517, 594	1	0	1	no
BLCA	ALPK2	92, 210	1	0	0	no
BLCA	ALPK2	1244, 1329	1	0	0	no
BLCA	ANGPT4	71, 158	1	0	0	no
BLCA	ANGPT4	417, 492	1	1	0	no
BLCA	ANKRD12	537, 812	2	0	0	no
BLCA	APP	488, 595	1	0	0	no
BLCA	ARAP3	357, 681	0	1	0	no
BLCA	ARAP3	924, 1091	1	0	0	no
BLCA	ARAP3	1329, 1464	1	1	0	no
BLCA	ARID1A	457, 515	0	2	0	no
BLCA	ARID1A	521, 576	1	1	0	no
BLCA	ARID1A	664, 711	0	1	0	no
BLCA	ARID1A	992, 1049	1	1	1	no
BLCA	ARID1A	1118, 1172	0	1	0	no
BLCA	ARID1A	1221, 1287	1	0	0	no
BLCA	ARID1A	1324, 1342	0	1	0	no
BLCA	ARID1A	1424, 1528	0	1	0	no
BLCA	ARID1A	1900, 1961	1	0	0	no
BLCA	ARID1A	2011, 2052	2	2	0	no
BLCA	ARID1A	2104, 2198	1	0	0	no
BLCA	ARID5B	372, 511	1	0	0	no
BLCA	ARID5B	981, 1044	1	0	1	no
BLCA	ASXL1	42, 229	0	1	1	no
BLCA	ASXL1	480, 906	1	1	1	no
BLCA	ASXL1	997, 1186	2	0	0	no
BLCA	ASXL1	1246, 1336	2	0	0	no
BLCA	ASXL2	192, 505	3	3	0	yes
BLCA	ASXL2	1010, 1239	1	0	0	no
BLCA	ATAD5	45, 138	1	0	0	no
BLCA	ATAD5	296, 526	2	0	0	no
BLCA	ATAD5	999, 1187	1	0	0	no
BLCA	ATAD5	1423, 1802	1	1	0	no
BLCA	ATM	219, 284	2	0	0	no
BLCA	ATM	1381, 1500	1	0	0	no
BLCA	ATM	2060, 2164	3	0	0	no
BLCA	ATM	2363, 2494	1	0	0	no
BLCA	ATM	2845, 2937	2	0	0	no
BLCA	ATM	2987, 3032	2	1	1	no
BLCA	AVL9	94, 291	2	0	0	no
BLCA	AXIN1	610, 810	2	1	0	no
BLCA	BAP1	1, 60	1	0	0	no
BLCA	BAP1	163, 324	1	0	0	no
BLCA	BMP2K	918, 1100	1	0	1	no
BLCA	BRDT	136, 246	1	0	1	no
BLCA	BRDT	712, 888	1	0	0	no
BLCA	BTBD11	624, 741	0	1	0	no
BLCA	BTBD11	769, 980	1	0	0	no
BLCA	BTNL8	96, 209	1	0	0	no
BLCA	C15orf39	817, 1027	1	0	0	no
BLCA	CACNG3	207, 255	0	1	0	no
BLCA	CASP8	325, 409	0	1	0	no
BLCA	CASZ1	69, 273	1	0	1	no
BLCA	CASZ1	669, 723	0	1	1	no
BLCA	CASZ1	1250, 1419	1	0	0	no
BLCA	CCDC150	54, 189	1	0	0	no
BLCA	CDC27	28, 130	1	0	0	no
BLCA	CDH1	63, 113	1	0	0	no
BLCA	CDH1	224, 261	1	0	0	no
BLCA	CDH1	365, 431	1	0	0	no
BLCA	CDHR5	506, 687	0	1	1	no
BLCA	CDK12	342, 602	1	0	1	no
BLCA	CDKN1A	32, 69	1	7	0	yes
BLCA	CDKN2A	71, 89	1	2	0	no
BLCA	CDKN2A	101, 114	1	0	0	no
BLCA	CDKN2A	118, 129	1	0	0	no
BLCA	CHD4	569, 659	2	0	0	no
BLCA	CHD4	714, 820	1	0	0	no
BLCA	CHD4	1287, 1376	3	0	0	no
BLCA	CHD4	1510, 1675	1	0	1	no
BLCA	CHD8	1170, 1419	1	0	1	no
BLCA	CHD8	1448, 1605	1	0	0	no
BLCA	CHD8	1727, 1930	2	0	0	no
BLCA	CHEK2	247, 433	4	1	1	yes
BLCA	CIC	174, 253	1	0	0	no
BLCA	CLDN23	129, 253	0	1	0	no
BLCA	CLIC6	430, 703	1	0	1	no
BLCA	CPS1	711, 787	1	0	0	no
BLCA	CPS1	1004, 1207	1	0	1	no
BLCA	CR1	1341, 1444	1	0	0	no
BLCA	CRAT	96, 300	3	0	0	no
BLCA	CRAT	405, 599	2	0	0	no
BLCA	CREBBP	631, 726	2	1	0	no
BLCA	CREBBP	813, 960	0	2	1	no
BLCA	CREBBP	1038, 1152	1	2	0	no
BLCA	CREBBP	1417, 1471	4	0	0	no
BLCA	CREBBP	1614, 1767	1	0	0	no
BLCA	CSDE1	715, 784	1	1	0	no
BLCA	CTCF	320, 418	2	0	0	no
BLCA	CTNNB1	25, 45	3	0	0	no
BLCA	DDX5	453, 556	1	0	0	no
BLCA	DIAPH3	200, 350	1	0	0	no
BLCA	DIAPH3	997, 1153	1	0	1	no
BLCA	DLC1	19, 123	1	0	0	no
BLCA	DLC1	617, 866	4	0	0	no
BLCA	DLC1	1262, 1333	1	0	1	no
BLCA	DLG1	662, 840	1	0	0	no
BLCA	DNER	151, 259	2	0	0	no
BLCA	DNMT1	87, 269	2	0	0	no
BLCA	DNMT1	352, 590	2	0	0	no
BLCA	DSPP	419, 522	1	0	0	no
BLCA	ECM1	160, 262	2	0	0	no
BLCA	ECM1	336, 459	2	0	0	no
BLCA	EDC4	130, 286	0	1	0	no
BLCA	EGFR	351, 411	1	0	0	no
BLCA	EGFR	827, 843	1	0	0	no
BLCA	EIF4A2	233, 316	0	1	0	no
BLCA	ELF3	324, 366	2	1	0	no
BLCA	EP300	207, 402	0	3	0	no
BLCA	EP300	479, 648	1	0	0	no
BLCA	EP300	708, 840	2	1	0	no
BLCA	EP300	1095, 1237	3	1	0	no
BLCA	EP300	1389, 1409	2	0	0	no
BLCA	EP300	1581, 1678	0	2	0	no
BLCA	EP300	1959, 2163	1	0	2	no
BLCA	EPAS1	578, 710	1	0	0	no
BLCA	EPHA2	302, 500	2	0	0	no
BLCA	EPHA2	541, 680	1	1	0	no
BLCA	ERBB2	305, 313	3	0	0	no
BLCA	ERBB2	573, 705	1	0	1	no
BLCA	ERBB2	767, 781	1	0	0	no
BLCA	ERBB3	40, 623	13	0	1	yes
BLCA	ERCC2	241, 312	2	0	0	no
BLCA	ERCC2	383, 554	1	0	1	no
BLCA	ERCC3	278, 410	1	0	0	no
BLCA	ERCC3	520, 704	1	0	2	no
BLCA	EZH2	207, 359	1	0	0	no
BLCA	FADS2	182, 291	1	0	0	no
BLCA	FAM63B	179, 413	1	0	0	no
BLCA	FAM65B	253, 412	0	1	0	no
BLCA	FAM65B	506, 559	1	0	0	no
BLCA	FAT1	785, 866	1	0	0	no
BLCA	FAT1	1313, 1427	0	1	0	no
BLCA	FAT1	1537, 1689	0	1	0	no
BLCA	FAT1	1915, 2049	0	2	0	no
BLCA	FAT1	2149, 2225	1	0	0	no
BLCA	FAT1	2413, 2533	0	1	0	no
BLCA	FAT1	2579, 2638	0	1	0	no
BLCA	FAT1	2671, 2775	0	1	0	no
BLCA	FAT1	3207, 3333	1	0	0	no
BLCA	FAT1	3597, 3707	0	1	0	no
BLCA	FAT1	3982, 4147	1	1	0	no
BLCA	FAT1	4347, 4519	0	1	0	no
BLCA	FAT2	331, 459	1	0	0	no
BLCA	FAT2	920, 1076	1	0	0	no
BLCA	FAT2	1109, 1315	1	0	2	no
BLCA	FAT2	1331, 1445	1	0	0	no
BLCA	FAT2	1786, 1884	1	0	0	no
BLCA	FAT2	2085, 2196	1	0	0	no
BLCA	FAT2	2847, 2974	1	0	0	no
BLCA	FBXW7	479, 481	1	0	0	no
BLCA	FBXW7	502, 526	4	0	0	no
BLCA	FBXW7	651, 667	0	1	0	no
BLCA	FCN1	218, 293	1	0	0	no
BLCA	FGFR3	248, 254	11	0	0	yes
BLCA	FGFR3	349, 456	4	0	1	no
BLCA	FLT3	290, 595	0	1	0	no
BLCA	FN1	776, 890	2	0	0	no
BLCA	FOXA1	237, 274	0	2	0	no
BLCA	FOXP2	255, 346	1	0	0	no
BLCA	FOXP2	497, 591	2	0	0	no
BLCA	FRMPD2	78, 195	1	0	0	no
BLCA	FRMPD2	733, 795	1	0	0	no
BLCA	FUBP1	88, 206	1	0	0	no
BLCA	FUBP1	398, 480	1	0	0	no
BLCA	GABBR1	29, 115	1	0	0	no
BLCA	GABBR1	269, 408	1	0	0	no
BLCA	GAS2L2	432, 523	0	1	1	no
BLCA	GIGYF2	158, 233	1	0	1	no
BLCA	GNPTAB	587, 786	0	1	0	no
BLCA	GPR128	292, 419	1	0	1	no
BLCA	GPRIN2	39, 126	2	0	0	no
BLCA	GUSB	330, 430	1	0	0	no
BLCA	HLA-A	23, 114	0	1	0	no
BLCA	HNF1A	94, 210	1	0	0	no
BLCA	HRAS	11, 13	3	0	0	no
BLCA	HRAS	61, 61	1	0	0	no
BLCA	HRNR	309, 342	1	1	0	no
BLCA	HRNR	653, 729	1	0	0	no
BLCA	HRNR	1955, 1995	2	0	0	no
BLCA	HRNR	2019, 2043	1	0	0	no
BLCA	HRNR	2126, 2144	2	0	1	no
BLCA	HRNR	2662, 2831	1	0	0	no
BLCA	IBTK	423, 575	1	0	0	no
BLCA	IDH1	132, 132	1	0	0	no
BLCA	IL6ST	439, 627	1	0	0	no
BLCA	INPP4B	806, 906	1	1	0	no
BLCA	INTS7	67, 199	2	0	0	no
BLCA	INTS7	562, 832	1	0	1	no
BLCA	IPP	292, 402	1	0	0	no
BLCA	IRF2	13, 64	1	0	0	no
BLCA	IRS1	195, 263	1	0	0	no
BLCA	ITGAL	781, 889	1	0	0	no
BLCA	JUB	279, 465	2	0	0	no
BLCA	KDR	921, 992	3	0	2	no
BLCA	KDR	1166, 1319	1	1	0	no
BLCA	KEAP1	231, 284	1	0	0	no
BLCA	KIAA1211	396, 544	1	0	0	no
BLCA	KIAA1211	694, 812	1	0	0	no
BLCA	KIAA1804	270, 371	1	0	0	no
BLCA	KIT	2, 74	2	0	0	no
BLCA	KLF5	175, 255	1	2	0	no
BLCA	KLHL1	98, 183	1	0	1	no
BLCA	KLHL1	221, 292	1	0	0	no
BLCA	KNDC1	346, 492	1	0	0	no
BLCA	KNDC1	1145, 1281	1	0	0	no
BLCA	LACTB	363, 502	1	0	0	no
BLCA	LRIG1	96, 163	2	0	0	no
BLCA	LZTR1	243, 324	1	0	0	no
BLCA	MAP1S	853, 1025	1	0	0	no
BLCA	MAP3K1	1311, 1473	1	0	0	no
BLCA	MAP3K7	186, 349	1	0	0	no
BLCA	MAP7	428, 604	2	0	0	no
BLCA	MCTP1	428, 549	1	0	1	no
BLCA	MED23	314, 479	1	0	0	no
BLCA	MED23	520, 724	0	1	0	no
BLCA	MEPCE	203, 363	2	0	0	no
BLCA	MGA	88, 274	2	0	0	no
BLCA	MGA	808, 1007	2	0	0	no
BLCA	MGA	1203, 1348	0	1	0	no
BLCA	MKI67	234, 310	2	0	0	no
BLCA	MKI67	1218, 1341	1	0	0	no
BLCA	MKI67	1948, 2069	2	0	0	no
BLCA	MKI67	2090, 2214	0	1	0	no
BLCA	MKI67	2258, 2375	0	1	0	no
BLCA	MKL1	439, 602	1	0	0	no
BLCA	MLL	1058, 1264	1	1	0	no
BLCA	MLL	1566, 1707	2	0	0	no
BLCA	MLL	2561, 2725	1	2	0	no
BLCA	MLL	2765, 2946	4	0	0	no
BLCA	MLL	3647, 3823	0	2	1	no
BLCA	MLL2	255, 415	0	1	2	no
BLCA	MLL2	668, 829	2	0	1	no
BLCA	MLL2	1200, 1290	2	0	0	no
BLCA	MLL2	1835, 2014	0	1	0	no
BLCA	MLL2	2311, 2483	2	1	0	no
BLCA	MLL2	3536, 3646	0	2	0	no
BLCA	MLL2	4399, 4583	1	3	0	no
BLCA	MLL2	4727, 4915	0	1	0	no
BLCA	MLL2	4964, 5106	1	0	0	no
BLCA	MLL2	5125, 5214	1	2	0	no
BLCA	MLL2	5381, 5466	0	1	0	no
BLCA	MLL3	56, 144	1	0	0	no
BLCA	MLL3	338, 380	2	0	0	no
BLCA	MLL3	782, 845	2	0	0	no
BLCA	MLL3	885, 1002	2	0	0	no
BLCA	MLL3	1684, 1758	2	0	0	no
BLCA	MLL3	1982, 2082	1	0	0	no
BLCA	MLL3	2409, 2524	1	0	0	no
BLCA	MLL3	3347, 3524	1	0	1	no
BLCA	MLL3	3579, 3724	0	1	0	no
BLCA	MLL3	3788, 3930	0	1	0	no
BLCA	MLL3	4565, 4714	0	2	0	no
BLCA	MLL4	262, 618	1	1	0	no
BLCA	MLL4	1251, 1463	0	1	1	no
BLCA	MLL4	1530, 1689	1	0	1	no
BLCA	MLL4	1803, 1891	0	1	0	no
BLCA	MLL4	2548, 2712	1	0	0	no
BLCA	MLLT10	416, 515	2	0	0	no
BLCA	MSH4	170, 261	1	0	0	no
BLCA	MSH6	591, 887	2	0	0	no
BLCA	MTOR	602, 773	1	0	0	no
BLCA	MTOR	2206, 2230	1	0	0	no
BLCA	MUC17	1319, 1376	3	0	0	no
BLCA	MUC17	1589, 1673	1	0	0	no
BLCA	MUC17	1696, 1808	1	0	0	no
BLCA	MUC17	1993, 2112	1	0	0	no
BLCA	MUC17	2268, 2342	1	0	0	no
BLCA	MUC17	2718, 2790	1	0	0	no
BLCA	MUC17	3043, 3155	1	0	0	no
BLCA	MUC17	3256, 3329	1	0	0	no
BLCA	MUC5B	1827, 1955	1	0	0	no
BLCA	MUC5B	3428, 3476	0	1	0	no
BLCA	MUC5B	4805, 4865	1	0	1	no
BLCA	MUC5B	5081, 5301	1	1	0	no
BLCA	MUC6	1417, 1544	1	0	0	no
BLCA	MYH10	81, 175	1	0	0	no
BLCA	MYH10	765, 888	1	0	1	no
BLCA	MYH10	1293, 1482	2	0	1	no
BLCA	MYH10	1557, 1670	1	0	0	no
BLCA	MYH10	1821, 1976	1	0	0	no
BLCA	MYH9	488, 567	1	0	0	no
BLCA	MYH9	749, 877	2	2	1	no
BLCA	MYH9	954, 1070	1	1	1	no
BLCA	MYH9	1259, 1417	1	0	0	no
BLCA	MYH9	1472, 1792	1	0	2	no
BLCA	NCOR1	461, 627	0	2	0	no
BLCA	NCOR1	967, 1109	1	0	0	no
BLCA	NCOR1	1435, 1582	1	0	0	no
BLCA	NCOR1	1713, 1909	1	0	0	no
BLCA	NCOR1	2211, 2391	1	0	1	no
BLCA	NF1	420, 482	1	0	0	no
BLCA	NF1	520, 666	1	0	0	no
BLCA	NF1	700, 858	1	1	0	no
BLCA	NF1	923, 1083	1	2	0	no
BLCA	NF1	1568, 1668	0	1	0	no
BLCA	NF1	1831, 1896	1	0	0	no
BLCA	NF2	245, 418	1	1	0	no
BLCA	NFAT5	111, 263	0	1	0	no
BLCA	NFAT5	842, 986	1	0	0	no
BLCA	NFE2L2	24, 34	5	0	0	yes
BLCA	NFE2L2	77, 82	4	0	0	no
BLCA	NOM1	139, 295	2	0	0	no
BLCA	NOM1	320, 460	1	0	1	no
BLCA	NOTCH1	1305, 1523	1	0	0	no
BLCA	NOTCH1	1906, 1977	0	1	0	no
BLCA	NOTCH1	1980, 2085	1	0	0	no
BLCA	NOTCH2	386, 507	0	1	0	no
BLCA	NOTCH2	1841, 1983	2	0	1	no
BLCA	NRAS	61, 61	1	0	0	no
BLCA	NSD1	1952, 2017	1	0	1	no
BLCA	OBSCN	2395, 2556	1	0	0	no
BLCA	OBSCN	3136, 3292	1	0	0	no
BLCA	OBSCN	4143, 4286	1	0	0	no
BLCA	OBSCN	4835, 4997	1	0	0	no
BLCA	OBSCN	6600, 6727	1	0	0	no
BLCA	OTOF	71, 220	2	0	1	no
BLCA	OTOF	408, 502	2	0	2	no
BLCA	OTOF	1548, 1761	1	0	0	no
BLCA	PBRM1	115, 194	1	0	1	no
BLCA	PBRM1	528, 666	1	0	0	no
BLCA	PBRM1	709, 798	2	1	0	no
BLCA	PBRM1	976, 1049	1	0	0	no
BLCA	PBRM1	1231, 1316	2	0	0	no
BLCA	PBRM1	1504, 1603	0	1	0	no
BLCA	PCDHA2	144, 238	1	0	2	no
BLCA	PCDHA3	61, 103	1	0	0	no
BLCA	PCDHGA7	268, 380	2	0	0	no
BLCA	PCDHGA9	32, 218	2	0	0	no
BLCA	PCDHGB1	189, 281	2	0	0	no
BLCA	PCDHGB1	296, 394	1	0	0	no
BLCA	PCNXL2	446, 585	1	0	0	no
BLCA	PCNXL2	835, 1037	1	0	1	no
BLCA	PCNXL2	1672, 1799	1	0	0	no
BLCA	PCNXL2	1869, 2041	1	0	0	no
BLCA	PDGFRA	487, 560	2	0	0	no
BLCA	PDGFRA	1013, 1088	1	0	0	no
BLCA	PDILT	11, 76	1	0	0	no
BLCA	PER3	643, 884	1	0	0	no
BLCA	PGM5	456, 522	1	0	0	no
BLCA	PIK3CA	357, 378	1	0	0	no
BLCA	PIK3CA	451, 456	2	0	0	no
BLCA	PIK3CA	539, 547	18	0	0	yes
BLCA	PIK3CA	1043, 1049	2	0	0	no
BLCA	PIK3R1	617, 670	1	0	0	no
BLCA	PLCG1	664, 809	1	0	0	no
BLCA	PLCG1	1120, 1261	2	0	0	no
BLCA	PLEC	2791, 2921	1	0	0	no
BLCA	PLEC	2951, 3039	2	0	0	no
BLCA	PLEC	3838, 4066	2	0	0	no
BLCA	PLEC	4192, 4352	1	0	0	no
BLCA	PLEC	4361, 4461	1	0	0	no
BLCA	POLE	1534, 1752	3	0	0	no
BLCA	PSIP1	50, 151	1	0	0	no
BLCA	PSIP1	274, 354	1	1	0	no
BLCA	PTCH1	466, 571	1	0	0	no
BLCA	PTCH1	590, 759	1	0	0	no
BLCA	PTEN	229, 239	1	0	0	no
BLCA	PTPRF	1721, 1861	2	0	0	no
BLCA	RAB3GAP1	190, 325	3	0	0	no
BLCA	RAB3GAP1	681, 898	3	0	1	no
BLCA	RAD21	506, 596	1	0	0	no
BLCA	RAE1	186, 280	1	0	0	no
BLCA	RASA1	317, 449	1	0	0	no
BLCA	RASGRF2	868, 978	1	0	1	no
BLCA	RASIP1	830, 958	1	0	0	no
BLCA	RB1	53, 97	0	1	0	no
BLCA	RB1	251, 350	0	2	0	no
BLCA	RB1	536, 580	1	1	0	no
BLCA	RB1	695, 761	1	2	0	no
BLCA	RB1	770, 802	0	1	0	no
BLCA	RBBP6	91, 225	1	0	0	no
BLCA	RBBP6	496, 602	2	0	0	no
BLCA	RBBP6	1433, 1598	2	0	0	no
BLCA	RBM26	21, 194	2	0	0	no
BLCA	RET	756, 893	1	0	0	no
BLCA	RHOA	22, 76	2	0	0	no
BLCA	RINL	256, 408	0	1	0	no
BLCA	RNF31	74, 237	1	0	1	no
BLCA	RNF31	378, 658	1	0	1	no
BLCA	ROBO3	957, 1192	1	0	0	no
BLCA	RPTN	368, 468	0	1	0	no
BLCA	RPTN	489, 591	1	2	0	no
BLCA	RREB1	120, 611	1	2	1	no
BLCA	RREB1	1444, 1592	1	0	0	no
BLCA	RUNX1	80, 112	1	0	0	no
BLCA	RUNX1	162, 239	1	0	0	no
BLCA	RXRA	412, 443	7	0	1	yes
BLCA	SALL1	28, 85	1	0	0	no
BLCA	SALL1	540, 599	1	0	0	no
BLCA	SBNO1	326, 450	1	0	0	no
BLCA	SBNO1	1295, 1357	1	0	0	no
BLCA	SEMA3C	392, 495	1	0	0	no
BLCA	SEMA5B	218, 328	2	0	0	no
BLCA	SEMA5B	358, 474	1	0	0	no
BLCA	SETD2	1207, 1368	2	0	0	no
BLCA	SETD2	1478, 1541	0	1	0	no
BLCA	SETD2	1589, 1640	1	0	1	no
BLCA	SETD2	2257, 2511	1	0	0	no
BLCA	SEZ6L2	65, 258	1	0	0	no
BLCA	SF3B1	34, 185	1	0	0	no
BLCA	SF3B1	576, 781	1	0	0	no
BLCA	SF3B1	847, 959	3	0	0	no
BLCA	SGK1	1, 59	0	1	0	no
BLCA	SIN3A	80, 176	1	0	0	no
BLCA	SIN3A	1055, 1224	2	0	0	no
BLCA	SLC1A3	207, 318	1	0	0	no
BLCA	SLC26A3	273, 391	1	0	0	no
BLCA	SLC26A8	656, 740	0	1	0	no
BLCA	SLC39A5	267, 377	1	0	0	no
BLCA	SLC4A3	48, 171	1	0	0	no
BLCA	SLC4A3	856, 924	1	0	0	no
BLCA	SLITRK5	272, 338	1	0	0	no
BLCA	SMAD2	407, 464	1	0	0	no
BLCA	SMAD4	65, 144	1	0	0	no
BLCA	SMARCA4	740, 828	2	0	3	no
BLCA	SMARCA4	966, 1068	1	0	0	no
BLCA	SMARCA4	1083, 1162	2	0	0	no
BLCA	SMARCA4	1339, 1471	2	0	0	no
BLCA	SMC3	876, 984	1	0	0	no
BLCA	SMG7	890, 1040	3	0	0	no
BLCA	SNED1	516, 1132	1	0	0	no
BLCA	SNED1	1164, 1408	1	0	0	no
BLCA	SOS1	404, 478	2	0	0	no
BLCA	SPEN	117, 314	2	0	0	no
BLCA	SPEN	376, 491	0	1	0	no
BLCA	SPEN	756, 877	0	1	0	no
BLCA	SPEN	1934, 2081	1	0	0	no
BLCA	SPEN	2113, 2260	1	0	1	no
BLCA	SPEN	2846, 3003	1	0	0	no
BLCA	SPEN	3249, 3403	1	0	1	no
BLCA	ST6GALNAC5	145, 220	1	0	0	no
BLCA	SUZ12	265, 383	2	0	0	no
BLCA	SV2A	129, 200	1	0	0	no
BLCA	SYNGAP1	45, 173	1	0	1	no
BLCA	SYT15	63, 136	1	0	0	no
BLCA	TAP1	383, 657	0	1	0	no
BLCA	TBL1XR1	302, 394	2	0	0	no
BLCA	TBX3	70, 129	1	0	0	no
BLCA	TBX3	151, 224	1	0	0	no
BLCA	TBX3	280, 418	1	0	0	no
BLCA	TCF12	299, 523	1	0	0	no
BLCA	TCF12	559, 676	1	0	1	no
BLCA	TDG	167, 339	1	0	0	no
BLCA	TET2	509, 612	0	1	0	no
BLCA	TET2	716, 849	1	0	0	no
BLCA	TGFBR2	277, 348	1	0	0	no
BLCA	TGS1	607, 764	2	0	0	no
BLCA	TIGD4	96, 201	1	0	0	no
BLCA	TMEM175	128, 260	1	0	0	no
BLCA	TNRC18	2155, 2355	1	0	0	no
BLCA	TNRC18	2677, 2830	2	0	0	no
BLCA	TNRC6B	348, 504	0	1	0	no
BLCA	TNRC6B	668, 790	0	1	0	no
BLCA	TP53	33, 39	1	0	0	no
BLCA	TP53	121, 127	0	1	0	no
BLCA	TP53	130, 138	2	0	0	no
BLCA	TP53	139, 144	1	1	0	no
BLCA	TP53	146, 159	9	0	0	yes
BLCA	TP53	164, 187	4	1	0	yes
BLCA	TP53	192, 201	1	3	0	no
BLCA	TP53	203, 216	12	0	0	yes
BLCA	TP53	218, 222	1	0	0	no
BLCA	TP53	231, 240	2	2	0	no
BLCA	TP53	241, 255	4	0	0	no
BLCA	TP53	256, 260	1	0	0	no
BLCA	TP53	266, 279	6	1	0	yes
BLCA	TP53	280, 289	10	2	0	yes
BLCA	TP53	330, 335	0	1	0	no
BLCA	TP53	336, 344	0	1	0	no
BLCA	TP53BP1	819, 1049	1	0	1	no
BLCA	TP53BP1	1430, 1578	1	0	0	no
BLCA	TPO	148, 206	1	0	0	no
BLCA	TPO	398, 457	1	0	0	no
BLCA	TPO	834, 906	2	0	0	no
BLCA	TPP2	197, 329	1	0	1	no
BLCA	TPP2	417, 549	1	0	0	no
BLCA	TRERF1	611, 707	1	0	0	no
BLCA	TRERF1	780, 939	3	0	0	no
BLCA	TRERF1	1118, 1182	1	1	0	no
BLCA	TRIM9	143, 219	2	0	0	no
BLCA	TRIOBP	173, 373	1	0	0	no
BLCA	TRIOBP	511, 679	1	0	0	no
BLCA	TSC1	129, 222	1	0	0	no
BLCA	TSC1	328, 477	0	1	0	no
BLCA	TSC1	567, 882	1	2	0	no
BLCA	TWISTNB	267, 330	1	0	0	no
BLCA	TXNIP	31, 109	1	1	2	no
BLCA	TXNIP	139, 194	3	1	0	no
BLCA	U2AF1	24, 38	1	0	0	no
BLCA	UGP2	16, 101	1	0	0	no
BLCA	UGP2	169, 369	2	1	0	no
BLCA	UNC5A	364, 529	2	0	1	no
BLCA	UNC5A	649, 815	1	0	0	no
BLCA	UNC5D	355, 438	1	0	0	no
BLCA	UNC5D	653, 704	1	0	0	no
BLCA	USP28	805, 979	1	0	0	no
BLCA	USP42	82, 299	1	0	0	no
BLCA	VAV3	38, 123	1	0	0	no
BLCA	VAV3	598, 741	1	0	0	no
BLCA	VEPH1	358, 507	1	0	0	no
BLCA	WHSC1L1	574, 714	1	0	0	no
BLCA	ZBTB20	345, 504	1	0	0	no
BLCA	ZBTB7B	222, 319	1	0	0	no
BLCA	ZBTB7C	110, 193	1	0	0	no
BLCA	ZFHX3	2585, 2737	0	1	0	no
BLCA	ZFP36L1	42, 129	0	1	0	no
BLCA	ZFP36L1	154, 245	2	2	0	no
BLCA	ZHX2	38, 127	1	0	0	no
BLCA	ZMYM2	20, 160	2	0	0	no
BLCA	ZMYM2	550, 700	1	0	0	no
BLCA	ZMYM2	758, 951	1	0	0	no
BLCA	ZMYM5	140, 341	2	0	1	no
BLCA	ZNF263	325, 420	1	1	1	no
BLCA	ZNF263	490, 609	1	0	0	no
BLCA	ZNF337	243, 456	0	1	0	no
BLCA	ZNF471	223, 456	1	0	0	no
BLCA	ZNF471	479, 600	1	0	0	no
BLCA	ZNF485	143, 318	1	0	1	no
BLCA	ZNF644	212, 324	1	0	0	no
BLCA	ZNF644	367, 524	1	0	0	no
BLCA	ZNF687	927, 1114	6	0	0	yes
BLCA	ZNF721	271, 438	2	0	0	no
BLCA	ZNF750	14, 96	1	0	0	no
BLCA	ZNF750	250, 351	1	0	0	no
BLCA	ZRANB3	886, 1069	1	0	0	no
BRCA	AATK	888, 1074	1	0	0	no
BRCA	ACTL6B	156, 323	1	7	0	yes
BRCA	ACVR1B	216, 305	2	1	0	no
BRCA	ACVR1B	316, 412	1	1	0	no
BRCA	ADNP	938, 1058	2	0	1	no
BRCA	AHCYL1	202, 415	2	0	0	no
BRCA	AHNAK2	361, 490	2	1	0	no
BRCA	AHNAK2	655, 775	0	1	0	no
BRCA	AHNAK2	902, 975	2	0	1	no
BRCA	AHNAK2	1631, 1736	1	0	1	no
BRCA	AHNAK2	2407, 2535	1	0	0	no
BRCA	AHNAK2	2674, 2754	1	0	0	no
BRCA	AHNAK2	2851, 2951	1	0	1	no
BRCA	AHNAK2	3629, 3712	3	0	2	no
BRCA	AHNAK2	3858, 3915	2	1	1	no
BRCA	AHNAK2	3933, 3994	0	2	0	no
BRCA	AHNAK2	4092, 4188	0	2	1	no
BRCA	AHNAK2	4210, 4309	0	2	0	no
BRCA	AHNAK2	4341, 4446	1	0	0	no
BRCA	AKT2	289, 429	2	2	0	no
BRCA	ALPK2	92, 210	1	0	0	no
BRCA	ALPK2	1244, 1329	2	0	1	no
BRCA	ALPK2	1833, 1971	1	0	0	no
BRCA	ALPK2	1988, 2145	1	0	0	no
BRCA	ANGPT4	71, 158	3	0	0	no
BRCA	ANGPT4	417, 492	1	0	0	no
BRCA	ANKRD12	95, 241	2	0	0	no
BRCA	ANKRD12	313, 476	2	2	0	no
BRCA	ANKRD12	537, 812	1	1	0	no
BRCA	ANKRD12	843, 961	1	3	0	no
BRCA	ANKRD12	1154, 1342	1	1	0	no
BRCA	APC	211, 216	1	0	0	no
BRCA	APC	283, 332	1	1	0	no
BRCA	APC	542, 587	1	0	0	no
BRCA	APC	1277, 1298	0	1	0	no
BRCA	APC	1366, 1387	2	0	0	no
BRCA	APC	1393, 1419	1	0	0	no
BRCA	APC	2166, 2253	0	1	0	no
BRCA	APP	246, 359	1	0	0	no
BRCA	APP	488, 595	2	0	0	no
BRCA	AQP12A	7, 70	5	0	0	yes
BRCA	ARAP3	86, 197	2	0	0	no
BRCA	ARAP3	357, 681	3	1	1	no
BRCA	ARAP3	924, 1091	3	0	0	no
BRCA	ARHGAP18	116, 266	2	0	1	no
BRCA	ARHGAP35	965, 1039	1	1	0	no
BRCA	ARID1A	457, 515	0	1	0	no
BRCA	ARID1A	521, 576	1	4	0	yes
BRCA	ARID1A	664, 711	0	1	1	no
BRCA	ARID1A	1118, 1172	0	2	0	no
BRCA	ARID1A	1221, 1287	1	1	0	no
BRCA	ARID1A	1324, 1342	0	1	0	no
BRCA	ARID1A	1424, 1528	1	1	0	no
BRCA	ARID1A	1900, 1961	1	1	0	no
BRCA	ARID1A	1989, 1994	1	0	0	no
BRCA	ARID1A	2011, 2052	0	1	0	no
BRCA	ARID1A	2104, 2198	2	0	0	no
BRCA	ARID1A	2232, 2275	0	1	0	no
BRCA	ARID5B	143, 295	1	0	0	no
BRCA	ASB5	245, 303	0	1	0	no
BRCA	ASXL1	42, 229	1	0	0	no
BRCA	ASXL1	480, 906	2	1	3	no
BRCA	ASXL1	997, 1186	3	0	0	no
BRCA	ASXL2	192, 505	5	5	1	yes
BRCA	ASXL2	582, 742	5	1	0	yes
BRCA	ATAD5	296, 526	1	0	0	no
BRCA	ATAD5	999, 1187	0	1	0	no
BRCA	ATAD5	1423, 1802	3	0	1	no
BRCA	ATM	597, 749	2	1	0	no
BRCA	ATM	1617, 1730	1	0	0	no
BRCA	ATM	2060, 2164	1	0	0	no
BRCA	ATM	2363, 2494	1	0	1	no
BRCA	ATM	2691, 2726	1	0	0	no
BRCA	ATM	2845, 2937	1	0	0	no
BRCA	ATM	2987, 3032	0	2	0	no
BRCA	ATXN1	619, 713	1	0	0	no
BRCA	AVL9	94, 291	2	0	0	no
BRCA	AXIN1	610, 810	1	0	1	no
BRCA	BAP1	1, 60	2	0	0	no
BRCA	BAP1	163, 324	1	1	0	no
BRCA	BMP2K	288, 431	2	0	0	no
BRCA	BMP2K	918, 1100	0	1	0	no
BRCA	BRDT	320, 409	2	0	0	no
BRCA	BTBD11	624, 741	3	0	0	no
BRCA	C15orf39	817, 1027	2	2	0	no
BRCA	C9orf66	219, 283	1	2	0	no
BRCA	CAB39L	60, 214	0	1	1	no
BRCA	CABYR	51, 227	2	0	0	no
BRCA	CACNG3	117, 149	1	0	0	no
BRCA	CACNG3	207, 255	1	0	1	no
BRCA	CASP8	52, 78	0	1	0	no
BRCA	CASP8	94, 128	0	1	0	no
BRCA	CASP8	325, 409	0	1	0	no
BRCA	CASZ1	69, 273	0	1	1	no
BRCA	CASZ1	503, 612	0	1	0	no
BRCA	CASZ1	669, 723	1	0	0	no
BRCA	CASZ1	1250, 1419	4	0	0	no
BRCA	CASZ1	1449, 1607	1	0	0	no
BRCA	CBFB	48, 112	8	8	1	yes
BRCA	CCDC150	54, 189	2	0	1	no
BRCA	CCDC150	200, 351	3	0	0	no
BRCA	CCDC82	6, 75	1	3	0	no
BRCA	CCND1	240, 293	1	0	0	no
BRCA	CDC27	28, 130	1	0	0	no
BRCA	CDC27	177, 301	1	0	0	no
BRCA	CDC42EP1	68, 260	2	3	2	yes
BRCA	CDH1	63, 113	0	8	0	yes
BRCA	CDH1	144, 222	3	14	0	yes
BRCA	CDH1	224, 261	5	2	0	yes
BRCA	CDH1	365, 431	2	4	1	yes
BRCA	CDH1	644, 733	2	9	0	yes
BRCA	CDHR5	75, 209	1	0	0	no
BRCA	CDK12	342, 602	0	1	1	no
BRCA	CDK12	840, 939	3	0	0	no
BRCA	CDKN2A	71, 89	0	1	0	no
BRCA	CHD4	181, 347	3	0	0	no
BRCA	CHD4	569, 659	0	2	0	no
BRCA	CHD4	714, 820	1	0	0	no
BRCA	CHD4	945, 1016	2	0	0	no
BRCA	CHD4	1287, 1376	1	1	0	no
BRCA	CHD4	1510, 1675	1	1	2	no
BRCA	CHD8	284, 531	2	0	0	no
BRCA	CHD8	599, 796	1	0	0	no
BRCA	CHD8	1170, 1419	2	2	0	no
BRCA	CHD8	1448, 1605	4	0	0	no
BRCA	CHD8	1727, 1930	2	0	2	no
BRCA	CHD8	2244, 2386	0	1	1	no
BRCA	CHEK2	77, 210	3	0	0	no
BRCA	CHEK2	247, 433	2	0	0	no
BRCA	CIC	1221, 1432	1	0	0	no
BRCA	CIC	1459, 1532	1	0	0	no
BRCA	CLIC6	430, 703	2	0	1	no
BRCA	CNTNAP1	113, 239	1	0	1	no
BRCA	CPS1	365, 443	1	0	0	no
BRCA	CPS1	711, 787	1	0	0	no
BRCA	CPS1	1004, 1207	2	0	0	no
BRCA	CPS1	1213, 1321	2	0	0	no
BRCA	CR1	162, 335	3	0	0	no
BRCA	CR1	758, 917	1	0	0	no
BRCA	CR1	1169, 1292	1	0	0	no
BRCA	CR1	1341, 1444	1	0	0	no
BRCA	CR1	1719, 1839	2	0	0	no
BRCA	CR1	1885, 2018	3	1	0	no
BRCA	CRAT	96, 300	3	0	1	no
BRCA	CRAT	405, 599	4	0	0	no
BRCA	CREBBP	174, 277	1	0	0	no
BRCA	CREBBP	631, 726	1	0	0	no
BRCA	CREBBP	1038, 1152	1	0	0	no
BRCA	CREBBP	1614, 1767	2	0	0	no
BRCA	CREBBP	2051, 2160	1	1	0	no
BRCA	CRIPAK	133, 167	0	1	0	no
BRCA	CRIPAK	257, 312	1	0	0	no
BRCA	CSDE1	78, 212	2	0	0	no
BRCA	CSDE1	715, 784	1	0	0	no
BRCA	CTCF	256, 314	6	0	0	yes
BRCA	CTCF	320, 418	1	0	0	no
BRCA	CTCF	482, 651	0	1	1	no
BRCA	CTNND1	403, 472	3	0	0	no
BRCA	CYP11B1	260, 422	2	0	1	no
BRCA	CYP4F3	393, 499	2	0	0	no
BRCA	DDX5	453, 556	1	1	0	no
BRCA	DHX57	261, 474	1	0	0	no
BRCA	DHX57	564, 806	2	0	0	no
BRCA	DHX57	902, 1235	4	1	0	yes
BRCA	DIAPH3	629, 735	1	0	0	no
BRCA	DIAPH3	997, 1153	2	0	0	no
BRCA	DLC1	19, 123	1	0	0	no
BRCA	DLC1	152, 249	1	0	1	no
BRCA	DLC1	272, 367	1	0	0	no
BRCA	DLC1	617, 866	1	1	0	no
BRCA	DLC1	1262, 1333	1	0	0	no
BRCA	DLG1	6, 173	2	2	0	no
BRCA	DLG1	662, 840	1	0	0	no
BRCA	DMKN	141, 282	1	0	0	no
BRCA	DNAH12	22, 504	1	0	0	no
BRCA	DNAH12	905, 1210	3	0	2	no
BRCA	DNAH12	2244, 2719	3	0	0	no
BRCA	DNMT1	87, 269	0	1	0	no
BRCA	DNMT1	352, 590	1	0	0	no
BRCA	DNMT1	696, 1037	3	1	1	no
BRCA	DNMT1	1231, 1507	2	0	0	no
BRCA	DNMT3A	359, 440	1	2	1	no
BRCA	DSPP	304, 397	1	2	0	no
BRCA	DSPP	419, 522	1	0	0	no
BRCA	DSPP	1060, 1079	1	0	0	no
BRCA	DSPP	1088, 1127	1	0	5	no
BRCA	ECM1	336, 459	2	0	0	no
BRCA	EDC4	130, 286	2	0	0	no
BRCA	EGFR	45, 160	2	0	0	no
BRCA	EIF4A2	233, 316	1	0	0	no
BRCA	EMR1	302, 400	1	0	0	no
BRCA	EMR1	628, 721	2	0	0	no
BRCA	EP300	207, 402	1	1	0	no
BRCA	EP300	479, 648	1	1	0	no
BRCA	EP300	708, 840	1	1	0	no
BRCA	EP300	1959, 2163	1	0	0	no
BRCA	EPAS1	13, 92	1	0	1	no
BRCA	EPAS1	578, 710	0	1	0	no
BRCA	EPHA2	302, 500	2	0	0	no
BRCA	EPS8L3	428, 561	1	0	0	no
BRCA	ERBB2	305, 313	3	0	0	no
BRCA	ERBB2	573, 705	2	0	0	no
BRCA	ERBB2	767, 781	6	0	0	yes
BRCA	ERBB3	40, 623	11	0	0	yes
BRCA	ERCC2	383, 554	1	0	0	no
BRCA	ERCC3	32, 142	2	0	1	no
BRCA	ERCC3	278, 410	1	0	0	no
BRCA	EZH2	662, 740	1	0	0	no
BRCA	FADS2	182, 291	1	0	2	no
BRCA	FAM63B	179, 413	0	1	0	no
BRCA	FAM65B	59, 233	1	0	0	no
BRCA	FAM65B	253, 412	1	0	0	no
BRCA	FAM65B	506, 559	1	0	0	no
BRCA	FAT1	460, 567	1	0	0	no
BRCA	FAT1	785, 866	1	0	0	no
BRCA	FAT1	1096, 1192	1	0	0	no
BRCA	FAT1	1915, 2049	1	0	0	no
BRCA	FAT1	2149, 2225	1	0	0	no
BRCA	FAT1	2413, 2533	1	0	0	no
BRCA	FAT1	2671, 2775	2	0	0	no
BRCA	FAT1	2825, 2943	0	1	0	no
BRCA	FAT1	3207, 3333	1	0	0	no
BRCA	FAT1	3818, 3954	1	2	0	no
BRCA	FAT1	3982, 4147	2	0	0	no
BRCA	FAT2	4, 152	1	0	1	no
BRCA	FAT2	557, 600	2	1	0	no
BRCA	FAT2	1109, 1315	2	0	1	no
BRCA	FAT2	1786, 1884	1	0	0	no
BRCA	FAT2	2085, 2196	0	1	1	no
BRCA	FAT2	2603, 2745	1	0	0	no
BRCA	FAT2	2847, 2974	2	0	0	no
BRCA	FAT2	3448, 3565	4	0	0	no
BRCA	FBXW7	465, 465	2	0	0	no
BRCA	FBXW7	479, 481	1	0	0	no
BRCA	FBXW7	502, 526	1	0	0	no
BRCA	FBXW7	651, 667	0	1	0	no
BRCA	FGFR2	203, 570	9	0	0	yes
BRCA	FGFR3	349, 456	0	2	0	no
BRCA	FLT3	290, 595	2	0	0	no
BRCA	FN1	18, 206	1	0	1	no
BRCA	FN1	232, 384	1	0	0	no
BRCA	FN1	776, 890	1	0	1	no
BRCA	FN1	1097, 1185	2	1	0	no
BRCA	FOXA1	144, 176	6	0	0	yes
BRCA	FOXA1	237, 274	9	2	0	yes
BRCA	FRMPD2	78, 195	1	0	0	no
BRCA	FRMPD2	465, 558	1	0	0	no
BRCA	FUBP1	1, 81	1	0	0	no
BRCA	GABBR1	269, 408	1	1	2	no
BRCA	GAS2L2	540, 655	1	0	1	no
BRCA	GATA3	325, 334	1	15	0	yes
BRCA	GATA3	390, 421	1	22	0	yes
BRCA	GATA3	429, 443	0	15	0	yes
BRCA	GFAP	180, 361	3	0	0	no
BRCA	GIGYF2	158, 233	0	1	0	no
BRCA	GIGYF2	698, 872	1	0	0	no
BRCA	GNPTAB	587, 786	0	1	0	no
BRCA	GNPTAB	968, 1139	3	0	0	no
BRCA	GPR128	629, 760	1	0	0	no
BRCA	GPRIN2	39, 126	6	0	1	yes
BRCA	GPRIN2	352, 453	1	0	0	no
BRCA	GRB7	160, 290	1	0	0	no
BRCA	GUSB	330, 430	2	0	0	no
BRCA	HHIPL1	94, 242	1	1	2	no
BRCA	HIBCH	85, 232	1	0	0	no
BRCA	HLA-B	98, 159	1	0	0	no
BRCA	HLA-C	113, 167	2	1	0	no
BRCA	HNF1A	94, 210	2	0	0	no
BRCA	HNRNPM	203, 324	2	0	0	no
BRCA	HRAS	11, 13	1	0	0	no
BRCA	HRAS	61, 61	1	0	0	no
BRCA	HRNR	423, 506	1	0	0	no
BRCA	HRNR	806, 899	1	0	1	no
BRCA	HRNR	1685, 1794	7	0	0	yes
BRCA	HRNR	2662, 2831	1	5	0	yes
BRCA	IBTK	5, 118	1	0	0	no
BRCA	IBTK	423, 575	1	0	1	no
BRCA	IBTK	610, 752	1	0	0	no
BRCA	IDH1	132, 132	1	0	0	no
BRCA	IL6ST	66, 256	2	0	0	no
BRCA	IL6ST	439, 627	2	0	0	no
BRCA	INPP4B	806, 906	1	0	0	no
BRCA	INTS7	241, 398	1	0	0	no
BRCA	INTS7	562, 832	3	0	1	no
BRCA	IRS1	195, 263	1	0	0	no
BRCA	IRS1	651, 776	1	1	0	no
BRCA	IRX4	176, 230	1	0	0	no
BRCA	ITGAL	208, 309	1	0	0	no
BRCA	ITGAL	781, 889	1	0	0	no
BRCA	JAKMIP2	34, 163	1	0	0	no
BRCA	KDR	328, 400	1	0	0	no
BRCA	KDR	749, 804	1	0	0	no
BRCA	KDR	921, 992	2	0	0	no
BRCA	KDR	1166, 1319	1	1	0	no
BRCA	KEAP1	137, 189	1	0	0	no
BRCA	KEAP1	449, 493	0	3	0	no
BRCA	KIAA1211	109, 229	1	0	0	no
BRCA	KIAA1211	396, 544	1	0	0	no
BRCA	KIAA1211	694, 812	1	0	2	no
BRCA	KIAA1211	1101, 1195	1	0	0	no
BRCA	KIAA1804	430, 534	1	0	0	no
BRCA	KIAA1984	144, 373	2	1	0	no
BRCA	KIF20B	442, 544	0	1	0	no
BRCA	KIF20B	955, 1043	0	1	0	no
BRCA	KIF20B	1700, 1818	1	0	0	no
BRCA	KIT	2, 74	2	0	0	no
BRCA	KLHL1	221, 292	1	0	1	no
BRCA	KLHL1	330, 403	2	0	0	no
BRCA	KLHL1	541, 611	1	0	0	no
BRCA	KLHL5	260, 404	0	1	0	no
BRCA	KLHL8	262, 402	3	0	0	no
BRCA	KNDC1	1145, 1281	1	0	1	no
BRCA	KNDC1	1477, 1684	1	0	0	no
BRCA	L1TD1	52, 138	1	0	0	no
BRCA	LARP4B	145, 178	2	0	0	no
BRCA	LRIG1	535, 627	0	1	0	no
BRCA	LZTR1	243, 324	1	0	0	no
BRCA	LZTR1	394, 478	1	0	0	no
BRCA	LZTR1	571, 723	2	0	0	no
BRCA	MAP1S	853, 1025	1	0	0	no
BRCA	MAP2K4	224, 306	6	3	0	yes
BRCA	MAP3K1	305, 370	2	8	1	yes
BRCA	MAP3K1	431, 547	0	9	0	yes
BRCA	MAP3K1	670, 795	2	11	0	yes
BRCA	MAP3K1	1036, 1147	1	11	1	yes
BRCA	MAP3K1	1182, 1283	1	8	0	yes
BRCA	MAP3K1	1311, 1473	5	6	1	yes
BRCA	MAP3K7	186, 349	2	1	1	no
BRCA	MED15	287, 519	1	1	0	no
BRCA	MED23	45, 170	0	1	1	no
BRCA	MED23	520, 724	5	2	0	yes
BRCA	MED23	1075, 1242	0	2	0	no
BRCA	MEN1	83, 160	1	1	2	no
BRCA	MEPCE	203, 363	1	0	1	no
BRCA	MET	187, 238	1	0	0	no
BRCA	MET	469, 626	1	0	2	no
BRCA	MET	1009, 1148	1	0	0	no
BRCA	MGA	88, 274	3	1	0	no
BRCA	MGA	424, 645	2	0	1	no
BRCA	MGA	808, 1007	1	1	0	no
BRCA	MGA	1203, 1348	0	1	0	no
BRCA	MGA	1492, 1761	3	0	0	no
BRCA	MKI67	1598, 1698	3	0	0	no
BRCA	MKI67	2090, 2214	1	0	1	no
BRCA	MKI67	2258, 2375	1	0	0	no
BRCA	MKI67	3030, 3129	1	0	1	no
BRCA	MKL1	19, 116	1	1	0	no
BRCA	MKL1	228, 330	1	0	0	no
BRCA	MLL	1058, 1264	1	1	0	no
BRCA	MLL	1566, 1707	1	0	0	no
BRCA	MLL	2213, 2439	1	1	0	no
BRCA	MLL	2765, 2946	1	0	0	no
BRCA	MLL	3045, 3202	2	0	2	no
BRCA	MLL	3647, 3823	1	1	0	no
BRCA	MLL2	255, 415	1	0	0	no
BRCA	MLL2	1835, 2014	2	0	0	no
BRCA	MLL2	3536, 3646	4	0	0	no
BRCA	MLL2	4399, 4583	1	0	1	no
BRCA	MLL2	4727, 4915	1	0	0	no
BRCA	MLL2	5125, 5214	1	0	0	no
BRCA	MLL2	5381, 5466	1	0	0	no
BRCA	MLL3	56, 144	2	2	0	no
BRCA	MLL3	338, 380	3	0	0	no
BRCA	MLL3	885, 1002	2	2	0	no
BRCA	MLL3	1162, 1269	1	2	0	no
BRCA	MLL3	1684, 1758	0	4	0	no
BRCA	MLL3	1881, 1977	0	1	1	no
BRCA	MLL3	1982, 2082	1	1	0	no
BRCA	MLL3	2409, 2524	0	1	0	no
BRCA	MLL3	3022, 3177	2	2	0	no
BRCA	MLL3	3347, 3524	2	0	0	no
BRCA	MLL3	3579, 3724	2	1	0	no
BRCA	MLL3	3788, 3930	0	2	0	no
BRCA	MLL3	4307, 4391	1	3	0	no
BRCA	MLL3	4565, 4714	0	2	0	no
BRCA	MLL4	125, 192	2	1	0	no
BRCA	MLL4	262, 618	0	3	0	no
BRCA	MLL4	1251, 1463	0	1	1	no
BRCA	MLL4	1530, 1689	1	1	1	no
BRCA	MLL4	2548, 2712	1	1	0	no
BRCA	MLLT10	416, 515	2	0	0	no
BRCA	MLLT10	777, 912	1	0	0	no
BRCA	MSH4	170, 261	1	0	0	no
BRCA	MSH4	683, 777	1	0	1	no
BRCA	MSH6	422, 530	0	1	2	no
BRCA	MSH6	591, 887	3	1	0	no
BRCA	MSH6	912, 993	1	1	0	no
BRCA	MSH6	1196, 1334	1	0	0	no
BRCA	MTOR	602, 773	1	0	0	no
BRCA	MTOR	989, 1160	1	0	0	no
BRCA	MTOR	1966, 2033	1	0	1	no
BRCA	MTOR	2407, 2532	2	0	0	no
BRCA	MUC17	637, 704	1	0	1	no
BRCA	MUC17	1319, 1376	2	1	2	no
BRCA	MUC17	1589, 1673	1	0	1	no
BRCA	MUC17	1696, 1808	0	1	0	no
BRCA	MUC17	2136, 2226	2	1	0	no
BRCA	MUC17	2268, 2342	2	0	0	no
BRCA	MUC17	2558, 2669	1	0	0	no
BRCA	MUC17	3043, 3155	1	0	0	no
BRCA	MUC17	3490, 3599	1	0	0	no
BRCA	MUC17	3644, 3815	2	0	0	no
BRCA	MUC17	4340, 4420	1	0	0	no
BRCA	MUC5B	796, 1040	1	1	0	no
BRCA	MUC5B	1464, 1632	2	0	0	no
BRCA	MUC5B	2174, 2315	2	0	0	no
BRCA	MUC5B	2568, 2688	3	0	0	no
BRCA	MUC5B	2748, 2905	6	0	2	yes
BRCA	MUC5B	3049, 3131	0	1	1	no
BRCA	MUC5B	3812, 3955	1	2	1	no
BRCA	MUC5B	4042, 4164	1	0	0	no
BRCA	MUC5B	4924, 5049	0	1	0	no
BRCA	MUC6	1272, 1386	0	2	0	no
BRCA	MUC6	1676, 1737	1	0	0	no
BRCA	MUC6	2196, 2290	0	4	0	no
BRCA	MYB	257, 449	3	2	0	yes
BRCA	MYH10	765, 888	2	0	0	no
BRCA	MYH10	945, 1095	0	1	0	no
BRCA	MYH10	1293, 1482	5	0	1	yes
BRCA	MYH10	1557, 1670	1	0	0	no
BRCA	MYH9	92, 234	1	0	1	no
BRCA	MYH9	488, 567	4	0	0	no
BRCA	MYH9	749, 877	4	1	1	yes
BRCA	MYH9	954, 1070	0	1	0	no
BRCA	MYH9	1472, 1792	0	1	1	no
BRCA	NCOR1	93, 220	3	2	1	yes
BRCA	NCOR1	461, 627	1	4	0	yes
BRCA	NCOR1	967, 1109	2	3	0	yes
BRCA	NCOR1	1435, 1582	0	1	0	no
BRCA	NCOR1	1713, 1909	7	2	0	yes
BRCA	NCOR1	2211, 2391	3	1	0	no
BRCA	NF1	53, 216	0	2	0	no
BRCA	NF1	304, 400	0	4	0	no
BRCA	NF1	520, 666	1	2	0	no
BRCA	NF1	700, 858	1	0	1	no
BRCA	NF1	1192, 1276	1	1	0	no
BRCA	NF1	1391, 1530	1	2	0	no
BRCA	NF1	1568, 1668	0	1	0	no
BRCA	NF1	1831, 1896	2	0	1	no
BRCA	NF2	245, 418	0	1	0	no
BRCA	NFAT5	111, 263	2	0	1	no
BRCA	NFAT5	842, 986	1	1	0	no
BRCA	NFE2L2	77, 82	0	1	0	no
BRCA	NKX3-1	171, 226	2	0	0	no
BRCA	NOM1	649, 828	1	0	0	no
BRCA	NOTCH1	767, 893	1	0	0	no
BRCA	NOTCH1	1063, 1165	1	0	0	no
BRCA	NOTCH1	1305, 1523	1	0	0	no
BRCA	NOTCH1	1980, 2085	1	0	1	no
BRCA	NOTCH1	2327, 2487	2	1	0	no
BRCA	NOTCH2	114, 238	1	0	0	no
BRCA	NOTCH2	386, 507	1	0	0	no
BRCA	NOTCH2	1087, 1218	1	0	0	no
BRCA	NOTCH2	1630, 1800	3	0	0	no
BRCA	NOTCH2	2219, 2359	2	2	0	no
BRCA	NPTX1	162, 263	1	0	0	no
BRCA	NSD1	589, 728	1	0	0	no
BRCA	NSD1	744, 874	1	0	0	no
BRCA	NSD1	1122, 1218	1	0	0	no
BRCA	NSD1	1952, 2017	1	0	0	no
BRCA	NUP93	14, 88	4	0	0	no
BRCA	OBSCN	495, 682	1	0	1	no
BRCA	OBSCN	998, 1140	2	0	2	no
BRCA	OBSCN	2395, 2556	1	0	0	no
BRCA	OBSCN	2892, 3012	0	1	0	no
BRCA	OBSCN	3136, 3292	1	0	0	no
BRCA	OBSCN	3397, 3514	1	1	0	no
BRCA	OBSCN	3954, 4098	2	0	1	no
BRCA	OBSCN	4143, 4286	1	0	2	no
BRCA	OBSCN	4835, 4997	0	1	1	no
BRCA	OBSCN	5107, 5215	1	1	0	no
BRCA	OBSCN	5931, 6011	1	0	1	no
BRCA	OBSCN	6068, 6230	0	2	0	no
BRCA	OBSCN	6600, 6727	1	0	0	no
BRCA	OBSCN	6995, 7156	2	0	0	no
BRCA	OTOF	408, 502	1	0	0	no
BRCA	OTOF	864, 1054	2	0	0	no
BRCA	OTOF	1060, 1169	1	0	0	no
BRCA	OTOF	1232, 1323	2	0	0	no
BRCA	OTOF	1548, 1761	1	0	0	no
BRCA	PABPC1	414, 545	2	0	0	no
BRCA	PARG	507, 900	1	0	0	no
BRCA	PBRM1	528, 666	1	0	0	no
BRCA	PBRM1	821, 890	1	0	0	no
BRCA	PBRM1	976, 1049	0	1	1	no
BRCA	PBRM1	1504, 1603	2	0	0	no
BRCA	PCDHA2	22, 82	1	0	1	no
BRCA	PCDHA2	144, 238	1	0	0	no
BRCA	PCDHA2	456, 522	1	0	2	no
BRCA	PCDHA2	668, 763	2	2	0	no
BRCA	PCDHA3	6, 50	3	0	0	no
BRCA	PCDHA3	61, 103	1	0	0	no
BRCA	PCDHA3	166, 323	2	1	0	no
BRCA	PCDHGA7	131, 186	2	0	0	no
BRCA	PCDHGA7	268, 380	1	0	0	no
BRCA	PCDHGA7	682, 745	1	0	3	no
BRCA	PCDHGA9	32, 218	2	1	0	no
BRCA	PCDHGA9	608, 729	0	1	1	no
BRCA	PCDHGB1	296, 394	2	0	1	no
BRCA	PCDHGB1	698, 763	1	0	1	no
BRCA	PCNXL2	122, 232	2	0	0	no
BRCA	PCNXL2	446, 585	1	0	0	no
BRCA	PCNXL2	835, 1037	3	0	0	no
BRCA	PCNXL2	1672, 1799	1	2	2	no
BRCA	PCNXL2	1869, 2041	1	0	0	no
BRCA	PDGFRA	487, 560	1	0	0	no
BRCA	PDGFRA	1013, 1088	1	0	0	no
BRCA	PDILT	316, 365	1	0	0	no
BRCA	PDZD7	101, 272	2	0	0	no
BRCA	PER3	61, 252	1	0	0	no
BRCA	PER3	643, 884	3	0	2	no
BRCA	PER3	898, 1162	2	0	5	no
BRCA	PHF14	617, 829	2	0	0	no
BRCA	PIK3CA	5, 12	0	4	0	no
BRCA	PIK3CA	81, 93	4	0	0	no
BRCA	PIK3CA	104, 111	4	0	0	no
BRCA	PIK3CA	115, 118	4	0	0	no
BRCA	PIK3CA	339, 350	20	0	0	yes
BRCA	PIK3CA	357, 378	5	0	0	yes
BRCA	PIK3CA	451, 456	7	2	1	yes
BRCA	PIK3CA	539, 547	121	0	0	yes
BRCA	PIK3CA	725, 726	9	0	0	yes
BRCA	PIK3CA	1004, 1029	6	0	0	yes
BRCA	PIK3CA	1043, 1049	147	0	0	yes
BRCA	PIK3R1	45, 102	0	3	0	no
BRCA	PIK3R1	329, 360	0	1	0	no
BRCA	PIK3R1	457, 472	0	1	0	no
BRCA	PIK3R1	617, 670	4	0	0	no
BRCA	PLAU	289, 411	1	0	1	no
BRCA	PLCG1	184, 375	1	0	2	no
BRCA	PLCG1	873, 1031	2	0	1	no
BRCA	PLCG1	1120, 1261	2	1	0	no
BRCA	PLEC	2791, 2921	1	0	1	no
BRCA	PLEC	2951, 3039	1	0	0	no
BRCA	PLEC	4192, 4352	1	0	0	no
BRCA	POLE	279, 297	2	0	0	no
BRCA	POLE	390, 436	2	0	0	no
BRCA	POLE	1030, 1256	1	0	0	no
BRCA	POLE	1534, 1752	1	0	1	no
BRCA	POLE	1826, 1930	1	0	0	no
BRCA	POM121	303, 473	2	0	0	no
BRCA	POM121	906, 985	2	0	1	no
BRCA	POM121	993, 1087	2	0	0	no
BRCA	PPARGC1B	103, 320	2	1	0	no
BRCA	PPARGC1B	614, 865	2	0	0	no
BRCA	PPIG	202, 383	1	1	1	no
BRCA	PPM1D	406, 598	0	1	1	no
BRCA	PPP2R1A	167, 183	1	0	0	no
BRCA	PSIP1	50, 151	1	3	1	no
BRCA	PSIP1	274, 354	1	0	0	no
BRCA	PSMD3	83, 207	1	0	2	no
BRCA	PTCH1	466, 571	1	0	0	no
BRCA	PTCH1	1043, 1223	5	0	1	yes
BRCA	PTCH1	1366, 1437	2	0	1	no
BRCA	PTEN	0, 10	1	1	0	no
BRCA	PTEN	20, 31	1	0	0	no
BRCA	PTEN	39, 52	1	3	0	no
BRCA	PTEN	61, 76	0	2	0	no
BRCA	PTEN	86, 93	2	1	0	no
BRCA	PTEN	116, 146	6	3	0	yes
BRCA	PTEN	162, 178	0	1	0	no
BRCA	PTPRF	524, 639	1	0	0	no
BRCA	PTPRF	871, 970	1	0	0	no
BRCA	PTPRF	1491, 1669	1	1	0	no
BRCA	PTPRF	1721, 1861	1	1	0	no
BRCA	RAB3GAP1	41, 149	1	0	1	no
BRCA	RAB3GAP1	681, 898	1	0	0	no
BRCA	RAD21	506, 596	1	0	1	no
BRCA	RAE1	186, 280	1	0	0	no
BRCA	RASA1	317, 449	1	0	0	no
BRCA	RASGRF2	138, 289	2	0	0	no
BRCA	RASIP1	601, 794	0	2	0	no
BRCA	RASIP1	830, 958	1	0	0	no
BRCA	RB1	53, 97	0	3	0	no
BRCA	RB1	251, 350	2	1	0	no
BRCA	RB1	436, 455	0	1	0	no
BRCA	RB1	536, 580	1	2	0	no
BRCA	RBBP6	91, 225	1	0	1	no
BRCA	RBBP6	496, 602	1	0	0	no
BRCA	RBBP6	974, 1161	2	0	0	no
BRCA	RBBP6	1218, 1367	1	0	0	no
BRCA	RBBP6	1433, 1598	1	0	0	no
BRCA	RET	547, 640	1	0	2	no
BRCA	RET	756, 893	2	0	0	no
BRCA	RHOA	22, 76	1	0	0	no
BRCA	RNF31	74, 237	0	1	0	no
BRCA	RNF31	378, 658	2	0	0	no
BRCA	RNF31	812, 924	1	0	0	no
BRCA	ROBO3	195, 509	3	0	3	no
BRCA	ROBO3	957, 1192	3	0	0	no
BRCA	RPTN	112, 244	4	0	0	no
BRCA	RPTN	489, 591	2	0	1	no
BRCA	RREB1	120, 611	3	0	3	no
BRCA	RREB1	1444, 1592	1	2	0	no
BRCA	RUNX1	80, 112	3	9	0	yes
BRCA	RUNX1	162, 239	2	3	1	yes
BRCA	SALL1	114, 161	2	0	1	no
BRCA	SALL1	422, 483	1	0	0	no
BRCA	SALL1	1050, 1194	0	1	0	no
BRCA	SBNO1	326, 450	1	1	1	no
BRCA	SDC1	106, 190	0	3	0	no
BRCA	SEMA3C	392, 495	0	1	1	no
BRCA	SEMA5B	218, 328	1	0	0	no
BRCA	SEMA5B	604, 707	1	0	0	no
BRCA	SEMA5B	986, 1124	2	0	0	no
BRCA	SEMG1	39, 158	1	0	0	no
BRCA	SEMG1	316, 417	1	1	0	no
BRCA	SETD2	432, 612	3	0	0	no
BRCA	SETD2	815, 944	1	1	0	no
BRCA	SETD2	1207, 1368	1	0	0	no
BRCA	SETD2	1478, 1541	2	0	0	no
BRCA	SETD2	1589, 1640	1	0	0	no
BRCA	SETD2	1690, 1876	2	0	0	no
BRCA	SETD2	2064, 2160	1	0	0	no
BRCA	SF3B1	576, 781	14	0	0	yes
BRCA	SGK1	1, 59	1	0	0	no
BRCA	SHOX2	111, 178	1	0	0	no
BRCA	SIN3A	80, 176	0	1	0	no
BRCA	SIN3A	537, 692	1	0	0	no
BRCA	SIN3A	790, 935	1	0	0	no
BRCA	SIN3A	1055, 1224	2	0	0	no
BRCA	SLC1A3	207, 318	3	0	0	no
BRCA	SLC26A3	131, 247	1	0	0	no
BRCA	SLC26A3	273, 391	1	0	0	no
BRCA	SLC26A3	495, 613	1	0	0	no
BRCA	SLC39A5	267, 377	1	0	1	no
BRCA	SLC4A3	48, 171	0	1	0	no
BRCA	SLC4A3	214, 363	1	0	0	no
BRCA	SLC4A3	856, 924	0	1	0	no
BRCA	SLITRK5	468, 549	2	0	0	no
BRCA	SLITRK5	579, 625	1	0	1	no
BRCA	SLITRK5	632, 692	1	0	0	no
BRCA	SMAD2	300, 335	1	0	0	no
BRCA	SMAD2	407, 464	1	2	0	no
BRCA	SMAD4	65, 144	2	0	0	no
BRCA	SMAD4	351, 363	1	0	0	no
BRCA	SMAD4	519, 544	0	1	0	no
BRCA	SMARCA4	966, 1068	1	0	0	no
BRCA	SMARCA4	1083, 1162	1	0	0	no
BRCA	SMARCA4	1211, 1267	0	2	0	no
BRCA	SMC3	21, 230	2	0	0	no
BRCA	SMC3	876, 984	1	0	0	no
BRCA	SMG7	421, 715	4	0	1	no
BRCA	SMG7	890, 1040	1	0	0	no
BRCA	SNED1	516, 1132	2	1	0	no
BRCA	SORBS2	467, 609	2	1	0	no
BRCA	SORBS2	683, 894	2	0	2	no
BRCA	SOS1	154, 309	1	1	0	no
BRCA	SOS1	1050, 1292	1	0	0	no
BRCA	SPAG9	271, 477	2	0	1	no
BRCA	SPAG9	568, 918	1	0	1	no
BRCA	SPAG9	1068, 1252	2	0	0	no
BRCA	SPEN	117, 314	1	1	0	no
BRCA	SPEN	561, 726	5	2	2	yes
BRCA	SPEN	756, 877	0	2	1	no
BRCA	SPEN	1395, 1537	0	2	1	no
BRCA	SPEN	1679, 1779	0	2	0	no
BRCA	SPEN	1934, 2081	2	2	1	no
BRCA	SPEN	2113, 2260	2	0	0	no
BRCA	SPEN	2562, 2624	2	2	0	no
BRCA	SPEN	2846, 3003	0	1	2	no
BRCA	SPEN	3249, 3403	1	2	0	no
BRCA	ST6GALNAC5	145, 220	1	0	0	no
BRCA	SUZ12	101, 228	1	1	0	no
BRCA	SUZ12	265, 383	3	0	0	no
BRCA	SV2A	129, 200	0	1	0	no
BRCA	SV2A	390, 454	1	0	0	no
BRCA	SYNGAP1	852, 1019	1	0	0	no
BRCA	TAF5	301, 452	0	1	0	no
BRCA	TAF5	558, 751	1	0	0	no
BRCA	TAOK2	113, 326	3	0	1	no
BRCA	TAP1	383, 657	2	0	0	no
BRCA	TBL1XR1	119, 181	0	5	0	yes
BRCA	TBL1XR1	302, 394	1	0	0	no
BRCA	TBX3	70, 129	2	3	0	yes
BRCA	TBX3	151, 224	2	6	0	yes
BRCA	TBX3	280, 418	1	4	1	yes
BRCA	TCEB3	408, 631	0	1	0	no
BRCA	TCF12	299, 523	2	0	0	no
BRCA	TCF7L2	382, 509	1	0	0	no
BRCA	TCP11L2	152, 295	1	1	0	no
BRCA	TCTE1	288, 375	2	0	1	no
BRCA	TDG	167, 339	1	0	0	no
BRCA	TET2	716, 849	1	0	0	no
BRCA	TEX2	768, 943	1	0	0	no
BRCA	TGFBR2	468, 531	1	1	0	no
BRCA	TGS1	607, 764	1	0	1	no
BRCA	THBS1	417, 755	1	1	1	no
BRCA	THBS1	974, 1149	1	2	2	no
BRCA	THBS4	6, 101	1	0	1	no
BRCA	THBS4	487, 680	2	0	1	no
BRCA	TMC4	14, 115	2	0	0	no
BRCA	TMEM175	128, 260	1	0	1	no
BRCA	TMPRSS6	270, 361	3	0	0	no
BRCA	TNRC18	577, 734	0	3	0	no
BRCA	TNRC18	1477, 1585	2	1	1	no
BRCA	TNRC18	1951, 2133	1	0	0	no
BRCA	TNRC18	2155, 2355	0	1	0	no
BRCA	TNRC6B	348, 504	3	1	0	no
BRCA	TNRC6B	668, 790	2	1	0	no
BRCA	TNRC6B	1061, 1310	2	1	1	no
BRCA	TNRC6B	1547, 1760	0	2	0	no
BRCA	TOX4	223, 452	1	0	0	no
BRCA	TP53	33, 39	5	0	0	yes
BRCA	TP53	103, 115	4	11	0	yes
BRCA	TP53	121, 127	3	2	1	yes
BRCA	TP53	130, 138	13	1	0	yes
BRCA	TP53	139, 144	4	1	0	yes
BRCA	TP53	146, 159	6	3	1	yes
BRCA	TP53	164, 187	36	15	0	yes
BRCA	TP53	192, 201	17	14	0	yes
BRCA	TP53	203, 216	12	9	0	yes
BRCA	TP53	218, 222	8	0	0	yes
BRCA	TP53	231, 240	8	0	0	yes
BRCA	TP53	241, 255	7	6	0	yes
BRCA	TP53	256, 260	1	2	0	no
BRCA	TP53	262, 265	2	0	0	no
BRCA	TP53	266, 279	28	3	1	yes
BRCA	TP53	280, 289	14	1	1	yes
BRCA	TP53	330, 335	0	3	0	no
BRCA	TP53	336, 344	3	8	0	yes
BRCA	TP53BP1	548, 773	4	0	0	no
BRCA	TP53BP1	819, 1049	1	0	0	no
BRCA	TP53BP1	1128, 1343	1	0	0	no
BRCA	TP53BP1	1430, 1578	3	0	0	no
BRCA	TP53BP1	1733, 1914	4	1	1	yes
BRCA	TPO	640, 712	1	0	0	no
BRCA	TPP2	417, 549	1	0	0	no
BRCA	TRERF1	780, 939	1	1	1	no
BRCA	TRERF1	1118, 1182	1	0	0	no
BRCA	TRIM9	410, 475	1	0	0	no
BRCA	TRIM9	612, 704	2	0	1	no
BRCA	TRIOBP	173, 373	3	0	1	no
BRCA	TRIOBP	963, 1125	3	0	0	no
BRCA	TRIOBP	1192, 1428	1	0	0	no
BRCA	TRIOBP	1460, 1660	0	1	1	no
BRCA	TSC1	129, 222	1	0	1	no
BRCA	TSC1	567, 882	1	0	0	no
BRCA	TSC2	115, 312	1	0	1	no
BRCA	TSC2	843, 1113	1	0	1	no
BRCA	TSC2	1395, 1558	3	1	0	no
BRCA	TSC22D2	419, 611	1	0	0	no
BRCA	TXNIP	139, 194	1	1	0	no
BRCA	UGP2	16, 101	1	1	0	no
BRCA	UGP2	169, 369	1	0	0	no
BRCA	UNC5A	143, 305	1	0	0	no
BRCA	UNC5A	649, 815	0	1	0	no
BRCA	UNC5D	224, 268	1	0	0	no
BRCA	UNC5D	355, 438	1	0	0	no
BRCA	UNC5D	653, 704	2	1	0	no
BRCA	USP28	178, 255	2	1	0	no
BRCA	USP42	82, 299	1	0	0	no
BRCA	VARS	419, 571	1	0	1	no
BRCA	VAV3	275, 386	2	0	0	no
BRCA	VEPH1	185, 266	1	0	0	no
BRCA	WHSC1L1	574, 714	2	1	1	no
BRCA	WHSC1L1	764, 910	1	0	2	no
BRCA	WHSC1L1	1062, 1222	1	0	0	no
BRCA	ZBTB20	190, 248	1	0	0	no
BRCA	ZBTB20	345, 504	1	0	1	no
BRCA	ZBTB20	681, 714	0	1	0	no
BRCA	ZBTB7B	3, 99	1	0	1	no
BRCA	ZBTB7C	110, 193	0	1	0	no
BRCA	ZBTB7C	265, 423	1	2	1	no
BRCA	ZFHX3	285, 417	1	0	0	no
BRCA	ZFHX3	777, 885	1	0	1	no
BRCA	ZFHX3	962, 1138	2	0	1	no
BRCA	ZFHX3	1860, 1944	1	1	0	no
BRCA	ZFHX3	2035, 2200	1	3	2	no
BRCA	ZFHX3	2585, 2737	1	0	0	no
BRCA	ZFHX3	3177, 3340	0	1	0	no
BRCA	ZFHX3	3498, 3668	1	0	0	no
BRCA	ZFP36L1	42, 129	1	3	0	no
BRCA	ZFP36L1	154, 245	1	2	0	no
BRCA	ZHX2	38, 127	3	0	0	no
BRCA	ZHX2	674, 790	1	0	1	no
BRCA	ZMIZ1	659, 860	1	0	0	no
BRCA	ZMYM2	20, 160	1	0	0	no
BRCA	ZMYM2	550, 700	1	1	0	no
BRCA	ZMYM2	758, 951	2	1	0	no
BRCA	ZMYM2	997, 1124	2	0	0	no
BRCA	ZMYM2	1158, 1348	1	0	0	no
BRCA	ZMYM5	140, 341	2	0	0	no
BRCA	ZNF263	325, 420	3	0	0	no
BRCA	ZNF334	495, 597	2	0	1	no
BRCA	ZNF337	243, 456	2	0	0	no
BRCA	ZNF362	121, 205	1	3	0	no
BRCA	ZNF385B	1, 69	0	1	0	no
BRCA	ZNF471	223, 456	2	0	0	no
BRCA	ZNF485	143, 318	2	0	0	no
BRCA	ZNF598	93, 273	1	0	0	no
BRCA	ZNF606	588, 719	3	0	0	no
BRCA	ZNF644	21, 154	2	0	0	no
BRCA	ZNF644	212, 324	0	1	0	no
BRCA	ZNF644	367, 524	1	1	0	no
BRCA	ZNF687	927, 1114	1	1	0	no
BRCA	ZNF721	271, 438	3	0	1	no
BRCA	ZNF781	106, 223	1	2	2	no
BRCA	ZNF814	664, 808	1	0	2	no
BRCA	ZRANB3	391, 704	2	0	1	no
BRCA	ZRANB3	886, 1069	2	0	1	no
CESC	AATK	332, 691	2	0	0	no
CESC	AATK	888, 1074	0	1	1	no
CESC	ACVR1B	316, 412	1	0	0	no
CESC	ADNP	154, 306	0	1	0	no
CESC	AHCYL1	202, 415	2	0	0	no
CESC	AHNAK2	361, 490	1	0	0	no
CESC	AHNAK2	2674, 2754	1	0	0	no
CESC	AHNAK2	2851, 2951	2	0	1	no
CESC	AHNAK2	3858, 3915	1	0	0	no
CESC	AHNAK2	4210, 4309	1	0	0	no
CESC	AHNAK2	4341, 4446	1	0	0	no
CESC	AHNAK2	5196, 5379	3	0	0	no
CESC	AKT2	289, 429	1	0	0	no
CESC	ALPK2	92, 210	1	0	0	no
CESC	ALPK2	508, 626	1	0	0	no
CESC	ALPK2	1244, 1329	2	0	0	no
CESC	AMDHD1	189, 290	2	0	0	no
CESC	ANKRD12	537, 812	9	3	1	yes
CESC	ANKRD12	843, 961	5	0	0	yes
CESC	ANKRD12	1154, 1342	1	0	1	no
CESC	APC	1519, 1583	1	0	0	no
CESC	AQP12A	7, 70	1	0	0	no
CESC	ARAP3	1329, 1464	0	1	0	no
CESC	ARHGAP18	116, 266	1	0	1	no
CESC	ARHGAP35	8, 109	2	0	0	no
CESC	ARID1A	457, 515	0	3	0	no
CESC	ARID1A	521, 576	0	2	0	no
CESC	ARID1A	727, 802	0	1	0	no
CESC	ARID1A	992, 1049	1	0	0	no
CESC	ARID1A	1324, 1342	1	0	0	no
CESC	ARID1A	1424, 1528	0	1	0	no
CESC	ARID1A	1989, 1994	0	2	0	no
CESC	ARID5B	143, 295	1	0	0	no
CESC	ARID5B	372, 511	0	1	0	no
CESC	ARID5B	981, 1044	1	0	0	no
CESC	ASXL1	480, 906	1	1	0	no
CESC	ASXL1	1246, 1336	1	0	0	no
CESC	ASXL2	582, 742	1	1	0	no
CESC	ASXL2	1010, 1239	2	0	0	no
CESC	ATAD5	45, 138	1	0	1	no
CESC	ATAD5	296, 526	2	0	0	no
CESC	ATM	597, 749	2	0	0	no
CESC	ATM	1381, 1500	1	0	0	no
CESC	ATM	2363, 2494	1	0	0	no
CESC	ATM	2987, 3032	0	1	0	no
CESC	ATXN1	322, 379	2	0	0	no
CESC	ATXN1	619, 713	1	0	0	no
CESC	BAP1	163, 324	0	2	0	no
CESC	BMP2K	288, 431	1	0	0	no
CESC	BRDT	136, 246	2	0	0	no
CESC	BRDT	712, 888	1	0	0	no
CESC	BTBD11	769, 980	1	0	1	no
CESC	CAB39L	60, 214	1	0	0	no
CESC	CABYR	51, 227	1	0	0	no
CESC	CASP8	94, 128	1	1	1	no
CESC	CASP8	325, 409	1	1	0	no
CESC	CASP8	418, 471	0	2	0	no
CESC	CBFB	48, 112	1	0	0	no
CESC	CCDC105	334, 468	2	0	0	no
CESC	CCND1	240, 293	1	0	0	no
CESC	CDC27	28, 130	0	1	0	no
CESC	CDC42EP1	68, 260	0	1	1	no
CESC	CDHR5	506, 687	1	0	0	no
CESC	CDK12	342, 602	2	0	0	no
CESC	CDK12	840, 939	1	0	0	no
CESC	CDKN2A	71, 89	1	0	0	no
CESC	CHD4	569, 659	2	0	0	no
CESC	CHD4	714, 820	1	0	0	no
CESC	CHD4	945, 1016	1	0	0	no
CESC	CHD4	1510, 1675	2	0	2	no
CESC	CHD8	284, 531	0	1	0	no
CESC	CHD8	599, 796	1	0	0	no
CESC	CHD8	1170, 1419	2	0	0	no
CESC	CHD8	1448, 1605	1	0	0	no
CESC	CHEK2	247, 433	1	0	0	no
CESC	CIC	435, 517	1	0	0	no
CESC	CIC	896, 1007	1	0	0	no
CESC	CIC	1221, 1432	1	0	0	no
CESC	CNTNAP1	113, 239	1	0	0	no
CESC	CNTNAP1	365, 437	1	0	0	no
CESC	CPS1	23, 116	1	0	0	no
CESC	CR1	162, 335	2	0	0	no
CESC	CR1	1719, 1839	1	0	0	no
CESC	CREBBP	174, 277	2	0	0	no
CESC	CREBBP	1038, 1152	0	2	0	no
CESC	CREBBP	1417, 1471	2	0	0	no
CESC	CSDE1	78, 212	0	1	0	no
CESC	CTBP2	198, 273	1	0	0	no
CESC	CTCF	256, 314	1	0	0	no
CESC	CTCF	482, 651	2	1	0	no
CESC	CTNNB1	25, 45	3	0	0	no
CESC	CTNND1	682, 788	2	0	1	no
CESC	CYP11B1	260, 422	1	0	0	no
CESC	CYP4F3	393, 499	1	0	0	no
CESC	DDX5	453, 556	2	0	0	no
CESC	DHX57	261, 474	2	0	0	no
CESC	DHX57	564, 806	1	0	0	no
CESC	DHX57	902, 1235	1	0	0	no
CESC	DLC1	19, 123	1	0	0	no
CESC	DLC1	152, 249	1	0	0	no
CESC	DLC1	272, 367	0	1	0	no
CESC	DLG1	6, 173	1	0	0	no
CESC	DLG1	662, 840	1	0	0	no
CESC	DNAH12	22, 504	1	1	1	no
CESC	DNAH12	905, 1210	0	1	0	no
CESC	DNER	499, 560	1	0	0	no
CESC	DNMT1	696, 1037	1	0	1	no
CESC	DNMT3A	359, 440	1	0	0	no
CESC	DSPP	304, 397	0	1	1	no
CESC	DSPP	1060, 1079	1	0	0	no
CESC	DSPP	1136, 1236	2	0	2	no
CESC	DYM	459, 639	2	0	0	no
CESC	ECM1	160, 262	1	0	0	no
CESC	EDC4	130, 286	1	0	0	no
CESC	EGFR	753, 792	1	0	0	no
CESC	ELF3	324, 366	1	1	0	no
CESC	EP300	207, 402	1	2	0	no
CESC	EP300	479, 648	1	2	1	no
CESC	EP300	708, 840	1	2	0	no
CESC	EP300	1095, 1237	1	0	0	no
CESC	EP300	1389, 1409	5	0	0	yes
CESC	EP300	1581, 1678	2	0	0	no
CESC	EPAS1	13, 92	2	0	0	no
CESC	EPHA2	302, 500	2	0	0	no
CESC	EPHA2	541, 680	1	0	0	no
CESC	EPS8L3	82, 257	1	0	0	no
CESC	ERBB2	305, 313	4	0	0	no
CESC	ERBB2	573, 705	1	0	0	no
CESC	ERBB2	767, 781	1	0	0	no
CESC	ERBB3	40, 623	8	0	0	yes
CESC	ERCC2	241, 312	1	0	0	no
CESC	ERCC3	32, 142	1	0	0	no
CESC	EZH2	207, 359	2	0	0	no
CESC	EZH2	662, 740	1	0	0	no
CESC	FAM65B	59, 233	1	1	0	no
CESC	FAM65B	253, 412	1	0	0	no
CESC	FAT1	223, 419	1	0	0	no
CESC	FAT1	460, 567	0	1	0	no
CESC	FAT1	1313, 1427	0	1	0	no
CESC	FAT1	2413, 2533	0	2	0	no
CESC	FAT1	3207, 3333	0	1	0	no
CESC	FAT1	3388, 3462	1	0	2	no
CESC	FAT1	4347, 4519	1	0	0	no
CESC	FAT2	331, 459	2	1	0	no
CESC	FAT2	557, 600	0	1	0	no
CESC	FAT2	1109, 1315	1	0	0	no
CESC	FAT2	1331, 1445	1	2	0	no
CESC	FAT2	3785, 3934	1	0	0	no
CESC	FAT2	3978, 4167	2	0	0	no
CESC	FBXW7	465, 465	4	0	0	no
CESC	FBXW7	479, 481	3	0	0	no
CESC	FBXW7	502, 526	3	2	0	yes
CESC	FBXW7	651, 667	1	0	1	no
CESC	FGFR2	203, 570	2	0	0	no
CESC	FN1	776, 890	1	1	0	no
CESC	FN1	1811, 1993	2	0	0	no
CESC	FOXP2	497, 591	1	0	0	no
CESC	FRMPD2	465, 558	1	0	0	no
CESC	FUBP1	1, 81	1	0	0	no
CESC	FUBP1	398, 480	1	0	0	no
CESC	GABBR1	29, 115	1	0	0	no
CESC	GABBR1	269, 408	1	0	1	no
CESC	GABBR1	623, 783	1	0	0	no
CESC	GIGYF2	158, 233	1	0	0	no
CESC	GNPTAB	587, 786	1	0	0	no
CESC	GPR128	292, 419	0	1	0	no
CESC	GPRIN2	39, 126	2	0	0	no
CESC	GRB7	160, 290	2	0	0	no
CESC	GUSB	330, 430	2	0	0	no
CESC	HIBCH	85, 232	1	0	0	no
CESC	HLA-A	23, 114	1	8	0	yes
CESC	HLA-B	98, 159	3	1	0	no
CESC	HLA-B	216, 266	0	1	0	no
CESC	HLA-C	113, 167	1	3	0	no
CESC	HNRNPM	203, 324	1	0	0	no
CESC	HRNR	423, 506	1	1	0	no
CESC	HRNR	1685, 1794	2	0	3	no
CESC	HRNR	2662, 2831	1	0	0	no
CESC	IBTK	5, 118	1	0	0	no
CESC	IL6ST	66, 256	1	0	1	no
CESC	INPP4B	215, 285	1	0	0	no
CESC	INPP4B	806, 906	2	0	1	no
CESC	INTS7	241, 398	1	0	1	no
CESC	IRF2	13, 64	1	0	0	no
CESC	IRS1	195, 263	1	0	1	no
CESC	IRX4	176, 230	2	0	0	no
CESC	ITGAL	208, 309	2	0	0	no
CESC	ITGAL	781, 889	1	0	0	no
CESC	JAKMIP2	34, 163	1	0	1	no
CESC	JAKMIP2	476, 558	1	0	0	no
CESC	KEAP1	231, 284	1	0	0	no
CESC	KIAA1211	109, 229	2	0	0	no
CESC	KIAA1211	1101, 1195	0	1	0	no
CESC	KIAA1804	430, 534	1	0	0	no
CESC	KIAA1804	626, 850	1	0	0	no
CESC	KIF19	747, 961	1	0	1	no
CESC	KIF20B	42, 158	0	1	0	no
CESC	KIF20B	442, 544	0	1	0	no
CESC	KIF20B	1700, 1818	2	0	0	no
CESC	KIT	468, 642	1	0	0	no
CESC	KIT	882, 973	1	0	0	no
CESC	KLF5	175, 255	1	0	0	no
CESC	KLHL1	221, 292	1	0	0	no
CESC	KLHL5	260, 404	1	0	0	no
CESC	KLHL8	262, 402	1	0	0	no
CESC	L1TD1	52, 138	1	0	0	no
CESC	LACTB	363, 502	1	0	0	no
CESC	LRIG1	266, 389	1	0	0	no
CESC	LZTR1	243, 324	1	0	0	no
CESC	MAP1S	46, 253	1	0	0	no
CESC	MAP3K1	1311, 1473	1	0	0	no
CESC	MCTP1	794, 947	1	0	0	no
CESC	MED1	423, 533	4	1	0	yes
CESC	MED1	984, 1154	2	1	0	no
CESC	MED23	314, 479	1	0	0	no
CESC	MED23	1075, 1242	1	0	0	no
CESC	MEPCE	203, 363	1	0	1	no
CESC	MET	187, 238	1	0	0	no
CESC	MGA	88, 274	0	1	1	no
CESC	MGA	424, 645	2	0	0	no
CESC	MGA	808, 1007	1	0	0	no
CESC	MKI67	234, 310	1	0	0	no
CESC	MKI67	1218, 1341	1	0	0	no
CESC	MKI67	1374, 1465	1	0	0	no
CESC	MKI67	2090, 2214	1	0	0	no
CESC	MLLT10	416, 515	0	1	0	no
CESC	MLLT10	777, 912	1	0	0	no
CESC	MSH4	170, 261	2	0	0	no
CESC	MSH6	1196, 1334	0	1	0	no
CESC	MTOR	298, 534	1	0	0	no
CESC	MTOR	989, 1160	1	0	0	no
CESC	MTOR	1426, 1483	1	0	0	no
CESC	MTOR	2206, 2230	2	0	0	no
CESC	MTOR	2407, 2532	2	0	1	no
CESC	MUC17	46, 133	1	0	0	no
CESC	MUC17	637, 704	0	1	0	no
CESC	MUC17	1589, 1673	1	0	1	no
CESC	MUC17	2368, 2498	1	0	0	no
CESC	MUC17	2558, 2669	2	0	0	no
CESC	MUC17	2718, 2790	1	0	0	no
CESC	MUC17	3644, 3815	3	0	0	no
CESC	MUC5B	796, 1040	1	0	0	no
CESC	MUC5B	1208, 1364	1	0	0	no
CESC	MUC5B	2568, 2688	2	0	1	no
CESC	MUC5B	3812, 3955	3	0	1	no
CESC	MUC5B	4355, 4388	1	0	0	no
CESC	MUC5B	4924, 5049	2	0	0	no
CESC	MUC5B	5081, 5301	1	0	1	no
CESC	MUC6	1272, 1386	1	0	0	no
CESC	MUC6	1417, 1544	1	0	0	no
CESC	MUC6	1676, 1737	1	0	0	no
CESC	MUC6	2196, 2290	1	0	0	no
CESC	MYH10	81, 175	1	0	0	no
CESC	MYH10	256, 397	0	1	1	no
CESC	MYH10	1293, 1482	1	0	1	no
CESC	MYH10	1557, 1670	1	0	0	no
CESC	MYH10	1821, 1976	2	0	1	no
CESC	MYH9	92, 234	0	1	1	no
CESC	MYH9	488, 567	1	0	0	no
CESC	MYH9	749, 877	2	1	0	no
CESC	MYH9	954, 1070	1	0	0	no
CESC	MYH9	1259, 1417	0	1	0	no
CESC	MYH9	1472, 1792	2	1	1	no
CESC	NAPSA	121, 324	1	0	0	no
CESC	NF1	304, 400	1	1	0	no
CESC	NF1	520, 666	0	1	0	no
CESC	NF1	700, 858	2	0	1	no
CESC	NF1	923, 1083	1	0	0	no
CESC	NF1	1391, 1530	0	1	0	no
CESC	NF1	2380, 2492	0	1	0	no
CESC	NFAT5	111, 263	2	0	0	no
CESC	NFAT5	1164, 1381	1	1	1	no
CESC	NFE2L2	24, 34	4	0	0	no
CESC	NFE2L2	77, 82	4	0	0	no
CESC	NFIL3	329, 395	1	0	0	no
CESC	NOM1	649, 828	2	0	0	no
CESC	NOTCH1	412, 513	2	0	0	no
CESC	NOTCH1	1063, 1165	1	0	0	no
CESC	NOTCH1	1305, 1523	4	0	0	no
CESC	NOTCH1	1980, 2085	0	1	0	no
CESC	NOTCH2	114, 238	1	0	0	no
CESC	NOTCH2	2219, 2359	2	0	0	no
CESC	NPTX1	162, 263	1	1	0	no
CESC	NSD1	425, 565	4	0	0	no
CESC	NSD1	589, 728	5	0	0	yes
CESC	NSD1	744, 874	0	1	3	no
CESC	NSD1	1122, 1218	3	0	2	no
CESC	NSD1	1594, 1757	1	2	0	no
CESC	NUP93	262, 486	1	0	0	no
CESC	OBSCN	495, 682	1	0	0	no
CESC	OBSCN	1155, 1274	1	0	0	no
CESC	OBSCN	2573, 2735	1	0	0	no
CESC	OBSCN	3136, 3292	1	0	0	no
CESC	OBSCN	3954, 4098	1	0	0	no
CESC	OBSCN	4143, 4286	1	0	1	no
CESC	OBSCN	5107, 5215	1	0	0	no
CESC	OBSCN	6068, 6230	1	0	0	no
CESC	OBSCN	6600, 6727	1	0	0	no
CESC	OBSCN	6995, 7156	3	1	0	no
CESC	PBRM1	528, 666	1	0	0	no
CESC	PCDHA2	22, 82	1	0	0	no
CESC	PCDHA2	144, 238	1	0	0	no
CESC	PCDHA2	456, 522	1	0	0	no
CESC	PCDHA2	668, 763	1	0	1	no
CESC	PCDHA3	6, 50	0	1	0	no
CESC	PCDHA3	538, 578	1	0	1	no
CESC	PCDHGB1	84, 157	1	0	0	no
CESC	PCDHGB1	296, 394	1	1	0	no
CESC	PCDHGB1	511, 597	1	0	0	no
CESC	PCDHGB1	698, 763	1	0	0	no
CESC	PCNXL2	122, 232	1	0	0	no
CESC	PCNXL2	446, 585	1	0	0	no
CESC	PDILT	11, 76	1	0	0	no
CESC	PDILT	316, 365	1	0	1	no
CESC	PDILT	469, 546	2	0	0	no
CESC	PDZD7	101, 272	1	0	0	no
CESC	PER3	643, 884	1	0	0	no
CESC	PER3	898, 1162	3	2	0	yes
CESC	PIK3CA	38, 39	1	0	0	no
CESC	PIK3CA	81, 93	3	0	0	no
CESC	PIK3CA	104, 111	2	0	0	no
CESC	PIK3CA	115, 118	1	0	0	no
CESC	PIK3CA	339, 350	2	0	0	no
CESC	PIK3CA	539, 547	39	0	0	yes
CESC	PIK3CA	725, 726	3	0	0	no
CESC	PIK3CA	1004, 1029	1	0	0	no
CESC	PIK3CA	1043, 1049	3	0	0	no
CESC	PIK3R1	457, 472	1	0	0	no
CESC	PIK3R1	576, 582	0	1	0	no
CESC	PLCG1	516, 652	1	0	1	no
CESC	PLCG1	664, 809	1	0	0	no
CESC	PLEC	1963, 2045	2	0	1	no
CESC	PLEC	2310, 2385	2	0	2	no
CESC	PLEC	2658, 2776	1	0	0	no
CESC	PLEC	2951, 3039	1	0	0	no
CESC	PLEC	3838, 4066	3	0	0	no
CESC	POLE	279, 297	2	0	0	no
CESC	POLE	1030, 1256	1	0	0	no
CESC	POLE	1534, 1752	1	0	0	no
CESC	POLE	1826, 1930	1	0	0	no
CESC	PPARGC1B	103, 320	2	0	0	no
CESC	PPARGC1B	614, 865	0	1	0	no
CESC	PPIG	202, 383	1	0	0	no
CESC	PPM1D	406, 598	1	1	0	no
CESC	PPP2R1A	391, 490	1	0	1	no
CESC	PSIP1	50, 151	2	0	0	no
CESC	PTCH1	1366, 1437	1	0	0	no
CESC	PTEN	61, 76	0	2	0	no
CESC	PTEN	116, 146	3	0	0	no
CESC	PTEN	162, 178	0	1	0	no
CESC	PTEN	229, 239	0	2	0	no
CESC	PTEN	245, 252	1	0	0	no
CESC	PTEN	307, 328	2	1	0	no
CESC	PTPRF	1721, 1861	1	0	0	no
CESC	RASA1	317, 449	1	0	0	no
CESC	RASA1	905, 1019	1	0	1	no
CESC	RASIP1	601, 794	3	0	0	no
CESC	RASIP1	830, 958	0	1	0	no
CESC	RB1	436, 455	1	0	0	no
CESC	RB1	695, 761	0	1	0	no
CESC	RB1	770, 802	0	1	0	no
CESC	RET	547, 640	1	0	1	no
CESC	RNF31	812, 924	1	0	0	no
CESC	ROBO3	195, 509	2	0	0	no
CESC	ROBO3	957, 1192	1	0	0	no
CESC	RREB1	120, 611	1	0	1	no
CESC	SALL1	1050, 1194	1	0	0	no
CESC	SBNO1	326, 450	1	0	0	no
CESC	SBNO1	1295, 1357	1	0	0	no
CESC	SDC1	106, 190	1	0	0	no
CESC	SEMA5B	358, 474	2	0	0	no
CESC	SETD2	815, 944	1	0	0	no
CESC	SETD2	1207, 1368	2	0	0	no
CESC	SETD2	1690, 1876	1	0	0	no
CESC	SETD2	2257, 2511	1	0	0	no
CESC	SEZ6L2	65, 258	1	0	0	no
CESC	SEZ6L2	725, 836	1	0	0	no
CESC	SGK223	34, 272	1	0	0	no
CESC	SIN3A	537, 692	2	0	0	no
CESC	SLC26A3	131, 247	2	0	1	no
CESC	SLC26A3	273, 391	1	0	0	no
CESC	SLC28A1	103, 249	2	0	0	no
CESC	SLC28A1	387, 542	1	0	0	no
CESC	SLC39A5	267, 377	2	0	0	no
CESC	SLC4A3	48, 171	1	0	0	no
CESC	SLC4A3	856, 924	0	2	0	no
CESC	SLITRK5	468, 549	1	0	0	no
CESC	SLITRK5	900, 958	1	0	0	no
CESC	SMAD2	300, 335	0	1	0	no
CESC	SMAD4	65, 144	1	0	0	no
CESC	SMAD4	351, 363	2	0	0	no
CESC	SMARCA4	740, 828	1	1	0	no
CESC	SMARCA4	966, 1068	1	0	0	no
CESC	SMG7	890, 1040	1	1	0	no
CESC	SNED1	516, 1132	4	0	1	no
CESC	SOS1	1050, 1292	3	0	0	no
CESC	SPAG9	1068, 1252	2	0	0	no
CESC	SPEN	376, 491	4	0	0	no
CESC	SPEN	561, 726	0	1	0	no
CESC	SPEN	756, 877	0	1	0	no
CESC	SPEN	1034, 1190	4	1	1	yes
CESC	SPEN	1395, 1537	6	0	0	yes
CESC	SPEN	1679, 1779	1	1	0	no
CESC	SPEN	2113, 2260	2	0	0	no
CESC	SPEN	3249, 3403	1	0	0	no
CESC	SPIRE2	287, 449	2	0	1	no
CESC	STK11	168, 221	2	0	0	no
CESC	STK11	227, 336	2	0	0	no
CESC	SYNGAP1	45, 173	1	0	1	no
CESC	TAF5	301, 452	1	0	0	no
CESC	TAOK2	113, 326	2	0	0	no
CESC	TAP1	383, 657	0	1	0	no
CESC	TBL1XR1	302, 394	2	0	0	no
CESC	TBX3	280, 418	1	0	0	no
CESC	TCEB3	408, 631	2	1	1	no
CESC	TCTE1	149, 236	1	0	0	no
CESC	TCTE1	288, 375	1	0	0	no
CESC	TET2	716, 849	2	1	0	no
CESC	TEX2	10, 142	2	0	0	no
CESC	TGFBR2	468, 531	1	1	0	no
CESC	THBS4	487, 680	1	0	0	no
CESC	TIGD4	270, 349	1	0	0	no
CESC	TMC4	14, 115	1	0	0	no
CESC	TMEM175	128, 260	2	0	0	no
CESC	TMPRSS6	270, 361	2	0	0	no
CESC	TNRC18	1477, 1585	2	0	0	no
CESC	TNRC18	1951, 2133	1	0	0	no
CESC	TNRC18	2155, 2355	2	0	0	no
CESC	TNRC6B	668, 790	1	0	0	no
CESC	TNRC6B	1061, 1310	1	0	0	no
CESC	TP53	33, 39	1	0	0	no
CESC	TP53	130, 138	1	0	1	no
CESC	TP53	164, 187	0	1	0	no
CESC	TP53	231, 240	1	0	0	no
[truncated: 8,520 more rows]

## Sheet: T4_cluster_cancer_statistics
cancer name	cancer code	total clusters	genes with clusters	average clusters / gene	average cluster length	combined length of all genes with clusters (amino acids)	combined length of all clusters(amino acids)	fraction of genes covered by clusters (amino acids)total mutations in genes with clusters	fraction mutations inside clusters	total non-synonymous mutations in genes with clusters	fraction non-synonymous mutations in clusters	% all muts in clusters / % genes covered by clusters	% non-synonymous muts in clusters / % genes covered by clusters
pan-cancer	global	1295	433	2.99076	119.779	551129	155114	0.281448	32334	0.511938	45253	0.52812	1.81895	1.34444
Adrenocortical carcinoma	ACC	988	282	3.50355	120.481	356525	119035	0.333876	789	0.54489	1116	0.52957	1.63201	1.22246
Bladder Urothelial Carcinoma	BLCA	1226	385	3.18442	118.296	443132	145031	0.327286	1125	0.504258	1789	0.508664	1.54073	1.24628
Breast invasive carcinoma	BRCA	1274	420	3.03333	119.668	474728	152457	0.321146	2672	0.553095	4084	0.56905	1.72225	1.49795
Cervical squamous cell carcinoma and endocervical adenocarcinoma	CESC	1174	374	3.13904	119.05	429105	139765	0.325713	1007	0.51039	1574	0.52859	1.56699	1.29468
Colon adenocarcinoma	COAD	1176	378	3.11111	118.185	435497	138986	0.319143	1555	0.527476	2370	0.539241	1.65279	1.35837
Glioblastoma multiforme	GBM	1052	300	3.50667	118.188	369495	124334	0.336497	774	0.580645	1093	0.591034	1.72556	1.44019
Head and Neck squamous cell carcinoma	HNSC	1266	411	3.08029	119.47	468180	151249	0.323057	1793	0.555108	2580	0.565116	1.7183	1.39725
Kidney Chromophobe	KICH	698	168	4.15476	120.019	240337	83773	0.348565	287	0.579798	375	0.584	1.66339	1.26927
Kidney renal clear cell carcinoma	KIRC	1159	342	3.38889	119.828	415943	138881	0.333894	923	0.540082	1441	0.543373	1.61752	1.37218
Kidney renal papillary cell carcinoma	KIRP	1053	305	3.45246	120.615	373315	127008	0.340217	439	0.508691	660	0.519697	1.4952	1.16823
Acute Myeloid Leukemia	LAML	369	78	4.73077	118.902	123359	43875	0.355669	132	0.315789	397	0.312343	0.887874	0.834063
Brain Lower Grade Glioma	LGG	915	250	3.66	113.495	312728	103848	0.332071	847	0.670625	1134	0.700176	2.01952	1.89315
Liver hepatocellular carcinoma	LIHC	1145	341	3.35777	120.995	405927	138539	0.34129	703	0.50979	1102	0.512704	1.49371	1.20049
Lung adenocarcinoma	LUAD	1276	421	3.03088	119.169	472400	152060	0.321888	2092	0.533946	3044	0.54205	1.65879	1.30832
Lung squamous cell carcinoma	LUSC	1248	398	3.13568	119.038	455587	148560	0.326085	1514	0.530112	2231	0.53922	1.62569	1.29175
Ovarian serous cystadenocarcinoma	OV	1029	295	3.48814	117.082	361632	120477	0.333148	648	0.594495	893	0.609183	1.78448	1.49808
Prostate adenocarcinoma	PRAD	966	276	3.5	117.499	335746	113504	0.338065	431	0.518029	688	0.542151	1.53233	1.32613
Rectum adenocarcinoma	READ	954	271	3.5203	116.152	324212	110809	0.341779	524	0.565264	782	0.565217	1.65389	1.39507
Skin Cutaneous Melanoma	SKCM	1246	413	3.01695	119.222	474446	148550	0.313102	3169	0.384308	5646	0.393022	1.22742	0.859465
Stomach adenocarcinoma	STAD	1278	426	3	120.034	482972	153403	0.317623	2761	0.515112	3958	0.525518	1.62177	1.22176
Thyroid carcinoma	THCA	700	173	4.04624	116.76	242649	81732	0.336832	455	0.744681	540	0.781481	2.21084	2.05049
Uterine Corpus Endometrial Carcinoma	UCEC	1287	427	3.01405	119.135	485203	153327	0.316006	4652	0.518965	7240	0.525967	1.64226	1.34431
Uterine Carcinosarcoma	UCS	876	227	3.85903	113.143	286691	99113	0.345714	336	0.555372	516	0.563953	1.60645	1.3913

## Sheet: T5_cancer_cluster_enrichment
Cancer	Gene	Cluster	Enrichment P-value	Odds	False Discovery Rate	# Samples containing mutations in the cluster and of the same tumor-type	# Samples containing mutations in the cluster and not of the same tumor-type	# Samples not containing mutations in the cluster and of the same tumor-type	# Samples not containing mutations in the cluster and not of the same tumor-type
THCA	BRAF	600, 601	1.52718e-203	49.8259	0.01	235	158	166	5561
UCEC	PTEN	116, 146	9.68169e-71	41.1962	0.01	74	60	174	5812
SKCM	NRAS	61, 61	1.5048e-60	27.0166	0.01	73	76	205	5766
BRCA	PIK3CA	1043, 1049	4.30815e-59	9.36361	0.01	147	96	826	5051
SKCM	BRAF	600, 601	3.10902e-58	11.9283	0.01	106	287	172	5555
UCEC	CTNNB1	25, 45	3.49193e-56	27.6559	0.01	66	76	182	5796
KIRC	VHL	103, 123	9.61836e-42	277.549	0.01	37	2	380	5701
ACC	ZFPM1	44, 48	1.19876e-38	2676.35	0.01	19	1	43	6057
ACC	LACTB	5, 5	8.36834e-38	inf	0.01	18	0	44	6058
ACC	GARS	31, 42	1.25027e-37	1337.95	0.01	19	2	43	6056
ACC	CCDC102A	96, 96	1.13493e-35	inf	0.01	17	0	45	6058
ACC	LRIG1	24, 26	1.50601e-33	inf	0.01	16	0	46	6058
ACC	USP42	760, 779	1.95621e-31	inf	0.01	15	0	47	6058
UCEC	PIK3R1	45, 102	5.14769e-29	32.1209	0.01	31	26	217	5846
KIRC	VHL	84, 94	1.27658e-26	inf	0.01	22	0	395	5703
ACC	MUC5B	682, 682	7.39361e-26	441.438	0.01	14	4	48	6054
KIRC	VHL	60, 70	1.96613e-25	inf	0.01	21	0	396	5703
ACC	ZNF517	309, 368	3.20815e-25	803.347	0.01	13	2	49	6056
STAD	PGM5	88, 98	5.59818e-24	176.06	0.01	18	3	201	5898
GBM	EGFR	288, 291	4.46649e-23	88.6996	0.01	20	5	263	5832
KIRC	VHL	154, 164	6.14023e-22	143.602	0.01	20	2	397	5701
LIHC	CTNNB1	25, 45	4.52295e-21	11.1606	0.01	34	108	164	5814
ACC	AMDHD1	3, 17	5.33247e-21	inf	0.01	10	0	52	6058
ACC	OBSCN	4515, 4516	5.33247e-21	inf	0.01	10	0	52	6058
ACC	ZFPM1	431, 445	5.33247e-21	inf	0.01	10	0	52	6058
PRAD	SPOP	131, 140	1.3098e-20	72.2593	0.01	18	6	243	5853
LGG	TP53	266, 279	1.9335e-20	5.74918	0.01	55	231	232	5602
UCEC	PTEN	307, 328	4.58814e-20	27.1222	0.01	22	21	226	5851
ACC	TPO	398, 457	5.3635e-19	217.556	0.01	11	6	51	6052
GBM	EGFR	592, 598	9.92942e-19	62.1096	0.01	17	6	266	5831
KIRC	VHL	71, 78	2.49794e-18	inf	0.01	15	0	402	5703
BRCA	PIK3CA	539, 547	3.37307e-18	2.99386	0.01	120	231	853	4916
LGG	CIC	174, 253	4.15399e-18	52.4032	0.01	17	7	270	5826
UCEC	FGFR2	203, 570	6.00748e-18	14.5167	0.01	25	45	223	5827
ACC	CLDN23	129, 253	4.07577e-17	193.974	0.01	10	6	52	6052
ACC	ERCC2	241, 312	9.82167e-17	166.236	0.01	10	7	52	6051
KIRC	VHL	128, 137	5.32737e-16	198.084	0.01	14	1	403	5702
KIRC	PBRM1	528, 666	6.63392e-16	32.1147	0.01	18	8	399	5695
LGG	CIC	1459, 1532	1.71921e-15	59.7744	0.01	14	5	273	5828
HNSC	CDKN2A	71, 89	3.29894e-15	13.5704	0.01	22	33	284	5781
LUSC	NFE2L2	24, 34	6.24809e-15	20.2629	0.01	17	31	160	5912
SKCM	KDR	1022, 1117	2.00135e-14	21.0745	0.01	17	18	261	5824
ACC	IDUA	280, 383	3.33782e-14	224.222	0.01	8	4	54	6054
ACC	RINL	256, 408	3.33782e-14	224.222	0.01	8	4	54	6054
BLCA	FGFR3	248, 254	3.62589e-14	99.75	0.01	10	5	120	5985
ACC	TRIOBP	1192, 1428	9.47376e-14	93.3499	0.01	9	11	53	6047
COAD	APC	1443, 1453	1.35332e-13	20.6602	0.01	15	31	139	5935
LAML	FLT3	814, 976	1.44439e-13	21.6317	0.01	15	23	178	5904
UCEC	PIK3CA	81, 93	2.66591e-13	14.2826	0.01	18	32	230	5840
UCEC	PIK3R1	576, 582	4.60409e-13	68.0886	0.01	11	4	237	5868
LGG	NOTCH1	37, 81	6.42809e-13	77.4517	0.01	11	3	276	5830
ACC	GPRIN2	352, 453	8.40883e-13	112.037	0.01	8	8	54	6050
ACC	SEMA5B	828, 910	8.40883e-13	112.037	0.01	8	8	54	6050
HNSC	JUB	279, 465	9.78015e-13	47.4204	0.01	12	5	294	5809
BRCA	GATA3	325, 334	2.17555e-12	86.0355	0.01	16	1	957	5146
UCEC	PTEN	229, 239	2.23239e-12	17.9368	0.01	15	21	233	5851
KIRC	VHL	183, 190	3.24838e-12	56.2963	0.01	12	3	405	5700
LGG	IDH2	172, 172	3.39113e-12	36.3179	0.01	12	7	275	5826
OV	TP53	241, 255	4.39105e-12	4.71707	0.01	36	154	280	5650
SKCM	KIAA1804	626, 850	4.84644e-12	20.6005	0.01	14	15	264	5827
CESC	PIK3CA	539, 547	8.1934e-12	4.39724	0.01	38	313	155	5614
KICH	MUC6	1417, 1544	9.29801e-12	143.536	0.01	7	5	59	6049
HNSC	NOTCH1	412, 513	9.9805e-12	16.5979	0.01	15	18	291	5796
STAD	RHOA	22, 76	1.12823e-11	26.2564	0.01	12	13	207	5888
SKCM	MUC17	3644, 3815	1.23017e-11	13.6606	0.01	16	26	262	5816
ACC	TSC22D2	419, 611	1.26581e-11	128.376	0.01	7	6	55	6052
ACC	ZNF628	146, 292	1.26581e-11	128.376	0.01	7	6	55	6052
BRCA	GATA3	390, 421	1.6661e-11	14.17	0.01	21	8	952	5139
COAD	APC	211, 216	2.1264e-11	21.8359	0.01	12	23	142	5943
KIRC	PBRM1	976, 1049	3.89398e-11	33.7659	0.01	12	5	405	5698
UCEC	ARID5B	372, 511	4.72761e-11	30.2358	0.01	11	9	237	5863
UCEC	CSDE1	78, 212	4.72761e-11	30.2358	0.01	11	9	237	5863
THCA	NRAS	61, 61	6.07728e-11	4.51454	0.01	34	115	367	5604
UCEC	ARID1A	1989, 1994	6.45629e-11	41.0784	0.01	10	6	238	5866
UCEC	CCND1	240, 293	6.45629e-11	41.0784	0.01	10	6	238	5866
UCEC	PIK3CA	38, 39	6.45629e-11	41.0784	0.01	10	6	238	5866
HNSC	CDKN2A	42, 58	1.57607e-10	14.6233	0.01	14	19	292	5795
UCS	PPP2R1A	167, 183	1.70065e-10	44.8312	0.01	8	22	49	6041
BLCA	CDKN1A	32, 69	1.89788e-10	56.0468	0.01	8	7	122	5983
UCEC	PTEN	333, 343	3.28272e-10	30.7983	0.01	10	8	238	5864
UCEC	CTCF	320, 418	4.23494e-10	17.5125	0.01	12	17	236	5855
UCEC	ARHGAP35	8, 109	4.28323e-10	44.1866	0.01	9	5	239	5867
BRCA	CBFB	48, 112	4.84463e-10	26.8476	0.01	15	3	958	5144
ACC	ATXN1	139, 248	5.41044e-10	59.1818	0.01	7	13	55	6045
COAD	APC	918, 984	6.76194e-10	22.9475	0.01	10	18	144	5948
COAD	APOB	1030, 1689	1.00999e-09	21.7361	0.01	10	19	144	5947
ACC	AATK	332, 691	1.37133e-09	92.6173	0.01	6	7	56	6051
LAML	DNMT3A	729, 839	1.6709e-09	21.5373	0.01	10	15	183	5912
UCEC	PTEN	61, 76	1.75054e-09	18.1229	0.01	11	15	237	5857
COAD	APC	542, 587	2.14167e-09	19.6594	0.01	10	21	144	5945
UCEC	ARHGAP35	965, 1039	2.27849e-09	31.5511	0.01	9	7	239	5865
KIRC	PBRM1	208, 298	2.66208e-09	22.0464	0.01	11	7	406	5696
SKCM	DNAH12	22, 504	3.5487e-09	11.8921	0.01	13	24	265	5818
LUAD	CPS1	464, 542	3.72948e-09	42.6136	0.01	8	5	221	5886
UCEC	POLE	279, 297	4.67165e-09	27.6025	0.01	9	8	239	5864
BLCA	RXRA	412, 443	5.03559e-09	48.6423	0.01	7	7	123	5983
READ	APC	1301, 1338	6.44113e-09	26.3213	0.01	8	30	61	6021
READ	APC	1277, 1298	6.94752e-09	37.8414	0.01	7	18	62	6033
ACC	SEZ6L2	65, 258	7.75741e-09	36.5879	0.01	7	21	55	6037
UCEC	MLL4	2548, 2712	9.01502e-09	24.5314	0.01	9	9	239	5863
KICH	MUC6	1835, 1927	1.40763e-08	54.9364	0.01	6	11	60	6043
UCEC	PIK3CA	539, 547	1.56122e-08	3.21378	0.01	38	313	210	5559
STAD	ZBTB20	681, 714	1.65249e-08	21.0321	0.01	9	12	210	5889
UCEC	PTEN	0, 10	1.65269e-08	22.0745	0.01	9	10	239	5862
UCEC	PTEN	86, 93	1.65269e-08	22.0745	0.01	9	10	239	5862
UCEC	KIF20B	42, 158	1.90615e-08	16.4062	0.01	10	15	238	5857
COAD	APC	1301, 1338	1.9619e-08	14.7272	0.01	10	28	144	5938
BRCA	GATA3	429, 443	2.00099e-08	13.416	0.01	15	6	958	5141
KIRC	BAP1	1, 60	2.44463e-08	15.4244	0.01	11	10	406	5693
KIRC	PBRM1	415, 523	2.44916e-08	19.993	0.01	10	7	407	5696
UCEC	PIK3CA	1043, 1049	3.1598e-08	3.65616	0.01	30	213	218	5659
ACC	DSPP	1060, 1079	3.99422e-08	88.4795	0.01	5	6	57	6052
KIRC	MTOR	1426, 1483	4.28851e-08	25.1382	0.01	9	5	408	5698
OV	TP53	266, 279	4.5409e-08	3.06231	0.01	38	248	278	5556
UCEC	L1TD1	601, 728	4.74091e-08	42.61	0.01	7	4	241	5868
THCA	HRAS	61, 61	4.86644e-08	8.58419	0.01	14	24	387	5695
UCEC	CTCF	482, 651	5.63311e-08	9.90169	0.01	12	30	236	5842
UCEC	ARID1A	2232, 2275	6.31443e-08	24.4333	0.01	8	8	240	5864
UCEC	PARG	507, 900	6.31443e-08	24.4333	0.01	8	8	240	5864
UCEC	ZNF485	143, 318	6.31443e-08	24.4333	0.01	8	8	240	5864
STAD	IRF2	13, 64	7.60705e-08	22.3355	0.01	8	10	211	5891
CESC	HLA-A	23, 114	7.70704e-08	21.3153	0.01	8	12	185	5915
UCEC	PTEN	39, 52	7.9943e-08	16.9717	0.01	9	13	239	5859
HNSC	HRAS	11, 13	1.03116e-07	17.5879	0.01	9	10	297	5804
UCEC	MSH4	802, 923	1.1512e-07	21.7148	0.01	8	9	240	5863
UCEC	PIK3R1	329, 360	1.1512e-07	21.7148	0.01	8	9	240	5863
UCEC	PPP2R1A	167, 183	1.46383e-07	12.2941	0.01	10	20	238	5852
COAD	APC	856, 887	1.98312e-07	17.1507	0.01	8	19	146	5947
UCEC	POLE	390, 436	2.00004e-07	19.54	0.01	8	10	240	5862
UCEC	RASA1	317, 449	2.00004e-07	19.54	0.01	8	10	240	5862
SKCM	CYP4F3	393, 499	2.13927e-07	15.0017	0.01	9	13	269	5829
KICH	MUC6	1676, 1737	2.32365e-07	55.0546	0.01	5	9	61	6045
BRCA	CDH1	144, 222	2.34064e-07	10.7195	0.01	14	7	959	5140
GBM	EGFR	45, 160	2.38884e-07	11.8417	0.01	10	18	273	5819
COAD	APC	1393, 1419	2.71756e-07	16.2904	0.01	8	20	146	5946
LUAD	KEAP1	137, 189	2.90567e-07	17.7345	0.01	8	12	221	5879
HNSC	CDKN2A	101, 114	3.11202e-07	8.4344	0.01	12	28	294	5786
HNSC	ZNF750	14, 96	3.23265e-07	19.4832	0.01	8	8	298	5806
BLCA	ERBB3	40, 623	3.25927e-07	6.96927	0.01	13	94	117	5896
UCEC	ZNF709	152, 272	3.33442e-07	17.7606	0.01	8	11	240	5861
SKCM	CR1	758, 917	3.3758e-07	13.9278	0.01	9	14	269	5828
ACC	SNED1	1164, 1408	3.63204e-07	48.2217	0.01	5	11	57	6047
READ	APC	1366, 1387	4.04632e-07	27.3469	0.01	6	21	63	6030
BRCA	MAP3K1	670, 795	4.08726e-07	11.603	0.01	13	6	960	5141
UCEC	ARID1A	1324, 1342	4.43871e-07	24.3361	0.01	7	7	241	5865
UCEC	RBM26	21, 194	4.43871e-07	24.3361	0.01	7	7	241	5865
ACC	RASIP1	601, 794	5.10546e-07	44.1959	0.01	5	12	57	6046
UCS	FBXW7	465, 465	5.25309e-07	17.92	0.01	7	47	50	6016
UCEC	PPIG	202, 383	5.36408e-07	16.2778	0.01	8	12	240	5860
UCEC	PIK3CA	104, 111	5.53379e-07	10.2381	0.01	10	24	238	5848
GBM	EGFR	187, 229	5.67391e-07	24.6479	0.01	7	6	276	5831
LGG	FUBP1	88, 206	6.24393e-07	24.2792	0.01	7	6	280	5827
LUSC	NFE2L2	77, 82	7.15221e-07	11.317	0.01	9	28	168	5915
SKCM	CACNG3	207, 255	7.78673e-07	12.1826	0.01	9	16	269	5826
UCEC	APC	2166, 2253	8.03636e-07	21.2905	0.01	7	8	241	5864
UCEC	PTEN	290, 301	8.03636e-07	21.2905	0.01	7	8	241	5864
UCEC	ZFHX3	2950, 3073	8.03636e-07	21.2905	0.01	7	8	241	5864
UCEC	ING1	339, 378	8.36377e-07	15.0231	0.01	8	13	240	5859
HNSC	NOTCH1	1063, 1165	9.65981e-07	22.6622	0.01	7	6	299	5808
STAD	MTOR	298, 534	9.78461e-07	19.4514	0.01	7	10	212	5891
SKCM	CDKN2A	101, 114	9.93689e-07	8.25817	0.01	11	29	267	5813
STAD	ERBB3	40, 623	1.00567e-06	5.03221	0.01	16	91	203	5810
SKCM	SGK223	34, 272	1.14395e-06	11.464	0.01	9	17	269	5825
UCEC	ADNP	154, 306	1.37957e-06	18.9216	0.01	7	9	241	5863
UCEC	ALPK2	508, 626	1.37957e-06	18.9216	0.01	7	9	241	5863
UCEC	ZFHX3	1860, 1944	1.37957e-06	18.9216	0.01	7	9	241	5863
LUSC	CDKN2A	101, 114	1.45863e-06	10.2166	0.01	9	31	168	5912
LIHC	CTNNB1	322, 354	1.51013e-06	26.4062	0.01	6	7	192	5915
STAD	LARP4B	145, 178	1.55271e-06	17.6801	0.01	7	11	212	5890
LGG	NOTCH1	412, 513	1.5586e-06	9.11945	0.01	10	23	277	5810
UCEC	DNAH12	905, 1210	1.624e-06	29.0926	0.01	6	5	242	5867
BRCA	RUNX1	80, 112	1.78729e-06	10.6993	0.01	12	6	961	5141
UCEC	PIK3CA	1004, 1029	1.87764e-06	13.0156	0.01	8	15	240	5857
LUSC	TP53	146, 159	1.89192e-06	5.05019	0.01	15	107	162	5836
GBM	PIK3R1	376, 399	1.96347e-06	18.4796	0.01	7	8	276	5829
UCEC	CSDE1	715, 784	2.26469e-06	17.0266	0.01	7	10	241	5862
UCEC	PSIP1	274, 354	2.26469e-06	17.0266	0.01	7	10	241	5862
UCEC	PTEN	20, 31	2.26469e-06	17.0266	0.01	7	10	241	5862
KIRP	ZNF814	320, 324	2.6831e-06	38.1667	0.01	5	5	156	5954
STAD	PCDHA3	469, 497	2.72721e-06	23.7183	0.01	6	7	213	5894
SKCM	MLL	2213, 2439	2.9757e-06	16.7409	0.01	7	9	271	5833
SKCM	CR1	1341, 1444	3.00665e-06	12.3344	0.01	8	14	270	5828
UCEC	DNAH12	2244, 2719	3.13813e-06	24.2397	0.01	6	6	242	5866
UCEC	MUC5B	3164, 3273	3.13813e-06	24.2397	0.01	6	6	242	5866
UCEC	MUC5B	4042, 4164	3.13813e-06	24.2397	0.01	6	6	242	5866
UCEC	OBSCN	5622, 5817	3.13813e-06	24.2397	0.01	6	6	242	5866
UCEC	TSC2	115, 312	3.13813e-06	24.2397	0.01	6	6	242	5866
COAD	APC	1366, 1387	3.24252e-06	14.1571	0.01	7	20	147	5946
COAD	APOB	2837, 3297	3.33007e-06	20.1149	0.01	6	12	148	5954
UCEC	PPP2R1A	237, 275	3.57859e-06	15.476	0.01	7	11	241	5861
HNSC	TP53	164, 187	3.92569e-06	2.69029	0.01	33	250	273	5564
SKCM	SMARCA4	1339, 1471	4.86337e-06	15.0642	0.01	7	10	271	5832
SKCM	TRIOBP	1460, 1660	4.86337e-06	15.0642	0.01	7	10	271	5832
LUSC	CYP11B1	75, 120	5.10605e-06	18.9219	0.01	6	11	171	5932
BRCA	MAP3K1	1036, 1147	5.35791e-06	13.3515	0.01	10	4	963	5143
COAD	APC	1105, 1128	5.46268e-06	12.8658	0.01	7	22	147	5944
UCEC	KIF20B	955, 1043	5.47159e-06	14.184	0.01	7	12	241	5860
UCEC	CDK17	151, 274	5.63094e-06	20.7733	0.01	6	7	242	5865
UCEC	FAT1	3597, 3707	5.63094e-06	20.7733	0.01	6	7	242	5865
UCEC	FUBP1	398, 480	5.63094e-06	20.7733	0.01	6	7	242	5865
LUAD	STK11	227, 336	6.00212e-06	19.7859	0.01	6	8	223	5883
STAD	ZNF628	505, 824	6.28373e-06	34.4451	0.01	5	4	214	5897
STAD	SMAD4	351, 363	6.78352e-06	8.38714	0.01	9	30	210	5871
STAD	HLA-B	216, 266	7.48818e-06	18.4413	0.01	6	9	213	5892
STAD	ZBTB20	345, 504	7.48818e-06	18.4413	0.01	6	9	213	5892
SKCM	TRIOBP	511, 679	7.65114e-06	13.6924	0.01	7	11	271	5831
UCEC	C9orf102	367, 557	8.12899e-06	13.0906	0.01	7	13	241	5859
UCEC	CHEK2	247, 433	8.12899e-06	13.0906	0.01	7	13	241	5859
UCEC	DYM	459, 639	8.12899e-06	13.0906	0.01	7	13	241	5859
LAML	U2AF1	24, 38	8.25687e-06	12.3545	0.01	7	18	186	5909
ACC	KIAA1984	144, 373	8.86202e-06	41.7103	0.01	4	10	58	6048
COAD	CDC27	531, 566	9.14299e-06	16.0838	0.01	6	15	148	5951
UCEC	GPR128	629, 760	9.52125e-06	18.1736	0.01	6	8	242	5864
UCEC	PIK3R1	617, 670	9.52125e-06	18.1736	0.01	6	8	242	5864
UCEC	ZNF334	495, 597	9.52125e-06	18.1736	0.01	6	8	242	5864
LUAD	EPS8L3	428, 561	9.69216e-06	17.5845	0.01	6	9	223	5882
ACC	DSPP	1088, 1127	9.76172e-06	153.966	0.01	3	2	59	6056
KIRC	PBRM1	821, 890	1.03581e-05	11.1355	0.01	8	10	409	5693
LUSC	KEAP1	449, 493	1.06661e-05	16.0054	0.01	6	13	171	5930
UCEC	NFIL3	329, 395	1.15754e-05	30.1852	0.01	5	4	243	5868
SKCM	TRIOBP	963, 1125	1.16471e-05	12.5492	0.01	7	12	271	5830
UCEC	MKI67	1598, 1698	1.17753e-05	12.1535	0.01	7	14	241	5858
UCEC	MSH4	448, 575	1.17753e-05	12.1535	0.01	7	14	241	5858
GBM	EGFR	246, 263	1.20913e-05	18.0402	0.01	6	7	277	5830
SKCM	BTBD11	624, 741	1.25269e-05	9.58683	0.01	8	18	270	5824
READ	APC	1393, 1419	1.2645e-05	20.4755	0.01	5	23	64	6028
KIRC	SETD2	1589, 1640	1.46345e-05	13.8927	0.01	7	7	410	5696
LUAD	STK11	168, 221	1.5025e-05	15.8233	0.01	6	10	223	5881
UCEC	ARID1A	664, 711	1.5333e-05	16.1515	0.01	6	9	242	5863
UCEC	FAT1	2579, 2638	1.5333e-05	16.1515	0.01	6	9	242	5863
UCEC	KLHL8	262, 402	1.5333e-05	16.1515	0.01	6	9	242	5863
UCEC	MLL2	1589, 1764	1.5333e-05	16.1515	0.01	6	9	242	5863
UCEC	MSH4	683, 777	1.5333e-05	16.1515	0.01	6	9	242	5863
UCEC	MYH10	81, 175	1.5333e-05	16.1515	0.01	6	9	242	5863
UCEC	PIK3R1	457, 472	1.5333e-05	16.1515	0.01	6	9	242	5863
UCEC	RBBP6	1218, 1367	1.5333e-05	16.1515	0.01	6	9	242	5863
UCEC	TPP2	596, 717	1.5333e-05	16.1515	0.01	6	9	242	5863
UCEC	ZMYM2	758, 951	1.5333e-05	16.1515	0.01	6	9	242	5863
UCEC	ZNF263	490, 609	1.5333e-05	16.1515	0.01	6	9	242	5863
UCEC	ZNF644	913, 1086	1.5333e-05	16.1515	0.01	6	9	242	5863
PRAD	FOXA1	237, 274	1.64631e-05	11.5059	0.01	7	14	254	5845
SKCM	CLIC6	430, 703	1.71074e-05	9.0807	0.01	8	19	270	5823
UCEC	PPM1D	406, 598	1.75049e-05	8.86364	0.01	8	22	240	5850
UCEC	ZNF471	223, 456	1.75049e-05	8.86364	0.01	8	22	240	5850
LUAD	ROBO3	195, 509	2.09913e-05	8.49376	0.01	8	25	221	5866
COAD	APC	757, 805	2.13025e-05	13.3964	0.01	6	18	148	5948
LGG	FUBP1	1, 81	2.20435e-05	15.5472	0.01	6	8	281	5825
UCEC	ARID1A	727, 802	2.31538e-05	10.6307	0.01	7	16	241	5856
UCEC	CHD4	945, 1016	2.31538e-05	10.6307	0.01	7	16	241	5856
UCEC	PIK3CA	115, 118	2.31538e-05	10.6307	0.01	7	16	241	5856
UCEC	CAB39L	60, 214	2.3705e-05	14.5339	0.01	6	10	242	5862
LAML	RUNX1	162, 239	2.4386e-05	13.5516	0.01	6	14	187	5913
SKCM	MLL3	782, 845	2.48463e-05	10.7528	0.01	7	14	271	5828
STAD	PCDHGB5	490, 580	2.53719e-05	13.8239	0.01	6	12	213	5889
KICH	MUC6	1972, 2021	2.64277e-05	29.9801	0.01	4	13	62	6041
LUSC	ASB5	245, 303	3.09768e-05	19.1667	0.01	5	9	172	5934
UCS	TP53	203, 216	3.14155e-05	6.57924	0.01	9	168	48	5895
HNSC	CDKN2A	118, 129	3.17802e-05	14.515	0.01	6	8	300	5806
HNSC	PLEC	2658, 2776	3.22871e-05	24.1279	0.01	5	4	301	5810
LUAD	HRNR	423, 506	3.26992e-05	13.1816	0.01	6	12	223	5879
LUAD	SETD2	1478, 1541	3.26992e-05	13.1816	0.01	6	12	223	5879
ACC	CRIPAK	133, 167	3.36739e-05	76.9576	0.01	3	4	59	6054
BRCA	CDH1	644, 733	3.41395e-05	7.34524	0.01	11	8	962	5139
UCEC	PIK3CA	5, 12	3.53998e-05	13.2104	0.01	6	11	242	5861
UCEC	RAB3GAP1	190, 325	3.53998e-05	13.2104	0.01	6	11	242	5861
UCEC	SGK1	1, 59	3.53998e-05	13.2104	0.01	6	11	242	5861
UCS	CHD4	1087, 1138	3.59755e-05	26.8413	0.01	4	17	53	6046
STAD	ZFHX3	777, 885	3.61538e-05	19.6729	0.01	5	7	214	5894
OV	TP53	192, 201	3.89053e-05	3.12074	0.01	20	123	296	5681
UCEC	MLL4	1803, 1891	3.96892e-05	20.1166	0.01	5	6	243	5866
SKCM	THBS1	417, 755	4.00336e-05	7.83838	0.01	8	22	270	5820
ACC	PABPC1	206, 345	4.09821e-05	26.0431	0.01	4	16	58	6042
COAD	SMAD4	351, 363	4.35738e-05	8.83036	0.01	7	32	147	5934
UCEC	PTEN	162, 178	4.71624e-05	7.49487	0.01	8	26	240	5846
SKCM	PPARGC1B	614, 865	4.84291e-05	9.40544	0.01	7	16	271	5826
HNSC	CASP8	52, 78	5.07537e-05	12.9	0.01	6	9	300	5805
HNSC	NOTCH1	1305, 1523	5.07537e-05	12.9	0.01	6	9	300	5805
HNSC	NSD1	1433, 1541	5.07537e-05	12.9	0.01	6	9	300	5805
UCEC	ITGAL	208, 309	5.13104e-05	12.1074	0.01	6	12	242	5860
UCEC	MLL4	262, 618	5.13104e-05	12.1074	0.01	6	12	242	5860
UCEC	PCDHGB1	189, 281	5.13104e-05	12.1074	0.01	6	12	242	5860
UCEC	SF3B1	847, 959	5.13104e-05	12.1074	0.01	6	12	242	5860
UCEC	SIN3A	790, 935	5.13104e-05	12.1074	0.01	6	12	242	5860
COAD	FBXW7	465, 465	5.22054e-05	7.05182	0.01	8	46	146	5920
KICH	PABPC1	206, 345	5.25046e-05	24.3468	0.01	4	16	62	6038
LIHC	KIF19	234, 389	5.31781e-05	17.0207	0.01	5	9	193	5913
COAD	DNMT1	352, 590	5.48586e-05	10.9533	0.01	6	22	148	5944
COAD	MAP2K4	224, 306	5.48586e-05	10.9533	0.01	6	22	148	5944
STAD	CNTNAP1	365, 437	5.70453e-05	17.2109	0.01	5	8	214	5893
STAD	MUC5B	5081, 5301	5.70453e-05	17.2109	0.01	5	8	214	5893
BLCA	TP53	280, 289	5.72322e-05	4.80754	0.01	11	113	119	5877
UCEC	PIK3CA	339, 350	5.81792e-05	5.44071	0.01	10	45	238	5827
SKCM	FGFR2	203, 570	6.09366e-05	4.49883	0.01	12	58	266	5784
LUAD	OR2L8	116, 153	6.40997e-05	11.2947	0.01	6	14	223	5877
SKCM	MLL2	1835, 2014	6.5741e-05	8.85066	0.01	7	17	271	5825
UCEC	DIAPH3	629, 735	6.5797e-05	17.2399	0.01	5	7	243	5865
UCEC	MLL4	1530, 1689	6.5797e-05	17.2399	0.01	5	7	243	5865
UCEC	PHF14	617, 829	6.5797e-05	17.2399	0.01	5	7	243	5865
UCEC	PTPRF	1265, 1415	6.5797e-05	17.2399	0.01	5	7	243	5865
UCEC	SHOX2	111, 178	6.5797e-05	17.2399	0.01	5	7	243	5865
SKCM	BTBD11	769, 980	6.64549e-05	7.18272	0.01	8	24	270	5818
SKCM	PCNXL2	446, 585	6.74139e-05	11.6932	0.01	6	11	272	5831
SKCM	TNRC6B	1547, 1760	6.74139e-05	11.6932	0.01	6	11	272	5831
STAD	PLCG1	184, 375	6.77591e-05	11.0535	0.01	6	15	213	5886
CESC	EP300	1389, 1409	6.87415e-05	15.7367	0.01	5	10	188	5917
HNSC	PIK3CA	539, 547	6.93171e-05	2.24707	0.01	35	316	271	5498
UCEC	CHD4	181, 347	7.24667e-05	11.1742	0.01	6	13	242	5859
UCEC	CREBBP	2051, 2160	7.24667e-05	11.1742	0.01	6	13	242	5859
UCEC	TAP1	383, 657	7.24667e-05	11.1742	0.01	6	13	242	5859
UCEC	ZFHX3	544, 641	7.24667e-05	11.1742	0.01	6	13	242	5859
ACC	C9orf66	219, 283	7.96543e-05	51.2881	0.01	3	6	59	6052
SKCM	CDKN2A	42, 58	8.43098e-05	6.89422	0.01	8	25	270	5817
STAD	ATM	1381, 1500	8.61646e-05	15.296	0.01	5	9	214	5892
STAD	IRS1	42, 134	8.61646e-05	15.296	0.01	5	9	214	5892
STAD	ZFHX3	3177, 3340	8.61646e-05	15.296	0.01	5	9	214	5892
LUAD	MLL3	782, 845	8.6956e-05	10.5399	0.01	6	15	223	5876
SKCM	L1TD1	52, 138	8.77974e-05	8.35752	0.01	7	18	271	5824
READ	KIAA1804	430, 534	9.28947e-05	20.6256	0.01	4	18	65	6033
CESC	MED1	423, 533	9.74422e-05	14.3037	0.01	5	11	188	5916
UCEC	MSH6	912, 993	0.00010004	10.3743	0.01	6	14	242	5858
UCEC	TIGD4	270, 349	0.00010004	10.3743	0.01	6	14	242	5858
HNSC	NFE2L2	24, 34	0.000101034	5.13514	0.01	10	38	296	5776
UCEC	INPP4B	215, 285	0.000103401	15.0823	0.01	5	8	243	5864
UCEC	MUC17	451, 535	0.000103401	15.0823	0.01	5	8	243	5864
UCEC	SBNO1	1084, 1244	0.000103401	15.0823	0.01	5	8	243	5864
LUAD	KEAP1	231, 284	0.000106589	14.5883	0.01	5	9	224	5882
KIRC	PBRM1	1231, 1316	0.000106743	8.83459	0.01	7	11	410	5692
GBM	PTEN	333, 343	0.000107448	10.5144	0.01	6	12	277	5825
KIRC	PBRM1	115, 194	0.000109756	11.879	0.01	6	7	411	5696
KIRC	PBRM1	1504, 1603	0.000109756	11.879	0.01	6	7	411	5696
BRCA	SF3B1	576, 781	0.000110922	4.40532	0.01	14	17	959	5130
HNSC	NSD1	1952, 2017	0.000115243	10.5509	0.01	6	11	300	5803
BLCA	ARID1A	2011, 2052	0.000119802	21.097	0.01	4	9	126	5981
HNSC	PLEC	2100, 2124	0.000123838	inf	0.01	3	0	303	5814
LUSC	PPP2R1A	391, 490	0.000123935	22.8786	0.01	4	6	173	5937
BRCA	MAP3K1	1182, 1283	0.000126126	7.99948	0.01	9	6	964	5141
READ	KIAA1804	270, 371	0.000132667	18.5569	0.01	4	20	65	6031
UCEC	DDX5	453, 556	0.000135346	9.68099	0.01	6	15	242	5857
UCEC	EP300	1095, 1237	0.000135346	9.68099	0.01	6	15	242	5857
KICH	ZNF814	320, 324	0.000136217	41.1361	0.01	3	7	63	6047
SKCM	OTOF	71, 220	0.000136825	9.89084	0.01	6	13	272	5829
COAD	SMAD2	407, 464	0.000138859	12.479	0.01	5	16	149	5950
SKCM	CR1	1719, 1839	0.000149976	7.51919	0.01	7	20	271	5822
READ	APC	1443, 1453	0.000150728	11.452	0.01	5	41	64	6010
SKCM	CDKN2A	71, 89	0.000151356	4.8068	0.01	10	45	268	5797
STAD	MYH9	1472, 1792	0.000153578	9.20657	0.01	6	18	213	5883
UCEC	PSMD3	83, 207	0.000155556	13.4042	0.01	5	9	243	5863
KIRC	PBRM1	709, 798	0.00015919	8.09695	0.01	7	12	410	5691
UCEC	ASXL2	192, 505	0.000161764	6.08333	0.01	8	32	240	5840
UCEC	ZNF814	664, 808	0.000162004	24.0492	0.01	4	4	244	5868
BLCA	FGFR3	349, 456	0.000164973	18.9841	0.01	4	10	126	5980
BLCA	ASXL2	192, 505	0.00017363	8.47628	0.01	6	34	124	5956
STAD	PLEC	2951, 3039	0.000174501	21.9386	0.01	4	5	215	5896
STAD	MUC6	916, 1060	0.000177266	12.5106	0.01	5	11	214	5890
LUSC	CPS1	1004, 1207	0.000179083	8.65351	0.01	6	24	171	5919
UCEC	ARID1A	2104, 2198	0.000179846	9.07438	0.01	6	16	242	5856
UCEC	SETD2	1690, 1876	0.000179846	9.07438	0.01	6	16	242	5856
SKCM	MUC17	2368, 2498	0.000188081	9.18277	0.01	6	14	272	5828
SKCM	OTOF	864, 1054	0.000192296	7.1599	0.01	7	21	271	5821
BRCA	HRNR	1685, 1794	0.000193833	12.4251	0.01	7	3	966	5144
OV	TP53	231, 240	0.000198299	3.67376	0.01	13	67	303	5737
LGG	EGFR	246, 263	0.000206573	12.91	0.01	5	8	282	5825
LGG	FUBP1	492, 604	0.000206573	12.91	0.01	5	8	282	5825
LUAD	AHNAK2	902, 975	0.000218679	11.9318	0.01	5	11	224	5880
LUAD	NOTCH2	386, 507	0.000218679	11.9318	0.01	5	11	224	5880
LUAD	SALL1	28, 85	0.000218679	11.9318	0.01	5	11	224	5880
BLCA	ZFP36L1	154, 245	0.000221277	17.2554	0.01	4	11	126	5979
UCEC	GIGYF2	158, 233	0.000225668	12.0617	0.01	5	10	243	5862
UCEC	MGA	1203, 1348	0.000225668	12.0617	0.01	5	10	243	5862
UCEC	NAPSA	121, 324	0.000225668	12.0617	0.01	5	10	243	5862
UCEC	NOM1	649, 828	0.000225668	12.0617	0.01	5	10	243	5862
UCEC	RBBP6	91, 225	0.000225668	12.0617	0.01	5	10	243	5862
UCEC	TNRC6B	1061, 1310	0.000225668	12.0617	0.01	5	10	243	5862
UCEC	USP42	82, 299	0.000225668	12.0617	0.01	5	10	243	5862
UCEC	ZFHX3	962, 1138	0.000225668	12.0617	0.01	5	10	243	5862
UCEC	ZNF334	318, 391	0.000225668	12.0617	0.01	5	10	243	5862
BRCA	MAP3K1	305, 370	0.000229737	5.92823	0.01	10	9	963	5138
UCEC	ARAP3	357, 681	0.000232459	6.7932	0.01	7	25	241	5847
UCEC	TCP11L2	152, 295	0.000235149	8.53913	0.01	6	17	242	5855
UCEC	ZNF721	271, 438	0.000235149	8.53913	0.01	6	17	242	5855
BRCA	PIK3CA	339, 350	0.0002375	3.06521	0.01	20	35	953	5112
STAD	IRF2	79, 153	0.000243863	11.4661	0.01	5	12	214	5889
STAD	PLCG1	873, 1031	0.000243863	11.4661	0.01	5	12	214	5889
KICH	HLA-C	113, 167	0.000245899	31.9841	0.01	3	9	63	6045
BRCA	PIK3CA	725, 726	0.00024776	6.85536	0.01	9	7	964	5140
LUAD	MUC17	3043, 3155	0.000250238	8.31532	0.01	6	19	223	5872
SKCM	PCNXL2	1869, 2041	0.000253375	8.56912	0.01	6	15	272	5827
COAD	FBXW7	502, 526	0.000254669	6.40909	0.01	7	44	147	5922
UCS	PIK3CA	104, 111	0.000254745	15.1774	0.01	4	30	53	6033
ACC	DMKN	141, 282	0.000263462	30.7525	0.01	3	10	59	6048
SKCM	L1TD1	340, 471	0.000266281	11.8702	0.01	5	9	273	5833
LIHC	IL6ST	66, 256	0.000270595	10.9326	0.01	5	14	193	5908
COAD	DLC1	152, 249	0.000272868	10.5034	0.01	5	19	149	5947
COAD	SMAD2	300, 335	0.000272868	10.5034	0.01	5	19	149	5947
STAD	OTOF	1814, 1925	0.0002827	18.2791	0.01	4	6	215	5895
BLCA	MLL2	4399, 4583	0.000290205	15.8148	0.01	4	12	126	5978
CESC	PER3	898, 1162	0.000312022	10.4823	0.01	5	15	188	5912
COAD	CACNG3	117, 149	0.000317034	15.8827	0.01	4	10	150	5956
UCEC	ANKRD12	1154, 1342	0.000317469	10.9633	0.01	5	11	243	5861
UCEC	CTCF	256, 314	0.000317469	10.9633	0.01	5	11	243	5861
UCEC	EZH2	207, 359	0.000317469	10.9633	0.01	5	11	243	5861
UCEC	MKI67	1374, 1465	0.000317469	10.9633	0.01	5	11	243	5861
UCEC	MLL	1058, 1264	0.000317469	10.9633	0.01	5	11	243	5861
UCEC	MLL3	1162, 1269	0.000317469	10.9633	0.01	5	11	243	5861
UCEC	RASGRF2	459, 526	0.000317469	10.9633	0.01	5	11	243	5861
STAD	ARID1A	1424, 1528	0.000327898	10.5823	0.01	5	13	214	5888
STAD	MLL4	2548, 2712	0.000327898	10.5823	0.01	5	13	214	5888
STAD	MYH10	945, 1095	0.000327898	10.5823	0.01	5	13	214	5888
SKCM	GPRIN2	39, 126	0.000335252	8.03217	0.01	6	16	272	5826
SKCM	TP53BP1	548, 773	0.000335252	8.03217	0.01	6	16	272	5826
BLCA	TP53	203, 216	0.000347817	3.59014	0.01	12	165	118	5825
UCEC	ERBB3	40, 623	0.000350176	3.40036	0.01	13	94	235	5778
BLCA	CREBBP	1417, 1471	0.000373287	14.5958	0.01	4	13	126	5977
BLCA	MLL	2765, 2946	0.000373287	14.5958	0.01	4	13	126	5977
SKCM	SNED1	516, 1132	0.000379821	6.26169	0.01	7	24	271	5818
SKCM	MLL2	668, 829	0.000384695	10.6813	0.01	5	10	273	5832
SKCM	TRIM9	612, 704	0.000384695	10.6813	0.01	5	10	273	5832
UCEC	PCDHA3	166, 323	0.000385325	7.63767	0.01	6	19	242	5853
CESC	ZNF750	250, 351	0.000389033	15.6587	0.01	4	8	189	5919
LUSC	WHSC1L1	310, 518	0.000394129	15.2447	0.01	4	9	173	5934
LIHC	BAP1	163, 324	0.00039791	7.37125	0.01	6	25	192	5897
BLCA	PIK3CA	539, 547	0.000401962	2.73021	0.01	18	333	112	5657
LUAD	KLHL1	541, 611	0.00040339	10.0927	0.01	5	13	224	5878
LUAD	PCK1	273, 336	0.00040339	10.0927	0.01	5	13	224	5878
COAD	ACVR1B	316, 412	0.000405478	9.49984	0.01	5	21	149	5945
HNSC	TP53	280, 289	0.000410702	2.91494	0.01	16	108	290	5706
HNSC	NOTCH1	767, 893	0.000416669	10.7143	0.01	5	9	301	5805
STAD	TRERF1	611, 707	0.000431831	15.6651	0.05	4	7	215	5894
STAD	CHD4	1287, 1376	0.000432154	9.82477	0.05	5	14	214	5887
STAD	ZBTB7C	110, 193	0.000432154	9.82477	0.05	5	14	214	5887
UCEC	AHNAK2	5196, 5379	0.000434998	10.048	0.05	5	12	243	5860
UCEC	EMR1	628, 721	0.000434998	10.048	0.05	5	12	243	5860
UCEC	MSH6	1196, 1334	0.000434998	10.048	0.05	5	12	243	5860
UCEC	PPIG	510, 614	0.000434998	10.048	0.05	5	12	243	5860
UCEC	ZFHX3	285, 417	0.000434998	10.048	0.05	5	12	243	5860
SKCM	EPS8L3	82, 257	0.000436483	7.55839	0.05	6	17	272	5825
SKCM	MKL1	19, 116	0.000436483	7.55839	0.05	6	17	272	5825
UCEC	FAT1	3388, 3462	0.000455655	16.0273	0.05	4	6	244	5866
UCEC	IBTK	610, 752	0.000455655	16.0273	0.05	4	6	244	5866
UCEC	POLE	1826, 1930	0.000455655	16.0273	0.05	4	6	244	5866
UCEC	CHD8	1170, 1419	0.000484135	7.25455	0.05	6	20	242	5852
COAD	CREBBP	1614, 1767	0.000487629	9.0665	0.05	5	22	149	5944
ACC	CCDC150	200, 351	0.000504799	23.6441	0.05	3	13	59	6045
LUAD	PGM5	456, 522	0.000512082	14.9435	0.05	4	7	225	5884
LUAD	KEAP1	449, 493	0.000530919	9.37022	0.05	5	14	224	5877
SKCM	CDC27	177, 301	0.000538949	9.70862	0.05	5	11	273	5831
SKCM	HRNR	1894, 1936	0.000538949	9.70862	0.05	5	11	273	5831
SKCM	MUC17	2814, 2885	0.000538949	9.70862	0.05	5	11	273	5831
SKCM	OBSCN	3635, 3791	0.000538949	9.70862	0.05	5	11	273	5831
SKCM	OBSCN	6995, 7156	0.000538949	9.70862	0.05	5	11	273	5831
SKCM	SPIRE2	287, 449	0.000538949	9.70862	0.05	5	11	273	5831
SKCM	TPO	834, 906	0.000538949	9.70862	0.05	5	11	273	5831
STAD	C9orf102	367, 557	0.000559579	9.16822	0.05	5	15	214	5886
STAD	ZNF606	588, 719	0.000559579	9.16822	0.05	5	15	214	5886
SKCM	KIAA1804	270, 371	0.000560064	7.13725	0.05	6	18	272	5824
SKCM	RPTN	489, 591	0.000560064	7.13725	0.05	6	18	272	5824
UCS	FBXW7	479, 481	0.000566104	22.4	0.05	3	15	54	6048
READ	DNMT1	87, 269	0.000566443	22.875	0.05	3	12	66	6039
UCEC	CHD8	599, 796	0.00058257	9.2735	0.05	5	13	243	5859
UCEC	FCN1	218, 293	0.00058257	9.2735	0.05	5	13	243	5859
UCEC	MKI67	1218, 1341	0.00058257	9.2735	0.05	5	13	243	5859
UCEC	RB1	114, 170	0.00058257	9.2735	0.05	5	13	243	5859
UCEC	USP28	805, 979	0.00058257	9.2735	0.05	5	13	243	5859
UCEC	ZNF721	730, 854	0.00058257	9.2735	0.05	5	13	243	5859
LAML	FLT3	290, 595	0.000585381	6.75974	0.05	6	28	187	5899
HNSC	TP53	203, 216	0.000585846	2.51971	0.05	20	157	286	5657
UCEC	DNAH12	22, 504	0.00059795	5.65615	0.05	7	30	241	5842
KICH	CDC27	177, 301	0.000606887	22.1282	0.05	3	13	63	6041
KIRC	SETD2	2257, 2511	0.000625852	7.55408	0.05	6	11	411	5692
STAD	MKI67	1948, 2069	0.000629669	13.7047	0.05	4	8	215	5893
BRCA	FOXA1	237, 274	0.000646678	4.84848	0.05	10	11	963	5136
LUAD	TP53	280, 289	0.000687774	3.13397	0.05	13	111	216	5780
SKCM	FLT3	290, 595	0.000691246	5.56307	0.05	7	27	271	5815
READ	LACTB	363, 502	0.000691548	21.1119	0.05	3	13	66	6038
UCEC	APP	488, 595	0.000693349	13.7354	0.05	4	7	244	5865
UCEC	FAT1	460, 567	0.000693349	13.7354	0.05	4	7	244	5865
UCEC	IBTK	5, 118	0.000693349	13.7354	0.05	4	7	244	5865
UCEC	LRIG1	266, 389	0.000693349	13.7354	0.05	4	7	244	5865
UCEC	ZMYM2	20, 160	0.000693349	13.7354	0.05	4	7	244	5865
SKCM	MUC17	3043, 3155	0.000709201	6.76045	0.05	6	19	272	5823
COAD	VAV3	38, 123	0.00071062	12.2113	0.05	4	13	150	5953
STAD	FAT2	4, 152	0.000713272	8.59375	0.05	5	16	214	5885
ACC	SALL1	114, 161	0.000725012	20.4847	0.05	3	15	59	6043
HNSC	CASP8	418, 471	0.000728513	6.82	0.05	6	17	300	5797
SKCM	HRNR	653, 729	0.000735422	8.89805	0.05	5	12	273	5830
SKCM	MLL3	293, 329	0.000735422	8.89805	0.05	5	12	273	5830
SKCM	MUC17	2136, 2226	0.000735422	8.89805	0.05	5	12	273	5830
SKCM	MYH10	256, 397	0.000735422	8.89805	0.05	5	12	273	5830
SKCM	RPTN	112, 244	0.000735422	8.89805	0.05	5	12	273	5830
CESC	HLA-B	98, 159	0.000748598	12.5228	0.05	4	10	189	5917
UCEC	ARID1A	1708, 1734	0.00076475	8.60964	0.05	5	14	243	5858
UCEC	ATM	2060, 2164	0.00076475	8.60964	0.05	5	14	243	5858
UCEC	CHD8	1727, 1930	0.00076475	8.60964	0.05	5	14	243	5858
UCEC	GNPTAB	587, 786	0.00076475	8.60964	0.05	5	14	243	5858
UCEC	MLL3	2409, 2524	0.00076475	8.60964	0.05	5	14	243	5858
UCEC	PIK3CA	357, 378	0.00076475	8.60964	0.05	5	14	243	5858
GBM	PTEN	162, 178	0.000768829	5.4576	0.05	7	27	276	5810
BRCA	MAP3K1	431, 547	0.000778428	5.32988	0.05	9	9	964	5138
HNSC	FBXW7	502, 526	0.000822848	4.1645	0.05	9	42	297	5772
STAD	MKI67	3030, 3129	0.000834524	27.3056	0.05	3	3	216	5898
BLCA	EP300	1095, 1237	0.000878834	11.1541	0.05	4	17	126	5973
BRCA	CDH1	63, 113	0.000895635	6.08734	0.05	8	7	965	5140
STAD	DNMT1	696, 1037	0.000896468	8.08686	0.05	5	17	214	5884
STAD	PTCH1	590, 759	0.000896468	8.08686	0.05	5	17	214	5884
SKCM	EMR1	302, 400	0.000980855	8.21217	0.05	5	13	273	5829
SKCM	MUC17	3490, 3599	0.000980855	8.21217	0.05	5	13	273	5829
UCEC	AHCYL1	202, 415	0.00098632	8.03429	0.05	5	15	243	5857
UCEC	BTNL8	96, 209	0.00098632	8.03429	0.05	5	15	243	5857
UCEC	FN1	232, 384	0.00098632	8.03429	0.05	5	15	243	5857
UCEC	GIGYF2	54, 140	0.00098632	8.03429	0.05	5	15	243	5857
UCEC	IL6ST	439, 627	0.00098632	8.03429	0.05	5	15	243	5857
UCEC	RASGRF2	868, 978	0.00098632	8.03429	0.05	5	15	243	5857
UCEC	RUNX1	162, 239	0.00098632	8.03429	0.05	5	15	243	5857
ACC	HLA-A	23, 114	0.000998365	18.0688	0.05	3	17	59	6041
UCEC	ARID1A	457, 515	0.00100713	12.0164	0.05	4	8	244	5864
UCEC	DSPP	1136, 1236	0.00100713	12.0164	0.05	4	8	244	5864
UCEC	HHIPL1	94, 242	0.00100713	12.0164	0.05	4	8	244	5864
UCEC	INPP4B	633, 785	0.00100713	12.0164	0.05	4	8	244	5864
UCEC	LRIG1	535, 627	0.00100713	12.0164	0.05	4	8	244	5864
UCEC	MARK3	386, 544	0.00100713	12.0164	0.05	4	8	244	5864
UCEC	MED23	45, 170	0.00100713	12.0164	0.05	4	8	244	5864
UCEC	MKL1	228, 330	0.00100713	12.0164	0.05	4	8	244	5864
UCEC	MSH6	224, 383	0.00100713	12.0164	0.05	4	8	244	5864
UCEC	MUC5B	796, 1040	0.00100713	12.0164	0.05	4	8	244	5864
UCEC	MYH10	765, 888	0.00100713	12.0164	0.05	4	8	244	5864
UCEC	OBSCN	495, 682	0.00100713	12.0164	0.05	4	8	244	5864
HNSC	FAT1	1313, 1427	0.00101247	12.8212	0.05	4	6	302	5808
OV	TP53	130, 138	0.00104247	3.39549	0.05	11	61	305	5743
LUAD	KLHL1	98, 183	0.00104572	11.6188	0.05	4	9	225	5882
LUAD	MUC17	3256, 3329	0.00104572	11.6188	0.05	4	9	225	5882
LUAD	OBSCN	4835, 4997	0.00104572	11.6188	0.05	4	9	225	5882
LUAD	SEMG1	39, 158	0.00104572	11.6188	0.05	4	9	225	5882
LUAD	VAV3	275, 386	0.00104572	11.6188	0.05	4	9	225	5882
SKCM	BRDT	320, 409	0.00106716	12.1689	0.05	4	7	274	5835
BLCA	TP53	146, 159	0.00107422	3.86843	0.05	9	113	121	5877
LUAD	DHX57	261, 474	0.00109684	7.71271	0.05	5	17	224	5874
SKCM	FRMPD2	78, 195	0.00109797	6.1145	0.05	6	21	272	5821
GBM	PTEN	229, 239	0.00110206	5.07946	0.05	7	29	276	5808
STAD	EPS8L3	82, 257	0.00111252	7.63629	0.05	5	18	214	5883
STAD	MLL2	2311, 2483	0.00111252	7.63629	0.05	5	18	214	5883
COAD	PCDHGB5	197, 391	0.00111276	10.5796	0.05	4	15	150	5951
LUSC	TP53	241, 255	0.00112906	2.81435	0.05	14	176	163	5767
LUSC	AHNAK2	5196, 5379	0.00119814	10.5469	0.05	4	13	173	5930
LUSC	HRNR	806, 899	0.00119814	10.5469	0.05	4	13	173	5930
LUSC	MUC6	1972, 2021	0.00119814	10.5469	0.05	4	13	173	5930
STAD	ECM1	336, 459	0.00120337	10.96	0.05	4	10	215	5891
STAD	OTOF	1232, 1323	0.00120337	10.96	0.05	4	10	215	5891
STAD	PLEC	4361, 4461	0.00120337	10.96	0.05	4	10	215	5891
STAD	TRIM9	143, 219	0.00120337	10.96	0.05	4	10	215	5891
STAD	ZFHX3	2585, 2737	0.00120337	10.96	0.05	4	10	215	5891
HNSC	TP53	266, 279	0.00120705	2.0756	0.05	27	259	279	5555
UCEC	FAT1	223, 419	0.00125225	7.53086	0.05	5	16	243	5856
UCEC	FAT1	2971, 3136	0.00125225	7.53086	0.05	5	16	243	5856
UCEC	HNF1A	94, 210	0.00125225	7.53086	0.05	5	16	243	5856
UCEC	NUP93	262, 486	0.00125225	7.53086	0.05	5	16	243	5856
SKCM	NOTCH2	2219, 2359	0.00128229	7.62428	0.05	5	14	273	5828
SKCM	PCNXL2	835, 1037	0.00128229	7.62428	0.05	5	14	273	5828
SKCM	SALL1	1050, 1194	0.00128229	7.62428	0.05	5	14	273	5828
SKCM	THBS4	487, 680	0.00128229	7.62428	0.05	5	14	273	5828
LUAD	PPARGC1B	614, 865	0.00135933	7.28299	0.05	5	18	224	5873
COAD	ERBB3	40, 623	0.00140106	3.71654	0.05	9	98	145	5868
UCEC	CPS1	604, 656	0.00140878	10.6794	0.05	4	9	244	5863
UCEC	HIBCH	85, 232	0.00140878	10.6794	0.05	4	9	244	5863
UCEC	KIF20B	1700, 1818	0.00140878	10.6794	0.05	4	9	244	5863
UCEC	LZTR1	571, 723	0.00140878	10.6794	0.05	4	9	244	5863
UCEC	MGA	424, 645	0.00140878	10.6794	0.05	4	9	244	5863
UCEC	MUC5B	1464, 1632	0.00140878	10.6794	0.05	4	9	244	5863
UCEC	PCDHGA7	682, 745	0.00140878	10.6794	0.05	4	9	244	5863
UCEC	PER3	61, 252	0.00140878	10.6794	0.05	4	9	244	5863
UCEC	PSIP1	50, 151	0.00140878	10.6794	0.05	4	9	244	5863
UCEC	WHSC1L1	310, 518	0.00140878	10.6794	0.05	4	9	244	5863
UCEC	ZNF385B	115, 205	0.00140878	10.6794	0.05	4	9	244	5863
LUAD	EGFR	753, 792	0.00142137	10.4551	0.05	4	10	225	5881
LUAD	PCDHA3	338, 419	0.00142137	10.4551	0.05	4	10	225	5881
LUAD	SLC39A5	267, 377	0.00142137	10.4551	0.05	4	10	225	5881
LUSC	TP53	164, 187	0.00148806	2.42563	0.05	18	265	159	5678
LUSC	ZNF781	106, 223	0.001506	9.79191	0.05	4	14	173	5929
HNSC	MLL2	255, 415	0.00152878	10.9877	0.05	4	7	302	5807
HNSC	NSD1	744, 874	0.00152878	10.9877	0.05	4	7	302	5807
HNSC	PCDHGA7	585, 646	0.00152878	10.9877	0.05	4	7	302	5807
HNSC	SORBS2	340, 421	0.00152878	10.9877	0.05	4	7	302	5807
BRCA	TBX3	151, 224	0.00154351	5.32539	0.05	8	8	965	5139
SKCM	PCNXL2	1244, 1351	0.00154395	10.646	0.05	4	8	274	5834
UCEC	AHNAK2	655, 775	0.00156766	7.08666	0.05	5	17	243	5855
STAD	ASXL2	1010, 1239	0.00159532	9.96195	0.05	4	11	215	5890
STAD	MLL3	1982, 2082	0.00159532	9.96195	0.05	4	11	215	5890
STAD	MLL4	125, 192	0.00159532	9.96195	0.05	4	11	215	5890
STAD	MYH10	1821, 1976	0.00159532	9.96195	0.05	4	11	215	5890
STAD	SLITRK5	900, 958	0.00159532	9.96195	0.05	4	11	215	5890
LGG	TP53	146, 159	0.0016016	2.71842	0.05	14	108	273	5725
OV	TP53	218, 222	0.00160368	4.16162	0.05	8	36	308	5768
KIRP	MET	1009, 1148	0.00160826	9.46338	0.05	4	16	157	5943
LUSC	TP53	266, 279	0.00163377	2.39721	0.05	18	268	159	5675
SKCM	ACTL6B	156, 323	0.00164703	7.11477	0.05	5	15	273	5827
SKCM	BTNL8	96, 209	0.00164703	7.11477	0.05	5	15	273	5827
SKCM	CR1	162, 335	0.00164703	7.11477	0.05	5	15	273	5827
SKCM	JAKMIP2	250, 334	0.00164703	7.11477	0.05	5	15	273	5827
SKCM	JAKMIP2	476, 558	0.00164703	7.11477	0.05	5	15	273	5827
SKCM	MET	1009, 1148	0.00164703	7.11477	0.05	5	15	273	5827
SKCM	NF1	923, 1083	0.00164703	7.11477	0.05	5	15	273	5827
SKCM	PDGFRA	836, 948	0.00164703	7.11477	0.05	5	15	273	5827
SKCM	RASGRF2	138, 289	0.00164703	7.11477	0.05	5	15	273	5827
SKCM	ZNF606	588, 719	0.00164703	7.11477	0.05	5	15	273	5827
COAD	CHD4	1087, 1138	0.00165222	9.33176	0.05	4	17	150	5949
UCS	TP53	241, 255	0.00176764	4.49836	0.05	7	183	50	5880
BLCA	TXNIP	139, 194	0.00179066	15.6982	0.05	3	9	127	5981
STAD	RREB1	120, 611	0.00179809	5.33394	0.05	6	31	213	5870
READ	SMAD4	519, 544	0.00181185	14.4306	0.05	3	19	66	6032
LIHC	ALB	112, 197	0.00181619	9.37193	0.05	4	13	194	5909
UCEC	ATAD5	1423, 1802	0.00183587	5.36731	0.05	6	27	242	5845
LUSC	PCDHGB5	197, 391	0.00186495	9.13757	0.05	4	15	173	5928
LUSC	TRIOBP	963, 1125	0.00186495	9.13757	0.05	4	15	173	5928
BRCA	MUC5B	2748, 2905	0.00187488	7.97777	0.05	6	4	967	5143
LUAD	CPS1	365, 443	0.00188185	9.50303	0.05	4	11	225	5880
LUAD	TET2	75, 202	0.00188185	9.50303	0.05	4	11	225	5880
UCEC	ARID1A	1118, 1172	0.00191007	9.60984	0.05	4	10	244	5862
UCEC	ASB5	245, 303	0.00191007	9.60984	0.05	4	10	244	5862
UCEC	HNRNPM	519, 676	0.00191007	9.60984	0.05	4	10	244	5862
UCEC	MLL4	1251, 1463	0.00191007	9.60984	0.05	4	10	244	5862
UCEC	MTOR	989, 1160	0.00191007	9.60984	0.05	4	10	244	5862
UCEC	NSD1	1122, 1218	0.00191007	9.60984	0.05	4	10	244	5862
UCEC	SIN3A	80, 176	0.00191007	9.60984	0.05	4	10	244	5862
UCEC	ZFHX3	2585, 2737	0.00191007	9.60984	0.05	4	10	244	5862
UCEC	ASXL1	42, 229	0.0019378	6.69182	0.05	5	18	243	5854
UCEC	FAM65B	59, 233	0.0019378	6.69182	0.05	5	18	243	5854
LUAD	U2AF1	24, 38	0.00201919	6.55246	0.05	5	20	224	5871
UCEC	AHNAK2	4092, 4188	0.00203838	17.9633	0.05	3	4	245	5868
UCEC	MEN1	83, 160	0.00203838	17.9633	0.05	3	4	245	5868
STAD	CASP8	94, 128	0.00206801	9.13023	0.05	4	12	215	5889
STAD	MLL3	3347, 3524	0.00206801	9.13023	0.05	4	12	215	5889
STAD	MUC17	214, 328	0.00206801	9.13023	0.05	4	12	215	5889
STAD	MYH9	1259, 1417	0.00206801	9.13023	0.05	4	12	215	5889
STAD	NOTCH1	1906, 1977	0.00206801	9.13023	0.05	4	12	215	5889
STAD	PCNXL2	122, 232	0.00206801	9.13023	0.05	4	12	215	5889
STAD	SLC4A3	856, 924	0.00206801	9.13023	0.05	4	12	215	5889
STAD	TNRC18	2677, 2830	0.00206801	9.13023	0.05	4	12	215	5889
CESC	ERBB2	305, 313	0.00207268	8.93878	0.05	4	14	189	5913
UCEC	FLT3	290, 595	0.00215499	5.17473	0.05	6	28	242	5844
ACC	MAP7	428, 604	0.00218059	13.3419	0.05	3	23	59	6035
STAD	CRIPAK	257, 312	0.00221526	16.3778	0.05	3	5	216	5896
READ	APC	283, 332	0.00234322	13.0519	0.05	3	21	66	6030
READ	APC	757, 805	0.00234322	13.0519	0.05	3	21	66	6030
READ	SMAD2	300, 335	0.00234322	13.0519	0.05	3	21	66	6030
COAD	CASP8	418, 471	0.00235073	8.34667	0.05	4	19	150	5947
UCEC	FN1	1811, 1993	0.00236801	6.33853	0.05	5	19	243	5853
UCEC	NCOR1	1713, 1909	0.00236801	6.33853	0.05	5	19	243	5853
LGG	CIC	1221, 1432	0.00239648	6.44614	0.05	5	16	282	5817
LUAD	KDR	1166, 1319	0.00242489	6.23937	0.05	5	21	224	5870
LUAD	MLL3	338, 380	0.00242489	6.23937	0.05	5	21	224	5870
LUAD	ATM	2691, 2726	0.00243624	8.70963	0.05	4	12	225	5879
LUAD	ERBB2	767, 781	0.00243624	8.70963	0.05	4	12	225	5879
LUAD	OBSCN	3635, 3791	0.00243624	8.70963	0.05	4	12	225	5879
UCEC	KIAA1211	109, 229	0.00252258	8.73472	0.05	4	11	244	5861
UCEC	MTOR	1966, 2033	0.00252258	8.73472	0.05	4	11	244	5861
UCEC	RASA1	905, 1019	0.00252258	8.73472	0.05	4	11	244	5861
UCEC	SMC3	876, 984	0.00252258	8.73472	0.05	4	11	244	5861
UCEC	SUZ12	101, 228	0.00252258	8.73472	0.05	4	11	244	5861
UCEC	TMC4	14, 115	0.00252258	8.73472	0.05	4	11	244	5861
HNSC	TP53	192, 201	0.00254968	2.47059	0.05	16	127	290	5687
SKCM	NF1	1192, 1276	0.00259646	6.27559	0.05	5	17	273	5825
KICH	MLL3	338, 380	0.00260887	12.4865	0.05	3	23	63	6031
STAD	CTNND1	682, 788	0.00262928	8.42648	0.05	4	13	215	5888
STAD	FAT2	3448, 3565	0.00262928	8.42648	0.05	4	13	215	5888
STAD	IRX3	158, 273	0.00262928	8.42648	0.05	4	13	215	5888
STAD	MLL2	1200, 1290	0.00262928	8.42648	0.05	4	13	215	5888
STAD	PTEN	20, 31	0.00262928	8.42648	0.05	4	13	215	5888
COAD	APC	283, 332	0.0027663	7.928	0.05	4	20	150	5946
UCEC	L1TD1	52, 138	0.00286368	6.02058	0.05	5	20	243	5852
BLCA	MUC17	1319, 1376	0.002872	12.8397	0.05	3	11	127	5979
BLCA	MYH9	749, 877	0.002872	12.8397	0.05	3	11	127	5979
STAD	FBXW7	465, 465	0.00288658	4.11261	0.05	7	47	212	5854
SKCM	AHNAK2	1868, 1978	0.00290511	8.51387	0.05	4	10	274	5832
SKCM	FRMPD2	275, 421	0.00290511	8.51387	0.05	4	10	274	5832
SKCM	MET	469, 626	0.00290511	8.51387	0.05	4	10	274	5832
SKCM	RBBP6	496, 602	0.00290511	8.51387	0.05	4	10	274	5832
COAD	DSPP	1136, 1236	0.00290891	13.1501	0.05	3	9	151	5957
STAD	TP53	164, 187	0.00292671	2.1545	0.05	20	263	199	5638
ACC	CTNNB1	25, 45	0.0029659	4.66544	0.05	6	136	56	5922
HNSC	FAT2	2085, 2196	0.00305891	8.54305	0.05	4	9	302	5805
READ	FBXW7	465, 465	0.00306259	7.38585	0.05	4	50	65	6001
LUAD	BTBD11	357, 473	0.00309341	8.03829	0.05	4	13	225	5878
LUAD	MLL3	293, 329	0.00309341	8.03829	0.05	4	13	225	5878
GBM	EGFR	753, 792	0.00310022	8.35412	0.05	4	10	279	5827
GBM	PTEN	307, 328	0.00322593	4.08686	0.05	7	36	276	5801
COAD	PCDHA3	166, 323	0.00322956	7.54921	0.05	4	21	150	5945
STAD	ATAD5	45, 138	0.00323563	13.6458	0.05	3	6	216	5895
STAD	PLEC	3595, 3715	0.00323563	13.6458	0.05	3	6	216	5895
UCEC	AHNAK2	361, 490	0.00325762	8.00546	0.05	4	12	244	5860
UCEC	ALPK2	92, 210	0.00325762	8.00546	0.05	4	12	244	5860
UCEC	ATM	219, 284	0.00325762	8.00546	0.05	4	12	244	5860
UCEC	ATM	2691, 2726	0.00325762	8.00546	0.05	4	12	244	5860
UCEC	EZH2	662, 740	0.00325762	8.00546	0.05	4	12	244	5860
UCEC	FAM65B	253, 412	0.00325762	8.00546	0.05	4	12	244	5860
UCEC	FAT1	3207, 3333	0.00325762	8.00546	0.05	4	12	244	5860
UCEC	MGA	808, 1007	0.00325762	8.00546	0.05	4	12	244	5860
UCEC	NF1	420, 482	0.00325762	8.00546	0.05	4	12	244	5860
UCEC	NOTCH1	1906, 1977	0.00325762	8.00546	0.05	4	12	244	5860
UCEC	RREB1	1444, 1592	0.00325762	8.00546	0.05	4	12	244	5860
UCEC	SLC4A3	214, 363	0.00325762	8.00546	0.05	4	12	244	5860
LGG	CIC	896, 1007	0.00326271	8.23039	0.05	4	10	283	5823
SKCM	ROBO3	195, 509	0.00326735	4.75082	0.05	6	27	272	5815
STAD	ECM1	160, 262	0.00328682	7.82326	0.05	4	14	215	5887
STAD	ERBB2	305, 313	0.00328682	7.82326	0.05	4	14	215	5887
STAD	MGA	1492, 1761	0.00328682	7.82326	0.05	4	14	215	5887
STAD	MLL4	262, 618	0.00328682	7.82326	0.05	4	14	215	5887
STAD	RB1	114, 170	0.00328682	7.82326	0.05	4	14	215	5887
STAD	TRIOBP	511, 679	0.00328682	7.82326	0.05	4	14	215	5887
BLCA	NFE2L2	24, 34	0.00329766	5.53209	0.05	5	43	125	5947
READ	APC	856, 887	0.00330554	11.4148	0.05	3	24	66	6027
UCEC	NFE2L2	77, 82	0.00336551	4.67155	0.05	6	31	242	5841
UCEC	KDR	1166, 1319	0.00343024	5.7329	0.05	5	21	243	5851
BLCA	CRAT	96, 300	0.00353468	11.7677	0.05	3	12	127	5978
BLCA	CREBBP	631, 726	0.00353468	11.7677	0.05	3	12	127	5978
BLCA	ELF3	324, 366	0.00353468	11.7677	0.05	3	12	127	5978
BLCA	KDR	921, 992	0.00353468	11.7677	0.05	3	12	127	5978
BLCA	MLL	2561, 2725	0.00353468	11.7677	0.05	3	12	127	5978
BLCA	MLL2	5125, 5214	0.00353468	11.7677	0.05	3	12	127	5978
BRCA	FOXA1	144, 176	0.00357287	6.38097	0.1	6	5	967	5142
HNSC	TP53	33, 39	0.00379121	4.6312	0.1	6	25	300	5789
LAML	IDH1	132, 132	0.00379589	2.26007	0.1	18	258	175	5669
SKCM	KNDC1	346, 492	0.00382162	7.73855	0.1	4	11	274	5831
SKCM	MUC5B	1827, 1955	0.00382162	7.73855	0.1	4	11	274	5831
SKCM	SPEN	1934, 2081	0.00382162	7.73855	0.1	4	11	274	5831
STAD	CPS1	1004, 1207	0.00384311	5.49159	0.1	5	25	214	5876
LUAD	ALPK2	1833, 1971	0.00386199	7.46286	0.1	4	14	225	5877
LUAD	EMR1	483, 579	0.00386199	7.46286	0.1	4	14	225	5877
SKCM	SALL1	691, 818	0.00389024	5.61307	0.1	5	19	273	5823
LUSC	FAT2	1469, 1635	0.00389304	7.20901	0.1	4	19	173	5924
HNSC	PCDHA2	668, 763	0.00393969	5.66445	0.1	5	17	301	5797
STAD	DLC1	617, 866	0.00394494	4.46441	0.1	6	37	213	5864
GBM	RB1	436, 455	0.00407561	7.59335	0.1	4	11	279	5826
HNSC	NOTCH1	1980, 2085	0.00411581	7.68742	0.1	4	10	302	5804
HNSC	SBNO1	1295, 1357	0.00411581	7.68742	0.1	4	10	302	5804
UCEC	CTNND1	682, 788	0.00412612	7.3884	0.1	4	13	244	5859
UCEC	DIAPH3	997, 1153	0.00412612	7.3884	0.1	4	13	244	5859
UCEC	DSPP	304, 397	0.00412612	7.3884	0.1	4	13	244	5859
UCEC	EP300	1581, 1678	0.00412612	7.3884	0.1	4	13	244	5859
UCEC	FAT2	1786, 1884	0.00412612	7.3884	0.1	4	13	244	5859
UCEC	FAT2	3202, 3337	0.00412612	7.3884	0.1	4	13	244	5859
UCEC	IBTK	423, 575	0.00412612	7.3884	0.1	4	13	244	5859
UCEC	SLC26A3	273, 391	0.00412612	7.3884	0.1	4	13	244	5859
UCEC	TET2	509, 612	0.00412612	7.3884	0.1	4	13	244	5859
UCEC	TNRC6B	348, 504	0.00412612	7.3884	0.1	4	13	244	5859
UCEC	ZHX2	674, 790	0.00412612	7.3884	0.1	4	13	244	5859
COAD	DLC1	617, 866	0.00420783	5.2349	0.1	5	38	149	5928
KIRP	MKL1	439, 602	0.00420896	11.2956	0.1	3	10	158	5949
KIRP	MUC5B	3428, 3476	0.00420896	11.2956	0.1	3	10	158	5949
CESC	NSD1	425, 565	0.0042254	11.6822	0.1	3	8	190	5919
BLCA	CREBBP	1038, 1152	0.0042834	10.8607	0.1	3	13	127	5977
ACC	ZNF814	320, 324	0.00431289	25.2083	0.1	2	8	60	6050
LUSC	MUC5B	2174, 2315	0.00431592	11.3678	0.1	3	9	174	5934
LUSC	MUC5B	2568, 2688	0.00431592	11.3678	0.1	3	9	174	5934
LUSC	WHSC1L1	764, 910	0.00431592	11.3678	0.1	3	9	174	5934
UCS	TP53	164, 187	0.00434317	3.43629	0.1	8	275	49	5788
BRCA	PIK3CA	451, 456	0.00436895	3.68704	0.1	9	13	964	5134
SKCM	PLEC	1963, 2045	0.00437962	12.7353	0.1	3	5	275	5837
STAD	AHNAK2	3244, 3314	0.00450118	11.6944	0.1	3	7	216	5894
STAD	PPP2R1A	391, 490	0.00450118	11.6944	0.1	3	7	216	5894
STAD	USP42	324, 533	0.00450118	11.6944	0.1	3	7	216	5894
UCEC	AHNAK2	4594, 4697	0.00460512	11.9714	0.1	3	6	245	5866
UCEC	FAM63B	179, 413	0.00460512	11.9714	0.1	3	6	245	5866
UCEC	TCTE1	149, 236	0.00460512	11.9714	0.1	3	6	245	5866
COAD	PCDHGB1	511, 597	0.00463828	10.7556	0.1	3	11	151	5955
STAD	TP53	266, 279	0.00465973	2.12907	0.1	20	266	199	5635
LUAD	MUC17	2558, 2669	0.00475028	6.96415	0.1	4	15	225	5876
LUAD	SLITRK5	468, 549	0.00475028	6.96415	0.1	4	15	225	5876
UCEC	PCDHGA9	32, 218	0.00479769	5.2326	0.1	5	23	243	5849
HNSC	MLL2	2311, 2483	0.00483169	5.34884	0.1	5	18	301	5796
KICH	AHNAK2	1631, 1736	0.00487515	23.6172	0.1	2	8	64	6046
SKCM	AHNAK2	361, 490	0.00491585	7.09246	0.1	4	12	274	5830
SKCM	HRNR	1955, 1995	0.00491585	7.09246	0.1	4	12	274	5830
SKCM	MUC5B	3812, 3955	0.00491585	7.09246	0.1	4	12	274	5830
SKCM	SALL1	244, 322	0.00491585	7.09246	0.1	4	12	274	5830
SKCM	SNED1	1164, 1408	0.00491585	7.09246	0.1	4	12	274	5830
SKCM	ZBTB7C	265, 423	0.00491585	7.09246	0.1	4	12	274	5830
READ	ANKRD12	537, 812	0.00491911	9.7776	0.1	3	28	66	6023
READ	APC	542, 587	0.00491911	9.7776	0.1	3	28	66	6023
STAD	AHCYL1	202, 415	0.00492019	6.84302	0.1	4	16	215	5885
STAD	FAT1	4347, 4519	0.00492019	6.84302	0.1	4	16	215	5885
STAD	MED1	984, 1154	0.00492019	6.84302	0.1	4	16	215	5885
GBM	PTEN	116, 146	0.00504123	2.47949	0.1	14	120	269	5717
LUAD	AHNAK2	3244, 3314	0.00510474	11.158	0.1	3	7	226	5884
LUAD	PCDHA2	548, 582	0.00510474	11.158	0.1	3	7	226	5884
BLCA	KLF5	175, 255	0.00512128	10.0832	0.1	3	14	127	5976
BLCA	RAB3GAP1	190, 325	0.00512128	10.0832	0.1	3	14	127	5976
UCEC	ARID1A	992, 1049	0.00513856	6.85948	0.1	4	14	244	5858
UCEC	ARID1A	1424, 1528	0.00513856	6.85948	0.1	4	14	244	5858
UCEC	ECM1	160, 262	0.00513856	6.85948	0.1	4	14	244	5858
UCEC	EDC4	130, 286	0.00513856	6.85948	0.1	4	14	244	5858
UCEC	FAT2	331, 459	0.00513856	6.85948	0.1	4	14	244	5858
UCEC	MAP3K1	431, 547	0.00513856	6.85948	0.1	4	14	244	5858
UCEC	MCTP1	794, 947	0.00513856	6.85948	0.1	4	14	244	5858
UCEC	MUC17	3490, 3599	0.00513856	6.85948	0.1	4	14	244	5858
UCEC	POLE	1030, 1256	0.00513856	6.85948	0.1	4	14	244	5858
UCEC	SIN3A	537, 692	0.00513856	6.85948	0.1	4	14	244	5858
ACC	MLL4	1803, 1891	0.00523704	22.4037	0.1	2	9	60	6049
GBM	LZTR1	68, 163	0.00523913	6.95938	0.1	4	12	279	5825
HNSC	EP300	1389, 1409	0.00539442	6.98736	0.1	4	11	302	5803
HNSC	NSD1	1594, 1757	0.00539442	6.98736	0.1	4	11	302	5803
COAD	TP53	164, 187	0.00545032	2.29437	0.1	15	268	139	5698
LUSC	CPS1	604, 656	0.00549245	10.2293	0.1	3	10	174	5933
LUSC	FN1	1451, 1643	0.00549245	10.2293	0.1	3	10	174	5933
LUSC	MUC17	1589, 1673	0.00549245	10.2293	0.1	3	10	174	5933
CESC	HLA-C	113, 167	0.00550419	10.3825	0.1	3	9	190	5918
SKCM	KDR	1166, 1319	0.00558984	5.07675	0.1	5	21	273	5821
UCEC	JAKMIP2	34, 163	0.00560931	5.01372	0.1	5	24	243	5848
UCEC	RNF31	378, 658	0.00560931	5.01372	0.1	5	24	243	5848
COAD	CNTNAP1	750, 869	0.00569188	9.85762	0.1	3	12	151	5954
COAD	ELF3	324, 366	0.00569188	9.85762	0.1	3	12	151	5954
COAD	RASIP1	830, 958	0.00569188	9.85762	0.1	3	12	151	5954
LUAD	TP53	146, 159	0.00572901	2.62749	0.1	11	111	218	5780
UCEC	FBXW7	465, 465	0.00572907	3.59981	0.1	7	47	241	5825
LUAD	FAT1	4347, 4519	0.00576622	6.52778	0.1	4	16	225	5875
LUAD	MUC17	2368, 2498	0.00576622	6.52778	0.1	4	16	225	5875
LUAD	RPTN	368, 468	0.00576622	6.52778	0.1	4	16	225	5875
HNSC	MLL2	1835, 2014	0.00585816	5.06645	0.1	5	19	301	5795
STAD	CDH1	144, 222	0.00591005	6.4394	0.1	4	17	215	5884
STAD	CIC	1221, 1432	0.00591005	6.4394	0.1	4	17	215	5884
STAD	PCNXL2	1869, 2041	0.00591005	6.4394	0.1	4	17	215	5884
KICH	MUC5B	4460, 4575	0.00591721	20.9896	0.1	2	9	64	6045
STAD	EIF4A2	233, 316	0.00602718	10.2309	0.1	3	8	216	5893
STAD	PCDHA3	609, 657	0.00602718	10.2309	0.1	3	8	216	5893
STAD	ZHX2	179, 258	0.00602718	10.2309	0.1	3	8	216	5893
BLCA	AXIN1	610, 810	0.00605112	9.40945	0.1	3	15	127	5975
BLCA	EP300	207, 402	0.00605112	9.40945	0.1	3	15	127	5975
BLCA	ERBB2	305, 313	0.00605112	9.40945	0.1	3	15	127	5975
BLCA	SF3B1	847, 959	0.00605112	9.40945	0.1	3	15	127	5975
BLCA	TSC1	567, 882	0.00605112	9.40945	0.1	3	15	127	5975
BRCA	MAP3K1	1311, 1473	0.0061824	3.42301	0.1	9	14	964	5133
SKCM	CPS1	1213, 1321	0.00620214	6.54576	0.1	4	13	274	5829
SKCM	CYP11B1	75, 120	0.00620214	6.54576	0.1	4	13	274	5829
SKCM	FAT2	3978, 4167	0.00620214	6.54576	0.1	4	13	274	5829
SKCM	MLL	2765, 2946	0.00620214	6.54576	0.1	4	13	274	5829
SKCM	MLL2	4727, 4915	0.00620214	6.54576	0.1	4	13	274	5829
SKCM	MUC17	2268, 2342	0.00620214	6.54576	0.1	4	13	274	5829
SKCM	ZMIZ1	659, 860	0.00620214	6.54576	0.1	4	13	274	5829
UCS	ARID1A	2011, 2052	0.00622443	20.0066	0.1	2	11	55	6052
UCS	MKI67	2894, 3007	0.00622443	20.0066	0.1	2	11	55	6052
UCEC	CCDC105	334, 468	0.00630491	6.40109	0.1	4	15	244	5857
UCEC	CDH1	644, 733	0.00630491	6.40109	0.1	4	15	244	5857
UCEC	GFAP	180, 361	0.00630491	6.40109	0.1	4	15	244	5857
UCEC	GPR128	292, 419	0.00630491	6.40109	0.1	4	15	244	5857
UCEC	MAP3K1	670, 795	0.00630491	6.40109	0.1	4	15	244	5857
UCEC	MTOR	2407, 2532	0.00630491	6.40109	0.1	4	15	244	5857
UCEC	NF1	53, 216	0.00630491	6.40109	0.1	4	15	244	5857
UCEC	NF1	2380, 2492	0.00630491	6.40109	0.1	4	15	244	5857
UCEC	PTPRF	1721, 1861	0.00630491	6.40109	0.1	4	15	244	5857
UCEC	SETD2	432, 612	0.00630491	6.40109	0.1	4	15	244	5857
UCEC	SIN3A	1055, 1224	0.00630491	6.40109	0.1	4	15	244	5857
UCEC	UGP2	16, 101	0.00630491	6.40109	0.1	4	15	244	5857
UCEC	FAT1	1313, 1427	0.00638347	10.2595	0.1	3	7	245	5865
UCEC	TNRC18	1689, 1820	0.00638347	10.2595	0.1	3	7	245	5865
KIRP	ERCC3	32, 142	0.0064424	9.40981	0.1	3	12	158	5947
KIRP	ZFHX3	962, 1138	0.0064424	9.40981	0.1	3	12	158	5947
COAD	BRAF	600, 601	0.00655714	2.10434	0.1	19	374	135	5592
SKCM	TRIOBP	173, 373	0.00661071	4.84515	0.1	5	22	273	5820
SKCM	FLT3	814, 976	0.00673553	4.00506	0.1	6	32	272	5810
LUAD	GUSB	467, 602	0.00682699	9.76162	0.1	3	8	226	5883
LUAD	TGS1	607, 764	0.00682699	9.76162	0.1	3	8	226	5883
LUSC	CDKN2A	118, 129	0.00684329	9.29781	0.1	3	11	174	5932
LUSC	FAT1	1096, 1192	0.00684329	9.29781	0.1	3	11	174	5932
LUSC	KEAP1	231, 284	0.00684329	9.29781	0.1	3	11	174	5932
LUSC	MUC17	918, 956	0.00684329	9.29781	0.1	3	11	174	5932
LUSC	TGFBR2	277, 348	0.00684329	9.29781	0.1	3	11	174	5932
COAD	MED1	423, 533	0.0068775	9.09781	0.1	3	13	151	5953
COAD	MYH10	1557, 1670	0.0068775	9.09781	0.1	3	13	151	5953
HNSC	FAT1	2671, 2775	0.00691363	6.40397	0.1	4	12	302	5802
HNSC	FAT1	2825, 2943	0.00691363	6.40397	0.1	4	12	302	5802
HNSC	FAT1	3207, 3333	0.00691363	6.40397	0.1	4	12	302	5802
HNSC	MLL2	4964, 5106	0.00691363	6.40397	0.1	4	12	302	5802
LUAD	MUC17	1696, 1808	0.00691735	6.14275	0.1	4	17	225	5874
LUAD	PCDHGB1	296, 394	0.00691735	6.14275	0.1	4	17	225	5874
LUAD	SLC26A3	495, 613	0.00691735	6.14275	0.1	4	17	225	5874
READ	APC	211, 216	0.00693637	8.54972	0.1	3	32	66	6019
LGG	PIK3CA	5, 12	0.00694103	6.32781	0.1	4	13	283	5820
LGG	ZBTB20	190, 248	0.00694255	10.2588	0.1	3	6	284	5827
CESC	PLEC	3838, 4066	0.00699101	9.34263	0.1	3	10	190	5917
CESC	SPEN	1034, 1190	0.00699101	9.34263	0.1	3	10	190	5917
STAD	ARID1A	2104, 2198	0.00702418	6.08062	0.1	4	18	215	5883
KICH	MUC5B	4042, 4164	0.00705148	18.8875	0.1	2	10	64	6044
HNSC	ASXL1	480, 906	0.00706699	3.98966	0.1	6	29	300	5785
BLCA	ATM	2060, 2164	0.00707542	8.81988	0.1	3	16	127	5974
BLCA	HRAS	11, 13	0.00707542	8.81988	0.1	3	16	127	5974
BLCA	PBRM1	709, 798	0.00707542	8.81988	0.1	3	16	127	5974
BLCA	ZNF687	927, 1114	0.00707542	8.81988	0.1	3	16	127	5974
STAD	CTBP2	198, 273	0.00729231	27.1843	0.1	2	2	217	5899
ACC	AHNAK2	3858, 3915	0.00733092	18.3242	0.1	2	11	60	6047
ACC	IRX4	176, 230	0.00733092	18.3242	0.1	2	11	60	6047
KIRC	SETD2	432, 612	0.00750283	4.93152	0.1	5	14	412	5689
UCEC	CYP11B1	260, 422	0.0075146	4.62646	0.1	5	26	243	5846
UCEC	CHEK2	77, 210	0.00763455	6	0.1	4	16	244	5856
UCEC	DNER	151, 259	0.00763455	6	0.1	4	16	244	5856
UCEC	JAKMIP2	250, 334	0.00763455	6	0.1	4	16	244	5856
UCEC	MAP3K7	186, 349	0.00763455	6	0.1	4	16	244	5856
UCEC	SLC26A8	18, 178	0.00763455	6	0.1	4	16	244	5856
UCEC	SMC3	21, 230	0.00763455	6	0.1	4	16	244	5856
UCEC	ZMYM2	1158, 1348	0.00763455	6	0.1	4	16	244	5856
UCEC	ZNF471	479, 600	0.00763455	6	0.1	4	16	244	5856
BRCA	CDH1	224, 261	0.00767082	4.13688	0.1	7	9	966	5138
SKCM	ALPK2	1833, 1971	0.00769393	6.07716	0.1	4	14	274	5828
SKCM	CD209	233, 357	0.00769393	6.07716	0.1	4	14	274	5828
SKCM	CHD8	599, 796	0.00769393	6.07716	0.1	4	14	274	5828
SKCM	EMR1	483, 579	0.00769393	6.07716	0.1	4	14	274	5828
SKCM	KDR	328, 400	0.00769393	6.07716	0.1	4	14	274	5828
SKCM	KLHL1	541, 611	0.00769393	6.07716	0.1	4	14	274	5828
SKCM	MCTP1	794, 947	0.00769393	6.07716	0.1	4	14	274	5828
SKCM	NCOR1	93, 220	0.00769393	6.07716	0.1	4	14	274	5828
SKCM	NF1	304, 400	0.00769393	6.07716	0.1	4	14	274	5828
SKCM	SEMA5B	604, 707	0.00769393	6.07716	0.1	4	14	274	5828
SKCM	SLC26A8	656, 740	0.00769393	6.07716	0.1	4	14	274	5828
SKCM	SYT15	63, 136	0.00769393	6.07716	0.1	4	14	274	5828
SKCM	TDG	167, 339	0.00769393	6.07716	0.1	4	14	274	5828
SKCM	TMEM175	128, 260	0.00769393	6.07716	0.1	4	14	274	5828
SKCM	DNMT1	1231, 1507	0.00775544	4.6337	0.1	5	23	273	5819
SKCM	SEZ6L2	65, 258	0.00775544	4.6337	0.1	5	23	273	5819
STAD	AHNAK2	2548, 2638	0.00782635	9.09259	0.1	3	9	216	5892
STAD	DIAPH3	629, 735	0.00782635	9.09259	0.1	3	9	216	5892
STAD	FAT2	3785, 3934	0.00782635	9.09259	0.1	3	9	216	5892
STAD	MARK3	386, 544	0.00782635	9.09259	0.1	3	9	216	5892
STAD	MUC5B	4805, 4865	0.00782635	9.09259	0.1	3	9	216	5892
STAD	MUC6	2196, 2290	0.00782635	9.09259	0.1	3	9	216	5892
STAD	PLCG1	516, 652	0.00782635	9.09259	0.1	3	9	216	5892
STAD	SPAG9	271, 477	0.00782635	9.09259	0.1	3	9	216	5892
STAD	TCF7L2	382, 509	0.00782635	9.09259	0.1	3	9	216	5892
UCS	PTEN	116, 146	0.00785758	4.42308	0.1	5	129	52	5934
COAD	BTBD11	769, 980	0.00801164	5.65524	0.1	4	28	150	5938
COAD	PIK3CA	81, 93	0.00804738	4.41536	0.1	5	45	149	5921
BLCA	NF1	923, 1083	0.00819639	8.29968	0.1	3	17	127	5973
BLCA	UGP2	169, 369	0.00819639	8.29968	0.1	3	17	127	5973
COAD	IBTK	423, 575	0.00819897	8.44655	0.1	3	14	151	5952
COAD	PPIG	510, 614	0.00819897	8.44655	0.1	3	14	151	5952
COAD	SMARCA4	325, 446	0.00819897	8.44655	0.1	3	14	151	5952
COAD	VAV3	598, 741	0.00819897	8.44655	0.1	3	14	151	5952
COAD	ZHX2	674, 790	0.00819897	8.44655	0.1	3	14	151	5952
BRCA	TP53	103, 115	0.00824198	2.42646	0.1	15	33	958	5114
STAD	RBBP6	1433, 1598	0.00826874	5.75961	0.1	4	19	215	5882
STAD	PIK3CA	81, 93	0.00835858	3.74968	0.1	6	44	213	5857
BRCA	ACTL6B	156, 323	0.00836112	3.5475	0.1	8	12	965	5135
LUSC	ASXL2	1010, 1239	0.00837436	8.52155	0.1	3	12	174	5931
LUSC	EP300	1389, 1409	0.00837436	8.52155	0.1	3	12	174	5931
LUSC	FGFR3	248, 254	0.00837436	8.52155	0.1	3	12	174	5931
LUSC	OTOF	1060, 1169	0.00837436	8.52155	0.1	3	12	174	5931
LUSC	PDILT	469, 546	0.00837436	8.52155	0.1	3	12	174	5931
LUSC	TRIM9	612, 704	0.00837436	8.52155	0.1	3	12	174	5931
LUSC	UNC5D	653, 704	0.00837436	8.52155	0.1	3	12	174	5931
LUSC	ZFP36L1	154, 245	0.00837436	8.52155	0.1	3	12	174	5931
LUAD	TP53	103, 115	0.00846433	3.74696	0.1	6	42	223	5849
ACC	HLA-B	98, 159	0.00849726	16.7944	0.1	2	12	60	6046
ACC	MLL4	1251, 1463	0.00849726	16.7944	0.1	2	12	60	6046
ACC	TGFBR2	277, 348	0.00849726	16.7944	0.1	2	12	60	6046
UCEC	AHNAK2	3761, 3837	0.00851726	8.97551	0.1	3	8	245	5864
UCEC	ATXN1	619, 713	0.00851726	8.97551	0.1	3	8	245	5864
UCEC	NFAT5	111, 263	0.00851726	8.97551	0.1	3	8	245	5864
UCEC	NSD1	425, 565	0.00851726	8.97551	0.1	3	8	245	5864
UCEC	PCDHA3	609, 657	0.00851726	8.97551	0.1	3	8	245	5864
UCEC	PCDHGA7	585, 646	0.00851726	8.97551	0.1	3	8	245	5864
CESC	EP300	708, 840	0.00869348	8.49187	0.1	3	11	190	5916
BLCA	AHNAK2	4092, 4188	0.00876842	18.7031	0.1	2	5	128	5985
SKCM	OBSCN	5931, 6011	0.00877024	9.09351	0.1	3	7	275	5835
LUAD	DSPP	419, 522	0.00885408	8.67552	0.1	3	9	226	5882
LUAD	HHIPL1	94, 242	0.00885408	8.67552	0.1	3	9	226	5882
READ	CPS1	604, 656	0.00901895	16.3908	0.1	2	11	67	6040
READ	ZNF385B	115, 205	0.00901895	16.3908	0.1	2	11	67	6040
SKCM	JAKMIP2	34, 163	0.00903111	4.43987	0.1	5	24	273	5818
SKCM	RNF31	378, 658	0.00903111	4.43987	0.1	5	24	273	5818
UCEC	DNER	663, 730	0.00913627	5.64609	0.1	4	17	244	5855
UCEC	TRERF1	780, 939	0.00913627	5.64609	0.1	4	17	244	5855
HNSC	TP53	103, 115	0.00917875	3.29644	0.1	7	41	299	5773
HNSC	TP53	130, 138	0.0091887	2.76623	0.1	9	63	297	5751
KIRC	DMKN	141, 282	0.00926829	6.12752	0.1	4	9	413	5694
HNSC	NFE2L2	77, 82	0.00930983	3.73097	0.1	6	31	300	5783
LIHC	ALB	517, 594	0.00932693	8.26713	0.1	3	11	195	5911
LIHC	KEAP1	231, 284	0.00932693	8.26713	0.1	3	11	195	5911
LIHC	SLC1A3	354, 479	0.00932693	8.26713	0.1	3	11	195	5911
READ	SMAD4	351, 363	0.00938022	7.5947	0.1	3	36	66	6015
HNSC	TP53	146, 159	0.00940349	2.32223	0.1	13	109	293	5705
SKCM	CASZ1	1250, 1419	0.0094037	5.67105	0.1	4	15	274	5827
SKCM	CDC42EP1	68, 260	0.0094037	5.67105	0.1	4	15	274	5827
SKCM	FRMPD2	733, 795	0.0094037	5.67105	0.1	4	15	274	5827
SKCM	GFAP	180, 361	0.0094037	5.67105	0.1	4	15	274	5827
SKCM	KLHL1	221, 292	0.0094037	5.67105	0.1	4	15	274	5827
SKCM	MUC17	2558, 2669	0.0094037	5.67105	0.1	4	15	274	5827
UCS	ARHGAP35	965, 1039	0.00940621	15.7117	0.1	2	14	55	6049
UCS	MUC17	2814, 2885	0.00940621	15.7117	0.1	2	14	55	6049
KICH	NOTCH2	114, 238	0.00958844	15.7344	0.1	2	12	64	6042
STAD	SPEN	561, 726	0.00964952	5.4707	0.1	4	20	215	5881
COAD	ACVR1B	216, 305	0.00965959	7.88212	0.1	3	15	151	5951
COAD	CDC27	28, 130	0.00965959	7.88212	0.1	3	15	151	5951
COAD	DHX57	564, 806	0.00965959	7.88212	0.1	3	15	151	5951
COAD	FCN1	218, 293	0.00965959	7.88212	0.1	3	15	151	5951
COAD	POLE	390, 436	0.00965959	7.88212	0.1	3	15	151	5951
COAD	ZNF721	730, 854	0.00965959	7.88212	0.1	3	15	151	5951
ACC	KNDC1	346, 492	0.00974097	15.5	0.1	2	13	60	6045
STAD	SBNO1	1084, 1244	0.009909	8.18194	0.1	3	10	216	5891
STAD	SLITRK5	272, 338	0.009909	8.18194	0.1	3	10	216	5891
STAD	WHSC1L1	1062, 1222	0.009909	8.18194	0.1	3	10	216	5891
UCEC	ROBO3	195, 509	0.00982961	4.29453	0.25	5	28	243	5844
STAD	AHNAK2	3858, 3915	0.009909	8.18194	0.25	3	10	216	5891
STAD	CR1	1169, 1292	0.009909	8.18194	0.25	3	10	216	5891
STAD	CTNND1	403, 472	0.009909	8.18194	0.25	3	10	216	5891
STAD	DLC1	1262, 1333	0.009909	8.18194	0.25	3	10	216	5891
STAD	FADS2	182, 291	0.009909	8.18194	0.25	3	10	216	5891
STAD	FAT1	3597, 3707	0.009909	8.18194	0.25	3	10	216	5891
STAD	GABBR1	623, 783	0.009909	8.18194	0.25	3	10	216	5891
STAD	MLL3	4565, 4714	0.009909	8.18194	0.25	3	10	216	5891
STAD	PCDHGA7	682, 745	0.009909	8.18194	0.25	3	10	216	5891
LUSC	AHNAK2	2407, 2535	0.0100906	7.86472	0.25	3	13	174	5930
LUSC	MLL2	4964, 5106	0.0100906	7.86472	0.25	3	13	174	5930
LUSC	MUC5B	4924, 5049	0.0100906	7.86472	0.25	3	13	174	5930
LUSC	NOTCH2	386, 507	0.0100906	7.86472	0.25	3	13	174	5930
LUSC	PCDHA2	456, 522	0.0100906	7.86472	0.25	3	13	174	5930
LUSC	PTEN	245, 252	0.0100906	7.86472	0.25	3	13	174	5930
LUSC	SALL1	244, 322	0.0100906	7.86472	0.25	3	13	174	5930
LUSC	TPO	834, 906	0.0100906	7.86472	0.25	3	13	174	5930
UCS	TP53	192, 201	0.0102583	4.12834	0.25	5	138	52	5925
CESC	NSD1	1594, 1757	0.0106179	7.78289	0.25	3	12	190	5915
CESC	SPEN	376, 491	0.0106179	7.78289	0.25	3	12	190	5915
BLCA	RAB3GAP1	681, 898	0.0107359	7.42354	0.25	3	19	127	5971
UCEC	EP300	479, 648	0.0108182	5.33151	0.25	4	18	244	5854
KIRP	MUC5B	682, 682	0.0109056	7.52405	0.25	3	15	158	5944
UCEC	AHCY	196, 352	0.0110206	7.97687	0.25	3	9	245	5863
UCEC	CCDC150	54, 189	0.0110206	7.97687	0.25	3	9	245	5863
UCEC	MED23	314, 479	0.0110206	7.97687	0.25	3	9	245	5863
UCEC	MKI67	1948, 2069	0.0110206	7.97687	0.25	3	9	245	5863
UCEC	MLL3	3788, 3930	0.0110206	7.97687	0.25	3	9	245	5863
UCEC	MUC5B	1208, 1364	0.0110206	7.97687	0.25	3	9	245	5863
UCEC	MUC5B	4355, 4388	0.0110206	7.97687	0.25	3	9	245	5863
UCEC	OBSCN	2573, 2735	0.0110206	7.97687	0.25	3	9	245	5863
UCEC	OTOF	408, 502	0.0110206	7.97687	0.25	3	9	245	5863
UCEC	PCDHA2	22, 82	0.0110206	7.97687	0.25	3	9	245	5863
UCEC	PCNXL2	1244, 1351	0.0110206	7.97687	0.25	3	9	245	5863
UCEC	POM121	906, 985	0.0110206	7.97687	0.25	3	9	245	5863
UCEC	TCF7L2	382, 509	0.0110206	7.97687	0.25	3	9	245	5863
UCEC	VEPH1	185, 266	0.0110206	7.97687	0.25	3	9	245	5863
UCEC	WHSC1L1	764, 910	0.0110206	7.97687	0.25	3	9	245	5863
UCEC	ZFHX3	3498, 3668	0.0110206	7.97687	0.25	3	9	245	5863
ACC	HRNR	1894, 1936	0.0110604	14.3905	0.25	2	14	60	6044
ACC	SPIRE2	287, 449	0.0110604	14.3905	0.25	2	14	60	6044
ACC	STK11	168, 221	0.0110604	14.3905	0.25	2	14	60	6044
STAD	TAOK2	113, 326	0.0111719	5.2093	0.25	4	21	215	5880
LUAD	AHNAK2	2851, 2951	0.0111966	7.80664	0.25	3	10	226	5881
LUAD	HIBCH	85, 232	0.0111966	7.80664	0.25	3	10	226	5881
LUAD	HRNR	2126, 2144	0.0111966	7.80664	0.25	3	10	226	5881
LUAD	KIAA1211	1101, 1195	0.0111966	7.80664	0.25	3	10	226	5881
LUAD	MUC17	451, 535	0.0111966	7.80664	0.25	3	10	226	5881
LUAD	MYH9	92, 234	0.0111966	7.80664	0.25	3	10	226	5881
LUAD	PCDHA3	61, 103	0.0111966	7.80664	0.25	3	10	226	5881
LUAD	ZBTB7B	222, 319	0.0111966	7.80664	0.25	3	10	226	5881
COAD	ATM	2060, 2164	0.0112621	7.38825	0.25	3	16	151	5950
COAD	FN1	18, 206	0.0112621	7.38825	0.25	3	16	151	5950
COAD	IRS1	651, 776	0.0112621	7.38825	0.25	3	16	151	5950
COAD	KLHL5	260, 404	0.0112621	7.38825	0.25	3	16	151	5950
COAD	MLLT10	416, 515	0.0112621	7.38825	0.25	3	16	151	5950
BRCA	MED23	520, 724	0.0112812	3.72246	0.25	7	10	966	5137
SKCM	ALPK2	1632, 1797	0.0113429	5.31569	0.25	4	16	274	5826
SKCM	ATXN1	139, 248	0.0113429	5.31569	0.25	4	16	274	5826
SKCM	DNER	151, 259	0.0113429	5.31569	0.25	4	16	274	5826
SKCM	FGFR3	546, 762	0.0113429	5.31569	0.25	4	16	274	5826
SKCM	RASGRF2	868, 978	0.0113429	5.31569	0.25	4	16	274	5826
SKCM	RPTN	368, 468	0.0113429	5.31569	0.25	4	16	274	5826
SKCM	SETD2	1207, 1368	0.0113429	5.31569	0.25	4	16	274	5826
SKCM	UNC5D	832, 922	0.0113429	5.31569	0.25	4	16	274	5826
HNSC	PLEC	3439, 3549	0.011424	8.21358	0.25	3	7	303	5807
HNSC	PLEC	4499, 4624	0.011424	8.21358	0.25	3	7	303	5807
UCS	FBXW7	502, 526	0.0116295	6.96181	0.25	3	48	54	6015
UCS	LZTR1	243, 324	0.0118509	13.7432	0.25	2	16	55	6047
UCS	PPP2R1A	237, 275	0.0118509	13.7432	0.25	2	16	55	6047
LUSC	CREBBP	1417, 1471	0.0119961	7.30172	0.25	3	14	174	5929
LUSC	KIF19	747, 961	0.0119961	7.30172	0.25	3	14	174	5929
LUSC	MTOR	602, 773	0.0119961	7.30172	0.25	3	14	174	5929
LUSC	PDZD7	101, 272	0.0119961	7.30172	0.25	3	14	174	5929
LUSC	RB1	53, 97	0.0119961	7.30172	0.25	3	14	174	5929
LUSC	RPTN	112, 244	0.0119961	7.30172	0.25	3	14	174	5929
LUSC	SLC28A1	387, 542	0.0119961	7.30172	0.25	3	14	174	5929
LUSC	ST6GALNAC5	145, 220	0.0119961	7.30172	0.25	3	14	174	5929
LUSC	VEPH1	358, 507	0.0119961	7.30172	0.25	3	14	174	5929
OV	TP53	256, 260	0.0119989	5.3022	0.25	4	14	312	5790
SKCM	SF3B1	576, 781	0.0120024	4.09693	0.25	5	26	273	5816
BLCA	MLL2	2311, 2483	0.0121575	7.05118	0.25	3	20	127	5970
READ	TP53	121, 127	0.0122682	6.83068	0.25	3	40	66	6011
STAD	ABTB1	136, 279	0.0122833	7.43687	0.25	3	11	216	5890
STAD	AHNAK2	1868, 1978	0.0122833	7.43687	0.25	3	11	216	5890
STAD	ARID1A	1118, 1172	0.0122833	7.43687	0.25	3	11	216	5890
STAD	CHD4	569, 659	0.0122833	7.43687	0.25	3	11	216	5890
STAD	MUC17	1319, 1376	0.0122833	7.43687	0.25	3	11	216	5890
STAD	RAB3GAP1	41, 149	0.0122833	7.43687	0.25	3	11	216	5890
STAD	SPEN	2562, 2624	0.0122833	7.43687	0.25	3	11	216	5890
ACC	MUC6	1835, 1927	0.012454	13.4289	0.25	2	15	60	6043
ACC	NOM1	139, 295	0.012454	13.4289	0.25	2	15	60	6043
ACC	UNC5A	649, 815	0.012454	13.4289	0.25	2	15	60	6043
KICH	NPTX1	162, 263	0.01247	13.4821	0.25	2	14	64	6040
READ	TP53	280, 289	0.0125961	3.89443	0.25	5	119	64	5932
BLCA	DLC1	617, 866	0.0126495	4.84412	0.25	4	39	126	5951
PRAD	CASZ1	669, 723	0.0126684	7.55814	0.25	3	9	258	5850
UCEC	RBBP6	1433, 1598	0.0126877	5.05004	0.25	4	19	244	5853
CESC	MUC5B	3812, 3955	0.0127693	7.183	0.25	3	13	190	5914
CESC	PIK3CA	725, 726	0.0127693	7.183	0.25	3	13	190	5914
STAD	SGK223	34, 272	0.0128408	4.97167	0.25	4	22	215	5879
COAD	ALPK2	1632, 1797	0.0130089	6.95247	0.25	3	17	151	5949
COAD	GIGYF2	54, 140	0.0130089	6.95247	0.25	3	17	151	5949
COAD	JAKMIP2	250, 334	0.0130089	6.95247	0.25	3	17	151	5949
COAD	JAKMIP2	476, 558	0.0130089	6.95247	0.25	3	17	151	5949
COAD	MSH6	912, 993	0.0130089	6.95247	0.25	3	17	151	5949
COAD	PCNXL2	1672, 1799	0.0130089	6.95247	0.25	3	17	151	5949
COAD	RASGRF2	868, 978	0.0130089	6.95247	0.25	3	17	151	5949
COAD	SMAD4	65, 144	0.0130089	6.95247	0.25	3	17	151	5949
COAD	TIGD4	270, 349	0.0130089	6.95247	0.25	3	17	151	5949
COAD	UGP2	169, 369	0.0130089	6.95247	0.25	3	17	151	5949
COAD	ZFHX3	30, 177	0.0130089	6.95247	0.25	3	17	151	5949
HNSC	KLHL1	330, 403	0.013082	5.12053	0.25	4	15	302	5799
UCS	CHD4	1287, 1376	0.0131666	12.9326	0.25	2	17	55	6046
SKCM	MUC17	1696, 1808	0.0135218	5.00215	0.25	4	17	274	5825
SKCM	RBBP6	974, 1161	0.0135218	5.00215	0.25	4	17	274	5825
SKCM	TPO	148, 206	0.0135218	5.00215	0.25	4	17	274	5825
SKCM	TRERF1	780, 939	0.0135218	5.00215	0.25	4	17	274	5825
READ	TCF12	559, 676	0.0135765	12.8721	0.25	2	14	67	6037
BLCA	RPTN	489, 591	0.0136822	6.71429	0.25	3	21	127	5969
LUAD	ARAP3	86, 197	0.0138626	7.09574	0.25	3	11	226	5880
LUAD	ASXL2	582, 742	0.0138626	7.09574	0.25	3	11	226	5880
LUAD	FAT1	1096, 1192	0.0138626	7.09574	0.25	3	11	226	5880
LUAD	FAT1	3818, 3954	0.0138626	7.09574	0.25	3	11	226	5880
LUAD	L1TD1	340, 471	0.0138626	7.09574	0.25	3	11	226	5880
LUAD	SLC1A3	354, 479	0.0138626	7.09574	0.25	3	11	226	5880
LUAD	SMARCA4	1083, 1162	0.0138626	7.09574	0.25	3	11	226	5880
LUAD	TNRC18	2155, 2355	0.0138626	7.09574	0.25	3	11	226	5880
UCEC	B4GALT2	173, 336	0.0139042	7.17796	0.25	3	10	245	5862
UCEC	CR1	1169, 1292	0.0139042	7.17796	0.25	3	10	245	5862
UCEC	CTNND1	403, 472	0.0139042	7.17796	0.25	3	10	245	5862
UCEC	FAM65B	506, 559	0.0139042	7.17796	0.25	3	10	245	5862
UCEC	MLL3	1881, 1977	0.0139042	7.17796	0.25	3	10	245	5862
UCEC	MLL3	3022, 3177	0.0139042	7.17796	0.25	3	10	245	5862
UCEC	MLL3	4565, 4714	0.0139042	7.17796	0.25	3	10	245	5862
UCEC	OBSCN	2262, 2344	0.0139042	7.17796	0.25	3	10	245	5862
UCEC	PANK2	392, 542	0.0139042	7.17796	0.25	3	10	245	5862
UCEC	PCDHA3	469, 497	0.0139042	7.17796	0.25	3	10	245	5862
UCEC	PCDHGB1	698, 763	0.0139042	7.17796	0.25	3	10	245	5862
UCEC	RNF31	812, 924	0.0139042	7.17796	0.25	3	10	245	5862
UCEC	SORBS2	467, 609	0.0139042	7.17796	0.25	3	10	245	5862
UCEC	TRIM9	410, 475	0.0139042	7.17796	0.25	3	10	245	5862
UCEC	WHSC1L1	1062, 1222	0.0139042	7.17796	0.25	3	10	245	5862
UCEC	ZBTB7B	3, 99	0.0139042	7.17796	0.25	3	10	245	5862
UCEC	ZNF687	287, 462	0.0139042	7.17796	0.25	3	10	245	5862
KICH	MUC17	1394, 1466	0.0140352	12.5813	0.25	2	15	64	6039
LUSC	ARID1A	992, 1049	0.0140942	6.81379	0.25	3	15	174	5928
LUSC	EMR1	483, 579	0.0140942	6.81379	0.25	3	15	174	5928
LUSC	FOXP2	497, 591	0.0140942	6.81379	0.25	3	15	174	5928
LUSC	MAP1S	46, 253	0.0140942	6.81379	0.25	3	15	174	5928
KIRC	SETD2	1690, 1876	0.0143531	4.05911	0.25	5	17	412	5686
LUSC	CDKN2A	42, 58	0.0143793	4.71517	0.25	4	29	173	5914
STAD	CR1	1719, 1839	0.0146609	4.7547	0.25	4	23	215	5878
STAD	CREBBP	1614, 1767	0.0146609	4.7547	0.25	4	23	215	5878
KIRP	FGFR3	546, 762	0.0146623	6.63663	0.25	3	17	158	5942
UCEC	CIC	174, 253	0.0147517	4.79672	0.25	4	20	244	5852
UCEC	SPEN	561, 726	0.0147517	4.79672	0.25	4	20	244	5852
UCEC	SPOP	131, 140	0.0147517	4.79672	0.25	4	20	244	5852
COAD	ING1	339, 378	0.0149016	6.56512	0.25	3	18	151	5948
LUAD	BTBD11	624, 741	0.0149336	4.74263	0.25	4	22	225	5869
STAD	AARS2	630, 781	0.0149553	6.81597	0.25	3	12	216	5889
STAD	APC	2166, 2253	0.0149553	6.81597	0.25	3	12	216	5889
STAD	CHD8	284, 531	0.0149553	6.81597	0.25	3	12	216	5889
STAD	ELF3	324, 366	0.0149553	6.81597	0.25	3	12	216	5889
STAD	FAT1	3982, 4147	0.0149553	6.81597	0.25	3	12	216	5889
STAD	FRMPD2	465, 558	0.0149553	6.81597	0.25	3	12	216	5889
STAD	HRNR	557, 625	0.0149553	6.81597	0.25	3	12	216	5889
STAD	ITGAL	460, 570	0.0149553	6.81597	0.25	3	12	216	5889
STAD	KIF20B	442, 544	0.0149553	6.81597	0.25	3	12	216	5889
STAD	KLHL8	262, 402	0.0149553	6.81597	0.25	3	12	216	5889
STAD	MLL2	5125, 5214	0.0149553	6.81597	0.25	3	12	216	5889
STAD	MLL3	56, 144	0.0149553	6.81597	0.25	3	12	216	5889
STAD	MLL3	3579, 3724	0.0149553	6.81597	0.25	3	12	216	5889
STAD	MSH4	170, 261	0.0149553	6.81597	0.25	3	12	216	5889
STAD	OBSCN	6068, 6230	0.0149553	6.81597	0.25	3	12	216	5889
STAD	SEMA5B	986, 1124	0.0149553	6.81597	0.25	3	12	216	5889
STAD	SEMG1	316, 417	0.0149553	6.81597	0.25	3	12	216	5889
STAD	SPAG9	568, 918	0.0149553	6.81597	0.25	3	12	216	5889
STAD	TPP2	596, 717	0.0149553	6.81597	0.25	3	12	216	5889
STAD	ZNF334	318, 391	0.0149553	6.81597	0.25	3	12	216	5889
SKCM	AHNAK2	2548, 2638	0.0150305	7.0703	0.25	3	9	275	5833
SKCM	APP	246, 359	0.0150305	7.0703	0.25	3	9	275	5833
SKCM	CCKAR	313, 360	0.0150305	7.0703	0.25	3	9	275	5833
SKCM	OBSCN	2395, 2556	0.0150305	7.0703	0.25	3	9	275	5833
SKCM	SALL1	422, 483	0.0150305	7.0703	0.25	3	9	275	5833
SKCM	ZNF750	250, 351	0.0150305	7.0703	0.25	3	9	275	5833
HNSC	MUC5B	4460, 4575	0.0151346	7.18564	0.25	3	8	303	5806
BRCA	ASXL2	582, 742	0.0151446	3.98578	0.25	6	8	967	5139
CESC	FAT2	1331, 1445	0.0151515	6.6688	0.25	3	14	190	5913
CESC	RASIP1	601, 794	0.0151515	6.6688	0.25	3	14	190	5913
OV	APOB	1030, 1689	0.0151809	3.87192	0.25	5	24	311	5780
READ	AVL9	94, 291	0.0152757	12.0119	0.25	2	15	67	6036
READ	IRX3	158, 273	0.0152757	12.0119	0.25	2	15	67	6036
READ	RAE1	186, 280	0.0152757	12.0119	0.25	2	15	67	6036
READ	VEPH1	358, 507	0.0152757	12.0119	0.25	2	15	67	6036
GBM	PIK3R1	45, 102	0.0152859	2.93543	0.25	7	50	276	5787
ACC	PER3	643, 884	0.0154572	11.8451	0.25	2	17	60	6041
CESC	SNED1	516, 1132	0.0154927	4.62473	0.25	4	27	189	5900
GBM	RB1	770, 802	0.0157707	6.9381	0.25	3	9	280	5828
UCEC	RREB1	120, 611	0.0158388	3.75514	0.25	5	32	243	5840
LGG	TP53	218, 222	0.0158676	3.25623	0.25	6	38	281	5795
KIRC	MTOR	1966, 2033	0.0158748	5.01167	0.25	4	11	413	5692
SKCM	DNMT1	696, 1037	0.0159496	4.72344	0.25	4	18	274	5824
SKCM	PTCH1	590, 759	0.0159496	4.72344	0.25	4	18	274	5824
SKCM	RAB3GAP1	681, 898	0.0159496	4.72344	0.25	4	18	274	5824
UCEC	FBXW7	502, 526	0.016288	3.21047	0.25	6	45	242	5827
LUSC	CCDC105	334, 468	0.0163872	6.38685	0.25	3	16	174	5927
LUSC	FN1	18, 206	0.0163872	6.38685	0.25	3	16	174	5927
LUSC	GPR128	292, 419	0.0163872	6.38685	0.25	3	16	174	5927
LUSC	HRAS	11, 13	0.0163872	6.38685	0.25	3	16	174	5927
LUSC	KLHL1	330, 403	0.0163872	6.38685	0.25	3	16	174	5927
LUSC	SALL1	1050, 1194	0.0163872	6.38685	0.25	3	16	174	5927
OV	NOTCH1	2327, 2487	0.0165068	6.94409	0.25	3	8	313	5796
KIRC	BAP1	163, 324	0.0165341	3.31562	0.25	6	25	411	5678
LUAD	ATXN1	322, 379	0.0168577	6.50332	0.25	3	12	226	5879
LUAD	GRB7	160, 290	0.0168577	6.50332	0.25	3	12	226	5879
LUAD	MGA	1203, 1348	0.0168577	6.50332	0.25	3	12	226	5879
LUAD	PCDHGA9	608, 729	0.0168577	6.50332	0.25	3	12	226	5879
LUAD	SEMA5B	218, 328	0.0168577	6.50332	0.25	3	12	226	5879
LUAD	TSC1	129, 222	0.0168577	6.50332	0.25	3	12	226	5879
COAD	EP300	479, 648	0.0169418	6.21854	0.25	3	19	151	5947
COAD	PCDHA2	668, 763	0.0169418	6.21854	0.25	3	19	151	5947
HNSC	CTCF	482, 651	0.0170583	3.21	0.25	6	36	300	5778
READ	APOB	2837, 3297	0.0170612	11.2593	0.25	2	16	67	6035
READ	MYH10	945, 1095	0.0170612	11.2593	0.25	2	16	67	6035
READ	SEMA5B	604, 707	0.0170612	11.2593	0.25	2	16	67	6035
ACC	CHEK2	77, 210	0.0170638	11.1852	0.25	2	18	60	6040
UCEC	AQP12A	7, 70	0.0171753	6.5243	0.25	3	11	245	5861
UCEC	ARAP3	86, 197	0.0171753	6.5243	0.25	3	11	245	5861
UCEC	CABYR	51, 227	0.0171753	6.5243	0.25	3	11	245	5861
UCEC	CCDC82	6, 75	0.0171753	6.5243	0.25	3	11	245	5861
UCEC	ERCC3	278, 410	0.0171753	6.5243	0.25	3	11	245	5861
UCEC	FAT1	1915, 2049	0.0171753	6.5243	0.25	3	11	245	5861
UCEC	FAT2	557, 600	0.0171753	6.5243	0.25	3	11	245	5861
UCEC	FGFR3	349, 456	0.0171753	6.5243	0.25	3	11	245	5861
UCEC	IRS1	195, 263	0.0171753	6.5243	0.25	3	11	245	5861
UCEC	MAP7	73, 162	0.0171753	6.5243	0.25	3	11	245	5861
UCEC	MLL2	5381, 5466	0.0171753	6.5243	0.25	3	11	245	5861
UCEC	PDILT	316, 365	0.0171753	6.5243	0.25	3	11	245	5861
UCEC	PTCH1	197, 294	0.0171753	6.5243	0.25	3	11	245	5861
UCEC	RAD21	506, 596	0.0171753	6.5243	0.25	3	11	245	5861
UCEC	RB1	695, 761	0.0171753	6.5243	0.25	3	11	245	5861
UCEC	SETD2	815, 944	0.0171753	6.5243	0.25	3	11	245	5861
UCEC	SMARCA4	1083, 1162	0.0171753	6.5243	0.25	3	11	245	5861
UCEC	TBL1XR1	302, 394	0.0171753	6.5243	0.25	3	11	245	5861
KIRP	AHNAK2	1191, 1250	0.0173528	12.4801	0.25	2	6	159	5953
STAD	AHNAK2	3123, 3175	0.0173849	13.5876	0.25	2	4	217	5897
KICH	PER3	643, 884	0.0174048	11.0974	0.25	2	17	64	6037
SKCM	PTEN	162, 178	0.0176026	3.67121	0.25	5	29	273	5813
HNSC	TP53	231, 240	0.0176979	2.45113	0.25	9	71	297	5743
LGG	NF1	1192, 1276	0.0177466	4.56616	0.25	4	18	283	5815
CESC	EP300	207, 402	0.0177672	6.22316	0.25	3	15	190	5912
CESC	FAT2	331, 459	0.0177672	6.22316	0.25	3	15	190	5912
CESC	FBXW7	479, 481	0.0177672	6.22316	0.25	3	15	190	5912
STAD	ARID1A	2232, 2275	0.0179292	6.2906	0.25	3	13	216	5888
STAD	CAB39L	60, 214	0.0179292	6.2906	0.25	3	13	216	5888
STAD	CASZ1	503, 612	0.0179292	6.2906	0.25	3	13	216	5888
STAD	CDH1	224, 261	0.0179292	6.2906	0.25	3	13	216	5888
STAD	EZH2	662, 740	0.0179292	6.2906	0.25	3	13	216	5888
STAD	GUSB	330, 430	0.0179292	6.2906	0.25	3	13	216	5888
STAD	MLL2	2914, 3103	0.0179292	6.2906	0.25	3	13	216	5888
STAD	MLL2	4399, 4583	0.0179292	6.2906	0.25	3	13	216	5888
STAD	MYH10	1557, 1670	0.0179292	6.2906	0.25	3	13	216	5888
STAD	NCOR1	1435, 1582	0.0179292	6.2906	0.25	3	13	216	5888
STAD	NFAT5	1164, 1381	0.0179292	6.2906	0.25	3	13	216	5888
STAD	NOTCH2	1841, 1983	0.0179292	6.2906	0.25	3	13	216	5888
STAD	SALL1	28, 85	0.0179292	6.2906	0.25	3	13	216	5888
STAD	SALL1	244, 322	0.0179292	6.2906	0.25	3	13	216	5888
STAD	TEX2	10, 142	0.0179292	6.2906	0.25	3	13	216	5888
STAD	UNC5A	364, 529	0.0179292	6.2906	0.25	3	13	216	5888
STAD	ZMIZ1	280, 447	0.0179292	6.2906	0.25	3	13	216	5888
STAD	ZNF644	367, 524	0.0179292	6.2906	0.25	3	13	216	5888
LUSC	TP53	203, 216	0.0183594	2.3061	0.25	11	166	166	5777
SKCM	MLL2	2311, 2483	0.0186345	4.47407	0.25	4	19	274	5823
HNSC	FAT1	2971, 3136	0.0186761	4.51656	0.25	4	17	302	5797
STAD	RNF31	378, 658	0.0187705	4.37284	0.25	4	25	215	5876
LUSC	ALPK2	1632, 1797	0.0188768	6.01014	0.25	3	17	174	5926
LUSC	FN1	232, 384	0.0188768	6.01014	0.25	3	17	174	5926
LUSC	KEAP1	137, 189	0.0188768	6.01014	0.25	3	17	174	5926
LUSC	RASGRF2	138, 289	0.0188768	6.01014	0.25	3	17	174	5926
LUSC	TRIOBP	1192, 1428	0.0188768	6.01014	0.25	3	17	174	5926
LUSC	UGP2	169, 369	0.0188768	6.01014	0.25	3	17	174	5926
LUSC	UNC5D	832, 922	0.0188768	6.01014	0.25	3	17	174	5926
SKCM	GABBR1	623, 783	0.0188944	6.36218	0.25	3	10	275	5832
SKCM	MUC17	1589, 1673	0.0188944	6.36218	0.25	3	10	275	5832
SKCM	SPEN	3249, 3403	0.0188944	6.36218	0.25	3	10	275	5832
LUAD	AHNAK2	3123, 3175	0.0189287	12.967	0.25	2	4	227	5887
READ	ARID1A	1708, 1734	0.018931	10.5953	0.25	2	17	67	6034
READ	KIF20B	955, 1043	0.018931	10.5953	0.25	2	17	67	6034
READ	TPO	640, 712	0.018931	10.5953	0.25	2	17	67	6034
LIHC	TSC1	567, 882	0.019016	6.05846	0.25	3	15	195	5907
KIRP	TP53BP1	548, 773	0.0190633	5.93604	0.25	3	19	158	5940
COAD	ASXL1	42, 229	0.0191305	5.90662	0.25	3	20	151	5946
COAD	ZNF721	271, 438	0.0191305	5.90662	0.25	3	20	151	5946
CESC	ERBB3	40, 623	0.0192518	2.54567	0.25	8	99	185	5828
HNSC	ARID5B	143, 295	0.019445	6.38614	0.25	3	9	303	5805
HNSC	MUC5B	4355, 4388	0.019445	6.38614	0.25	3	9	303	5805
HNSC	ZFHX3	3498, 3668	0.019445	6.38614	0.25	3	9	303	5805
UCEC	MAP7	428, 604	0.0194862	4.35917	0.25	4	22	244	5850
READ	TP53	241, 255	0.0196271	3.03675	0.25	6	184	63	5867
PRAD	CNTNAP1	965, 1065	0.0196811	6.18182	0.25	3	11	258	5848
GBM	OBSCN	6600, 6727	0.0198128	6.24321	0.25	3	10	280	5827
KIRC	PABPC1	414, 545	0.0200531	4.59322	0.25	4	12	413	5691
LUAD	AHNAK2	361, 490	0.0201858	6.00204	0.25	3	13	226	5878
LUAD	CCDC150	200, 351	0.0201858	6.00204	0.25	3	13	226	5878
LUAD	CSDE1	562, 687	0.0201858	6.00204	0.25	3	13	226	5878
LUAD	FAT1	2671, 2775	0.0201858	6.00204	0.25	3	13	226	5878
LUAD	HRNR	1894, 1936	0.0201858	6.00204	0.25	3	13	226	5878
LUAD	KNDC1	1477, 1684	0.0201858	6.00204	0.25	3	13	226	5878
LUAD	MLL3	1162, 1269	0.0201858	6.00204	0.25	3	13	226	5878
LUAD	MUC17	214, 328	0.0201858	6.00204	0.25	3	13	226	5878
LUAD	POLE	1534, 1752	0.0201858	6.00204	0.25	3	13	226	5878
LUAD	SALL1	244, 322	0.0201858	6.00204	0.25	3	13	226	5878
LUAD	ZMIZ1	280, 447	0.0201858	6.00204	0.25	3	13	226	5878
ACC	NF1	1192, 1276	0.0204791	10.0633	0.25	2	20	60	6038
COAD	CTCF	482, 651	0.0205566	4.16	0.25	4	38	150	5928
LAML	IDH2	172, 172	0.0206183	5.83322	0.25	3	16	190	5911
UCS	SPOP	131, 140	0.0206297	9.98512	0.25	2	22	55	6041
LGG	PIK3CA	115, 118	0.0207103	4.32509	0.25	4	19	283	5814
LUSC	MUC5B	3049, 3131	0.0207652	11.3086	0.25	2	6	175	5937
LUSC	SLITRK5	579, 625	0.0207652	11.3086	0.25	2	6	175	5937
UCEC	ARID1A	1900, 1961	0.0208385	5.97959	0.25	3	12	245	5860
UCEC	ASXL1	1246, 1336	0.0208385	5.97959	0.25	3	12	245	5860
UCEC	ATAD5	999, 1187	0.0208385	5.97959	0.25	3	12	245	5860
UCEC	CASP8	52, 78	0.0208385	5.97959	0.25	3	12	245	5860
UCEC	DNER	499, 560	0.0208385	5.97959	0.25	3	12	245	5860
UCEC	ERCC3	32, 142	0.0208385	5.97959	0.25	3	12	245	5860
UCEC	FBXW7	651, 667	0.0208385	5.97959	0.25	3	12	245	5860
UCEC	FRMPD2	465, 558	0.0208385	5.97959	0.25	3	12	245	5860
UCEC	KIF20B	442, 544	0.0208385	5.97959	0.25	3	12	245	5860
UCEC	KNDC1	346, 492	0.0208385	5.97959	0.25	3	12	245	5860
UCEC	MAP3K1	1182, 1283	0.0208385	5.97959	0.25	3	12	245	5860
UCEC	MLL2	5125, 5214	0.0208385	5.97959	0.25	3	12	245	5860
UCEC	MLL3	56, 144	0.0208385	5.97959	0.25	3	12	245	5860
UCEC	MLL4	125, 192	0.0208385	5.97959	0.25	3	12	245	5860
UCEC	MUC5B	1827, 1955	0.0208385	5.97959	0.25	3	12	245	5860
UCEC	MYH10	1821, 1976	0.0208385	5.97959	0.25	3	12	245	5860
UCEC	OBSCN	6068, 6230	0.0208385	5.97959	0.25	3	12	245	5860
UCEC	PCDHGA9	608, 729	0.0208385	5.97959	0.25	3	12	245	5860
UCEC	PLAU	289, 411	0.0208385	5.97959	0.25	3	12	245	5860
UCEC	SMG7	890, 1040	0.0208385	5.97959	0.25	3	12	245	5860
UCEC	SPEN	1934, 2081	0.0208385	5.97959	0.25	3	12	245	5860
UCEC	SV2A	129, 200	0.0208385	5.97959	0.25	3	12	245	5860
UCEC	TAF5	301, 452	0.0208385	5.97959	0.25	3	12	245	5860
UCEC	TBL1XR1	119, 181	0.0208385	5.97959	0.25	3	12	245	5860
UCEC	ZNF385B	1, 69	0.0208385	5.97959	0.25	3	12	245	5860
READ	DNER	151, 259	0.0208829	10.005	0.25	2	18	67	6033
READ	MSH6	912, 993	0.0208829	10.005	0.25	2	18	67	6033
STAD	PPM1D	406, 598	0.0210671	4.20394	0.25	4	26	215	5875
STAD	ZNF471	223, 456	0.0210671	4.20394	0.25	4	26	215	5875
KICH	HNF1A	94, 210	0.0210812	9.92599	0.25	2	19	64	6035
STAD	EMR1	628, 721	0.0212078	5.84028	0.25	3	14	216	5887
STAD	EPHA2	541, 680	0.0212078	5.84028	0.25	3	14	216	5887
STAD	ERCC3	520, 704	0.0212078	5.84028	0.25	3	14	216	5887
STAD	HRNR	2662, 2831	0.0212078	5.84028	0.25	3	14	216	5887
STAD	ITGAL	781, 889	0.0212078	5.84028	0.25	3	14	216	5887
STAD	MED15	287, 519	0.0212078	5.84028	0.25	3	14	216	5887
STAD	MLL3	293, 329	0.0212078	5.84028	0.25	3	14	216	5887
STAD	MUC6	1972, 2021	0.0212078	5.84028	0.25	3	14	216	5887
STAD	NCOR1	461, 627	0.0212078	5.84028	0.25	3	14	216	5887
STAD	NOM1	139, 295	0.0212078	5.84028	0.25	3	14	216	5887
STAD	TNRC18	1477, 1585	0.0212078	5.84028	0.25	3	14	216	5887
STAD	TNRC6B	348, 504	0.0212078	5.84028	0.25	3	14	216	5887
STAD	TNRC6B	1547, 1760	0.0212078	5.84028	0.25	3	14	216	5887
STAD	UNC5A	649, 815	0.0212078	5.84028	0.25	3	14	216	5887
COAD	FN1	1811, 1993	0.0214683	5.62441	0.25	3	21	151	5945
CESC	FBXW7	502, 526	0.0215029	3.40021	0.25	5	46	188	5881
LUSC	SMG7	421, 715	0.0215642	5.67529	0.25	3	18	174	5925
LUSC	ZMYM5	140, 341	0.0215642	5.67529	0.25	3	18	174	5925
SKCM	SPEN	117, 314	0.0215833	4.24964	0.25	4	20	274	5822
BLCA	AHNAK2	3761, 3837	0.0217235	10.3837	0.25	2	9	128	5981
BLCA	HRNR	309, 342	0.0217235	10.3837	0.25	2	9	128	5981
BLCA	TGS1	607, 764	0.0217235	10.3837	0.25	2	9	128	5981
THCA	NUP93	14, 88	0.0218354	4.4224	0.25	4	13	397	5706
BRCA	CDH1	365, 431	0.0219143	3.54223	0.25	6	9	967	5138
UCEC	AHNAK2	3123, 3175	0.0220214	11.9268	0.25	2	4	246	5868
UCEC	CLIC6	430, 703	0.0221668	4.16892	0.25	4	23	244	5849
UCEC	KIT	468, 642	0.0221668	4.16892	0.25	4	23	244	5849
UCEC	RB1	251, 350	0.0221668	4.16892	0.25	4	23	244	5849
UCS	U2AF1	24, 38	0.0222911	9.54941	0.25	2	23	55	6040
BLCA	FBXW7	502, 526	0.022506	4.01418	0.25	4	47	126	5943
READ	CDC27	531, 566	0.0229151	9.47683	0.25	2	19	67	6032
READ	DLC1	19, 123	0.0229151	9.47683	0.25	2	19	67	6032
READ	FAT2	4, 152	0.0229151	9.47683	0.25	2	19	67	6032
SKCM	AHNAK2	4210, 4309	0.0232551	5.78281	0.25	3	11	275	5831
SKCM	ARHGAP35	8, 109	0.0232551	5.78281	0.25	3	11	275	5831
SKCM	MLL2	5381, 5466	0.0232551	5.78281	0.25	3	11	275	5831
SKCM	POM121	993, 1087	0.0232551	5.78281	0.25	3	11	275	5831
SKCM	ZFHX3	3177, 3340	0.0232551	5.78281	0.25	3	11	275	5831
CESC	MED1	984, 1154	0.0237056	5.48916	0.25	3	17	190	5910
STAD	AHNAK2	2194, 2231	0.0237701	10.8682	0.25	2	5	217	5896
LUAD	HRNR	653, 729	0.0238484	5.57238	0.25	3	14	226	5877
LUAD	HRNR	806, 899	0.0238484	5.57238	0.25	3	14	226	5877
LUAD	MLL2	4727, 4915	0.0238484	5.57238	0.25	3	14	226	5877
LUAD	MUC17	2136, 2226	0.0238484	5.57238	0.25	3	14	226	5877
LUAD	NF1	1831, 1896	0.0238484	5.57238	0.25	3	14	226	5877
LUAD	PDZD7	101, 272	0.0238484	5.57238	0.25	3	14	226	5877
LUAD	SORBS2	683, 894	0.0238484	5.57238	0.25	3	14	226	5877
LUAD	TBX3	70, 129	0.0238484	5.57238	0.25	3	14	226	5877
LUAD	VAV3	598, 741	0.0238484	5.57238	0.25	3	14	226	5877
COAD	APC	1277, 1298	0.0239553	5.36785	0.25	3	22	151	5944
COAD	APC	1519, 1583	0.0239553	5.36785	0.25	3	22	151	5944
COAD	L1TD1	52, 138	0.0239553	5.36785	0.25	3	22	151	5944
KIRP	RPTN	489, 591	0.0241164	5.3689	0.25	3	21	158	5938
HNSC	ARID5B	981, 1044	0.0243608	5.74653	0.25	3	10	303	5804
HNSC	BRDT	712, 888	0.0243608	5.74653	0.25	3	10	303	5804
HNSC	EGFR	187, 229	0.0243608	5.74653	0.25	3	10	303	5804
HNSC	PLEC	3838, 4066	0.0243608	5.74653	0.25	3	10	303	5804
GBM	KIF19	234, 389	0.0243707	5.67468	0.25	3	11	280	5826
GBM	MUC17	46, 133	0.0243707	5.67468	0.25	3	11	280	5826
LUAD	CPS1	1004, 1207	0.0243772	4.01026	0.25	4	26	225	5865
CESC	PLEC	1963, 2045	0.0244417	10.3333	0.25	2	6	191	5921
LUSC	KIAA1804	430, 534	0.0244497	5.37568	0.25	3	19	174	5924
LUSC	ZNF337	243, 456	0.0244497	5.37568	0.25	3	19	174	5924
STAD	CREBBP	813, 960	0.024792	5.45	0.25	3	15	216	5886
STAD	FBXW7	479, 481	0.024792	5.45	0.25	3	15	216	5886
STAD	FOXP2	497, 591	0.024792	5.45	0.25	3	15	216	5886
STAD	PCK1	273, 336	0.024792	5.45	0.25	3	15	216	5886
STAD	PLEC	4192, 4352	0.024792	5.45	0.25	3	15	216	5886
STAD	SEMA5B	604, 707	0.024792	5.45	0.25	3	15	216	5886
STAD	SIN3A	537, 692	0.024792	5.45	0.25	3	15	216	5886
STAD	TPO	540, 633	0.024792	5.45	0.25	3	15	216	5886
KIRC	EGFR	827, 843	0.0248476	4.23915	0.25	4	13	413	5690
UCEC	ARID1A	1221, 1287	0.0248956	5.51868	0.25	3	13	245	5859
UCEC	BMP2K	918, 1100	0.0248956	5.51868	0.25	3	13	245	5859
UCEC	CCDC150	200, 351	0.0248956	5.51868	0.25	3	13	245	5859
UCEC	CHD8	1448, 1605	0.0248956	5.51868	0.25	3	13	245	5859
UCEC	CSDE1	562, 687	0.0248956	5.51868	0.25	3	13	245	5859
UCEC	EPAS1	578, 710	0.0248956	5.51868	0.25	3	13	245	5859
UCEC	FAT1	1537, 1689	0.0248956	5.51868	0.25	3	13	245	5859
UCEC	FAT1	2671, 2775	0.0248956	5.51868	0.25	3	13	245	5859
UCEC	FAT1	2825, 2943	0.0248956	5.51868	0.25	3	13	245	5859
UCEC	INTS7	67, 199	0.0248956	5.51868	0.25	3	13	245	5859
UCEC	KIT	882, 973	0.0248956	5.51868	0.25	3	13	245	5859
UCEC	KNDC1	1477, 1684	0.0248956	5.51868	0.25	3	13	245	5859
UCEC	LACTB	363, 502	0.0248956	5.51868	0.25	3	13	245	5859
UCEC	LZTR1	68, 163	0.0248956	5.51868	0.25	3	13	245	5859
UCEC	MKI67	234, 310	0.0248956	5.51868	0.25	3	13	245	5859
UCEC	MLL2	2914, 3103	0.0248956	5.51868	0.25	3	13	245	5859
UCEC	MLL2	4964, 5106	0.0248956	5.51868	0.25	3	13	245	5859
UCEC	MTOR	2206, 2230	0.0248956	5.51868	0.25	3	13	245	5859
UCEC	MUC6	916, 1060	0.0248956	5.51868	0.25	3	13	245	5859
UCEC	NCOR1	1435, 1582	0.0248956	5.51868	0.25	3	13	245	5859
UCEC	NF1	1568, 1668	0.0248956	5.51868	0.25	3	13	245	5859
UCEC	OBSCN	3136, 3292	0.0248956	5.51868	0.25	3	13	245	5859
UCEC	POLE	1534, 1752	0.0248956	5.51868	0.25	3	13	245	5859
UCEC	PTCH1	1366, 1437	0.0248956	5.51868	0.25	3	13	245	5859
UCEC	PTEN	245, 252	0.0248956	5.51868	0.25	3	13	245	5859
UCEC	TEX2	10, 142	0.0248956	5.51868	0.25	3	13	245	5859
UCEC	TXNIP	31, 109	0.0248956	5.51868	0.25	3	13	245	5859
UCEC	ZNF644	367, 524	0.0248956	5.51868	0.25	3	13	245	5859
LGG	NOTCH1	1980, 2085	0.0252844	5.59091	0.25	3	11	284	5822
LGG	PLCG1	1120, 1261	0.0252844	5.59091	0.25	3	11	284	5822
LGG	TP53	262, 265	0.0252844	5.59091	0.25	3	11	284	5822
BLCA	ARID1A	457, 515	0.0257101	9.34375	0.25	2	10	128	5980
BLCA	MKI67	1948, 2069	0.0257101	9.34375	0.25	2	10	128	5980
BLCA	OTOF	408, 502	0.0257101	9.34375	0.25	2	10	128	5980
BLCA	ZNF263	325, 420	0.0257101	9.34375	0.25	2	10	128	5980
STAD	BTBD11	769, 980	0.0261578	3.90233	0.25	4	28	215	5873
UCEC	MUC17	3644, 3815	0.0262675	3.24491	0.25	5	37	243	5835
COAD	MAP7	428, 604	0.0265917	5.1336	0.25	3	23	151	5943
COAD	TCF12	299, 523	0.0265917	5.1336	0.25	3	23	151	5943
CESC	TP53BP1	1733, 1914	0.027029	5.18333	0.25	3	18	190	5909
OV	TP53	164, 187	0.0270835	1.67383	0.25	23	260	293	5544
LUAD	CYP11B1	260, 422	0.0271915	3.86107	0.25	4	27	225	5864
LUAD	DHX57	564, 806	0.0278457	5.2	0.25	3	15	226	5876
LUAD	ECM1	160, 262	0.0278457	5.2	0.25	3	15	226	5876
LUAD	ERBB2	305, 313	0.0278457	5.2	0.25	3	15	226	5876
LUAD	FN1	776, 890	0.0278457	5.2	0.25	3	15	226	5876
LUAD	ITGAL	208, 309	0.0278457	5.2	0.25	3	15	226	5876
LUAD	KDR	328, 400	0.0278457	5.2	0.25	3	15	226	5876
LUAD	MKI67	2258, 2375	0.0278457	5.2	0.25	3	15	226	5876
LUAD	PCDHGB1	189, 281	0.0278457	5.2	0.25	3	15	226	5876
LUAD	SOS1	154, 309	0.0278457	5.2	0.25	3	15	226	5876
LUAD	ZNF781	106, 223	0.0278457	5.2	0.25	3	15	226	5876
ACC	SGK223	34, 272	0.0280778	8.38056	0.25	2	24	60	6034
CESC	NFE2L2	77, 82	0.0281118	3.78002	0.25	4	33	189	5894
SKCM	AHNAK2	4496, 4574	0.0281134	5.3	0.25	3	12	275	5830
SKCM	ASXL2	1010, 1239	0.0281134	5.3	0.25	3	12	275	5830
SKCM	DNER	499, 560	0.0281134	5.3	0.25	3	12	275	5830
SKCM	MCTP1	428, 549	0.0281134	5.3	0.25	3	12	275	5830
SKCM	MUC17	637, 704	0.0281134	5.3	0.25	3	12	275	5830
SKCM	NKX3-1	171, 226	0.0281134	5.3	0.25	3	12	275	5830
SKCM	RB1	536, 580	0.0281134	5.3	0.25	3	12	275	5830
SKCM	TNRC6B	1061, 1310	0.0281134	5.3	0.25	3	12	275	5830
SKCM	ZBTB20	345, 504	0.0281134	5.3	0.25	3	12	275	5830
SKCM	ZNF385B	1, 69	0.0281134	5.3	0.25	3	12	275	5830
SKCM	MAP7	428, 604	0.0282951	3.86198	0.25	4	22	274	5820
STAD	CASZ1	1250, 1419	0.0286815	5.10851	0.25	3	16	216	5885
STAD	GNPTAB	968, 1139	0.0286815	5.10851	0.25	3	16	216	5885
STAD	MLL3	2409, 2524	0.0286815	5.10851	0.25	3	16	216	5885
STAD	MYH10	1293, 1482	0.0286815	5.10851	0.25	3	16	216	5885
STAD	THBS4	487, 680	0.0286815	5.10851	0.25	3	16	216	5885
STAD	ZNF709	152, 272	0.0286815	5.10851	0.25	3	16	216	5885
UCEC	CASP8	325, 409	0.0293462	5.12362	0.25	3	14	245	5858
UCEC	CREBBP	1417, 1471	0.0293462	5.12362	0.25	3	14	245	5858
UCEC	FAT2	1331, 1445	0.0293462	5.12362	0.25	3	14	245	5858
UCEC	FOXP2	255, 346	0.0293462	5.12362	0.25	3	14	245	5858
UCEC	MED15	287, 519	0.0293462	5.12362	0.25	3	14	245	5858
UCEC	MED23	520, 724	0.0293462	5.12362	0.25	3	14	245	5858
UCEC	MLL	2765, 2946	0.0293462	5.12362	0.25	3	14	245	5858
UCEC	NF2	245, 418	0.0293462	5.12362	0.25	3	14	245	5858
UCEC	PCNXL2	446, 585	0.0293462	5.12362	0.25	3	14	245	5858
UCEC	PDILT	11, 76	0.0293462	5.12362	0.25	3	14	245	5858
UCEC	PLCG1	873, 1031	0.0293462	5.12362	0.25	3	14	245	5858
UCEC	RAE1	186, 280	0.0293462	5.12362	0.25	3	14	245	5858
UCEC	RB1	53, 97	0.0293462	5.12362	0.25	3	14	245	5858
UCEC	SMARCA4	1339, 1471	0.0293462	5.12362	0.25	3	14	245	5858
UCEC	SORBS2	683, 894	0.0293462	5.12362	0.25	3	14	245	5858
UCEC	UNC5A	649, 815	0.0293462	5.12362	0.25	3	14	245	5858
UCEC	VEPH1	358, 507	0.0293462	5.12362	0.25	3	14	245	5858
UCEC	ZMIZ1	659, 860	0.0293462	5.12362	0.25	3	14	245	5858
COAD	FRMPD2	78, 195	0.0293771	4.91887	0.25	3	24	151	5942
COAD	TRIOBP	173, 373	0.0293771	4.91887	0.25	3	24	151	5942
GBM	PIK3R1	576, 582	0.0294445	5.20089	0.25	3	12	280	5825
GBM	SEMG1	316, 417	0.0294445	5.20089	0.25	3	12	280	5825
HNSC	EPHA2	302, 500	0.0294943	3.83709	0.25	4	20	302	5794
COAD	GATA3	108, 158	0.0298118	8.70906	0.25	2	9	152	5957
COAD	MET	187, 238	0.0298118	8.70906	0.25	2	9	152	5957
COAD	UNC5D	39, 89	0.0298118	8.70906	0.25	2	9	152	5957
KIRP	SGK223	34, 272	0.0298227	4.90039	0.25	3	23	158	5936
HNSC	DLC1	272, 367	0.0298822	5.22322	0.25	3	11	303	5803
HNSC	MUC17	918, 956	0.0298822	5.22322	0.25	3	11	303	5803
HNSC	NSD1	589, 728	0.0298822	5.22322	0.25	3	11	303	5803
HNSC	SLITRK5	632, 692	0.0298822	5.22322	0.25	3	11	303	5803
GBM	PTEN	61, 76	0.0299634	3.78951	0.25	4	22	279	5815
BLCA	ANGPT4	417, 492	0.0299679	8.4929	0.25	2	11	128	5979
BLCA	HRNR	2126, 2144	0.0299679	8.4929	0.25	2	11	128	5979
BLCA	MLL2	3536, 3646	0.0299679	8.4929	0.25	2	11	128	5979
BLCA	MLL3	4565, 4714	0.0299679	8.4929	0.25	2	11	128	5979
BLCA	MUC5B	5081, 5301	0.0299679	8.4929	0.25	2	11	128	5979
BLCA	PLEC	3838, 4066	0.0299679	8.4929	0.25	2	11	128	5979
BLCA	SMARCA4	740, 828	0.0299679	8.4929	0.25	2	11	128	5979
BRCA	CTCF	256, 314	0.0304604	3.18738	0.25	6	10	967	5137
BRCA	ERBB2	767, 781	0.0304604	3.18738	0.25	6	10	967	5137
CESC	EP300	479, 648	0.0305879	4.9097	0.25	3	19	190	5908
CESC	PLEC	2310, 2385	0.0307811	8.85565	0.25	2	7	191	5920
LUSC	SOS1	1050, 1292	0.030814	4.86207	0.25	3	21	174	5922
STAD	SLITRK5	579, 625	0.0309551	9.0553	0.25	2	6	217	5895
STAD	ZNF598	93, 273	0.0309551	9.0553	0.25	2	6	217	5895
LGG	TCF12	299, 523	0.0313401	3.73338	0.25	4	22	283	5811
UCEC	THBS1	417, 755	0.0315064	3.686	0.25	4	26	244	5846
UCEC	THBS1	974, 1149	0.0315064	3.686	0.25	4	26	244	5846
SKCM	KIT	468, 642	0.0320663	3.69343	0.25	4	23	274	5819
LUSC	IBTK	610, 752	0.0321309	8.47857	0.25	2	8	175	5935
LUSC	OBSCN	4143, 4286	0.0321309	8.47857	0.25	2	8	175	5935
LUSC	TNRC18	1689, 1820	0.0321309	8.47857	0.25	2	8	175	5935
LUAD	CASZ1	1250, 1419	0.0321761	4.87417	0.25	3	16	226	5875
LUAD	IRS1	651, 776	0.0321761	4.87417	0.25	3	16	226	5875
LUAD	KLHL1	221, 292	0.0321761	4.87417	0.25	3	16	226	5875
LUAD	TBX3	280, 418	0.0321761	4.87417	0.25	3	16	226	5875
LUAD	TPO	640, 712	0.0321761	4.87417	0.25	3	16	226	5875
COAD	PCDHGA9	32, 218	0.0323106	4.72132	0.25	3	25	151	5941
COAD	TP53	330, 335	0.0323106	4.72132	0.25	3	25	151	5941
KIRP	DSPP	1060, 1079	0.0323699	8.31586	0.25	2	9	159	5950
OV	CHD4	569, 659	0.0324732	5.04763	0.25	3	11	313	5793
OV	MTOR	989, 1160	0.0324732	5.04763	0.25	3	11	313	5793
OV	TP53	262, 265	0.0324732	5.04763	0.25	3	11	313	5793
BRCA	MAP2K4	224, 306	0.0326641	2.51976	0.25	9	19	964	5128
STAD	JAKMIP2	250, 334	0.0328746	4.80719	0.25	3	17	216	5884
STAD	JAKMIP2	476, 558	0.0328746	4.80719	0.25	3	17	216	5884
STAD	KIT	2, 74	0.0328746	4.80719	0.25	3	17	216	5884
STAD	OR2L8	116, 153	0.0328746	4.80719	0.25	3	17	216	5884
STAD	PER3	898, 1162	0.0328746	4.80719	0.25	3	17	216	5884
STAD	SLC26A8	18, 178	0.0328746	4.80719	0.25	3	17	216	5884
STAD	ZFHX3	30, 177	0.0328746	4.80719	0.25	3	17	216	5884
SKCM	AHNAK2	4341, 4446	0.0334667	4.89147	0.25	3	13	275	5829
SKCM	ALPK2	508, 626	0.0334667	4.89147	0.25	3	13	275	5829
SKCM	ANGPT4	71, 158	0.0334667	4.89147	0.25	3	13	275	5829
SKCM	BRDT	136, 246	0.0334667	4.89147	0.25	3	13	275	5829
SKCM	CIC	435, 517	0.0334667	4.89147	0.25	3	13	275	5829
SKCM	GAS2L2	432, 523	0.0334667	4.89147	0.25	3	13	275	5829
SKCM	GPRIN2	352, 453	0.0334667	4.89147	0.25	3	13	275	5829
SKCM	MLL	3045, 3202	0.0334667	4.89147	0.25	3	13	275	5829
SKCM	MUC5B	4924, 5049	0.0334667	4.89147	0.25	3	13	275	5829
SKCM	PDGFRA	487, 560	0.0334667	4.89147	0.25	3	13	275	5829
SKCM	RASGRF2	459, 526	0.0334667	4.89147	0.25	3	13	275	5829
SKCM	SLC26A3	131, 247	0.0334667	4.89147	0.25	3	13	275	5829
SKCM	SLC4A3	48, 171	0.0334667	4.89147	0.25	3	13	275	5829
SKCM	TEX2	10, 142	0.0334667	4.89147	0.25	3	13	275	5829
SKCM	TXNIP	31, 109	0.0334667	4.89147	0.25	3	13	275	5829
SKCM	UNC5A	364, 529	0.0334667	4.89147	0.25	3	13	275	5829
PRAD	MED15	287, 519	0.0334712	4.85465	0.25	3	14	258	5845
PRAD	TNRC18	577, 734	0.0334712	4.85465	0.25	3	14	258	5845
HNSC	APC	1519, 1583	0.0337734	3.65374	0.25	4	21	302	5793
HNSC	RHOA	22, 76	0.0337734	3.65374	0.25	4	21	302	5793
HNSC	TAOK2	113, 326	0.0337734	3.65374	0.25	4	21	302	5793
GBM	RB1	251, 350	0.0339357	3.62412	0.25	4	23	279	5814
UCEC	ALPK2	1833, 1971	0.0341878	4.78122	0.25	3	15	245	5857
UCEC	AXIN1	610, 810	0.0341878	4.78122	0.25	3	15	245	5857
UCEC	CD209	233, 357	0.0341878	4.78122	0.25	3	15	245	5857
UCEC	CDC27	28, 130	0.0341878	4.78122	0.25	3	15	245	5857
UCEC	CHD4	714, 820	0.0341878	4.78122	0.25	3	15	245	5857
UCEC	KDR	328, 400	0.0341878	4.78122	0.25	3	15	245	5857
UCEC	LZTR1	243, 324	0.0341878	4.78122	0.25	3	15	245	5857
UCEC	MYB	257, 449	0.0341878	4.78122	0.25	3	15	245	5857
UCEC	PDGFRA	245, 313	0.0341878	4.78122	0.25	3	15	245	5857
UCEC	PLEC	4192, 4352	0.0341878	4.78122	0.25	3	15	245	5857
UCEC	SOS1	154, 309	0.0341878	4.78122	0.25	3	15	245	5857
UCEC	TPO	540, 633	0.0341878	4.78122	0.25	3	15	245	5857
UCEC	USP28	178, 255	0.0341878	4.78122	0.25	3	15	245	5857
UCEC	ZNF781	106, 223	0.0341878	4.78122	0.25	3	15	245	5857
OV	TP53	146, 159	0.0343332	2.0433	0.25	12	110	304	5694
BLCA	ECM1	336, 459	0.0344839	7.78385	0.25	2	12	128	5978
BLCA	EP300	708, 840	0.0344839	7.78385	0.25	2	12	128	5978
BLCA	FAT1	1915, 2049	0.0344839	7.78385	0.25	2	12	128	5978
BLCA	PLCG1	1120, 1261	0.0344839	7.78385	0.25	2	12	128	5978
BLCA	RB1	695, 761	0.0344839	7.78385	0.25	2	12	128	5978
BLCA	RBBP6	496, 602	0.0344839	7.78385	0.25	2	12	128	5978
BLCA	RBM26	21, 194	0.0344839	7.78385	0.25	2	12	128	5978
BLCA	SMARCA4	1083, 1162	0.0344839	7.78385	0.25	2	12	128	5978
BLCA	SOS1	404, 478	0.0344839	7.78385	0.25	2	12	128	5978
BLCA	TBL1XR1	302, 394	0.0344839	7.78385	0.25	2	12	128	5978
BLCA	TRIM9	143, 219	0.0344839	7.78385	0.25	2	12	128	5978
GBM	NF1	420, 482	0.0350303	4.8	0.25	3	13	280	5824
GBM	SLC26A3	131, 247	0.0350303	4.8	0.25	3	13	280	5824
UCEC	ANKRD12	537, 812	0.0350607	3.54888	0.25	4	27	244	5845
STAD	ASXL1	480, 906	0.0350683	3.52288	0.25	4	31	215	5870
COAD	ADNP	938, 1058	0.0351924	7.83684	0.25	2	10	152	5956
COAD	AHCY	196, 352	0.0351924	7.83684	0.25	2	10	152	5956
COAD	CDHR5	75, 209	0.0351924	7.83684	0.25	2	10	152	5956
COAD	OBSCN	2573, 2735	0.0351924	7.83684	0.25	2	10	152	5956
COAD	PCDHA2	22, 82	0.0351924	7.83684	0.25	2	10	152	5956
COAD	TOX4	223, 452	0.0351924	7.83684	0.25	2	10	152	5956
COAD	JAKMIP2	34, 163	0.0353916	4.53897	0.25	3	26	151	5940
HNSC	AHNAK2	4496, 4574	0.0360041	4.78713	0.25	3	12	303	5802
HNSC	HLA-B	216, 266	0.0360041	4.78713	0.25	3	12	303	5802
HNSC	MLL2	1589, 1764	0.0360041	4.78713	0.25	3	12	303	5802
HNSC	MUC17	975, 1029	0.0360041	4.78713	0.25	3	12	303	5802
HNSC	MYH9	488, 567	0.0360041	4.78713	0.25	3	12	303	5802
HNSC	TAF5	301, 452	0.0360041	4.78713	0.25	3	12	303	5802
HNSC	ZNF385B	1, 69	0.0360041	4.78713	0.25	3	12	303	5802
SKCM	DHX57	902, 1235	0.0361181	3.53893	0.25	4	24	274	5818
SKCM	EGFR	45, 160	0.0361181	3.53893	0.25	4	24	274	5818
READ	FRMPD2	78, 195	0.0366819	7.19522	0.25	2	25	67	6026
LUAD	DNER	151, 259	0.0368367	4.58667	0.25	3	17	226	5874
LUAD	OTOF	1548, 1761	0.0368367	4.58667	0.25	3	17	226	5874
LUAD	SETD2	1207, 1368	0.0368367	4.58667	0.25	3	17	226	5874
STAD	DLC1	19, 123	0.0373687	4.53935	0.25	3	18	216	5883
STAD	DNER	663, 730	0.0373687	4.53935	0.25	3	18	216	5883
STAD	FAT1	2413, 2533	0.0373687	4.53935	0.25	3	18	216	5883
STAD	ING1	339, 378	0.0373687	4.53935	0.25	3	18	216	5883
STAD	NF1	520, 666	0.0373687	4.53935	0.25	3	18	216	5883
STAD	NUP93	262, 486	0.0373687	4.53935	0.25	3	18	216	5883
CESC	HRNR	1685, 1794	0.03769	7.74738	0.25	2	8	191	5919
LUSC	MLL3	338, 380	0.0379622	4.43778	0.25	3	23	174	5920
KIRP	SF3B1	34, 185	0.0381837	7.48302	0.25	2	10	159	5949
GBM	AHNAK2	2194, 2231	0.038355	8.30178	0.25	2	5	281	5832
CESC	MYH9	1472, 1792	0.0384053	4.4406	0.25	3	21	190	5906
CESC	SOS1	1050, 1292	0.0384053	4.4406	0.25	3	21	190	5906
LUSC	GATA3	108, 158	0.0385363	7.53524	0.25	2	9	175	5934
LUSC	GUSB	467, 602	0.0385363	7.53524	0.25	2	9	175	5934
LUSC	NOTCH1	2327, 2487	0.0385363	7.53524	0.25	2	9	175	5934
LUSC	SMARCA4	601, 697	0.0385363	7.53524	0.25	2	9	175	5934
LUSC	TPP2	197, 329	0.0385363	7.53524	0.25	2	9	175	5934
LUSC	TSC2	843, 1113	0.0385363	7.53524	0.25	2	9	175	5934
LUSC	ZFHX3	2361, 2479	0.0385363	7.53524	0.25	2	9	175	5934
LUSC	ZHX2	179, 258	0.0385363	7.53524	0.25	2	9	175	5934
COAD	PPM1D	406, 598	0.0386187	4.37013	0.25	3	27	151	5939
COAD	PPP2R1A	167, 183	0.0386187	4.37013	0.25	3	27	151	5939
COAD	THBS1	417, 755	0.0386187	4.37013	0.25	3	27	151	5939
STAD	PCDHGB1	84, 157	0.0388749	7.76037	0.25	2	7	217	5894
STAD	SYNGAP1	852, 1019	0.0388749	7.76037	0.25	2	7	217	5894
STAD	ZBTB20	190, 248	0.0388749	7.76037	0.25	2	7	217	5894
UCEC	GABBR1	269, 408	0.0389647	7.94851	0.25	2	6	246	5866
UCEC	PLEC	1963, 2045	0.0389647	7.94851	0.25	2	6	246	5866
UCEC	ZNF598	93, 273	0.0389647	7.94851	0.25	2	6	246	5866
READ	APC	918, 984	0.0392211	6.91734	0.25	2	26	67	6025
READ	DNMT1	1231, 1507	0.0392211	6.91734	0.25	2	26	67	6025
READ	TP53	330, 335	0.0392211	6.91734	0.25	2	26	67	6025
BLCA	ASXL1	1246, 1336	0.0392453	7.18389	0.25	2	13	128	5977
BLCA	CRAT	405, 599	0.0392453	7.18389	0.25	2	13	128	5977
BLCA	EP300	1389, 1409	0.0392453	7.18389	0.25	2	13	128	5977
BLCA	FAT1	3982, 4147	0.0392453	7.18389	0.25	2	13	128	5977
BLCA	MEPCE	203, 363	0.0392453	7.18389	0.25	2	13	128	5977
BLCA	MLL2	668, 829	0.0392453	7.18389	0.25	2	13	128	5977
BLCA	RB1	536, 580	0.0392453	7.18389	0.25	2	13	128	5977
BLCA	SEMA5B	218, 328	0.0392453	7.18389	0.25	2	13	128	5977
BLCA	SMG7	890, 1040	0.0392453	7.18389	0.25	2	13	128	5977
SKCM	ALB	112, 197	0.0393091	4.5413	0.25	3	14	275	5828
SKCM	ARHGAP18	116, 266	0.0393091	4.5413	0.25	3	14	275	5828
SKCM	CASP8	325, 409	0.0393091	4.5413	0.25	3	14	275	5828
SKCM	EPHA2	541, 680	0.0393091	4.5413	0.25	3	14	275	5828
SKCM	ITGAL	781, 889	0.0393091	4.5413	0.25	3	14	275	5828
SKCM	MLL2	1200, 1290	0.0393091	4.5413	0.25	3	14	275	5828
SKCM	MLL3	885, 1002	0.0393091	4.5413	0.25	3	14	275	5828
SKCM	MUC17	1394, 1466	0.0393091	4.5413	0.25	3	14	275	5828
SKCM	PSIP1	274, 354	0.0393091	4.5413	0.25	3	14	275	5828
SKCM	RET	348, 480	0.0393091	4.5413	0.25	3	14	275	5828
SKCM	SLC28A1	387, 542	0.0393091	4.5413	0.25	3	14	275	5828
SKCM	TIGD4	96, 201	0.0393091	4.5413	0.25	3	14	275	5828
SKCM	TRERF1	1118, 1182	0.0393091	4.5413	0.25	3	14	275	5828
SKCM	ZFHX3	285, 417	0.0393091	4.5413	0.25	3	14	275	5828
UCEC	ALPK2	1988, 2145	0.0394158	4.48163	0.25	3	16	245	5856
UCEC	ARAP3	924, 1091	0.0394158	4.48163	0.25	3	16	245	5856
UCEC	ARID1A	521, 576	0.0394158	4.48163	0.25	3	16	245	5856
UCEC	ATM	597, 749	0.0394158	4.48163	0.25	3	16	245	5856
UCEC	FRMPD2	733, 795	0.0394158	4.48163	0.25	3	16	245	5856
UCEC	GIGYF2	698, 872	0.0394158	4.48163	0.25	3	16	245	5856
UCEC	KLHL1	330, 403	0.0394158	4.48163	0.25	3	16	245	5856
UCEC	KLHL5	260, 404	0.0394158	4.48163	0.25	3	16	245	5856
UCEC	MAP3K1	305, 370	0.0394158	4.48163	0.25	3	16	245	5856
UCEC	MUC17	2558, 2669	0.0394158	4.48163	0.25	3	16	245	5856
UCEC	OTOF	71, 220	0.0394158	4.48163	0.25	3	16	245	5856
UCEC	PER3	643, 884	0.0394158	4.48163	0.25	3	16	245	5856
UCEC	SLC1A3	207, 318	0.0394158	4.48163	0.25	3	16	245	5856
UCEC	THBS4	487, 680	0.0394158	4.48163	0.25	3	16	245	5856
UCEC	ZBTB7C	110, 193	0.0394158	4.48163	0.25	3	16	245	5856
UCEC	ZRANB3	391, 704	0.0394158	4.48163	0.25	3	16	245	5856
LIHC	TSC1	328, 477	0.0395005	7.54337	0.25	2	8	196	5914
COAD	ANGPT4	417, 492	0.0409161	7.12321	0.25	2	11	152	5955
COAD	ERCC2	383, 554	0.0409161	7.12321	0.25	2	11	152	5955
COAD	PER3	61, 252	0.0409161	7.12321	0.25	2	11	152	5955
COAD	SMARCA4	740, 828	0.0409161	7.12321	0.25	2	11	152	5955
COAD	ZNF687	287, 462	0.0409161	7.12321	0.25	2	11	152	5955
GBM	ZMIZ1	659, 860	0.0411213	4.45638	0.25	3	14	280	5823
LUAD	DLC1	19, 123	0.0418232	4.33112	0.25	3	18	226	5873
LUAD	FAT1	2413, 2533	0.0418232	4.33112	0.25	3	18	226	5873
LUAD	MKI67	1598, 1698	0.0418232	4.33112	0.25	3	18	226	5873
LUAD	MSH4	448, 575	0.0418232	4.33112	0.25	3	18	226	5873
READ	APC	1105, 1128	0.0418253	6.66003	0.25	2	27	67	6024
READ	JAKMIP2	34, 163	0.0418253	6.66003	0.25	2	27	67	6024
LUSC	KIT	468, 642	0.0418259	4.25216	0.25	3	24	174	5919
STAD	NOTCH2	1630, 1800	0.04216	4.29971	0.25	3	19	216	5882
STAD	PCDHA2	668, 763	0.04216	4.29971	0.25	3	19	216	5882
STAD	SMARCA4	966, 1068	0.04216	4.29971	0.25	3	19	216	5882
LUAD	AHNAK2	4594, 4697	0.0421899	7.40592	0.25	2	7	227	5884
LUAD	FAT1	785, 866	0.0421899	7.40592	0.25	2	7	227	5884
LUAD	GABBR1	29, 115	0.0421899	7.40592	0.25	2	7	227	5884
LUAD	PCDHGB1	84, 157	0.0421899	7.40592	0.25	2	7	227	5884
LUAD	PLEC	2310, 2385	0.0421899	7.40592	0.25	2	7	227	5884
LUAD	SYNGAP1	852, 1019	0.0421899	7.40592	0.25	2	7	227	5884
UCEC	TP53	231, 240	0.0425347	2.30734	0.25	7	73	241	5799
LGG	TRERF1	1118, 1182	0.0426021	4.39059	0.25	3	14	284	5819
PRAD	PLEC	1285, 1347	0.0426471	inf	0.25	1	0	260	5859
HNSC	CASP8	94, 128	0.0427173	4.41813	0.25	3	13	303	5801
HNSC	CASZ1	503, 612	0.0427173	4.41813	0.25	3	13	303	5801
HNSC	FAT1	1537, 1689	0.0427173	4.41813	0.25	3	13	303	5801
HNSC	GIGYF2	498, 613	0.0427173	4.41813	0.25	3	13	303	5801
HNSC	INTS7	241, 398	0.0427173	4.41813	0.25	3	13	303	5801

## Sheet: T6A_m2c_global_gexp
gene	cluster	cancer	global gexp association pval	false discovery rate	missense mutations	nonsense mutations	silent mutations	non-synonymous less than cluster(s)	cluster(s) less than non-synonymous	overlapping domains
TP53	any non-synonymous	BRCA	1.02123e-108	0.01	176	103	5	TRUE	FALSE
BRAF	600, 601	THCA	8.47884e-82	0.01	235	0	0	FALSE	TRUE
BRAF	any non-synonymous	THCA	6.438e-80	0.01	235	2	1	FALSE	TRUE
CIC	any non-synonymous	LGG	4.674e-69	0.01	30	33	1	TRUE	FALSE
TP53	any non-synonymous	LGG	2.05691e-60	0.01	150	29	2	TRUE	FALSE
CDH1	any non-synonymous	BRCA	1.01465e-34	0.01	19	82	3	TRUE	FALSE
TP53	any non-synonymous	UCEC	7.94261e-34	0.01	57	16	2	TRUE	FALSE
PIK3CA	any non-synonymous	BRCA	2.95824e-28	0.01	345	7	6	TRUE	FALSE
CTNNB1	25, 45	UCEC	1.18437e-24	0.01	67	0	0	FALSE	TRUE
PTEN	any non-synonymous	UCEC	1.89134e-21	0.01	103	140	5	TRUE	FALSE
CTNNB1	any non-synonymous	UCEC	2.65686e-21	0.01	80	0	7	FALSE	TRUE
NOTCH1	any non-synonymous	LGG	4.14296e-20	0.01	15	18	1	TRUE	FALSE
FUBP1	any non-synonymous	LGG	3.83794e-18	0.01	2	20	1	TRUE	FALSE
CIC	174, 253	LGG	6.31432e-16	0.01	17	1	0	TRUE	FALSE
CIC	1459, 1532	LGG	1.82263e-15	0.01	12	2	0	TRUE	FALSE
CTNNB1	25, 45	LIHC	4.18939e-14	0.01	35	2	0	FALSE	TRUE
BRAF	600, 601	SKCM	1.91332e-13	0.01	106	0	0	FALSE	TRUE
PIK3CA	539, 547	BRCA	6.10891e-13	0.01	121	0	0	TRUE	FALSE
NOTCH1	37, 81	LGG	1.29882e-12	0.01	1	11	0	TRUE	FALSE
CTNNB1	any non-synonymous	LIHC	1.68797e-12	0.01	50	3	1	FALSE	TRUE
TP53	any non-synonymous	HNSC	1.68637e-11	0.01	144	84	5	TRUE	FALSE
GATA3	any non-synonymous	BRCA	7.14613e-11	0.01	9	70	2	TRUE	FALSE
BRAF	any non-synonymous	SKCM	1.45868e-10	0.01	123	3	2	FALSE	TRUE
BAP1	any non-synonymous	KIRC	1.62362e-10	0.01	17	20	1	TRUE	FALSE
TP53	164, 187	BRCA	3.41333e-10	0.01	36	15	0	TRUE	FALSE
TP53	192, 201	BRCA	3.55568e-10	0.01	17	14	0	TRUE	FALSE
MAP3K1	any non-synonymous	BRCA	5.41272e-10	0.01	17	78	3	TRUE	FALSE
NSD1	any non-synonymous	HNSC	3.19882e-09	0.01	14	24	1	TRUE	FALSE
TP53	266, 279	LGG	3.45018e-09	0.01	53	3	0	TRUE	FALSE
TP53	203, 216	BRCA	1.43502e-08	0.01	12	9	0	TRUE	FALSE
TP53	any non-synonymous	LIHC	3.52941e-08	0.01	40	17	1	TRUE	FALSE
MLL3	any non-synonymous	SKCM	4.18721e-08	0.01	51	5	13	TRUE	FALSE
PBRM1	any non-synonymous	KIRC	1.17081e-07	0.01	24	102	4	TRUE	FALSE
TP53	any non-synonymous	LAML	1.37059e-07	0.01	10	5	1	TRUE	FALSE
TP53	266, 279	UCEC	5.39937e-07	0.01	12	2	0	TRUE	FALSE
FGFR3	any non-synonymous	BLCA	5.40049e-07	0.01	19	1	2	TRUE	FALSE
TP53	any non-synonymous	LUAD	6.66495e-07	0.01	78	35	2	TRUE	FALSE
PIK3CA	1043, 1049	BRCA	9.39074e-07	0.01	147	0	0	TRUE	FALSE
TP53	any non-synonymous	GBM	1.07092e-06	0.01	77	12	1	TRUE	FALSE
SBNO1	any non-synonymous	UCEC	1.28372e-06	0.01	14	3	3	TRUE	FALSE
TP53	266, 279	BRCA	3.0355e-06	0.01	28	3	1	TRUE	FALSE
PIK3CA	any non-synonymous	STAD	7.88869e-06	0.01	61	1	2	TRUE	FALSE
FGFR3	248, 254	BLCA	1.39845e-05	0.01	11	0	0	TRUE	FALSE
TP53	336, 344	BRCA	2.26588e-05	0.01	3	8	0	TRUE	FALSE
FUBP1	88, 206	LGG	3.59422e-05	0.01	1	6	0	TRUE	FALSE	102-164, G4T4Y1.1;
TP53	any non-synonymous	COAD	4.77015e-05	0.01	49	26	1	TRUE	FALSE
GATA3	390, 421	BRCA	5.18788e-05	0.01	1	22	0	TRUE	FALSE
PTEN	116, 146	UCEC	5.83252e-05	0.01	66	16	0	TRUE	FALSE
TP53	146, 159	LGG	7.40598e-05	0.01	10	4	0	TRUE	FALSE
TP53	103, 115	BRCA	8.06186e-05	0.01	4	11	0	TRUE	FALSE
CBFB	any non-synonymous	BRCA	0.000140758	0.01	13	10	1	TRUE	FALSE
ZBTB20	any non-synonymous	STAD	0.000231089	0.01	13	9	7	TRUE	FALSE
ZBTB20	681, 714	STAD	0.00027208	0.01	0	9	0	TRUE	FALSE
TP53	any non-synonymous	STAD	0.000324273	0.01	65	33	1	TRUE	FALSE
TP53	218, 222	BRCA	0.000372076	0.01	8	0	0	TRUE	FALSE
FUBP1	492, 604	LGG	0.00040271	0.01	0	5	0	TRUE	FALSE
ARID1A	any non-synonymous	STAD	0.000470597	0.01	16	27	2	TRUE	FALSE
PGM5	88, 98	STAD	0.000514715	0.01	18	2	1	FALSE	TRUE	19-163, G4YID5.1;
CBFB	48, 112	BRCA	0.000560911	0.01	8	8	1	TRUE	FALSE
TP53	203, 216	UCEC	0.000624637	0.01	11	0	0	TRUE	FALSE
PTEN	39, 52	UCEC	0.000654111	0.01	1	8	0	TRUE	FALSE
TP53	192, 201	LGG	0.000675243	0.01	7	3	0	TRUE	FALSE
JUB	any non-synonymous	HNSC	0.000690487	0.05	5	14	1	TRUE	FALSE
TP53	164, 187	UCEC	0.000775318	0.05	6	3	0	TRUE	FALSE
FBXW7	465, 465	COAD	0.000914473	0.05	8	0	0	FALSE	TRUE
MKL1	any non-synonymous	SKCM	0.000991142	0.05	16	1	3	TRUE	FALSE
GATA3	325, 334	BRCA	0.00109099	0.05	1	15	0	TRUE	FALSE
ZFHX3	any non-synonymous	UCEC	0.00117649	0.05	57	22	13	TRUE	FALSE
FAT1	any non-synonymous	UCEC	0.00125967	0.05	69	21	27	TRUE	FALSE
POLE	any non-synonymous	COAD	0.00129536	0.05	16	1	1	TRUE	FALSE
KIT	any non-synonymous	UCEC	0.00132513	0.05	20	4	3	TRUE	FALSE
KIF20B	any non-synonymous	UCEC	0.00132834	0.05	38	7	4	TRUE	FALSE
PLCG1	any non-synonymous	STAD	0.00138069	0.05	15	1	2	TRUE	FALSE
PPP2R1A	167, 183	UCEC	0.0013856	0.05	11	0	0	FALSE	TRUE	166-196, H9IDD5.1;
TP53	241, 255	UCEC	0.00140875	0.05	7	1	0	TRUE	FALSE
NOTCH1	any non-synonymous	HNSC	0.00143888	0.05	36	24	5	TRUE	FALSE
FBXW7	any non-synonymous	STAD	0.00144338	0.05	15	4	1	TRUE	FALSE
CREBBP	any non-synonymous	STAD	0.00158927	0.05	21	5	9	TRUE	FALSE
SBNO1	1084, 1244	UCEC	0.00164571	0.05	5	0	0	TRUE	FALSE
KRAS	any non-synonymous	UCEC	0.00176923	0.05	52	0	2	TRUE	FALSE
PBRM1	528, 666	KIRC	0.00208413	0.05	8	10	1	TRUE	FALSE	532-613, G4T9C2.1;
PGM5	any non-synonymous	STAD	0.00218908	0.05	23	2	1	FALSE	TRUE
MYH10	any non-synonymous	UCEC	0.00227239	0.05	24	6	5	TRUE	FALSE
SF3B1	any non-synonymous	SKCM	0.00229786	0.05	15	1	3	TRUE	FALSE
PTEN	any non-synonymous	STAD	0.00256506	0.05	11	6	4	TRUE	FALSE
ROBO3	any non-synonymous	UCEC	0.00257121	0.05	16	0	4	TRUE	FALSE
CDH1	144, 222	BRCA	0.00274398	0.05	3	14	0	TRUE	FALSE	159-253, Cadherin;
SEMA3C	any non-synonymous	BRCA	0.00286329	0.05	5	2	2	TRUE	FALSE
ARID1A	any non-synonymous	UCEC	0.00309467	0.05	15	90	5	TRUE	FALSE
CDH1	644, 733	BRCA	0.00312542	0.05	2	9	0	TRUE	FALSE
IDH1	any non-synonymous	SKCM	0.00341246	0.05	15	0	2	TRUE	FALSE
MLL2	any non-synonymous	UCEC	0.00353712	0.05	49	7	11	TRUE	FALSE
RB1	any non-synonymous	UCEC	0.00355365	0.05	18	9	4	TRUE	FALSE
SETD2	any non-synonymous	KIRC	0.00356119	0.05	20	27	1	TRUE	FALSE
JAKMIP2	34, 163	UCEC	0.0036867	0.05	4	2	2	FALSE	TRUE
TGFBR2	any non-synonymous	COAD	0.00426923	0.05	5	2	2	TRUE	FALSE
TP53	any non-synonymous	BLCA	0.00465558	0.05	56	18	1	TRUE	FALSE
TIGD4	any non-synonymous	UCEC	0.004666	0.05	11	4	2	TRUE	FALSE
RB1	any non-synonymous	LIHC	0.00501494	0.05	3	10	1	TRUE	FALSE
SKI	any non-synonymous	KIRP	0.00551374	0.1	6	0	1	TRUE	FALSE
SLC26A3	any non-synonymous	UCEC	0.00560465	0.1	17	1	2	TRUE	FALSE
TP53	241, 255	BRCA	0.00565465	0.1	7	6	0	TRUE	FALSE
RAB3GAP1	any non-synonymous	UCEC	0.00580335	0.1	16	1	2	TRUE	FALSE
TP53	any non-synonymous	LUSC	0.00607685	0.1	100	37	7	TRUE	FALSE
POLE	any non-synonymous	UCEC	0.00620065	0.1	46	1	14	TRUE	FALSE
JAKMIP2	any non-synonymous	UCEC	0.00622754	0.1	17	5	3	FALSE	TRUE
RB1	any non-synonymous	BRCA	0.00647023	0.1	5	16	3	TRUE	FALSE
C9orf102	any non-synonymous	STAD	0.0066405	0.1	12	0	3	TRUE	FALSE
JUB	279, 465	HNSC	0.00665353	0.1	5	8	0	TRUE	FALSE	338-394, LIM;
GPR128	any non-synonymous	UCEC	0.00679948	0.1	15	0	7	TRUE	FALSE
CREBBP	any non-synonymous	UCEC	0.0068462	0.1	28	5	8	TRUE	FALSE
IDH1	132, 132	SKCM	0.00735075	0.1	12	0	0	TRUE	FALSE
TP53	164, 187	READ	0.00810481	0.1	6	0	0	FALSE	TRUE
CTCF	any non-synonymous	UCEC	0.00815472	0.1	19	30	1	TRUE	FALSE
PCNXL2	1869, 2041	SKCM	0.00820968	0.1	4	2	4	FALSE	TRUE
PDGFRA	any non-synonymous	UCEC	0.0083577	0.1	20	4	3	TRUE	FALSE
TP53	280, 289	BRCA	0.00864645	0.1	14	1	1	TRUE	FALSE
CDH1	63, 113	BRCA	0.00913836	0.1	0	8	0	TRUE	FALSE
PTPRF	1265, 1415	UCEC	0.00986323	0.1	4	1	1	FALSE	TRUE
PIK3R1	any non-synonymous	UCEC	0.00986931	0.1	21	89	1	TRUE	FALSE
RB1	114, 170	UCEC	0.0103306	0.1	2	3	0	TRUE	FALSE	105-229, DUF3452;
MAP3K1	1036, 1147	BRCA	0.0109246	0.1	1	11	1	TRUE	FALSE
TP53	241, 255	COAD	0.0109652	0.1	9	0	0	TRUE	FALSE
SV2A	any non-synonymous	UCEC	0.0113314	0.1	11	2	3	TRUE	FALSE
ATM	any non-synonymous	STAD	0.0117241	0.1	23	8	5	TRUE	FALSE
EP300	any non-synonymous	CESC	0.0123609	0.1	13	11	1	TRUE	FALSE
CHD4	945, 1016	UCEC	0.0124411	0.1	7	0	0	FALSE	TRUE	729-1025, C4G4W5.1;
MARK3	any non-synonymous	UCEC	0.0125933	0.1	7	7	4	TRUE	FALSE
GATA3	429, 443	BRCA	0.0129263	0.1	0	15	0	TRUE	FALSE
MKI67	any non-synonymous	UCEC	0.0133386	0.1	45	17	21	TRUE	FALSE
GABBR1	any non-synonymous	UCEC	0.0133942	0.1	11	0	3	TRUE	FALSE
DIAPH3	any non-synonymous	UCEC	0.0136304	0.1	22	3	9	TRUE	FALSE
PPP2R1A	any non-synonymous	UCEC	0.014146	0.1	28	0	3	FALSE	TRUE
ZNF721	any non-synonymous	UCEC	0.0141665	0.1	24	2	5	TRUE	FALSE
VARS	any non-synonymous	UCEC	0.0143233	0.1	6	0	2	TRUE	FALSE
MYH10	81, 175	UCEC	0.0145739	0.1	6	0	1	TRUE	FALSE	87-771, Myosin_head;
TP53	203, 216	HNSC	0.0148456	0.1	14	6	0	TRUE	FALSE
MYH10	any non-synonymous	STAD	0.0151247	0.25	22	2	6	TRUE	FALSE
FBXW7	any non-synonymous	UCEC	0.0152567	0.25	35	9	1	TRUE	FALSE
SEMA5B	any non-synonymous	STAD	0.0165413	0.25	12	1	4	TRUE	FALSE
APC	2166, 2253	UCEC	0.0165914	0.25	3	5	0	FALSE	TRUE
CIC	1221, 1432	LGG	0.0167877	0.25	0	5	0	TRUE	FALSE
VHL	any non-synonymous	KIRC	0.0171905	0.25	103	109	7	TRUE	FALSE
TP53	164, 187	LGG	0.0173966	0.25	16	3	0	TRUE	FALSE
FBXW7	any non-synonymous	COAD	0.0174028	0.25	26	7	2	FALSE	TRUE
ROBO3	195, 509	UCEC	0.0175635	0.25	9	0	1	TRUE	FALSE	347-441, I-set;
CREBBP	any non-synonymous	COAD	0.0180075	0.25	16	5	6	TRUE	FALSE
MSH6	any non-synonymous	UCEC	0.0185425	0.25	21	10	4	TRUE	FALSE
PPIG	any non-synonymous	UCEC	0.0186387	0.25	15	8	5	TRUE	FALSE
ZFHX3	962, 1138	UCEC	0.0188777	0.25	4	1	0	TRUE	FALSE
TSC2	115, 312	UCEC	0.0196395	0.25	5	1	0	FALSE	TRUE	51-472, DUF3384;
TP53	231, 240	LGG	0.0201334	0.25	7	1	0	TRUE	FALSE
CDC27	any non-synonymous	SKCM	0.0204197	0.25	10	3	3	TRUE	FALSE
KIF20B	42, 158	UCEC	0.0209079	0.25	9	1	2	TRUE	FALSE	64-479, E9BBD3.1;
KIF20B	955, 1043	UCEC	0.0223419	0.25	6	1	0	TRUE	FALSE
BAP1	163, 324	KIRC	0.0232441	0.25	3	4	1	TRUE	FALSE
MLL4	any non-synonymous	UCEC	0.0236515	0.25	42	9	12	TRUE	FALSE
MUC5B	any non-synonymous	STAD	0.0238585	0.25	28	3	23	TRUE	FALSE
C9orf102	367, 557	UCEC	0.0241527	0.25	7	0	0	FALSE	TRUE	137-473, G4T6D8.1;
SLC4A3	any non-synonymous	STAD	0.0243649	0.25	6	4	6	TRUE	FALSE
ZNF781	any non-synonymous	UCEC	0.0244565	0.25	9	4	1	TRUE	FALSE
TPP2	any non-synonymous	UCEC	0.0244639	0.25	10	6	7	TRUE	FALSE
RASGRF2	any non-synonymous	LUAD	0.0252292	0.25	12	1	3	TRUE	FALSE
TPO	any non-synonymous	STAD	0.0253506	0.25	14	1	8	TRUE	FALSE
PCDHA3	any non-synonymous	STAD	0.025607	0.25	16	0	11	TRUE	FALSE
TP53	any non-synonymous	ACC	0.02575	0.25	5	7	1	TRUE	FALSE
SHOX2	111, 178	UCEC	0.0259275	0.25	3	2	1	FALSE	TRUE	141-197, Homeobox;
CCDC6	any non-synonymous	UCEC	0.0263687	0.25	2	4	1	TRUE	FALSE
GNPTAB	any non-synonymous	UCEC	0.0265635	0.25	21	6	4	TRUE	FALSE
APC	any non-synonymous	UCEC	0.0268617	0.25	41	19	10	FALSE	TRUE
MYH9	any non-synonymous	UCEC	0.0272564	0.25	20	2	5	TRUE	FALSE
MED15	any non-synonymous	UCEC	0.0273452	0.25	7	2	3	TRUE	FALSE
TSC1	any non-synonymous	LUAD	0.0275122	0.25	7	1	1	TRUE	FALSE
EGFR	any non-synonymous	LUAD	0.028293	0.25	24	9	6	TRUE	FALSE
POLE	279, 297	UCEC	0.0291392	0.25	9	0	0	TRUE	FALSE
ZNF334	any non-synonymous	UCEC	0.0319888	0.25	26	0	1	TRUE	FALSE
JAKMIP2	250, 334	UCEC	0.0322041	0.25	5	0	0	TRUE	FALSE
CYP11B1	any non-synonymous	LUAD	0.0326094	0.25	9	1	5	TRUE	FALSE
L1TD1	any non-synonymous	UCEC	0.0326514	0.25	21	6	3	TRUE	FALSE
SF3B1	576, 781	SKCM	0.0332143	0.25	5	0	1	TRUE	FALSE
PIK3CA	539, 547	STAD	0.0335576	0.25	20	0	0	TRUE	FALSE
GARS	31, 42	ACC	0.0338273	0.25	19	0	4	FALSE	FALSE
GARS	any non-synonymous	ACC	0.0338273	0.25	20	0	4	FALSE	FALSE
SLC4A3	any non-synonymous	UCEC	0.0339933	0.25	17	0	4	TRUE	FALSE
TP53	241, 255	GBM	0.0355961	0.25	9	0	0	TRUE	FALSE
GIGYF2	54, 140	UCEC	0.0357171	0.25	2	3	0	FALSE	TRUE
PIK3CA	1043, 1049	COAD	0.036393	0.25	6	0	0	FALSE	TRUE
EP300	any non-synonymous	HNSC	0.0364494	0.25	18	5	1	TRUE	FALSE
MSH6	1196, 1334	UCEC	0.0372231	0.25	3	3	1	TRUE	FALSE	1074-1326, MutS_V;
BAP1	1, 60	KIRC	0.037266	0.25	8	3	0	TRUE	FALSE
TP53	33, 39	BRCA	0.0389723	0.25	5	0	0	TRUE	FALSE
ECM1	any non-synonymous	UCEC	0.0390124	0.25	6	0	4	TRUE	FALSE
C9orf102	any non-synonymous	UCEC	0.0395395	0.25	12	4	1	FALSE	TRUE
CDC27	any non-synonymous	COAD	0.0398771	0.25	9	2	2	TRUE	FALSE
ST6GALNAC5	any non-synonymous	SKCM	0.0407156	0.25	7	1	5	TRUE	FALSE
SYNGAP1	any non-synonymous	STAD	0.0414863	0.25	8	2	4	TRUE	FALSE
CSDE1	any non-synonymous	UCEC	0.0417629	0.25	27	5	3	TRUE	FALSE
CCDC105	any non-synonymous	UCEC	0.0419881	0.25	7	0	1	TRUE	FALSE
ALPK2	any non-synonymous	UCEC	0.0431075	0.25	25	9	7	TRUE	FALSE
FUBP1	1, 81	LGG	0.043233	0.25	1	5	1	TRUE	FALSE
ITGAL	any non-synonymous	UCEC	0.0433443	0.25	16	1	7	TRUE	FALSE
TP53	203, 216	COAD	0.0435476	0.25	2	5	0	TRUE	FALSE
GIGYF2	any non-synonymous	UCEC	0.0438918	0.25	19	9	6	FALSE	TRUE
ERBB3	40, 623	STAD	0.0446572	0.25	20	0	2	FALSE	TRUE
DYM	any non-synonymous	UCEC	0.0448897	0.25	9	4	2	TRUE	FALSE
PHF14	617, 829	UCEC	0.0450224	0.25	5	0	0	FALSE	TRUE
CAB39L	any non-synonymous	UCEC	0.045227	0.25	7	0	1	TRUE	FALSE
RUNX1	any non-synonymous	BRCA	0.0457736	0.25	10	18	2	TRUE	FALSE
GPRIN2	any non-synonymous	SKCM	0.045977	0.25	25	0	9	TRUE	FALSE
CTCF	any non-synonymous	BRCA	0.0462308	0.25	10	5	3	TRUE	FALSE
CCKAR	any non-synonymous	SKCM	0.0464312	0.25	10	0	11	TRUE	FALSE
MAP3K1	1311, 1473	BRCA	0.0465385	0.25	5	6	1	TRUE	FALSE	1243-1508, Pkinase;
PCDHGB1	any non-synonymous	UCEC	0.0466124	0.25	17	1	14	TRUE	FALSE
TSC1	any non-synonymous	UCEC	0.0467044	0.25	11	0	3	TRUE	FALSE
ATM	any non-synonymous	UCEC	0.0470214	0.25	38	16	9	TRUE	FALSE
PSMC4	any non-synonymous	UCEC	0.0471703	0.25	11	0	1	TRUE	FALSE
TP53	any non-synonymous	CESC	0.0473893	0.25	11	1	3	TRUE	FALSE
TP53	121, 127	LGG	0.0478168	0.25	3	2	0	TRUE	FALSE
ZNF471	any non-synonymous	UCEC	0.0490121	0.25	15	5	1	TRUE	FALSE
PARG	507, 900	UCEC	0.0490328	0.25	7	2	1	FALSE	FALSE	577-912, PARG_cat;
PARG	any non-synonymous	UCEC	0.0490328	0.25	7	2	2	FALSE	FALSE
EMR1	any non-synonymous	SKCM	0.0493308	0.25	30	0	22	TRUE	FALSE
PBRM1	208, 298	KIRC	0.0500179	0.25	1	10	0	TRUE	FALSE	186-275, B4IDI6.1;
NOTCH1	412, 513	LGG	0.050473	0.25	8	2	0	TRUE	FALSE
MYH9	any non-synonymous	STAD	0.0512184	0.25	21	1	6	TRUE	FALSE
MEN1	any non-synonymous	UCEC	0.0519796	0.25	9	0	1	TRUE	FALSE
ERBB2	any non-synonymous	CESC	0.0519997	0.25	11	0	1	TRUE	FALSE
HLA-A	23, 114	CESC	0.0522549	0.25	1	8	0	FALSE	TRUE	25-203, MHC_I;
DNAH12	any non-synonymous	UCEC	0.0542017	0.25	41	9	5	TRUE	FALSE
EGFR	any non-synonymous	GBM	0.0548316	0.25	84	4	7	TRUE	FALSE
EGFR	288, 291	GBM	0.0549108	0.25	20	0	0	TRUE	FALSE	177-338, E9IDZ2.1;
ARID1A	2232, 2275	UCEC	0.054991	0.25	2	7	1	TRUE	FALSE
RASIP1	any non-synonymous	ACC	0.0557051	0.25	6	0	1	TRUE	FALSE
TP53	121, 127	BRCA	0.0559215	0.25	3	2	1	TRUE	FALSE
FLT3	any non-synonymous	SKCM	0.0562266	0.25	27	7	5	TRUE	FALSE
CDKN2A	42, 58	SKCM	0.0575388	0.25	2	6	0	FALSE	TRUE
RUNX1	80, 112	BRCA	0.0578664	0.25	3	9	0	TRUE	FALSE
MAP3K1	670, 795	BRCA	0.0580195	0.25	2	11	0	TRUE	FALSE
NFIL3	any non-synonymous	UCEC	0.058841	0.25	12	0	5	TRUE	FALSE
ZNF628	146, 292	ACC	0.0589001	0.25	8	0	0	FALSE	FALSE
ZNF628	any non-synonymous	ACC	0.0589001	0.25	8	0	1	FALSE	FALSE
CAB39L	60, 214	UCEC	0.0593335	0.25	6	0	1	TRUE	FALSE	4-334, Mo25;
EP300	1389, 1409	CESC	0.0606279	0.25	5	0	0	TRUE	FALSE
DNAH12	22, 504	UCEC	0.0609213	0.25	10	2	1	TRUE	FALSE
SV2A	any non-synonymous	STAD	0.0611037	0.25	9	1	2	TRUE	FALSE
DIAPH3	629, 735	UCEC	0.0624293	0.25	4	2	0	TRUE	FALSE	636-1009, FH2;
STK11	any non-synonymous	CESC	0.0633197	0.25	7	1	2	TRUE	FALSE
PLCG1	184, 375	STAD	0.0644445	0.25	6	0	0	TRUE	FALSE	245-318, EF-hand_like;
TP53	266, 279	LIHC	0.0657104	0.25	5	1	0	TRUE	FALSE
APC	any non-synonymous	COAD	0.0664706	0.25	23	140	4	TRUE	FALSE
SETD2	2257, 2511	KIRC	0.0665267	0.25	2	4	1	TRUE	FALSE
AHNAK2	any non-synonymous	SKCM	0.067311	0.25	69	4	46	TRUE	FALSE
INPP4B	215, 285	UCEC	0.068357	0.25	2	4	0	FALSE	TRUE
FAT1	3597, 3707	UCEC	0.0690861	0.25	3	3	1	TRUE	FALSE
PIK3CA	539, 547	LUSC	0.069596	0.25	14	0	0	FALSE	TRUE

## Sheet: T6B_oncodriveclust_global_gexp
gene	cluster	cancer	global gexp association pval	false discovery rate	missense mutations	nonsense mutations	silent mutations	non-synonymous less than cluster(s)	cluster(s) less than non-synonymous
BRAF	597, 603	THCA	8.47884e-82	0.01	235	0	0	FALSE	TRUE
TP53	186, 225	BRCA	8.85543e-25	0.01	38	23	0	TRUE	FALSE
CTNNB1	31, 45	UCEC	1.18437e-24	0.01	67	0	0	FALSE	TRUE
TP53	258, 294	LGG	1.799e-14	0.01	62	6	1	TRUE	FALSE
CTNNB1	31, 45	LIHC	4.18939e-14	0.01	35	2	0	FALSE	TRUE
BRAF	597, 603	SKCM	8.11821e-14	0.01	106	0	1	FALSE	TRUE
PIK3CA	538, 547	BRCA	6.10891e-13	0.01	121	0	0	TRUE	FALSE
TP53	168, 186	BRCA	9.27426e-11	0.01	33	13	0	TRUE	FALSE
TP53	258, 294	BRCA	2.45529e-09	0.01	45	8	2	TRUE	FALSE
TP53	85, 138	BRCA	2.78426e-09	0.01	21	21	2	TRUE	FALSE
CIC	1512, 1515	LGG	1.27919e-07	0.01	8	0	0	TRUE	FALSE
TP53	258, 294	UCEC	3.47889e-07	0.01	15	2	0	TRUE	FALSE
NOTCH1	54, 58	LGG	9.30628e-07	0.01	0	7	0	TRUE	FALSE
PIK3CA	1037, 1052	BRCA	9.79601e-07	0.01	149	0	0	TRUE	FALSE
TP53	186, 225	LGG	1.31935e-06	0.01	26	5	0	TRUE	FALSE
GATA3	399, 412	BRCA	5.71215e-06	0.01	1	19	0	TRUE	FALSE
FGFR3	248, 249	BLCA	1.39845e-05	0.01	11	0	0	TRUE	FALSE
TP53	146, 168	LGG	1.47887e-05	0.01	12	2	0	TRUE	FALSE
TP53	26, 80	BRCA	1.58129e-05	0.01	6	6	0	TRUE	FALSE
TP53	334, 354	BRCA	2.26588e-05	0.01	3	8	0	TRUE	FALSE
CIC	210, 215	LGG	2.9094e-05	0.01	7	0	0	TRUE	FALSE
TP53	186, 225	UCEC	3.54054e-05	0.01	18	0	0	TRUE	FALSE
PTEN	16, 56	UCEC	9.34253e-05	0.01	6	16	0	TRUE	FALSE
PTEN	108, 132	UCEC	0.000100303	0.01	60	10	0	TRUE	FALSE
PGM5	98, 98	STAD	0.000514715	0.01	18	0	0	FALSE	TRUE
CIC	198, 205	LGG	0.000624246	0.01	5	0	0	TRUE	FALSE
ZBTB20	692, 696	STAD	0.000658053	0.01	0	8	0	TRUE	FALSE
CIC	228, 238	LGG	0.000829806	0.01	4	1	0	TRUE	FALSE
FBXW7	465, 465	COAD	0.000914473	0.05	8	0	0	FALSE	TRUE
GATA3	325, 334	BRCA	0.00109099	0.05	1	15	0	TRUE	FALSE
TP53	228, 257	GBM	0.00130254	0.05	15	0	0	TRUE	FALSE
PPP2R1A	179, 183	UCEC	0.0013856	0.05	10	0	0	FALSE	TRUE
CDH1	728, 738	BRCA	0.00152307	0.05	1	4	0	TRUE	FALSE
TP53	168, 186	UCEC	0.00320741	0.05	6	2	0	TRUE	FALSE
GATA3	423, 437	BRCA	0.00337736	0.05	0	15	0	TRUE	FALSE
TP53	228, 257	LGG	0.0035129	0.05	18	1	0	TRUE	FALSE
TP53	228, 257	BRCA	0.00360808	0.05	15	7	0	TRUE	FALSE
TP53	85, 138	HNSC	0.00390697	0.05	12	14	2	TRUE	FALSE
TP53	85, 138	LGG	0.00410702	0.05	10	3	1	TRUE	FALSE
BAP1	74, 78	KIRC	0.00440546	0.05	3	2	0	TRUE	FALSE
KRAS	12, 13	UCEC	0.00495319	0.05	45	0	1	TRUE	FALSE
SKI	62, 62	KIRP	0.00551374	0.05	6	0	0	FALSE	FALSE
IDH1	132, 132	SKCM	0.00735075	0.05	12	0	0	TRUE	FALSE
PIK3R1	557, 582	UCEC	0.00792343	0.05	8	21	0	FALSE	TRUE
TP53	168, 186	READ	0.00810481	0.05	6	0	0	FALSE	TRUE
TP53	228, 257	COAD	0.010446	0.1	11	1	0	TRUE	FALSE
TP53	146, 168	STAD	0.0120676	0.1	2	4	0	TRUE	FALSE
TP53	186, 225	HNSC	0.013125	0.1	26	15	1	TRUE	FALSE
CDH1	195, 204	BRCA	0.0134832	0.1	2	6	0	TRUE	FALSE
PTEN	151, 169	UCEC	0.0135077	0.1	5	3	1	TRUE	FALSE
TP53	168, 186	LGG	0.0173966	0.1	16	3	0	TRUE	FALSE
TP53	228, 257	UCEC	0.0212451	0.25	13	3	0	TRUE	FALSE
TP53	26, 80	LUAD	0.0228174	0.25	2	9	0	TRUE	FALSE
TP53	258, 294	LIHC	0.0255475	0.25	7	3	0	TRUE	FALSE
PTEN	240, 272	UCEC	0.0266503	0.25	3	8	1	TRUE	FALSE
EGFR	858, 861	LUAD	0.0319328	0.25	11	0	0	TRUE	FALSE
SF3B1	622, 626	SKCM	0.0332143	0.25	5	0	0	TRUE	FALSE
PIK3CA	538, 547	STAD	0.0335576	0.25	20	0	0	TRUE	FALSE
GARS	41, 42	ACC	0.0338273	0.25	19	0	0	FALSE	FALSE
ZNF628	234, 235	ACC	0.0356857	0.25	6	0	0	FALSE	TRUE
PLEC	1386, 1386	ACC	0.0379086	0.25	8	0	0	FALSE	TRUE
TP53	228, 257	LIHC	0.0450109	0.25	10	2	0	TRUE	FALSE
TP53	186, 225	READ	0.0466916	0.25	2	3	0	FALSE	TRUE
CDH1	335, 340	BRCA	0.0483536	0.25	0	5	1	TRUE	FALSE
POLE	286, 289	UCEC	0.0511531	0.25	8	0	0	TRUE	FALSE
CDH1	18, 23	BRCA	0.0535166	0.25	0	8	0	TRUE	FALSE
EGFR	288, 289	GBM	0.0549108	0.25	20	0	0	TRUE	FALSE
ARID1A	2232, 2239	UCEC	0.0583773	0.25	2	3	1	TRUE	FALSE
TP53	258, 294	GBM	0.058643	0.25	16	2	0	TRUE	FALSE
TP53	228, 257	LUAD	0.0593013	0.25	17	1	0	TRUE	FALSE
EP300	1397, 1399	CESC	0.0606279	0.25	5	0	0	TRUE	FALSE
TP53	146, 168	LUAD	0.0610337	0.25	10	2	0	TRUE	FALSE
PIK3CA	538, 547	LUSC	0.069596	0.25	15	0	0	FALSE	TRUE
TP53	186, 225	LIHC	0.0751785	0.25	10	3	0	TRUE	FALSE
TP53	228, 257	LUSC	0.078596	0.25	18	1	0	TRUE	FALSE
PIK3CA	538, 547	UCEC	0.0805684	0.25	38	0	0	FALSE	TRUE
VHL	143, 147	KIRC	0.0807228	0.25	0	8	0	TRUE	FALSE

## Sheet: T6C_pfam_global_gexp
gene	cluster	cancer	global gexp association pval	false discovery rate	missense mutations	nonsense mutations	silent mutations	non-synonymous less than cluster(s)	cluster(s) less than non-synonymous
BRAF	457, 714	THCA	8.47884e-82	0.01	235	0	1	FALSE	TRUE
TP53	95, 289	BRCA	4.39049e-81	0.01	165	71	4	TRUE	FALSE
TP53	95, 289	LGG	1.74752e-49	0.01	147	21	2	TRUE	FALSE
TP53	95, 289	UCEC	1.03755e-31	0.01	56	10	1	TRUE	FALSE
CIC	200, 268	LGG	6.31432e-16	0.01	17	1	0	TRUE	FALSE
BRAF	457, 714	SKCM	3.38969e-11	0.01	118	2	1	FALSE	TRUE
PIK3CA	519, 704	BRCA	3.81488e-11	0.01	125	0	1	TRUE	FALSE
PTEN	45, 171	UCEC	9.12856e-08	0.01	85	42	1	TRUE	FALSE
TP53	95, 289	HNSC	1.96511e-07	0.01	139	48	3	TRUE	FALSE
BAP1	4, 217	KIRC	6.31353e-07	0.01	12	7	0	TRUE	FALSE
TP53	95, 289	LAML	1.36557e-06	0.01	9	2	1	TRUE	FALSE
TP53	95, 289	GBM	1.58172e-06	0.01	75	7	1	TRUE	FALSE
TP53	95, 289	LIHC	3.11175e-06	0.01	40	13	1	TRUE	FALSE
CDH1	267, 366	BRCA	3.27965e-06	0.01	4	12	1	TRUE	FALSE
TP53	318, 359	BRCA	7.30977e-06	0.01	3	12	0	TRUE	FALSE
CDH1	732, 879	BRCA	5.56948e-05	0.01	3	11	0	TRUE	FALSE
CBFB	1, 177	BRCA	0.000140758	0.01	13	10	1	FALSE	FALSE
TP53	95, 289	LUAD	0.000205231	0.01	74	20	2	TRUE	FALSE
FBXW7	451, 487	COAD	0.000441418	0.01	9	2	0	FALSE	TRUE
DNAH12	2377, 3089	UCEC	0.000485212	0.01	11	1	2	FALSE	TRUE
PGM5	19, 163	STAD	0.000514715	0.01	19	2	1	FALSE	TRUE
JUB	403, 459	HNSC	0.000524574	0.01	4	1	0	FALSE	TRUE
C9orf102	137, 473	UCEC	0.000699757	0.05	7	2	0	FALSE	TRUE
RB1	373, 573	LIHC	0.000763525	0.05	0	5	1	FALSE	TRUE
KRAS	5, 165	UCEC	0.00103769	0.05	51	0	2	FALSE	TRUE
PPP2R1A	166, 196	UCEC	0.0013856	0.05	11	0	0	FALSE	TRUE
IDH1	9, 401	SKCM	0.00141044	0.05	14	0	2	FALSE	TRUE
SBNO1	872, 1148	UCEC	0.00253957	0.05	5	1	0	TRUE	FALSE
TP53	95, 289	COAD	0.00293695	0.05	47	16	1	TRUE	FALSE
GPR128	431, 716	SKCM	0.00308378	0.05	6	0	3	FALSE	TRUE
TP53	95, 289	BLCA	0.003354	0.05	54	11	0	FALSE	TRUE
PTEN	188, 349	UCEC	0.00471376	0.05	10	73	4	TRUE	FALSE
TGFBR2	244, 538	COAD	0.00514229	0.05	5	1	1	TRUE	FALSE
MAP3K1	1243, 1508	BRCA	0.00602958	0.1	6	12	1	TRUE	FALSE
POLE	86, 427	COAD	0.00633957	0.1	6	0	0	TRUE	FALSE
CYP11B1	42, 498	LUAD	0.00684691	0.1	8	1	4	FALSE	TRUE
TP53	95, 289	STAD	0.00710701	0.1	62	25	1	TRUE	FALSE
MYH10	1073, 1930	STAD	0.00849771	0.1	14	2	1	FALSE	TRUE
GATA3	317, 351	BRCA	0.00914429	0.1	1	22	0	TRUE	FALSE
RB1	105, 229	UCEC	0.0103306	0.1	2	3	0	TRUE	FALSE
CDH1	159, 253	BRCA	0.0107254	0.1	7	14	0	TRUE	FALSE
ERBB2	720, 976	BRCA	0.0107929	0.1	14	1	0	FALSE	TRUE
POLE	86, 427	UCEC	0.0114029	0.1	19	0	0	TRUE	FALSE
MYH10	1073, 1930	UCEC	0.0138092	0.1	8	2	2	TRUE	FALSE
TSC2	51, 472	UCEC	0.0146332	0.25	6	1	0	FALSE	TRUE
TSC1	2, 719	UCEC	0.0146896	0.25	8	0	2	FALSE	TRUE
SEMA3C	54, 495	BRCA	0.015646	0.25	4	2	2	TRUE	FALSE
TP53	318, 359	LUSC	0.0158849	0.25	4	2	0	TRUE	FALSE
ITGAL	612, 1016	SKCM	0.0181449	0.25	5	3	5	FALSE	TRUE
TP53	95, 289	ACC	0.0218802	0.25	4	4	1	FALSE	TRUE
NOTCH1	452, 491	LGG	0.022509	0.25	3	2	0	TRUE	FALSE
PIK3CA	519, 704	STAD	0.0230947	0.25	21	0	0	TRUE	FALSE
MED23	1, 1307	BRCA	0.0237676	0.25	6	7	2	FALSE	TRUE
VHL	58, 213	KIRC	0.0244358	0.25	94	107	7	TRUE	FALSE
SEMA5B	126, 537	STAD	0.0251172	0.25	6	0	1	TRUE	FALSE
MSH6	1074, 1326	UCEC	0.0257229	0.25	4	3	3	TRUE	FALSE
CCDC6	2, 341	UCEC	0.0263687	0.25	2	4	1	FALSE	FALSE
FGFR2	481, 757	UCEC	0.0272252	0.25	12	2	1	FALSE	TRUE
MED15	17, 788	UCEC	0.0273452	0.25	7	2	3	FALSE	FALSE
PDGFRA	593, 950	UCEC	0.0273612	0.25	9	1	0	TRUE	FALSE
TSC1	2, 719	LUAD	0.0275122	0.25	5	1	1	FALSE	FALSE
DIAPH3	636, 1009	UCEC	0.0303258	0.25	9	2	2	TRUE	FALSE
DLC1	1323, 1522	UCEC	0.0303837	0.25	5	0	1	FALSE	TRUE
ERCC2	72, 256	BLCA	0.0325615	0.25	7	0	1	FALSE	TRUE
TP53	318, 359	LUAD	0.0344002	0.25	2	4	0	TRUE	FALSE
RASGRF2	247, 428	LUAD	0.0348442	0.25	4	1	1	TRUE	FALSE
FBXW7	451, 487	STAD	0.0353128	0.25	10	0	0	TRUE	FALSE
PDILT	180, 365	SKCM	0.0385562	0.25	6	1	5	FALSE	TRUE
ECM1	1, 540	UCEC	0.0390124	0.25	6	0	4	FALSE	FALSE
CPS1	1088, 1291	SKCM	0.0405957	0.25	6	0	0	FALSE	TRUE
C9orf102	137, 473	STAD	0.0418152	0.25	7	0	1	TRUE	FALSE
PTEN	188, 349	STAD	0.0419636	0.25	0	5	1	TRUE	FALSE
CCDC105	121, 471	UCEC	0.0419881	0.25	7	0	1	FALSE	FALSE
IRF2	5, 114	STAD	0.0427087	0.25	8	4	0	FALSE	TRUE
EGFR	177, 338	GBM	0.043569	0.25	38	0	4	FALSE	TRUE
EMR1	599, 840	SKCM	0.0438624	0.25	5	0	7	FALSE	TRUE
DYM	1, 646	UCEC	0.0448897	0.25	9	4	2	FALSE	FALSE
CAB39L	4, 334	UCEC	0.045227	0.25	7	0	1	FALSE	FALSE
RXRA	251, 442	BLCA	0.0454194	0.25	8	0	1	FALSE	TRUE
CDH1	27, 116	BRCA	0.0473837	0.25	0	9	0	TRUE	FALSE
VARS	308, 939	UCEC	0.0482891	0.25	5	0	2	TRUE	FALSE
SHOX2	141, 197	UCEC	0.0515916	0.25	2	3	1	FALSE	TRUE
MEN1	1, 615	UCEC	0.0519796	0.25	9	0	1	FALSE	FALSE
RUNX1	48, 182	BRCA	0.0527925	0.25	6	11	0	TRUE	FALSE
MET	52, 500	UCEC	0.0541328	0.25	11	0	4	FALSE	TRUE
ARID1A	1975, 2231	BLCA	0.0541474	0.25	3	3	0	FALSE	TRUE
TBX3	104, 306	BRCA	0.0544847	0.25	4	12	1	FALSE	TRUE
KIT	589, 924	UCEC	0.0552216	0.25	10	1	1	TRUE	FALSE
HLA-A	25, 203	CESC	0.0554141	0.25	1	7	0	FALSE	TRUE
MYH9	1066, 1923	STAD	0.0557766	0.25	12	0	3	TRUE	FALSE
CDH1	491, 585	BRCA	0.0614852	0.25	0	10	0	TRUE	FALSE
APC	1369, 1394	COAD	0.0681229	0.25	0	5	1	TRUE	FALSE

## Sheet: T6D_muts_no_clusts_global_gexp
cancer	gene	pval
BRCA	GATA3	0.0163417
STAD	PIK3CA	0.112189
UCEC	TP53	0.00167987
BRCA	PIK3CA	9.02e-06
HNSC	NSD1	0.169511
KIRC	SETD2	0.0143968
COAD	FBXW7	0.0295189
UCEC	GPR128	2.79e-05
UCEC	ZFHX3	0.00191546
KIRC	PBRM1	0.00127068
UCEC	PIK3R1	0.00211081
UCEC	PTEN	0.0119238
UCEC	PPP2R1A	5.62e-07
UCEC	TIGD4	0.000191744
SKCM	MLL3	0.297715
BRCA	TP53	0.561711
UCEC	ZNF721	4.92e-06
KIRC	BAP1	0.359195
HNSC	TP53	0.0139364
UCEC	CTNNB1	6.09e-06
UCEC	ARID1A	0.0893105
LUAD	TP53	0.0157508
BRCA	CDH1	0.99449
BRCA	MAP3K1	0.0110068
STAD	ARID1A	0.0194674
HNSC	NOTCH1	0.00027486
STAD	TP53	0.00414541
BLCA	FGFR3	0.00240052
UCEC	POLE	0.00103566
UCEC	MYH10	0.000174106
UCEC	PTPRF	0.000733378

## Sheet: T7A_m2c_pathway_gexp
gene	cluster	cancer	pathway	pathway gexp association pval	false discovery rate	missense mutations	nonsense mutations	silent mutations	non-synonymous less than cluster(s)	cluster(s) less than non-synonymous	overlapping domains	pathway size	count of significantly increased gene expression features	count of significantly decreased gene expression features	list of significantly increased gene expression features	list of significantly decreased gene expression features
TP53	any non-synonymous	BRCA	VALIDATED TARGETS OF C-MYC TRANSCRIPTIONAL ACTIVATION	5.62862e-158	0.01	176	103	5	TRUE	FALSE		75	0	0
TP53	any non-synonymous	BRCA	REGULATION OF RETINOBLASTOMA PROTEIN	2.9109e-150	0.01	176	103	5	TRUE	FALSE		59	0	0
TP53	any non-synonymous	BRCA	MTOR SIGNALING PATHWAY	1.16652e-139	0.01	176	103	5	TRUE	FALSE		68	0	0
TP53	any non-synonymous	BRCA	DIRECT P53 EFFECTORS	1.9705e-136	0.01	176	103	5	TRUE	FALSE		135	0	0
TP53	any non-synonymous	BRCA	P73 TRANSCRIPTION FACTOR NETWORK	4.51579e-131	0.01	176	103	5	TRUE	FALSE		76	0	0
BRAF	600, 601	THCA	INSULIN-MEDIATED GLUCOSE TRANSPORT	1.89555e-06	0.01	235	0	0	FALSE	TRUE		10	5	0	SFN, 1.15279715975e-14; TBC1D4, 4.02935457853e-13; SLC2A4, 8.82881775374e-12; GYS1, 2.61086280661e-08; TRIP10, 1.89555288896e-06;
TP53	any non-synonymous	BRCA	FOXM1 TRANSCRIPTION FACTOR NETWORK	2.23206e-128	0.01	176	103	5	TRUE	FALSE		40	0	0
BRAF	any non-synonymous	THCA	INSULIN-MEDIATED GLUCOSE TRANSPORT	1.89555e-06	0.01	235	2	1	FALSE	TRUE		10	5	0	SFN, 1.15279715975e-14; TBC1D4, 4.02935457853e-13; SLC2A4, 8.82881775374e-12; GYS1, 2.61086280661e-08; TRIP10, 1.89555288896e-06;
TP53	any non-synonymous	BRCA	LKB1 SIGNALING EVENTS	2.46298e-125	0.01	176	103	5	TRUE	FALSE		46	0	0
TP53	any non-synonymous	BRCA	AURORA A SIGNALING	2.72195e-121	0.01	176	103	5	TRUE	FALSE		30	0	0
BRAF	600, 601	THCA	COREGULATION OF ANDROGEN RECEPTOR ACTIVITY	0.000517242	0.01	235	0	0	FALSE	TRUE		19	12	0	FKBP4, 1.13657700232e-12; UBE2I, 5.9955715153e-12; TGIF1, 4.79433984395e-11; PRDX1, 3.5298869218e-09; PTK2B, 4.70330680543e-09; SVIL, 1.37119242427e-08; CCND3, 2.96687899828e-06; CCND1, 8.64451888313e-05; TGFB1I1, 0.000152247967685; CDK6, 0.000208619195295; LATS2, 0.00023009920867; UBA3, 0.000517241848897;
BRAF	600, 601	THCA	FOXA1 TRANSCRIPTION FACTOR NETWORK	1.79083e-08	0.01	235	0	0	FALSE	TRUE		9	3	1	SERPINA1, 6.16129481609e-21; NFIA, 1.18463655504e-11; FOXA3, 1.79083276579e-08;	FOXA2, 8.32502331902e-09;
BRAF	any non-synonymous	THCA	COREGULATION OF ANDROGEN RECEPTOR ACTIVITY	0.000517242	0.01	235	2	1	FALSE	TRUE		19	12	0	FKBP4, 1.13657700232e-12; UBE2I, 5.9955715153e-12; TGIF1, 4.79433984395e-11; PRDX1, 3.5298869218e-09; PTK2B, 4.70330680543e-09; SVIL, 1.37119242427e-08; CCND3, 2.96687899828e-06; CCND1, 8.64451888313e-05; TGFB1I1, 0.000152247967685; CDK6, 0.000208619195295; LATS2, 0.00023009920867; UBA3, 0.000517241848897;
TP53	any non-synonymous	BRCA	SIGNALING EVENTS MEDIATED BY HDAC CLASS I	7.86386e-116	0.01	176	103	5	TRUE	FALSE		63	0	0
TP53	any non-synonymous	BRCA	E2F TRANSCRIPTION FACTOR NETWORK	5.79898e-114	0.01	176	103	5	TRUE	FALSE		70	0	0
BRAF	any non-synonymous	THCA	FOXA1 TRANSCRIPTION FACTOR NETWORK	1.79083e-08	0.01	235	2	1	FALSE	TRUE		9	3	1	SERPINA1, 6.16129481609e-21; NFIA, 1.18463655504e-11; FOXA3, 1.79083276579e-08;	FOXA2, 8.32502331902e-09;
TP53	any non-synonymous	BRCA	REGULATION OF TELOMERASE	1.76652e-111	0.01	176	103	5	TRUE	FALSE		64	0	0
BRAF	600, 601	THCA	S1P2 PATHWAY	3.00394e-05	0.01	235	0	0	FALSE	TRUE		10	8	0	GNA14, 2.80583691497e-20; IRS1, 5.36435633963e-15; ELK1, 1.73299466099e-10; CDH5, 9.59124717471e-10; GNAZ, 1.5245217342e-08; GNA15, 3.56327741646e-08; S1PR2, 2.1695300081e-06; GNAI2, 3.00394211669e-05;
TP53	any non-synonymous	BRCA	VALIDATED TRANSCRIPTIONAL TARGETS OF TAP63 ISOFORMS	3.76332e-109	0.01	176	103	5	TRUE	FALSE		52	0	0
BRAF	any non-synonymous	THCA	S1P2 PATHWAY	3.00394e-05	0.01	235	2	1	FALSE	TRUE		10	8	0	GNA14, 2.80583691497e-20; IRS1, 5.36435633963e-15; ELK1, 1.73299466099e-10; CDH5, 9.59124717471e-10; GNAZ, 1.5245217342e-08; GNA15, 3.56327741646e-08; S1PR2, 2.1695300081e-06; GNAI2, 3.00394211669e-05;
TP53	any non-synonymous	BRCA	CERAMIDE SIGNALING PATHWAY	9.21212e-106	0.01	176	103	5	TRUE	FALSE		47	0	0
TP53	any non-synonymous	BRCA	SIGNALING EVENTS MEDIATED BY HDAC CLASS II	1.25989e-105	0.01	176	103	5	TRUE	FALSE		32	0	0
TP53	any non-synonymous	BRCA	PRESENILIN ACTION IN NOTCH AND WNT SIGNALING	8.57431e-103	0.01	176	103	5	TRUE	FALSE		44	0	0
TP53	any non-synonymous	BRCA	C-MYB TRANSCRIPTION FACTOR NETWORK	5.70538e-102	0.01	176	103	5	TRUE	FALSE		72	0	0
TP53	any non-synonymous	BRCA	HIF-1-ALPHA TRANSCRIPTION FACTOR NETWORK	1.10389e-100	0.01	176	103	5	TRUE	FALSE		59	0	0
BRAF	600, 601	THCA	VALIDATED TRANSCRIPTIONAL TARGETS OF DELTANP63 ISOFORMS	0.000789587	0.01	235	0	0	FALSE	TRUE		18	12	1	ITGA3, 8.66495693252e-21; PERP, 2.15570273793e-19; TCF7L1, 4.7261776448e-19; RUNX1, 1.49385718221e-16; SEC14L2, 5.23714443643e-15; SFN, 1.15279715975e-14; AXL, 5.50794338384e-14; HES1, 6.75323139778e-12; FOSL2, 4.06033643907e-09; TP63, 4.27383075751e-06; COL5A1, 0.000168596883019; NOTCH1, 0.00078958742165;	T, 2.05788909025e-08;
TP53	any non-synonymous	BRCA	P75(NTR)-MEDIATED SIGNALING	6.30947e-100	0.01	176	103	5	TRUE	FALSE		64	0	0
BRAF	any non-synonymous	THCA	VALIDATED TRANSCRIPTIONAL TARGETS OF DELTANP63 ISOFORMS	0.000789587	0.01	235	2	1	FALSE	TRUE		18	12	1	ITGA3, 8.66495693252e-21; PERP, 2.15570273793e-19; TCF7L1, 4.7261776448e-19; RUNX1, 1.49385718221e-16; SEC14L2, 5.23714443643e-15; SFN, 1.15279715975e-14; AXL, 5.50794338384e-14; HES1, 6.75323139778e-12; FOSL2, 4.06033643907e-09; TP63, 4.27383075751e-06; COL5A1, 0.000168596883019; NOTCH1, 0.00078958742165;	T, 2.05788909025e-08;
TP53	any non-synonymous	BRCA	CIRCADIAN RHYTHM PATHWAY	1.58594e-96	0.01	176	103	5	TRUE	FALSE		14	0	0
TP53	any non-synonymous	BRCA	SIGNALING MEDIATED BY P38-GAMMA AND P38-DELTA	5.60003e-96	0.01	176	103	5	TRUE	FALSE		10	0	0
BRAF	600, 601	THCA	SIGNALING EVENTS REGULATED BY RET TYROSINE KINASE	7.62114e-05	0.01	235	0	0	FALSE	TRUE		14	10	0	GRB7, 6.63840713809e-22; IRS1, 5.36435633963e-15; IRS2, 7.5008857677e-12; PXN, 7.41448873369e-11; DOK6, 3.00020537288e-08; GRB10, 9.82254981495e-08; SHANK3, 8.9718836725e-07; PDLIM7, 5.36829609789e-06; SRC, 1.86623953988e-05; SHC1, 7.62113619067e-05;
TP53	any non-synonymous	BRCA	SIGNALING EVENTS MEDIATED BY PRL	2.9549e-95	0.01	176	103	5	TRUE	FALSE		22	0	0
TP53	any non-synonymous	BRCA	GLUCOCORTICOID RECEPTOR REGULATORY NETWORK	1.24534e-93	0.01	176	103	5	TRUE	FALSE		69	0	0
BRAF	600, 601	THCA	HIF-2-ALPHA TRANSCRIPTION FACTOR NETWORK	0.00052611	0.01	235	0	0	FALSE	TRUE		13	10	0	VEGFA, 1.18226964962e-11; SLC2A1, 2.86175771849e-11; KDR, 1.01699370771e-10; BHLHE40, 1.11276836167e-10; ELK1, 1.73299466099e-10; FXN, 4.19901901412e-10; MMP14, 9.88166227388e-08; EFNA1, 1.58422551044e-07; EPAS1, 2.04932517896e-06; EGLN2, 0.000526110127116;
TP53	any non-synonymous	BRCA	AURORA B SIGNALING	3.34765e-93	0.01	176	103	5	TRUE	FALSE		39	0	0
BRAF	any non-synonymous	THCA	SIGNALING EVENTS REGULATED BY RET TYROSINE KINASE	7.62114e-05	0.01	235	2	1	FALSE	TRUE		14	10	0	GRB7, 6.63840713809e-22; IRS1, 5.36435633963e-15; IRS2, 7.5008857677e-12; PXN, 7.41448873369e-11; DOK6, 3.00020537288e-08; GRB10, 9.82254981495e-08; SHANK3, 8.9718836725e-07; PDLIM7, 5.36829609789e-06; SRC, 1.86623953988e-05; SHC1, 7.62113619067e-05;
BRAF	any non-synonymous	THCA	HIF-2-ALPHA TRANSCRIPTION FACTOR NETWORK	0.00052611	0.01	235	2	1	FALSE	TRUE		13	10	0	VEGFA, 1.18226964962e-11; SLC2A1, 2.86175771849e-11; KDR, 1.01699370771e-10; BHLHE40, 1.11276836167e-10; ELK1, 1.73299466099e-10; FXN, 4.19901901412e-10; MMP14, 9.88166227388e-08; EFNA1, 1.58422551044e-07; EPAS1, 2.04932517896e-06; EGLN2, 0.000526110127116;
BRAF	600, 601	THCA	CLASS I PI3K SIGNALING EVENTS MEDIATED BY AKT	1.86624e-05	0.01	235	0	0	FALSE	TRUE		10	6	0	SFN, 1.15279715975e-14; AKT3, 3.10684023754e-13; TBC1D4, 4.02935457853e-13; SLC2A4, 8.82881775374e-12; BCL2L1, 2.09266008144e-11; SRC, 1.86623953988e-05;
TP53	any non-synonymous	BRCA	FOXA1 TRANSCRIPTION FACTOR NETWORK	4.98144e-87	0.01	176	103	5	TRUE	FALSE		34	0	0
BRAF	600, 601	THCA	IGF1 PATHWAY	7.62114e-05	0.01	235	0	0	FALSE	TRUE		11	6	0	IRS1, 5.36435633963e-15; IRS2, 7.5008857677e-12; IGF1R, 1.4483659978e-11; PXN, 7.41448873369e-11; GRB10, 9.82254981495e-08; SHC1, 7.62113619067e-05;
BRAF	any non-synonymous	THCA	CLASS I PI3K SIGNALING EVENTS MEDIATED BY AKT	1.86624e-05	0.01	235	2	1	FALSE	TRUE		10	6	0	SFN, 1.15279715975e-14; AKT3, 3.10684023754e-13; TBC1D4, 4.02935457853e-13; SLC2A4, 8.82881775374e-12; BCL2L1, 2.09266008144e-11; SRC, 1.86623953988e-05;
BRAF	600, 601	THCA	HIF-1-ALPHA TRANSCRIPTION FACTOR NETWORK	0.00422811	0.01	235	0	0	FALSE	TRUE		25	13	2	BHLHE41, 2.67989173123e-15; VEGFA, 1.18226964962e-11; SLC2A1, 2.86175771849e-11; BHLHE40, 1.11276836167e-10; PKM2, 1.07601654385e-09; FECH, 1.03322062465e-08; ITGB2, 1.58739713202e-07; NT5E, 2.06906259274e-07; GATA2, 1.47921354491e-06; HMOX1, 4.57645858802e-05; ENG, 0.00016247279266; SMAD3, 0.00017777355153; NDRG1, 0.00422811082145;	TFF3, 1.3525897876e-12;GCK, 6.22050398465e-10;
BRAF	600, 601	THCA	MTOR SIGNALING PATHWAY	0.00462167	0.01	235	0	0	FALSE	TRUE		15	8	0	IRS1, 5.36435633963e-15; SFN, 1.15279715975e-14; PXN, 7.41448873369e-11; SGK1, 3.73320023234e-09; YWHAH, 2.59847689815e-05; SREBF1, 0.00126081114408; PDCD4, 0.00209332828248; PML, 0.00462166615173;
TP53	any non-synonymous	BRCA	ATM PATHWAY	1.10097e-83	0.01	176	103	5	TRUE	FALSE		33	0	0
BRAF	any non-synonymous	THCA	IGF1 PATHWAY	7.62114e-05	0.01	235	2	1	FALSE	TRUE		11	6	0	IRS1, 5.36435633963e-15; IRS2, 7.5008857677e-12; IGF1R, 1.4483659978e-11; PXN, 7.41448873369e-11; GRB10, 9.82254981495e-08; SHC1, 7.62113619067e-05;
TP53	any non-synonymous	BRCA	CASPASE CASCADE IN APOPTOSIS	1.0311e-82	0.01	176	103	5	TRUE	FALSE		56	0	0
BRAF	any non-synonymous	THCA	HIF-1-ALPHA TRANSCRIPTION FACTOR NETWORK	0.00422811	0.01	235	2	1	FALSE	TRUE		25	13	2	BHLHE41, 2.67989173123e-15; VEGFA, 1.18226964962e-11; SLC2A1, 2.86175771849e-11; BHLHE40, 1.11276836167e-10; PKM2, 1.07601654385e-09; FECH, 1.03322062465e-08; ITGB2, 1.58739713202e-07; NT5E, 2.06906259274e-07; GATA2, 1.47921354491e-06; HMOX1, 4.57645858802e-05; ENG, 0.00016247279266; SMAD3, 0.00017777355153; NDRG1, 0.00422811082145;	TFF3, 1.3525897876e-12;GCK, 6.22050398465e-10;
BRAF	600, 601	THCA	ARF6 TRAFFICKING EVENTS	0.0049667	0.01	235	0	0	FALSE	TRUE		18	12	0	ITGA3, 8.66495693252e-21; ASAP2, 8.63753090324e-19; ITGA2, 1.23958468853e-15; ARF6, 5.08658259358e-13; SLC2A4, 8.82881775374e-12; EDNRB, 2.39711477469e-09; IL2RA, 1.02643912366e-07; ITGB1, 6.29975382958e-06; ACAP1, 1.30203114575e-05; ITGA10, 0.000223522159763; CPE, 0.000992781458714; ITGA4, 0.00496669822844;
TP53	any non-synonymous	BRCA	HEDGEHOG SIGNALING EVENTS MEDIATED BY GLI PROTEINS	1.83513e-81	0.01	176	103	5	TRUE	FALSE		45	0	0
BRAF	600, 601	THCA	SIGNALING EVENTS MEDIATED BY HEPATOCYTE GROWTH FACTOR RECEPTOR (C-MET)	7.62114e-05	0.01	235	0	0	FALSE	TRUE		25	12	0	MET, 8.83482996419e-20; INPPL1, 7.31514298351e-17; ARF6, 5.08658259358e-13; MUC20, 7.90125111506e-12; PXN, 7.41448873369e-11; RANBP10, 1.68682983478e-10; ARHGEF4, 9.25978420094e-08; HGS, 1.80055626084e-07; SRC, 1.86623953988e-05; F2RL2, 3.00093967604e-05; RIN2, 6.67203869714e-05; SHC1, 7.62113619067e-05;
TP53	any non-synonymous	BRCA	INSULIN-MEDIATED GLUCOSE TRANSPORT	3.63653e-80	0.01	176	103	5	TRUE	FALSE		25	0	0
BRAF	any non-synonymous	THCA	ARF6 TRAFFICKING EVENTS	0.0049667	0.01	235	2	1	FALSE	TRUE		18	12	0	ITGA3, 8.66495693252e-21; ASAP2, 8.63753090324e-19; ITGA2, 1.23958468853e-15; ARF6, 5.08658259358e-13; SLC2A4, 8.82881775374e-12; EDNRB, 2.39711477469e-09; IL2RA, 1.02643912366e-07; ITGB1, 6.29975382958e-06; ACAP1, 1.30203114575e-05; ITGA10, 0.000223522159763; CPE, 0.000992781458714; ITGA4, 0.00496669822844;
BRAF	any non-synonymous	THCA	MTOR SIGNALING PATHWAY	0.00462167	0.01	235	2	1	FALSE	TRUE		15	8	0	IRS1, 5.36435633963e-15; SFN, 1.15279715975e-14; PXN, 7.41448873369e-11; SGK1, 3.73320023234e-09; YWHAH, 2.59847689815e-05; SREBF1, 0.00126081114408; PDCD4, 0.00209332828248; PML, 0.00462166615173;
TP53	any non-synonymous	BRCA	FOXA2 AND FOXA3 TRANSCRIPTION FACTOR NETWORKS	1.72562e-79	0.01	176	103	5	TRUE	FALSE		29	0	0
BRAF	600, 601	THCA	SIGNALING MEDIATED BY P38-GAMMA AND P38-DELTA	8.64452e-05	0.01	235	0	0	FALSE	TRUE		7	6	0	SNTA1, 1.61772544432e-12; MAP2K6, 1.69896818353e-12; STMN1, 4.75927645272e-07; MAPK12, 1.84951874049e-05; MAPK13, 2.13171211132e-05; CCND1, 8.64451888313e-05;
BRAF	600, 601	THCA	HEDGEHOG SIGNALING EVENTS MEDIATED BY GLI PROTEINS	0.0052318	0.01	235	0	0	FALSE	TRUE		21	12	1	LGALS3, 4.08107930064e-16; GNAZ, 1.5245217342e-08; GNB1, 1.62203371891e-08; SMO, 3.91772276602e-06; MTSS1, 2.03995034112e-05; HDAC1, 2.35355150247e-05; GNAI2, 3.00394211669e-05; GLI3, 3.18969552321e-05; RAB23, 0.000808766751124; ARRB2, 0.000952900563745; SUFU, 0.00116271208318; IFT172, 0.00523179943422;	FOXA2, 8.32502331902e-09;
BRAF	600, 601	THCA	P75(NTR)-MEDIATED SIGNALING	0.00300644	0.01	235	0	0	FALSE	TRUE		19	13	0	MAPK10, 1.18651580314e-12; RTN4, 5.29326905034e-11; NGFR, 5.89695445125e-11; MMP7, 1.09291772287e-10; BIRC3, 2.81867195744e-09; RTN4R, 6.14525810116e-08; MYD88, 5.27034408113e-07; MAG, 6.16011626132e-07; APH1A, 2.4643435531e-05; BEX1, 4.90828927683e-05; SHC1, 7.62113619067e-05; ZNF274, 0.00139062777098; NTRK1, 0.00300643586448;
TP53	any non-synonymous	BRCA	SIGNALING MEDIATED BY P38-ALPHA AND P38-BETA	4.02872e-78	0.01	176	103	5	TRUE	FALSE		37	0	0
BRAF	any non-synonymous	THCA	SIGNALING MEDIATED BY P38-GAMMA AND P38-DELTA	8.64452e-05	0.01	235	2	1	FALSE	TRUE		7	6	0	SNTA1, 1.61772544432e-12; MAP2K6, 1.69896818353e-12; STMN1, 4.75927645272e-07; MAPK12, 1.84951874049e-05; MAPK13, 2.13171211132e-05; CCND1, 8.64451888313e-05;
TP53	any non-synonymous	BRCA	VALIDATED TARGETS OF C-MYC TRANSCRIPTIONAL REPRESSION	5.40268e-78	0.01	176	103	5	TRUE	FALSE		60	0	0
BRAF	any non-synonymous	THCA	SIGNALING EVENTS MEDIATED BY HEPATOCYTE GROWTH FACTOR RECEPTOR (C-MET)	7.62114e-05	0.01	235	2	1	FALSE	TRUE		25	12	0	MET, 8.83482996419e-20; INPPL1, 7.31514298351e-17; ARF6, 5.08658259358e-13; MUC20, 7.90125111506e-12; PXN, 7.41448873369e-11; RANBP10, 1.68682983478e-10; ARHGEF4, 9.25978420094e-08; HGS, 1.80055626084e-07; SRC, 1.86623953988e-05; F2RL2, 3.00093967604e-05; RIN2, 6.67203869714e-05; SHC1, 7.62113619067e-05;
BRAF	600, 601	THCA	ERBB RECEPTOR SIGNALING NETWORK	9.06051e-05	0.01	235	0	0	FALSE	TRUE		5	4	1	ERBB3, 5.8034765251e-23; EREG, 1.33824825708e-16; ERBB2, 3.04554767054e-08; HBEGF, 9.06051049931e-05;	NRG2, 1.57540212628e-06;
BRAF	600, 601	THCA	CERAMIDE SIGNALING PATHWAY	0.000310912	0.01	235	0	0	FALSE	TRUE		15	8	0	BID, 1.56757787591e-18; KSR1, 3.01303109658e-17; BCL2, 2.6618493243e-12; RELA, 1.38994730583e-09; BIRC3, 2.81867195744e-09; CTSD, 2.04557872374e-08; TNFRSF1A, 3.67546900141e-08; MAP4K4, 0.000310912200235;
BRAF	600, 601	THCA	RXR AND RAR HETERODIMERIZATION WITH OTHER NUCLEAR RECEPTOR	0.00381048	0.01	235	0	0	FALSE	TRUE		11	7	0	RARG, 9.07729639944e-15; BCL2, 2.6618493243e-12; RXRG, 1.5675447754e-06; RXRB, 0.000816078505424; SREBF1, 0.00126081114408; THRA, 0.00150644908025; PPARD, 0.00381048043259;
BRAF	600, 601	THCA	GLYPICAN 1 NETWORK	0.0048781	0.01	235	0	0	FALSE	TRUE		17	14	1	TGFBR1, 7.48916372328e-23; PRNP, 1.08629887943e-15; LYN, 7.99000433169e-14; FYN, 2.13191602137e-12; VEGFA, 1.18226964962e-11; FGF2, 1.58859651259e-10; SLIT2, 1.4568343627e-09; TGFB2, 6.31236594515e-06; SRC, 1.86623953988e-05; FGR, 3.13592900955e-05; LCK, 0.00257475730447; TGFBR2, 0.0028285247302; TGFB1, 0.00409495316034; TGFB3, 0.00487809745945;	TDGF1, 1.02551128403e-14;
BRAF	any non-synonymous	THCA	HEDGEHOG SIGNALING EVENTS MEDIATED BY GLI PROTEINS	0.0052318	0.01	235	2	1	FALSE	TRUE		21	12	1	LGALS3, 4.08107930064e-16; GNAZ, 1.5245217342e-08; GNB1, 1.62203371891e-08; SMO, 3.91772276602e-06; MTSS1, 2.03995034112e-05; HDAC1, 2.35355150247e-05; GNAI2, 3.00394211669e-05; GLI3, 3.18969552321e-05; RAB23, 0.000808766751124; ARRB2, 0.000952900563745; SUFU, 0.00116271208318; IFT172, 0.00523179943422;	FOXA2, 8.32502331902e-09;
BRAF	any non-synonymous	THCA	P75(NTR)-MEDIATED SIGNALING	0.00300644	0.01	235	2	1	FALSE	TRUE		19	13	0	MAPK10, 1.18651580314e-12; RTN4, 5.29326905034e-11; NGFR, 5.89695445125e-11; MMP7, 1.09291772287e-10; BIRC3, 2.81867195744e-09; RTN4R, 6.14525810116e-08; MYD88, 5.27034408113e-07; MAG, 6.16011626132e-07; APH1A, 2.4643435531e-05; BEX1, 4.90828927683e-05; SHC1, 7.62113619067e-05; ZNF274, 0.00139062777098; NTRK1, 0.00300643586448;
BRAF	any non-synonymous	THCA	RXR AND RAR HETERODIMERIZATION WITH OTHER NUCLEAR RECEPTOR	0.00381048	0.01	235	2	1	FALSE	TRUE		11	7	0	RARG, 9.07729639944e-15; BCL2, 2.6618493243e-12; RXRG, 1.5675447754e-06; RXRB, 0.000816078505424; SREBF1, 0.00126081114408; THRA, 0.00150644908025; PPARD, 0.00381048043259;
BRAF	any non-synonymous	THCA	CERAMIDE SIGNALING PATHWAY	0.000310912	0.01	235	2	1	FALSE	TRUE		15	8	0	BID, 1.56757787591e-18; KSR1, 3.01303109658e-17; BCL2, 2.6618493243e-12; RELA, 1.38994730583e-09; BIRC3, 2.81867195744e-09; CTSD, 2.04557872374e-08; TNFRSF1A, 3.67546900141e-08; MAP4K4, 0.000310912200235;
BRAF	any non-synonymous	THCA	GLYPICAN 1 NETWORK	0.0048781	0.01	235	2	1	FALSE	TRUE		17	14	1	TGFBR1, 7.48916372328e-23; PRNP, 1.08629887943e-15; LYN, 7.99000433169e-14; FYN, 2.13191602137e-12; VEGFA, 1.18226964962e-11; FGF2, 1.58859651259e-10; SLIT2, 1.4568343627e-09; TGFB2, 6.31236594515e-06; SRC, 1.86623953988e-05; FGR, 3.13592900955e-05; LCK, 0.00257475730447; TGFBR2, 0.0028285247302; TGFB1, 0.00409495316034; TGFB3, 0.00487809745945;	TDGF1, 1.02551128403e-14;
BRAF	any non-synonymous	THCA	ERBB RECEPTOR SIGNALING NETWORK	9.06051e-05	0.01	235	2	1	FALSE	TRUE		5	4	1	ERBB3, 5.8034765251e-23; EREG, 1.33824825708e-16; ERBB2, 3.04554767054e-08; HBEGF, 9.06051049931e-05;	NRG2, 1.57540212628e-06;
BRAF	600, 601	THCA	NONCANONICAL WNT SIGNALING PATHWAY	0.000952901	0.01	235	0	0	FALSE	TRUE		10	5	0	FLNA, 3.88592669888e-16; DVL1, 1.50145707948e-11; NLK, 1.21613858375e-08; WNT5A, 1.82016192147e-05; ARRB2, 0.000952900563745;
TP53	any non-synonymous	BRCA	VALIDATED TRANSCRIPTIONAL TARGETS OF DELTANP63 ISOFORMS	4.67007e-74	0.01	176	103	5	TRUE	FALSE		43	0	0
TP53	any non-synonymous	BRCA	ATR SIGNALING PATHWAY	1.21725e-73	0.01	176	103	5	TRUE	FALSE		38	0	0
BRAF	600, 601	THCA	FOXA2 AND FOXA3 TRANSCRIPTION FACTOR NETWORKS	0.00545621	0.01	235	0	0	FALSE	TRUE		14	5	4	FOXA3, 1.79083276579e-08; BDH1, 1.32116055409e-06; FOXF1, 5.24623437826e-06; KCNJ11, 1.72966105089e-05; CPT1C, 0.00545621474388;	APOA1, 8.50459162586e-13;ABCC8, 4.97796471598e-12;GCK, 6.22050398465e-10;FOXA2, 8.32502331902e-09;
TP53	any non-synonymous	BRCA	RAC1 SIGNALING PATHWAY	2.026e-73	0.01	176	103	5	TRUE	FALSE		52	0	0
TP53	any non-synonymous	BRCA	ERBB1 DOWNSTREAM SIGNALING	2.9771e-73	0.01	176	103	5	TRUE	FALSE		107	0	0
BRAF	600, 601	THCA	ALK1 SIGNALING EVENTS	0.0048781	0.01	235	0	0	FALSE	TRUE		11	10	0	TGFBR1, 7.48916372328e-23; ACVR1, 1.26379205266e-19; ACVRL1, 3.86231149422e-09; INHBA, 2.54131266289e-08; ID1, 2.6115018178e-05; ENG, 0.00016247279266; ARRB2, 0.000952900563745; TGFBR2, 0.0028285247302; TGFB1, 0.00409495316034; TGFB3, 0.00487809745945;
BRAF	any non-synonymous	THCA	NONCANONICAL WNT SIGNALING PATHWAY	0.000952901	0.01	235	2	1	FALSE	TRUE		10	5	0	FLNA, 3.88592669888e-16; DVL1, 1.50145707948e-11; NLK, 1.21613858375e-08; WNT5A, 1.82016192147e-05; ARRB2, 0.000952900563745;
BRAF	600, 601	THCA	ATF-2 TRANSCRIPTION FACTOR NETWORK	0.00635191	0.01	235	0	0	FALSE	TRUE		20	14	0	DUSP5, 5.10658903698e-18; IL23A, 2.10473864844e-14; BCL2, 2.6618493243e-12; HES1, 6.75323139778e-12; BCL2L1, 2.09266008144e-11; CBFB, 2.54577729279e-11; PLAU, 2.98997742422e-09; TH, 2.04233885966e-07; PDGFRA, 3.75878456426e-07; ACHE, 4.30385252642e-06; TGFB2, 6.31236594515e-06; CCND1, 8.64451888313e-05; IL6, 0.000592002322468; DUSP1, 0.00635190824626;
BRAF	any non-synonymous	THCA	ALK1 SIGNALING EVENTS	0.0048781	0.01	235	2	1	FALSE	TRUE		11	10	0	TGFBR1, 7.48916372328e-23; ACVR1, 1.26379205266e-19; ACVRL1, 3.86231149422e-09; INHBA, 2.54131266289e-08; ID1, 2.6115018178e-05; ENG, 0.00016247279266; ARRB2, 0.000952900563745; TGFBR2, 0.0028285247302; TGFB1, 0.00409495316034; TGFB3, 0.00487809745945;
BRAF	600, 601	THCA	GLUCOCORTICOID RECEPTOR REGULATORY NETWORK	0.000592002	0.01	235	0	0	FALSE	TRUE		25	18	0	ICAM1, 1.2186898581e-15; SFN, 1.15279715975e-14; CSF2, 4.11486574947e-13; FKBP4, 1.13657700232e-12; MAPK10, 1.18651580314e-12; STAT1, 6.03768775075e-12; GATA3, 2.18988915839e-10; RELA, 1.38994730583e-09; SGK1, 3.73320023234e-09; STAT5A, 7.92693010867e-09; SPI1, 6.68930885049e-06; HDAC1, 2.35355150247e-05; YWHAH, 2.59847689815e-05; IRF1, 3.76566873738e-05; CDK5R1, 8.86335592053e-05; KRT17, 0.00024…
TP53	any non-synonymous	BRCA	ATF-2 TRANSCRIPTION FACTOR NETWORK	5.81734e-71	0.01	176	103	5	TRUE	FALSE		51	0	0
BRAF	any non-synonymous	THCA	FOXA2 AND FOXA3 TRANSCRIPTION FACTOR NETWORKS	0.00545621	0.01	235	2	1	FALSE	TRUE		14	5	4	FOXA3, 1.79083276579e-08; BDH1, 1.32116055409e-06; FOXF1, 5.24623437826e-06; KCNJ11, 1.72966105089e-05; CPT1C, 0.00545621474388;	APOA1, 8.50459162586e-13;ABCC8, 4.97796471598e-12;GCK, 6.22050398465e-10;FOXA2, 8.32502331902e-09;
BRAF	600, 601	THCA	NOTCH-MEDIATED HES/HEY NETWORK	0.00114999	0.01	235	0	0	FALSE	TRUE		15	10	0	RUNX2, 1.76580417336e-13; HES1, 6.75323139778e-12; KDR, 1.01699370771e-10; STAT3, 7.44293929193e-09; GATA6, 1.36468750037e-05; HDAC1, 2.35355150247e-05; ID1, 2.6115018178e-05; MAML1, 4.23306139347e-05; NOTCH1, 0.00078958742165; HEY2, 0.00114999233712;
BRAF	600, 601	THCA	VALIDATED TARGETS OF C-MYC TRANSCRIPTIONAL ACTIVATION	0.0029528	0.01	235	0	0	FALSE	TRUE		24	12	0	HMGA1, 2.18609482447e-19; CAD, 1.64285572445e-11; SLC2A1, 2.86175771849e-11; MYCT1, 6.54214986474e-09; BCAT1, 5.59951923942e-08; CDC25A, 1.43633632234e-07; RCC1, 1.18591017266e-06; MMP9, 1.62405395542e-05; GAPDH, 4.1825682217e-05; SMAD3, 0.00017777355153; FOSL1, 0.000258658991222; ODC1, 0.00295280415237;
TP53	any non-synonymous	BRCA	REGULATION OF NUCLEAR SMAD2/3 SIGNALING	6.75937e-70	0.01	176	103	5	TRUE	FALSE		74	0	0
TP53	any non-synonymous	BRCA	IL2 SIGNALING EVENTS MEDIATED BY PI3K	8.02804e-70	0.01	176	103	5	TRUE	FALSE		34	0	0
BRAF	any non-synonymous	THCA	ATF-2 TRANSCRIPTION FACTOR NETWORK	0.00635191	0.01	235	2	1	FALSE	TRUE		20	14	0	DUSP5, 5.10658903698e-18; IL23A, 2.10473864844e-14; BCL2, 2.6618493243e-12; HES1, 6.75323139778e-12; BCL2L1, 2.09266008144e-11; CBFB, 2.54577729279e-11; PLAU, 2.98997742422e-09; TH, 2.04233885966e-07; PDGFRA, 3.75878456426e-07; ACHE, 4.30385252642e-06; TGFB2, 6.31236594515e-06; CCND1, 8.64451888313e-05; IL6, 0.000592002322468; DUSP1, 0.00635190824626;
BRAF	any non-synonymous	THCA	GLUCOCORTICOID RECEPTOR REGULATORY NETWORK	0.000592002	0.01	235	2	1	FALSE	TRUE		25	18	0	ICAM1, 1.2186898581e-15; SFN, 1.15279715975e-14; CSF2, 4.11486574947e-13; FKBP4, 1.13657700232e-12; MAPK10, 1.18651580314e-12; STAT1, 6.03768775075e-12; GATA3, 2.18988915839e-10; RELA, 1.38994730583e-09; SGK1, 3.73320023234e-09; STAT5A, 7.92693010867e-09; SPI1, 6.68930885049e-06; HDAC1, 2.35355150247e-05; YWHAH, 2.59847689815e-05; IRF1, 3.76566873738e-05; CDK5R1, 8.86335592053e-05; KRT17, 0.00024…
TP53	any non-synonymous	BRCA	SYNDECAN-3-MEDIATED SIGNALING EVENTS	1.80607e-68	0.01	176	103	5	TRUE	FALSE		12	0	0
TP53	any non-synonymous	BRCA	INTEGRIN-LINKED KINASE SIGNALING	2.56878e-68	0.01	176	103	5	TRUE	FALSE		44	0	0
BRAF	any non-synonymous	THCA	NOTCH-MEDIATED HES/HEY NETWORK	0.00114999	0.01	235	2	1	FALSE	TRUE		15	10	0	RUNX2, 1.76580417336e-13; HES1, 6.75323139778e-12; KDR, 1.01699370771e-10; STAT3, 7.44293929193e-09; GATA6, 1.36468750037e-05; HDAC1, 2.35355150247e-05; ID1, 2.6115018178e-05; MAML1, 4.23306139347e-05; NOTCH1, 0.00078958742165; HEY2, 0.00114999233712;
BRAF	600, 601	THCA	VEGFR1 SPECIFIC SIGNALS	1.18227e-11	0.01	235	0	0	FALSE	TRUE		7	3	0	PGF, 4.84901889556e-15; NRP2, 2.45228714075e-12; VEGFA, 1.18226964962e-11;
BRAF	600, 601	THCA	VALIDATED TARGETS OF C-MYC TRANSCRIPTIONAL REPRESSION	0.0066709	0.01	235	0	0	FALSE	TRUE		29	25	0	NDRG2, 5.27393305744e-15; SFXN3, 1.29717821561e-14; BCL2, 2.6618493243e-12; CLU, 1.45126562846e-11; ITGB4, 2.01261731732e-11; CFLAR, 8.33822971908e-10; CDKN2B, 2.152609321e-08; ZFP36L1, 2.49348353784e-08; ERBB2, 3.04554767054e-08; LGALS1, 8.47478810809e-07; FTH1, 2.86197102763e-06; ITGB1, 6.29975382958e-06; SPI1, 6.68930885049e-06; WNT5A, 1.82016192147e-05; HDAC1, 2.35355150247e-05; SFRP1, 2.5855…
BRAF	any non-synonymous	THCA	VALIDATED TARGETS OF C-MYC TRANSCRIPTIONAL ACTIVATION	0.0029528	0.01	235	2	1	FALSE	TRUE		24	12	0	HMGA1, 2.18609482447e-19; CAD, 1.64285572445e-11; SLC2A1, 2.86175771849e-11; MYCT1, 6.54214986474e-09; BCAT1, 5.59951923942e-08; CDC25A, 1.43633632234e-07; RCC1, 1.18591017266e-06; MMP9, 1.62405395542e-05; GAPDH, 4.1825682217e-05; SMAD3, 0.00017777355153; FOSL1, 0.000258658991222; ODC1, 0.00295280415237;
TP53	any non-synonymous	BRCA	P38 SIGNALING MEDIATED BY MAPKAP KINASES	1.78824e-66	0.01	176	103	5	TRUE	FALSE		19	0	0
TP53	any non-synonymous	BRCA	AP-1 TRANSCRIPTION FACTOR NETWORK	1.80186e-66	0.01	176	103	5	TRUE	FALSE		61	0	0
BRAF	600, 601	THCA	S1P3 PATHWAY	3.00394e-05	0.01	235	0	0	FALSE	TRUE		16	9	0	GNA14, 2.80583691497e-20; AKT3, 3.10684023754e-13; VEGFA, 1.18226964962e-11; GNAZ, 1.5245217342e-08; GNA15, 3.56327741646e-08; PDGFB, 1.18423340657e-07; S1PR2, 2.1695300081e-06; SRC, 1.86623953988e-05; GNAI2, 3.00394211669e-05;
CIC	any non-synonymous	LGG	HEDGEHOG SIGNALING EVENTS MEDIATED BY GLI PROTEINS	0.000638748	0.01	30	33	1	TRUE	FALSE		24	0	6		HDAC1, 1.06921578117e-05;GNAI3, 3.62525802459e-05;RBBP4, 4.37070998979e-05;GNB1, 6.62549751045e-05;KIF3A, 0.000379749018913;ARRB2, 0.000638748349757;
TP53	any non-synonymous	BRCA	HIF-2-ALPHA TRANSCRIPTION FACTOR NETWORK	3.30687e-66	0.01	176	103	5	TRUE	FALSE		31	0	0
BRAF	600, 601	THCA	RHOA SIGNALING PATHWAY	3.00094e-05	0.01	235	0	0	FALSE	TRUE		8	6	0	MSN, 2.25228798305e-17; MAP2K6, 1.69896818353e-12; ITGB1, 6.29975382958e-06; RDX, 1.1139647129e-05; MAPK12, 1.84951874049e-05; F2RL2, 3.00093967604e-05;
BRAF	any non-synonymous	THCA	VEGFR1 SPECIFIC SIGNALS	1.18227e-11	0.01	235	2	1	FALSE	TRUE		7	3	0	PGF, 4.84901889556e-15; NRP2, 2.45228714075e-12; VEGFA, 1.18226964962e-11;
TP53	any non-synonymous	LGG	VALIDATED TRANSCRIPTIONAL TARGETS OF TAP63 ISOFORMS	0.00317008	0.01	150	29	2	TRUE	FALSE		24	3	7	NOC2L, 1.65742606699e-09; DHRS3, 3.28683621382e-05; ITGB4, 0.00317007510165;	AEN, 4.59255274437e-11;MFGE8, 1.11285130498e-05;SPATA18, 7.52270262464e-05;ABL1, 0.00056032140577;NQO1, 0.000737680318481;SHH, 0.000897407954968;GDF15, 0.00159800388576;
BRAF	any non-synonymous	THCA	VALIDATED TARGETS OF C-MYC TRANSCRIPTIONAL REPRESSION	0.0066709	0.01	235	2	1	FALSE	TRUE		29	25	0	NDRG2, 5.27393305744e-15; SFXN3, 1.29717821561e-14; BCL2, 2.6618493243e-12; CLU, 1.45126562846e-11; ITGB4, 2.01261731732e-11; CFLAR, 8.33822971908e-10; CDKN2B, 2.152609321e-08; ZFP36L1, 2.49348353784e-08; ERBB2, 3.04554767054e-08; LGALS1, 8.47478810809e-07; FTH1, 2.86197102763e-06; ITGB1, 6.29975382958e-06; SPI1, 6.68930885049e-06; WNT5A, 1.82016192147e-05; HDAC1, 2.35355150247e-05; SFRP1, 2.5855…
TP53	any non-synonymous	BRCA	CDC42 SIGNALING EVENTS	1.57828e-65	0.01	176	103	5	TRUE	FALSE		67	0	0
BRAF	600, 601	THCA	SIGNALING EVENTS MEDIATED BY FOCAL ADHESION KINASE	0.00037447	0.01	235	0	0	FALSE	TRUE		20	12	0	GRB7, 6.63840713809e-22; ELMO1, 5.94242183664e-19; FYN, 2.13191602137e-12; ACTN1, 2.04099211993e-11; PXN, 7.41448873369e-11; CAPN2, 1.61555854302e-08; RGNEF, 3.07615593349e-08; MMP14, 9.88166227388e-08; ITGB1, 6.29975382958e-06; SRC, 1.86623953988e-05; CCND1, 8.64451888313e-05; RRAS, 0.000374469574986;
BRAF	600, 601	THCA	CDC42 SIGNALING EVENTS	0.000959594	0.01	235	0	0	FALSE	TRUE		18	12	0	RASGRF1, 6.7690549806e-16; MAP2K6, 1.69896818353e-12; EPS8, 1.61677920134e-11; PRKCE, 8.76210368612e-11; BAIAP2, 2.25526128844e-09; TIAM1, 9.64732566665e-08; ARPC2, 1.33521943744e-07; MAP2K7, 1.13372713875e-06; SRC, 1.86623953988e-05; F2RL2, 3.00093967604e-05; MAP3K11, 0.000152247967685; ARPC1B, 0.000959594268325;
BRAF	600, 601	THCA	SIGNALING EVENTS MEDIATED BY HDAC CLASS I	0.00281442	0.01	235	0	0	FALSE	TRUE		21	12	0	CHD4, 3.19880209661e-15; GATAD2A, 1.12096654742e-14; UBE2I, 5.9955715153e-12; RELA, 1.38994730583e-09; STAT3, 7.44293929193e-09; TNFRSF1A, 3.67546900141e-08; GATA2, 1.47921354491e-06; SMURF1, 2.20893513041e-06; HDAC1, 2.35355150247e-05; SMG5, 0.000110554715131; RANGAP1, 0.000219534755187; HDAC9, 0.00281441740425;
BRAF	any non-synonymous	THCA	S1P3 PATHWAY	3.00394e-05	0.01	235	2	1	FALSE	TRUE		16	9	0	GNA14, 2.80583691497e-20; AKT3, 3.10684023754e-13; VEGFA, 1.18226964962e-11; GNAZ, 1.5245217342e-08; GNA15, 3.56327741646e-08; PDGFB, 1.18423340657e-07; S1PR2, 2.1695300081e-06; SRC, 1.86623953988e-05; GNAI2, 3.00394211669e-05;
BRAF	any non-synonymous	THCA	RHOA SIGNALING PATHWAY	3.00094e-05	0.01	235	2	1	FALSE	TRUE		8	6	0	MSN, 2.25228798305e-17; MAP2K6, 1.69896818353e-12; ITGB1, 6.29975382958e-06; RDX, 1.1139647129e-05; MAPK12, 1.84951874049e-05; F2RL2, 3.00093967604e-05;
CIC	any non-synonymous	LGG	SIGNALING EVENTS REGULATED BY RET TYROSINE KINASE	0.0012646	0.01	30	33	1	TRUE	FALSE		16	0	4		GFRA1, 5.20963897097e-06;RAP1A, 0.000138173557494;DOK4, 0.000491523896513;PDLIM7, 0.00126459925685;
BRAF	any non-synonymous	THCA	CDC42 SIGNALING EVENTS	0.000959594	0.01	235	2	1	FALSE	TRUE		18	12	0	RASGRF1, 6.7690549806e-16; MAP2K6, 1.69896818353e-12; EPS8, 1.61677920134e-11; PRKCE, 8.76210368612e-11; BAIAP2, 2.25526128844e-09; TIAM1, 9.64732566665e-08; ARPC2, 1.33521943744e-07; MAP2K7, 1.13372713875e-06; SRC, 1.86623953988e-05; F2RL2, 3.00093967604e-05; MAP3K11, 0.000152247967685; ARPC1B, 0.000959594268325;
BRAF	600, 601	THCA	ERBB4 SIGNALING EVENTS	0.00406639	0.01	235	0	0	FALSE	TRUE		13	11	1	EREG, 1.33824825708e-16; FYN, 2.13191602137e-12; STAT5A, 7.92693010867e-09; ERBB2, 3.04554767054e-08; PIK3CD, 2.03706604208e-06; LRIG1, 2.05753889616e-06; PIK3R2, 2.44715338401e-05; SHC1, 7.62113619067e-05; HBEGF, 9.06051049931e-05; CBFA2T3, 0.00378390020888; DLG4, 0.00406638858088;	NRG2, 1.57540212628e-06;
BRAF	600, 601	THCA	PRESENILIN ACTION IN NOTCH AND WNT SIGNALING	0.00381048	0.01	235	0	0	FALSE	TRUE		13	9	0	DVL1, 1.50145707948e-11; PPP2R5D, 3.13256115374e-10; NLK, 1.21613858375e-08; KREMEN2, 2.06871049724e-05; HDAC1, 2.35355150247e-05; APH1A, 2.4643435531e-05; CCND1, 8.64451888313e-05; NOTCH1, 0.00078958742165; PPARD, 0.00381048043259;
BRAF	600, 601	THCA	LKB1 SIGNALING EVENTS	0.00195571	0.01	235	0	0	FALSE	TRUE		9	7	0	SFN, 1.15279715975e-14; STRADB, 2.1349346193e-11; CTSD, 2.04557872374e-08; ETV4, 5.50191190519e-07; YWHAH, 2.59847689815e-05; SIK3, 7.20608252823e-05; PRKAA2, 0.00195571387254;
CIC	any non-synonymous	LGG	FOXA2 AND FOXA3 TRANSCRIPTION FACTOR NETWORKS	0.00056879	0.01	30	33	1	TRUE	FALSE		20	0	4		ACADM, 3.55555282667e-06;HMGCS1, 9.43971194103e-05;ABCC8, 0.000172347115747;G6PC, 0.000568789579381;
BRAF	any non-synonymous	THCA	SIGNALING EVENTS MEDIATED BY FOCAL ADHESION KINASE	0.00037447	0.01	235	2	1	FALSE	TRUE		20	12	0	GRB7, 6.63840713809e-22; ELMO1, 5.94242183664e-19; FYN, 2.13191602137e-12; ACTN1, 2.04099211993e-11; PXN, 7.41448873369e-11; CAPN2, 1.61555854302e-08; RGNEF, 3.07615593349e-08; MMP14, 9.88166227388e-08; ITGB1, 6.29975382958e-06; SRC, 1.86623953988e-05; CCND1, 8.64451888313e-05; RRAS, 0.000374469574986;
CIC	any non-synonymous	LGG	INTERNALIZATION OF ERBB1	0.000177064	0.01	30	33	1	TRUE	FALSE		20	0	2		CDC42, 1.44762671174e-05;NRAS, 0.000177063877618;
BRAF	600, 601	THCA	ALPHA-SYNUCLEIN SIGNALING	0.00257476	0.01	235	0	0	FALSE	TRUE		13	10	0	KLK6, 1.18120094851e-18; LYN, 7.99000433169e-14; FYN, 2.13191602137e-12; PPP2R5D, 3.13256115374e-10; PTK2B, 4.70330680543e-09; TH, 2.04233885966e-07; SRC, 1.86623953988e-05; FGR, 3.13592900955e-05; PLCB2, 0.000498453625986; LCK, 0.00257475730447;
BRAF	any non-synonymous	THCA	PRESENILIN ACTION IN NOTCH AND WNT SIGNALING	0.00381048	0.01	235	2	1	FALSE	TRUE		13	9	0	DVL1, 1.50145707948e-11; PPP2R5D, 3.13256115374e-10; NLK, 1.21613858375e-08; KREMEN2, 2.06871049724e-05; HDAC1, 2.35355150247e-05; APH1A, 2.4643435531e-05; CCND1, 8.64451888313e-05; NOTCH1, 0.00078958742165; PPARD, 0.00381048043259;
BRAF	any non-synonymous	THCA	SIGNALING EVENTS MEDIATED BY HDAC CLASS I	0.00281442	0.01	235	2	1	FALSE	TRUE		21	12	0	CHD4, 3.19880209661e-15; GATAD2A, 1.12096654742e-14; UBE2I, 5.9955715153e-12; RELA, 1.38994730583e-09; STAT3, 7.44293929193e-09; TNFRSF1A, 3.67546900141e-08; GATA2, 1.47921354491e-06; SMURF1, 2.20893513041e-06; HDAC1, 2.35355150247e-05; SMG5, 0.000110554715131; RANGAP1, 0.000219534755187; HDAC9, 0.00281441740425;
TP53	any non-synonymous	BRCA	IGF1 PATHWAY	7.12541e-63	0.01	176	103	5	TRUE	FALSE		29	0	0
BRAF	any non-synonymous	THCA	ERBB4 SIGNALING EVENTS	0.00406639	0.01	235	2	1	FALSE	TRUE		13	11	1	EREG, 1.33824825708e-16; FYN, 2.13191602137e-12; STAT5A, 7.92693010867e-09; ERBB2, 3.04554767054e-08; PIK3CD, 2.03706604208e-06; LRIG1, 2.05753889616e-06; PIK3R2, 2.44715338401e-05; SHC1, 7.62113619067e-05; HBEGF, 9.06051049931e-05; CBFA2T3, 0.00378390020888; DLG4, 0.00406638858088;	NRG2, 1.57540212628e-06;
BRAF	any non-synonymous	THCA	LKB1 SIGNALING EVENTS	0.00195571	0.01	235	2	1	FALSE	TRUE		9	7	0	SFN, 1.15279715975e-14; STRADB, 2.1349346193e-11; CTSD, 2.04557872374e-08; ETV4, 5.50191190519e-07; YWHAH, 2.59847689815e-05; SIK3, 7.20608252823e-05; PRKAA2, 0.00195571387254;
TP53	any non-synonymous	BRCA	VALIDATED TRANSCRIPTIONAL TARGETS OF AP1 FAMILY MEMBERS FRA1 AND FRA2	2.34722e-62	0.01	176	103	5	TRUE	FALSE		36	0	0
BRAF	600, 601	THCA	VEGF AND VEGFR SIGNALING NETWORK	1.01699e-10	0.01	235	0	0	FALSE	TRUE		5	5	0	PGF, 4.84901889556e-15; NRP2, 2.45228714075e-12; VEGFA, 1.18226964962e-11; FLT4, 3.2983951201e-11; KDR, 1.01699370771e-10;
BRAF	any non-synonymous	THCA	ALPHA-SYNUCLEIN SIGNALING	0.00257476	0.01	235	2	1	FALSE	TRUE		13	10	0	KLK6, 1.18120094851e-18; LYN, 7.99000433169e-14; FYN, 2.13191602137e-12; PPP2R5D, 3.13256115374e-10; PTK2B, 4.70330680543e-09; TH, 2.04233885966e-07; SRC, 1.86623953988e-05; FGR, 3.13592900955e-05; PLCB2, 0.000498453625986; LCK, 0.00257475730447;
TP53	any non-synonymous	BRCA	NOTCH-MEDIATED HES/HEY NETWORK	7.41437e-62	0.01	176	103	5	TRUE	FALSE		44	0	0
BRAF	600, 601	THCA	FGF SIGNALING PATHWAY	0.000613703	0.01	235	0	0	FALSE	TRUE		27	20	0	MET, 8.83482996419e-20; SDC4, 3.04509370441e-18; FGF9, 6.75272806423e-17; IL17RD, 1.3347932286e-15; RUNX2, 1.76580417336e-13; CTTN, 1.05445191062e-12; STAT1, 6.03768775075e-12; PLAUR, 1.24340169984e-10; FGF2, 1.58859651259e-10; DUSP6, 2.1230440468e-10; NCAM1, 8.85383704921e-10; PLAU, 2.98997742422e-09; PTK2B, 4.70330680543e-09; STAT3, 7.44293929193e-09; SPP1, 1.61205628216e-06; KL, 7.67916300859e…
BRAF	600, 601	THCA	C-MYB TRANSCRIPTION FACTOR NETWORK	0.00449855	0.01	235	0	0	FALSE	TRUE		32	18	1	BCL2, 2.6618493243e-12; UBE2I, 5.9955715153e-12; HES1, 6.75323139778e-12; CCNA1, 3.19451738411e-11; GATA3, 2.18988915839e-10; BIRC3, 2.81867195744e-09; NLK, 1.21613858375e-08; LYZ, 6.86668010354e-08; CD34, 1.79052801708e-06; SPI1, 6.68930885049e-06; CLTA, 3.37341459717e-05; CCND1, 8.64451888313e-05; ANPEP, 0.00017777355153; PPP3CA, 0.000191236438036; CDK6, 0.000208619195295; PRTN3, 0.000308743414…	RAG2, 3.63375241301e-09;
TP53	any non-synonymous	BRCA	PLK3 SIGNALING EVENTS	3.78922e-61	0.01	176	103	5	TRUE	FALSE		4	0	0
BRAF	600, 601	THCA	ANGIOPOIETIN RECEPTOR TIE2-MEDIATED SIGNALING	7.62114e-05	0.01	235	0	0	FALSE	TRUE		23	12	0	FN1, 5.68523262738e-22; GRB7, 6.63840713809e-22; FYN, 2.13191602137e-12; PXN, 7.41448873369e-11; FGF2, 1.58859651259e-10; ELK1, 1.73299466099e-10; GRB14, 1.23154051501e-09; RELA, 1.38994730583e-09; STAT5A, 7.92693010867e-09; DOK2, 2.06699456433e-07; ITGB1, 6.29975382958e-06; SHC1, 7.62113619067e-05;
BRAF	any non-synonymous	THCA	VEGF AND VEGFR SIGNALING NETWORK	1.01699e-10	0.01	235	2	1	FALSE	TRUE		5	5	0	PGF, 4.84901889556e-15; NRP2, 2.45228714075e-12; VEGFA, 1.18226964962e-11; FLT4, 3.2983951201e-11; KDR, 1.01699370771e-10;
BRAF	600, 601	THCA	BETA3 INTEGRIN CELL SURFACE INTERACTIONS	0.00449855	0.01	235	0	0	FALSE	TRUE		21	16	0	FN1, 5.68523262738e-22; SDC4, 3.04509370441e-18; SPHK1, 1.15001662054e-15; VEGFA, 1.18226964962e-11; KDR, 1.01699370771e-10; PLAUR, 1.24340169984e-10; COL1A1, 1.60135625561e-10; F11R, 1.70378275646e-10; PLAU, 2.98997742422e-09; PDGFB, 1.18423340657e-07; SPP1, 1.61205628216e-06; COL4A1, 0.000447425730225; THBS1, 0.000643235274119; LAMA4, 0.00125703437863; TGFBR2, 0.0028285247302; COL1A2, 0.0044985…
BRAF	any non-synonymous	THCA	C-MYB TRANSCRIPTION FACTOR NETWORK	0.00449855	0.01	235	2	1	FALSE	TRUE		32	18	1	BCL2, 2.6618493243e-12; UBE2I, 5.9955715153e-12; HES1, 6.75323139778e-12; CCNA1, 3.19451738411e-11; GATA3, 2.18988915839e-10; BIRC3, 2.81867195744e-09; NLK, 1.21613858375e-08; LYZ, 6.86668010354e-08; CD34, 1.79052801708e-06; SPI1, 6.68930885049e-06; CLTA, 3.37341459717e-05; CCND1, 8.64451888313e-05; ANPEP, 0.00017777355153; PPP3CA, 0.000191236438036; CDK6, 0.000208619195295; PRTN3, 0.000308743414…	RAG2, 3.63375241301e-09;
TP53	any non-synonymous	BRCA	COREGULATION OF ANDROGEN RECEPTOR ACTIVITY	5.59576e-60	0.01	176	103	5	TRUE	FALSE		57	0	0
TP53	any non-synonymous	BRCA	LISSENCEPHALY GENE (LIS1) IN NEURONAL MIGRATION AND DEVELOPMENT	5.84963e-60	0.01	176	103	5	TRUE	FALSE		28	0	0
BRAF	600, 601	THCA	EFFECTS OF BOTULINUM TOXIN	0.000387808	0.01	235	0	0	FALSE	TRUE		4	4	0	SNAP25, 1.4012455055e-16; SYT1, 1.25308211555e-13; STXBP1, 5.10648120775e-06; CHRNA1, 0.000387808072201;
CIC	any non-synonymous	LGG	SIGNALING EVENTS MEDIATED BY HEPATOCYTE GROWTH FACTOR RECEPTOR (C-MET)	0.00216356	0.01	30	33	1	TRUE	FALSE		38	0	9		CDC42, 1.44762671174e-05;AKT2, 1.63546221544e-05;PAK4, 5.41366041089e-05;MTOR, 6.39761628149e-05;RAP1A, 0.000138173557494;NUMB, 0.000465220067914;INPP5D, 0.00106370200264;HGF, 0.00171215922557;INPPL1, 0.00216356057517;
BRAF	600, 601	THCA	EPHA2 FORWARD SIGNALING	7.62114e-05	0.01	235	0	0	FALSE	TRUE		6	5	0	INPPL1, 7.31514298351e-17; EPHA2, 1.21007306726e-08; TIAM1, 9.64732566665e-08; EFNA1, 1.58422551044e-07; SHC1, 7.62113619067e-05;
BRAF	any non-synonymous	THCA	FGF SIGNALING PATHWAY	0.000613703	0.01	235	2	1	FALSE	TRUE		27	20	0	MET, 8.83482996419e-20; SDC4, 3.04509370441e-18; FGF9, 6.75272806423e-17; IL17RD, 1.3347932286e-15; RUNX2, 1.76580417336e-13; CTTN, 1.05445191062e-12; STAT1, 6.03768775075e-12; PLAUR, 1.24340169984e-10; FGF2, 1.58859651259e-10; DUSP6, 2.1230440468e-10; NCAM1, 8.85383704921e-10; PLAU, 2.98997742422e-09; PTK2B, 4.70330680543e-09; STAT3, 7.44293929193e-09; SPP1, 1.61205628216e-06; KL, 7.67916300859e…
BRAF	600, 601	THCA	PAR4-MEDIATED THROMBIN SIGNALING EVENTS	0.000498454	0.01	235	0	0	FALSE	TRUE		5	5	0	GNA14, 2.80583691497e-20; GNB1, 1.62203371891e-08; GNA15, 3.56327741646e-08; F2RL2, 3.00093967604e-05; PLCB2, 0.000498453625986;
BRAF	600, 601	THCA	ERBB2/ERBB3 SIGNALING EVENTS	0.000387808	0.01	235	0	0	FALSE	TRUE		15	10	1	ERBB3, 5.8034765251e-23; MAPK10, 1.18651580314e-12; STAT3, 7.44293929193e-09; ERBB2, 3.04554767054e-08; PIK3CD, 2.03706604208e-06; SRC, 1.86623953988e-05; PIK3R2, 2.44715338401e-05; SHC1, 7.62113619067e-05; CHRNE, 0.000255318186616; CHRNA1, 0.000387808072201;	NRG2, 1.57540212628e-06;
BRAF	600, 601	THCA	EPO SIGNALING PATHWAY	0.000208828	0.01	235	0	0	FALSE	TRUE		18	10	0	LYN, 7.99000433169e-14; BCL2, 2.6618493243e-12; STAT1, 6.03768775075e-12; IRS2, 7.5008857677e-12; BCL2L1, 2.09266008144e-11; TEC, 5.83827877409e-11; TRPC6, 4.94239944031e-10; STAT5A, 7.92693010867e-09; SHC1, 7.62113619067e-05; BTK, 0.000208827918835;
BRAF	any non-synonymous	THCA	ANGIOPOIETIN RECEPTOR TIE2-MEDIATED SIGNALING	7.62114e-05	0.01	235	2	1	FALSE	TRUE		23	12	0	FN1, 5.68523262738e-22; GRB7, 6.63840713809e-22; FYN, 2.13191602137e-12; PXN, 7.41448873369e-11; FGF2, 1.58859651259e-10; ELK1, 1.73299466099e-10; GRB14, 1.23154051501e-09; RELA, 1.38994730583e-09; STAT5A, 7.92693010867e-09; DOK2, 2.06699456433e-07; ITGB1, 6.29975382958e-06; SHC1, 7.62113619067e-05;
BRAF	600, 601	THCA	IL6-MEDIATED SIGNALING EVENTS	0.00432648	0.01	235	0	0	FALSE	TRUE		18	13	0	PTPRE, 1.11279185905e-22; TIMP1, 2.30756141383e-14; MAP2K6, 1.69896818353e-12; STAT1, 6.03768775075e-12; BCL2L1, 2.09266008144e-11; HSP90B1, 1.38659476201e-10; STAT3, 7.44293929193e-09; IRF1, 3.76566873738e-05; VAV1, 6.19613347824e-05; LMO4, 6.39761628149e-05; IL6, 0.000592002322468; IL6R, 0.00359935721806; A2M, 0.00432648432909;
BRAF	any non-synonymous	THCA	BETA3 INTEGRIN CELL SURFACE INTERACTIONS	0.00449855	0.01	235	2	1	FALSE	TRUE		21	16	0	FN1, 5.68523262738e-22; SDC4, 3.04509370441e-18; SPHK1, 1.15001662054e-15; VEGFA, 1.18226964962e-11; KDR, 1.01699370771e-10; PLAUR, 1.24340169984e-10; COL1A1, 1.60135625561e-10; F11R, 1.70378275646e-10; PLAU, 2.98997742422e-09; PDGFB, 1.18423340657e-07; SPP1, 1.61205628216e-06; COL4A1, 0.000447425730225; THBS1, 0.000643235274119; LAMA4, 0.00125703437863; TGFBR2, 0.0028285247302; COL1A2, 0.0044985…
TP53	any non-synonymous	LGG	ALPHA4 BETA1 INTEGRIN SIGNALING EVENTS	0.000342239	0.01	150	29	2	TRUE	FALSE		13	3	2	VCAM1, 5.54380309206e-08; ABI1, 1.19304702284e-06; ADAM28, 5.91165286538e-05;	MDK, 0.000162310401076;THBS2, 0.000342239422515;
BRAF	600, 601	THCA	REGULATION OF RETINOBLASTOMA PROTEIN	0.00603005	0.01	235	0	0	FALSE	TRUE		18	11	0	MET, 8.83482996419e-20; RUNX2, 1.76580417336e-13; CSF2, 4.11486574947e-13; CCND3, 2.96687899828e-06; TGFB2, 6.31236594515e-06; SPI1, 6.68930885049e-06; HDAC1, 2.35355150247e-05; CCND1, 8.64451888313e-05; CDK6, 0.000208619195295; CKM, 0.00382575287885; E2F4, 0.00603004985771;
BRAF	any non-synonymous	THCA	PAR4-MEDIATED THROMBIN SIGNALING EVENTS	0.000498454	0.01	235	2	1	FALSE	TRUE		5	5	0	GNA14, 2.80583691497e-20; GNB1, 1.62203371891e-08; GNA15, 3.56327741646e-08; F2RL2, 3.00093967604e-05; PLCB2, 0.000498453625986;
TP53	any non-synonymous	LGG	SIGNALING EVENTS MEDIATED BY STEM CELL FACTOR RECEPTOR (C-KIT)	0.0016173	0.01	150	29	2	TRUE	FALSE		24	3	6	VAV1, 0.000131172146764; PTPN6, 0.000218658370105; MAP4K1, 0.00161729545028;	GRB10, 3.74660812225e-10;SPRED1, 2.45779802412e-09;SPRED2, 2.85841088829e-09;KITLG, 0.000703108035606;PIK3C2B, 0.000945307770902;RAF1, 0.00109500100271;
TP53	any non-synonymous	BRCA	FANCONI ANEMIA PATHWAY	5.04756e-58	0.01	176	103	5	TRUE	FALSE		44	0	0
BRAF	600, 601	THCA	PDGFR-BETA SIGNALING PATHWAY	0.00405421	0.01	235	0	0	FALSE	TRUE		52	33	0	KSR1, 3.01303109658e-17; SPHK1, 1.15001662054e-15; SFN, 1.15279715975e-14; LYN, 7.99000433169e-14; CTTN, 1.05445191062e-12; MAPK10, 1.18651580314e-12; FYN, 2.13191602137e-12; STAT1, 6.03768775075e-12; EPS8, 1.61677920134e-11; PRKCE, 8.76210368612e-11; LRP1, 1.54318880772e-10; ELK1, 1.73299466099e-10; BAIAP2, 2.25526128844e-09; STAT3, 7.44293929193e-09; STAT5A, 7.92693010867e-09; GRB10, 9.82254981…
BRAF	600, 601	THCA	SIGNALING EVENTS MEDIATED BY TCPTP	0.0011744	0.01	235	0	0	FALSE	TRUE		21	16	0	MET, 8.83482996419e-20; STAT6, 4.12722888214e-13; STAT1, 6.03768775075e-12; VEGFA, 1.18226964962e-11; KDR, 1.01699370771e-10; JAK3, 3.28659123851e-10; STAT3, 7.44293929193e-09; STAT5A, 7.92693010867e-09; PDGFB, 1.18423340657e-07; CSF1, 1.57317465498e-07; PIK3CD, 2.03706604208e-06; ITGB1, 6.29975382958e-06; SRC, 1.86623953988e-05; PIK3R2, 2.44715338401e-05; SHC1, 7.62113619067e-05; CSF1R, 0.001174…
TP53	any non-synonymous	BRCA	ARF6 DOWNSTREAM PATHWAY	9.68236e-58	0.01	176	103	5	TRUE	FALSE		14	0	0
TP53	any non-synonymous	BRCA	DEGRADATION OF BETA CATENIN	1.29431e-57	0.01	176	103	5	TRUE	FALSE		16	0	0
BRAF	any non-synonymous	THCA	EPO SIGNALING PATHWAY	0.000208828	0.01	235	2	1	FALSE	TRUE		18	10	0	LYN, 7.99000433169e-14; BCL2, 2.6618493243e-12; STAT1, 6.03768775075e-12; IRS2, 7.5008857677e-12; BCL2L1, 2.09266008144e-11; TEC, 5.83827877409e-11; TRPC6, 4.94239944031e-10; STAT5A, 7.92693010867e-09; SHC1, 7.62113619067e-05; BTK, 0.000208827918835;
BRAF	any non-synonymous	THCA	IL6-MEDIATED SIGNALING EVENTS	0.00432648	0.01	235	2	1	FALSE	TRUE		18	13	0	PTPRE, 1.11279185905e-22; TIMP1, 2.30756141383e-14; MAP2K6, 1.69896818353e-12; STAT1, 6.03768775075e-12; BCL2L1, 2.09266008144e-11; HSP90B1, 1.38659476201e-10; STAT3, 7.44293929193e-09; IRF1, 3.76566873738e-05; VAV1, 6.19613347824e-05; LMO4, 6.39761628149e-05; IL6, 0.000592002322468; IL6R, 0.00359935721806; A2M, 0.00432648432909;
BRAF	any non-synonymous	THCA	EPHA2 FORWARD SIGNALING	7.62114e-05	0.01	235	2	1	FALSE	TRUE		6	5	0	INPPL1, 7.31514298351e-17; EPHA2, 1.21007306726e-08; TIAM1, 9.64732566665e-08; EFNA1, 1.58422551044e-07; SHC1, 7.62113619067e-05;
BRAF	any non-synonymous	THCA	REGULATION OF RETINOBLASTOMA PROTEIN	0.00603005	0.01	235	2	1	FALSE	TRUE		18	11	0	MET, 8.83482996419e-20; RUNX2, 1.76580417336e-13; CSF2, 4.11486574947e-13; CCND3, 2.96687899828e-06; TGFB2, 6.31236594515e-06; SPI1, 6.68930885049e-06; HDAC1, 2.35355150247e-05; CCND1, 8.64451888313e-05; CDK6, 0.000208619195295; CKM, 0.00382575287885; E2F4, 0.00603004985771;
TP53	any non-synonymous	LGG	HEDGEHOG SIGNALING EVENTS MEDIATED BY GLI PROTEINS	0.0043656	0.01	150	29	2	TRUE	FALSE		24	5	6	RBBP4, 2.06029861275e-10; GNAI3, 6.68098770699e-09; HDAC1, 1.63478379146e-06; ARRB2, 4.11447217744e-06; PTCH1, 4.70170620401e-05;	GNB1, 1.78620927521e-07;SUFU, 0.00017012110367;LGALS3, 0.000253790864046;CSNK1E, 0.000837574787286;SHH, 0.000897407954968;KIF3A, 0.00436559843752;
BRAF	600, 601	THCA	S1P1 PATHWAY	0.000498454	0.01	235	0	0	FALSE	TRUE		11	7	0	SPHK1, 1.15001662054e-15; VEGFA, 1.18226964962e-11; KDR, 1.01699370771e-10; GNAZ, 1.5245217342e-08; PDGFB, 1.18423340657e-07; GNAI2, 3.00394211669e-05; PLCB2, 0.000498453625986;
BRAF	600, 601	THCA	DIRECT P53 EFFECTORS	0.00462167	0.01	235	0	0	FALSE	TRUE		58	34	0	MET, 8.83482996419e-20; PERP, 2.15570273793e-19; BID, 1.56757787591e-18; DUSP5, 5.10658903698e-18; SFN, 1.15279715975e-14; IRF5, 8.80386915815e-14; BCL2, 2.6618493243e-12; CD82, 7.9647146396e-12; S100A2, 1.51200415071e-11; BCL2L1, 2.09266008144e-11; PMS2, 1.05955703571e-10; LIF, 1.10169613147e-10; TP53BP2, 3.72792183628e-10; TNFRSF10A, 3.32764829554e-09; TGFA, 4.20917150828e-09; GDF15, 5.53596467…
CIC	any non-synonymous	LGG	MTOR SIGNALING PATHWAY	0.000936838	0.01	30	33	1	TRUE	FALSE		29	0	5		RRAGC, 9.56882633539e-06;MTOR, 6.39761628149e-05;NRAS, 0.000177063877618;RPS6KA1, 0.000824280230758;CDK2, 0.000936838171331;
BRAF	any non-synonymous	THCA	EFFECTS OF BOTULINUM TOXIN	0.000387808	0.01	235	2	1	FALSE	TRUE		4	4	0	SNAP25, 1.4012455055e-16; SYT1, 1.25308211555e-13; STXBP1, 5.10648120775e-06; CHRNA1, 0.000387808072201;
BRAF	any non-synonymous	THCA	ERBB2/ERBB3 SIGNALING EVENTS	0.000387808	0.01	235	2	1	FALSE	TRUE		15	10	1	ERBB3, 5.8034765251e-23; MAPK10, 1.18651580314e-12; STAT3, 7.44293929193e-09; ERBB2, 3.04554767054e-08; PIK3CD, 2.03706604208e-06; SRC, 1.86623953988e-05; PIK3R2, 2.44715338401e-05; SHC1, 7.62113619067e-05; CHRNE, 0.000255318186616; CHRNA1, 0.000387808072201;	NRG2, 1.57540212628e-06;
BRAF	600, 601	THCA	ALPHA9 BETA1 INTEGRIN SIGNALING EVENTS	0.000267872	0.01	235	0	0	FALSE	TRUE		12	10	0	FN1, 5.68523262738e-22; VEGFA, 1.18226964962e-11; PXN, 7.41448873369e-11; TGM2, 5.81157099859e-10; SPP1, 1.61205628216e-06; ADAM8, 3.210769275e-06; ITGB1, 6.29975382958e-06; ADAM12, 9.18443825612e-06; SRC, 1.86623953988e-05; ADAM15, 0.000267872349168;
TP53	any non-synonymous	LGG	REGULATION OF TELOMERASE	0.000685748	0.01	150	29	2	TRUE	FALSE		22	5	3	RBBP4, 2.06029861275e-10; MTOR, 8.0937782639e-07; HDAC1, 1.63478379146e-06; TGFB1, 9.64968685891e-05; SMAD3, 0.000685748236354;	TERT, 9.89081163922e-13;BLM, 0.000519834534454;ABL1, 0.00056032140577;
TP53	any non-synonymous	LGG	IL2 SIGNALING EVENTS MEDIATED BY PI3K	0.00205188	0.01	150	29	2	TRUE	FALSE		19	2	3	MTOR, 8.0937782639e-07; JAK1, 5.51521456668e-06;	TERT, 9.89081163922e-13;GAB2, 0.000131172146764;SMPD1, 0.00205187760528;
TP53	any non-synonymous	BRCA	RXR AND RAR HETERODIMERIZATION WITH OTHER NUCLEAR RECEPTOR	9.33245e-57	0.01	176	103	5	TRUE	FALSE		23	0	0
TP53	any non-synonymous	BRCA	VISUAL SIGNAL TRANSDUCTION: RODS	9.53394e-57	0.01	176	103	5	TRUE	FALSE		9	0	0
CIC	any non-synonymous	LGG	REGULATION OF TELOMERASE	0.00178382	0.01	30	33	1	TRUE	FALSE		22	0	6		HDAC1, 1.06921578117e-05;RBBP4, 4.37070998979e-05;MTOR, 6.39761628149e-05;SMG5, 0.000863082737084;TERT, 0.00141164441833;TGFB1, 0.00178381669418;
BRAF	any non-synonymous	THCA	PDGFR-BETA SIGNALING PATHWAY	0.00405421	0.01	235	2	1	FALSE	TRUE		52	33	0	KSR1, 3.01303109658e-17; SPHK1, 1.15001662054e-15; SFN, 1.15279715975e-14; LYN, 7.99000433169e-14; CTTN, 1.05445191062e-12; MAPK10, 1.18651580314e-12; FYN, 2.13191602137e-12; STAT1, 6.03768775075e-12; EPS8, 1.61677920134e-11; PRKCE, 8.76210368612e-11; LRP1, 1.54318880772e-10; ELK1, 1.73299466099e-10; BAIAP2, 2.25526128844e-09; STAT3, 7.44293929193e-09; STAT5A, 7.92693010867e-09; GRB10, 9.82254981…
TP53	any non-synonymous	BRCA	IL3-MEDIATED SIGNALING EVENTS	1.98878e-56	0.01	176	103	5	TRUE	FALSE		24	0	0
BRAF	any non-synonymous	THCA	SIGNALING EVENTS MEDIATED BY TCPTP	0.0011744	0.01	235	2	1	FALSE	TRUE		21	16	0	MET, 8.83482996419e-20; STAT6, 4.12722888214e-13; STAT1, 6.03768775075e-12; VEGFA, 1.18226964962e-11; KDR, 1.01699370771e-10; JAK3, 3.28659123851e-10; STAT3, 7.44293929193e-09; STAT5A, 7.92693010867e-09; PDGFB, 1.18423340657e-07; CSF1, 1.57317465498e-07; PIK3CD, 2.03706604208e-06; ITGB1, 6.29975382958e-06; SRC, 1.86623953988e-05; PIK3R2, 2.44715338401e-05; SHC1, 7.62113619067e-05; CSF1R, 0.001174…
TP53	any non-synonymous	BRCA	PDGFR-BETA SIGNALING PATHWAY	5.97928e-56	0.01	176	103	5	TRUE	FALSE		128	0	0
BRAF	600, 601	THCA	A6B1 AND A6B4 INTEGRIN SIGNALING	0.00125703	0.01	235	0	0	FALSE	TRUE		24	15	0	ERBB3, 5.8034765251e-23; MET, 8.83482996419e-20; SFN, 1.15279715975e-14; MST1R, 2.25058751952e-14; LAMB3, 6.99787274237e-13; LAMC2, 8.7460853258e-13; ITGB4, 2.01261731732e-11; ERBB2, 3.04554767054e-08; CD9, 5.96363827678e-08; RXRG, 1.5675447754e-06; ITGB1, 6.29975382958e-06; YWHAH, 2.59847689815e-05; SHC1, 7.62113619067e-05; RXRB, 0.000816078505424; LAMA4, 0.00125703437863;
CIC	any non-synonymous	LGG	ERBB2/ERBB3 SIGNALING EVENTS	0.00234141	0.01	30	33	1	TRUE	FALSE		18	0	5		DOCK7, 5.3415216094e-06;CDC42, 1.44762671174e-05;MTOR, 6.39761628149e-05;NRAS, 0.000177063877618;PIK3CD, 0.00234141460551;
BRAF	any non-synonymous	THCA	DIRECT P53 EFFECTORS	0.00462167	0.01	235	2	1	FALSE	TRUE		58	34	0	MET, 8.83482996419e-20; PERP, 2.15570273793e-19; BID, 1.56757787591e-18; DUSP5, 5.10658903698e-18; SFN, 1.15279715975e-14; IRF5, 8.80386915815e-14; BCL2, 2.6618493243e-12; CD82, 7.9647146396e-12; S100A2, 1.51200415071e-11; BCL2L1, 2.09266008144e-11; PMS2, 1.05955703571e-10; LIF, 1.10169613147e-10; TP53BP2, 3.72792183628e-10; TNFRSF10A, 3.32764829554e-09; TGFA, 4.20917150828e-09; GDF15, 5.53596467…
BRAF	any non-synonymous	THCA	S1P1 PATHWAY	0.000498454	0.01	235	2	1	FALSE	TRUE		11	7	0	SPHK1, 1.15001662054e-15; VEGFA, 1.18226964962e-11; KDR, 1.01699370771e-10; GNAZ, 1.5245217342e-08; PDGFB, 1.18423340657e-07; GNAI2, 3.00394211669e-05; PLCB2, 0.000498453625986;
BRAF	any non-synonymous	THCA	ALPHA9 BETA1 INTEGRIN SIGNALING EVENTS	0.000267872	0.01	235	2	1	FALSE	TRUE		12	10	0	FN1, 5.68523262738e-22; VEGFA, 1.18226964962e-11; PXN, 7.41448873369e-11; TGM2, 5.81157099859e-10; SPP1, 1.61205628216e-06; ADAM8, 3.210769275e-06; ITGB1, 6.29975382958e-06; ADAM12, 9.18443825612e-06; SRC, 1.86623953988e-05; ADAM15, 0.000267872349168;
CDH1	any non-synonymous	BRCA	INSULIN-MEDIATED GLUCOSE TRANSPORT	0.00374251	0.01	19	82	3	TRUE	FALSE		25	0	11		YWHAZ, 3.29727262988e-07;YWHAG, 3.06335450185e-06;VAMP2, 5.71975209816e-05;PPP1CC, 0.000271648936483;YWHAQ, 0.000475092992218;GSK3B, 0.000674189047821;YWHAB, 0.000748080474161;PRKCI, 0.00109719319618;SLC2A4, 0.00216356057517;TRIP10, 0.00252377369393;YWHAE, 0.00374250539546;
BRAF	600, 601	THCA	SYNDECAN-2-MEDIATED SIGNALING EVENTS	0.00409495	0.01	235	0	0	FALSE	TRUE		12	8	0	FN1, 5.68523262738e-22; ITGA2, 1.23958468853e-15; CSF2, 4.11486574947e-13; CAV2, 1.30085418741e-12; ITGB1, 6.29975382958e-06; SRC, 1.86623953988e-05; TNFRSF13B, 0.00285695187634; TGFB1, 0.00409495316034;
BRAF	600, 601	THCA	VEGFR3 SIGNALING IN LYMPHATIC ENDOTHELIUM	0.0049667	0.01	235	0	0	FALSE	TRUE		12	8	0	FN1, 5.68523262738e-22; ITGA2, 1.23958468853e-15; FLT4, 3.2983951201e-11; COL1A1, 1.60135625561e-10; ITGB1, 6.29975382958e-06; SHC1, 7.62113619067e-05; COL1A2, 0.00449855070336; ITGA4, 0.00496669822844;
BRAF	any non-synonymous	THCA	A6B1 AND A6B4 INTEGRIN SIGNALING	0.00125703	0.01	235	2	1	FALSE	TRUE		24	15	0	ERBB3, 5.8034765251e-23; MET, 8.83482996419e-20; SFN, 1.15279715975e-14; MST1R, 2.25058751952e-14; LAMB3, 6.99787274237e-13; LAMC2, 8.7460853258e-13; ITGB4, 2.01261731732e-11; ERBB2, 3.04554767054e-08; CD9, 5.96363827678e-08; RXRG, 1.5675447754e-06; ITGB1, 6.29975382958e-06; YWHAH, 2.59847689815e-05; SHC1, 7.62113619067e-05; RXRB, 0.000816078505424; LAMA4, 0.00125703437863;
TP53	any non-synonymous	BRCA	CLASS I PI3K SIGNALING EVENTS MEDIATED BY AKT	5.89152e-54	0.01	176	103	5	TRUE	FALSE		34	0	0
CDH1	any non-synonymous	BRCA	MTOR SIGNALING PATHWAY	0.00137129	0.01	19	82	3	TRUE	FALSE		68	0	13		YWHAZ, 3.29727262988e-07;YWHAG, 3.06335450185e-06;SSPO, 5.16812812398e-06;MAP2K1, 1.12178982182e-05;CYCS, 1.39086445648e-05;CCNE1, 0.00011797946194;IKBKB, 0.000205307849578;RB1CC1, 0.000268140355498;YWHAQ, 0.000475092992218;RHEB, 0.000892039628323;NRAS, 0.000911881965555;PDCD4, 0.0011557566977;EEF2, 0.00137129462994;
BRAF	any non-synonymous	THCA	SYNDECAN-2-MEDIATED SIGNALING EVENTS	0.00409495	0.01	235	2	1	FALSE	TRUE		12	8	0	FN1, 5.68523262738e-22; ITGA2, 1.23958468853e-15; CSF2, 4.11486574947e-13; CAV2, 1.30085418741e-12; ITGB1, 6.29975382958e-06; SRC, 1.86623953988e-05; TNFRSF13B, 0.00285695187634; TGFB1, 0.00409495316034;
TP53	any non-synonymous	BRCA	REELIN SIGNALING PATHWAY	1.08635e-53	0.01	176	103	5	TRUE	FALSE		26	0	0
TP53	any non-synonymous	BRCA	TRK RECEPTOR SIGNALING MEDIATED BY PI3K AND PLC-GAMMA	1.50809e-53	0.01	176	103	5	TRUE	FALSE		31	0	0
BRAF	600, 601	THCA	STABILIZATION AND EXPANSION OF THE E-CADHERIN ADHERENS JUNCTION	1.48576e-05	0.01	235	0	0	FALSE	TRUE		17	10	0	MET, 8.83482996419e-20; MGAT3, 1.48727647896e-17; ARF6, 5.08658259358e-13; IGF1R, 1.4483659978e-11; ACTN1, 2.04099211993e-11; EPHA2, 1.21007306726e-08; MYO6, 1.22764248453e-07; EFNA1, 1.58422551044e-07; VASP, 2.95085704226e-07; AQP3, 1.48575857236e-05;
TP53	any non-synonymous	BRCA	BARD1 SIGNALING EVENTS	3.28463e-53	0.01	176	103	5	TRUE	FALSE		28	0	0
BRAF	any non-synonymous	THCA	VEGFR3 SIGNALING IN LYMPHATIC ENDOTHELIUM	0.0049667	0.01	235	2	1	FALSE	TRUE		12	8	0	FN1, 5.68523262738e-22; ITGA2, 1.23958468853e-15; FLT4, 3.2983951201e-11; COL1A1, 1.60135625561e-10; ITGB1, 6.29975382958e-06; SHC1, 7.62113619067e-05; COL1A2, 0.00449855070336; ITGA4, 0.00496669822844;
TP53	any non-synonymous	LGG	INTERNALIZATION OF ERBB1	0.001095	0.01	150	29	2	TRUE	FALSE		20	2	3	NRAS, 1.06851072904e-09; CDC42, 6.24331042144e-06;	ZFYVE28, 2.07492594724e-05;ARHGEF7, 0.000497457714977;RAF1, 0.00109500100271;
TP53	any non-synonymous	LGG	STABILIZATION AND EXPANSION OF THE E-CADHERIN ADHERENS JUNCTION	0.000926589	0.01	150	29	2	TRUE	FALSE		21	3	1	ENAH, 7.65298410573e-07; ABI1, 1.19304702284e-06; VASP, 0.000926589422904;	KIFC3, 3.34988315113e-05;
TP53	any non-synonymous	BRCA	CALCINEURIN-REGULATED NFAT-DEPENDENT TRANSCRIPTION IN LYMPHOCYTES	1.34298e-52	0.01	176	103	5	TRUE	FALSE		42	0	0
TP53	any non-synonymous	BRCA	ERBB RECEPTOR SIGNALING NETWORK	2.00655e-52	0.01	176	103	5	TRUE	FALSE		12	0	0
BRAF	600, 601	THCA	NEPHRIN/NEPH1 SIGNALING IN THE KIDNEY PODOCYTE	0.000952901	0.01	235	0	0	FALSE	TRUE		10	6	0	FYN, 2.13191602137e-12; TRPC6, 4.94239944031e-10; PIK3CD, 2.03706604208e-06; PIK3R2, 2.44715338401e-05; F2RL2, 3.00093967604e-05; ARRB2, 0.000952900563745;
CIC	any non-synonymous	LGG	NONCANONICAL WNT SIGNALING PATHWAY	0.000638748	0.01	30	33	1	TRUE	FALSE		20	0	4		CDC42, 1.44762671174e-05;WNT5A, 0.000149382563836;FLNA, 0.000234982385958;ARRB2, 0.000638748349757;
TP53	any non-synonymous	BRCA	SIGNALING EVENTS MEDIATED BY HDAC CLASS III	1.61338e-51	0.01	176	103	5	TRUE	FALSE		27	0	0
BRAF	600, 601	THCA	VALIDATED TRANSCRIPTIONAL TARGETS OF TAP63 ISOFORMS	0.00462167	0.01	235	0	0	FALSE	TRUE		23	14	0	ITGA3, 8.66495693252e-21; PERP, 2.15570273793e-19; DHRS3, 3.92268510434e-15; MFGE8, 1.03460645317e-12; NQO1, 8.72350508049e-12; ITGB4, 2.01261731732e-11; TFAP2C, 6.94381218527e-10; EVPL, 2.63600848874e-09; GDF15, 5.53596467285e-09; DST, 1.93610988099e-08; BBC3, 2.74700316139e-06; TP63, 4.27383075751e-06; SPATA18, 0.000179560205426; PML, 0.00462166615173;
BRAF	any non-synonymous	THCA	STABILIZATION AND EXPANSION OF THE E-CADHERIN ADHERENS JUNCTION	1.48576e-05	0.01	235	2	1	FALSE	TRUE		17	10	0	MET, 8.83482996419e-20; MGAT3, 1.48727647896e-17; ARF6, 5.08658259358e-13; IGF1R, 1.4483659978e-11; ACTN1, 2.04099211993e-11; EPHA2, 1.21007306726e-08; MYO6, 1.22764248453e-07; EFNA1, 1.58422551044e-07; VASP, 2.95085704226e-07; AQP3, 1.48575857236e-05;
TP53	any non-synonymous	BRCA	REGULATION OF ANDROGEN RECEPTOR ACTIVITY	2.25083e-51	0.01	176	103	5	TRUE	FALSE		47	0	0
CIC	any non-synonymous	LGG	ERBB1 DOWNSTREAM SIGNALING	0.000712308	0.01	30	33	1	TRUE	FALSE		45	0	6		CDC42, 1.44762671174e-05;WASF2, 2.24549382808e-05;IQGAP1, 4.0065297393e-05;MTOR, 6.39761628149e-05;NRAS, 0.000177063877618;ARPC1B, 0.000712308110992;
TP53	any non-synonymous	BRCA	ATYPICAL NF-KAPPAB PATHWAY	4.10797e-51	0.01	176	103	5	TRUE	FALSE		16	0	0
CIC	any non-synonymous	LGG	PLASMA MEMBRANE ESTROGEN RECEPTOR SIGNALING	0.000296341	0.01	30	33	1	TRUE	FALSE		19	0	5		GNAI3, 3.62525802459e-05;GNB1, 6.62549751045e-05;NRAS, 0.000177063877618;GNA15, 0.000219096124454;MSN, 0.000296340922859;
BRAF	600, 601	THCA	IL1-MEDIATED SIGNALING EVENTS	9.06958e-05	0.01	235	0	0	FALSE	TRUE		11	7	0	IL1RAP, 3.2849830362e-16; MAP2K6, 1.69896818353e-12; IL1RN, 1.9144608125e-11; RELA, 1.38994730583e-09; MYD88, 5.27034408113e-07; MAP3K3, 7.43296966768e-05; IL1R2, 9.06957554158e-05;
BRAF	any non-synonymous	THCA	NEPHRIN/NEPH1 SIGNALING IN THE KIDNEY PODOCYTE	0.000952901	0.01	235	2	1	FALSE	TRUE		10	6	0	FYN, 2.13191602137e-12; TRPC6, 4.94239944031e-10; PIK3CD, 2.03706604208e-06; PIK3R2, 2.44715338401e-05; F2RL2, 3.00093967604e-05; ARRB2, 0.000952900563745;
BRAF	600, 601	THCA	ATM PATHWAY	0.000347064	0.01	235	0	0	FALSE	TRUE		7	3	0	BID, 1.56757787591e-18; CDC25A, 1.43633632234e-07; BLM, 0.000347064470961;
BRAF	600, 601	THCA	LPA4-MEDIATED SIGNALING EVENTS	8.7621e-11	0.01	235	0	0	FALSE	TRUE		6	3	0	ADCY9, 4.88225014521e-13; ADCY7, 2.4061335328e-12; PRKCE, 8.76210368612e-11;
TP53	any non-synonymous	LGG	NONCANONICAL WNT SIGNALING PATHWAY	0.000390923	0.01	150	29	2	TRUE	FALSE		20	6	1	WNT5A, 3.48574133743e-08; ARRB2, 4.11447217744e-06; DVL1, 4.56998790349e-06; CDC42, 6.24331042144e-06; CHD7, 0.000162310401076; FLNA, 0.000390922979797;	NLK, 4.27133090047e-05;
CIC	any non-synonymous	LGG	CXCR3-MEDIATED SIGNALING EVENTS	0.00361378	0.01	30	33	1	TRUE	FALSE		19	0	7		GNAI3, 3.62525802459e-05;MTOR, 6.39761628149e-05;GNB1, 6.62549751045e-05;NRAS, 0.000177063877618;PIK3CD, 0.00234141460551;PIK3R3, 0.00274767549306;ITGB2, 0.00361378348023;
BRAF	600, 601	THCA	N-CADHERIN SIGNALING EVENTS	3.28275e-08	0.01	235	0	0	FALSE	TRUE		9	4	0	CTTN, 1.05445191062e-12; CAMK2G, 3.65410403811e-10; GRIA2, 3.2390038763e-09; JUP, 3.28274756484e-08;
TP53	any non-synonymous	BRCA	ERBB4 SIGNALING EVENTS	3.73255e-50	0.01	176	103	5	TRUE	FALSE		34	0	0
BRAF	any non-synonymous	THCA	ATM PATHWAY	0.000347064	0.01	235	2	1	FALSE	TRUE		7	3	0	BID, 1.56757787591e-18; CDC25A, 1.43633632234e-07; BLM, 0.000347064470961;
BRAF	any non-synonymous	THCA	VALIDATED TRANSCRIPTIONAL TARGETS OF TAP63 ISOFORMS	0.00462167	0.01	235	2	1	FALSE	TRUE		23	14	0	ITGA3, 8.66495693252e-21; PERP, 2.15570273793e-19; DHRS3, 3.92268510434e-15; MFGE8, 1.03460645317e-12; NQO1, 8.72350508049e-12; ITGB4, 2.01261731732e-11; TFAP2C, 6.94381218527e-10; EVPL, 2.63600848874e-09; GDF15, 5.53596467285e-09; DST, 1.93610988099e-08; BBC3, 2.74700316139e-06; TP63, 4.27383075751e-06; SPATA18, 0.000179560205426; PML, 0.00462166615173;
BRAF	600, 601	THCA	ERBB1 DOWNSTREAM SIGNALING	0.00635191	0.01	235	0	0	FALSE	TRUE		30	21	0	KSR1, 3.01303109658e-17; SFN, 1.15279715975e-14; RIN1, 8.04142421701e-13; STAT1, 6.03768775075e-12; EPS8, 1.61677920134e-11; BCL2L1, 2.09266008144e-11; ELK1, 1.73299466099e-10; DUSP6, 2.1230440468e-10; BAIAP2, 2.25526128844e-09; STAT3, 7.44293929193e-09; CAPN2, 1.61555854302e-08; ARPC2, 1.33521943744e-07; PIK3CD, 2.03706604208e-06; MAPK7, 6.83126970833e-06; SRC, 1.86623953988e-05; PIK3R2, 2.44715…
BRAF	any non-synonymous	THCA	LPA4-MEDIATED SIGNALING EVENTS	8.7621e-11	0.01	235	2	1	FALSE	TRUE		6	3	0	ADCY9, 4.88225014521e-13; ADCY7, 2.4061335328e-12; PRKCE, 8.76210368612e-11;
CIC	any non-synonymous	LGG	INTEGRIN-LINKED KINASE SIGNALING	0.000712308	0.01	30	33	1	TRUE	FALSE		25	0	5		CDC42, 1.44762671174e-05;IQGAP1, 4.0065297393e-05;PPP1R14C, 9.12415657418e-05;LIMS2, 0.000188389298397;RUVBL2, 0.000712308110992;
CDH1	any non-synonymous	BRCA	LKB1 SIGNALING EVENTS	0.00074808	0.01	19	82	3	TRUE	FALSE		46	0	7		YWHAZ, 3.29727262988e-07;HSP90AA1, 4.83603732539e-07;YWHAG, 3.06335450185e-06;STK11, 0.000127677883627;YWHAQ, 0.000475092992218;GSK3B, 0.000674189047821;YWHAB, 0.000748080474161;
CIC	any non-synonymous	LGG	SIGNALING EVENTS MEDIATED BY HDAC CLASS I	0.000863083	0.01	30	33	1	TRUE	FALSE		26	0	4		HDAC1, 1.06921578117e-05;WDR77, 1.1173116249e-05;RBBP4, 4.37070998979e-05;SMG5, 0.000863082737084;
CIC	any non-synonymous	LGG	PDGFR-BETA SIGNALING PATHWAY	0.00169512	0.01	30	33	1	TRUE	FALSE		60	0	11		WASF2, 2.24549382808e-05;IQGAP1, 4.0065297393e-05;ACTN4, 4.11206553272e-05;BLK, 0.000120122320122;RAP1A, 0.000138173557494;NRAS, 0.000177063877618;ARPC1B, 0.000712308110992;SIPA1, 0.000714448243919;ITGB3, 0.000813633938592;PDGFB, 0.00138784929484;PIK3CG, 0.00169512295662;
TP53	any non-synonymous	BRCA	AURORA C SIGNALING	4.4627e-49	0.01	176	103	5	TRUE	FALSE		4	0	0
BRAF	600, 601	THCA	PLASMA MEMBRANE ESTROGEN RECEPTOR SIGNALING	0.000498454	0.01	235	0	0	FALSE	TRUE		20	12	0	GNA14, 2.80583691497e-20; MSN, 2.25228798305e-17; IGF1R, 1.4483659978e-11; GNAZ, 1.5245217342e-08; GNB1, 1.62203371891e-08; GNA15, 3.56327741646e-08; MMP9, 1.62405395542e-05; SRC, 1.86623953988e-05; GNAI2, 3.00394211669e-05; SHC1, 7.62113619067e-05; HBEGF, 9.06051049931e-05; PLCB2, 0.000498453625986;
BRAF	any non-synonymous	THCA	ERBB1 DOWNSTREAM SIGNALING	0.00635191	0.01	235	2	1	FALSE	TRUE		30	21	0	KSR1, 3.01303109658e-17; SFN, 1.15279715975e-14; RIN1, 8.04142421701e-13; STAT1, 6.03768775075e-12; EPS8, 1.61677920134e-11; BCL2L1, 2.09266008144e-11; ELK1, 1.73299466099e-10; DUSP6, 2.1230440468e-10; BAIAP2, 2.25526128844e-09; STAT3, 7.44293929193e-09; CAPN2, 1.61555854302e-08; ARPC2, 1.33521943744e-07; PIK3CD, 2.03706604208e-06; MAPK7, 6.83126970833e-06; SRC, 1.86623953988e-05; PIK3R2, 2.44715…
TP53	any non-synonymous	BRCA	ENDOGENOUS TLR SIGNALING	1.38764e-48	0.01	176	103	5	TRUE	FALSE		24	0	0
BRAF	any non-synonymous	THCA	IL1-MEDIATED SIGNALING EVENTS	9.06958e-05	0.01	235	2	1	FALSE	TRUE		11	7	0	IL1RAP, 3.2849830362e-16; MAP2K6, 1.69896818353e-12; IL1RN, 1.9144608125e-11; RELA, 1.38994730583e-09; MYD88, 5.27034408113e-07; MAP3K3, 7.43296966768e-05; IL1R2, 9.06957554158e-05;
TP53	any non-synonymous	BRCA	ALPHA-SYNUCLEIN SIGNALING	2.24177e-48	0.01	176	103	5	TRUE	FALSE		30	0	0
TP53	any non-synonymous	BRCA	IL2 SIGNALING EVENTS MEDIATED BY STAT5	2.30317e-48	0.01	176	103	5	TRUE	FALSE		27	0	0
BRAF	600, 601	THCA	SHP2 SIGNALING	0.00359936	0.01	235	0	0	FALSE	TRUE		29	17	0	IRS1, 5.36435633963e-15; STAT1, 6.03768775075e-12; VEGFA, 1.18226964962e-11; IGF1R, 1.4483659978e-11; KDR, 1.01699370771e-10; JAK3, 3.28659123851e-10; IFNGR1, 6.56180578347e-09; IL2RA, 1.02643912366e-07; PDGFB, 1.18423340657e-07; IL2RB, 2.76238835337e-07; IL2RG, 6.58971801631e-06; LMO4, 6.39761628149e-05; SHC1, 7.62113619067e-05; IL6, 0.000592002322468; LCK, 0.00257475730447; NTRK1, 0.00300643586…
BRAF	any non-synonymous	THCA	N-CADHERIN SIGNALING EVENTS	3.28275e-08	0.01	235	2	1	FALSE	TRUE		9	4	0	CTTN, 1.05445191062e-12; CAMK2G, 3.65410403811e-10; GRIA2, 3.2390038763e-09; JUP, 3.28274756484e-08;
CIC	any non-synonymous	LGG	P75(NTR)-MEDIATED SIGNALING	0.00128115	0.01	30	33	1	TRUE	FALSE		26	0	4		RHOC, 3.47615036656e-05;PSENEN, 4.70170620401e-05;BEX1, 0.00121622923206;RTN4R, 0.00128114637038;
CIC	any non-synonymous	LGG	GLUCOCORTICOID RECEPTOR REGULATORY NETWORK	1.58554e-05	0.01	30	33	1	TRUE	FALSE		32	0	2		HDAC1, 1.06921578117e-05;NFATC1, 1.58554066856e-05;
BRAF	600, 601	THCA	IL4-MEDIATED SIGNALING EVENTS	0.00638375	0.01	235	0	0	FALSE	TRUE		33	21	1	HMGA1, 2.18609482447e-19; IRS1, 5.36435633963e-15; STAT6, 4.12722888214e-13; IL13RA1, 1.36891864223e-12; IRS2, 7.5008857677e-12; BCL2L1, 2.09266008144e-11; CCL17, 3.76759182043e-11; COL1A1, 1.60135625561e-10; JAK3, 3.28659123851e-10; IL4R, 4.6872728429e-10; PARP14, 7.76220029323e-09; STAT5A, 7.92693010867e-09; DOK2, 2.06699456433e-07; IL2RG, 6.58971801631e-06; SPI1, 6.68930885049e-06; LTA, 6.9832…	TFF3, 1.3525897876e-12;
BRAF	600, 601	THCA	REGULATION OF NUCLEAR SMAD2/3 SIGNALING	0.00449855	0.01	235	0	0	FALSE	TRUE		25	12	0	RUNX1, 1.49385718221e-16; RUNX2, 1.76580417336e-13; MED15, 5.87441340403e-13; CBFB, 2.54577729279e-11; TGIF1, 4.79433984395e-11; GATA3, 2.18988915839e-10; CDKN2B, 2.152609321e-08; CITED1, 1.44065180128e-07; HDAC1, 2.35355150247e-05; SMAD3, 0.00017777355153; RUNX3, 0.000745094128937; COL1A2, 0.00449855070336;
CIC	any non-synonymous	LGG	SIGNALING EVENTS MEDIATED BY STEM CELL FACTOR RECEPTOR (C-KIT)	8.35979e-48	0.01	30	33	1	TRUE	FALSE		24	0	0
BRAF	600, 601	THCA	FAS (CD95) SIGNALING PATHWAY	0.000208828	0.01	235	0	0	FALSE	TRUE		15	10	0	BID, 1.56757787591e-18; MAPK10, 1.18651580314e-12; CFLAR, 8.33822971908e-10; BIRC3, 2.81867195744e-09; FAIM2, 2.0994612075e-08; MAP2K7, 1.13372713875e-06; PIK3CD, 2.03706604208e-06; SRC, 1.86623953988e-05; PIK3R2, 2.44715338401e-05; BTK, 0.000208827918835;
BRAF	600, 601	THCA	LISSENCEPHALY GENE (LIS1) IN NEURONAL MIGRATION AND DEVELOPMENT	8.86336e-05	0.01	235	0	0	FALSE	TRUE		5	3	0	PPP2R5D, 3.13256115374e-10; PAFAH1B3, 4.22532276071e-07; CDK5R1, 8.86335592053e-05;
TP53	any non-synonymous	BRCA	SUMOYLATION BY RANBP2 REGULATES TRANSCRIPTIONAL REPRESSION	1.1086e-47	0.01	176	103	5	TRUE	FALSE		10	0	0
TP53	any non-synonymous	BRCA	TNF RECEPTOR SIGNALING PATHWAY	1.15585e-47	0.01	176	103	5	TRUE	FALSE		45	0	0
BRAF	any non-synonymous	THCA	PLASMA MEMBRANE ESTROGEN RECEPTOR SIGNALING	0.000498454	0.01	235	2	1	FALSE	TRUE		20	12	0	GNA14, 2.80583691497e-20; MSN, 2.25228798305e-17; IGF1R, 1.4483659978e-11; GNAZ, 1.5245217342e-08; GNB1, 1.62203371891e-08; GNA15, 3.56327741646e-08; MMP9, 1.62405395542e-05; SRC, 1.86623953988e-05; GNAI2, 3.00394211669e-05; SHC1, 7.62113619067e-05; HBEGF, 9.06051049931e-05; PLCB2, 0.000498453625986;
TP53	any non-synonymous	BRCA	A6B1 AND A6B4 INTEGRIN SIGNALING	2.68327e-47	0.01	176	103	5	TRUE	FALSE		43	0	0
BRAF	any non-synonymous	THCA	LISSENCEPHALY GENE (LIS1) IN NEURONAL MIGRATION AND DEVELOPMENT	8.86336e-05	0.01	235	2	1	FALSE	TRUE		5	3	0	PPP2R5D, 3.13256115374e-10; PAFAH1B3, 4.22532276071e-07; CDK5R1, 8.86335592053e-05;
BRAF	any non-synonymous	THCA	SHP2 SIGNALING	0.00359936	0.01	235	2	1	FALSE	TRUE		29	17	0	IRS1, 5.36435633963e-15; STAT1, 6.03768775075e-12; VEGFA, 1.18226964962e-11; IGF1R, 1.4483659978e-11; KDR, 1.01699370771e-10; JAK3, 3.28659123851e-10; IFNGR1, 6.56180578347e-09; IL2RA, 1.02643912366e-07; PDGFB, 1.18423340657e-07; IL2RB, 2.76238835337e-07; IL2RG, 6.58971801631e-06; LMO4, 6.39761628149e-05; SHC1, 7.62113619067e-05; IL6, 0.000592002322468; LCK, 0.00257475730447; NTRK1, 0.00300643586…
BRAF	any non-synonymous	THCA	IL4-MEDIATED SIGNALING EVENTS	0.00638375	0.01	235	2	1	FALSE	TRUE		33	21	1	HMGA1, 2.18609482447e-19; IRS1, 5.36435633963e-15; STAT6, 4.12722888214e-13; IL13RA1, 1.36891864223e-12; IRS2, 7.5008857677e-12; BCL2L1, 2.09266008144e-11; CCL17, 3.76759182043e-11; COL1A1, 1.60135625561e-10; JAK3, 3.28659123851e-10; IL4R, 4.6872728429e-10; PARP14, 7.76220029323e-09; STAT5A, 7.92693010867e-09; DOK2, 2.06699456433e-07; IL2RG, 6.58971801631e-06; SPI1, 6.68930885049e-06; LTA, 6.9832…	TFF3, 1.3525897876e-12;
TP53	any non-synonymous	LGG	CXCR3-MEDIATED SIGNALING EVENTS	0.00187903	0.01	150	29	2	TRUE	FALSE		19	5	3	NRAS, 1.06851072904e-09; GNAI3, 6.68098770699e-09; MTOR, 8.0937782639e-07; ITGB2, 0.000558084596747; ITGAL, 0.00187902923474;	GNB1, 1.78620927521e-07;MAPK11, 0.000187449702851;RAF1, 0.00109500100271;
CIC	any non-synonymous	LGG	VALIDATED TRANSCRIPTIONAL TARGETS OF TAP63 ISOFORMS	0.000522963	0.01	30	33	1	TRUE	FALSE		24	0	4		MFGE8, 1.32567990671e-05;NOC2L, 3.65803261122e-05;ITGB4, 0.000109345277368;DHRS3, 0.000522962917424;
TP53	any non-synonymous	BRCA	HIV-1 NEF: NEGATIVE EFFECTOR OF FAS AND TNF-ALPHA	5.12176e-47	0.01	176	103	5	TRUE	FALSE		34	0	0
TP53	any non-synonymous	BRCA	SIGNALING EVENTS MEDIATED BY HEPATOCYTE GROWTH FACTOR RECEPTOR (C-MET)	5.39812e-47	0.01	176	103	5	TRUE	FALSE		79	0	0
TP53	any non-synonymous	BRCA	REGULATION OF P38-ALPHA AND P38-BETA	6.69235e-47	0.01	176	103	5	TRUE	FALSE		30	0	0
BRAF	any non-synonymous	THCA	FAS (CD95) SIGNALING PATHWAY	0.000208828	0.01	235	2	1	FALSE	TRUE		15	10	0	BID, 1.56757787591e-18; MAPK10, 1.18651580314e-12; CFLAR, 8.33822971908e-10; BIRC3, 2.81867195744e-09; FAIM2, 2.0994612075e-08; MAP2K7, 1.13372713875e-06; PIK3CD, 2.03706604208e-06; SRC, 1.86623953988e-05; PIK3R2, 2.44715338401e-05; BTK, 0.000208827918835;
BRAF	any non-synonymous	THCA	REGULATION OF NUCLEAR SMAD2/3 SIGNALING	0.00449855	0.01	235	2	1	FALSE	TRUE		25	12	0	RUNX1, 1.49385718221e-16; RUNX2, 1.76580417336e-13; MED15, 5.87441340403e-13; CBFB, 2.54577729279e-11; TGIF1, 4.79433984395e-11; GATA3, 2.18988915839e-10; CDKN2B, 2.152609321e-08; CITED1, 1.44065180128e-07; HDAC1, 2.35355150247e-05; SMAD3, 0.00017777355153; RUNX3, 0.000745094128937; COL1A2, 0.00449855070336;
BRAF	600, 601	THCA	REELIN SIGNALING PATHWAY	0.000152248	0.01	235	0	0	FALSE	TRUE		11	7	0	ITGA3, 8.66495693252e-21; FYN, 2.13191602137e-12; ARHGEF2, 3.8639143268e-08; MAP2K7, 1.13372713875e-06; ITGB1, 6.29975382958e-06; CDK5R1, 8.86335592053e-05; MAP3K11, 0.000152247967685;
TP53	any non-synonymous	BRCA	NEPHRIN/NEPH1 SIGNALING IN THE KIDNEY PODOCYTE	1.83922e-46	0.01	176	103	5	TRUE	FALSE		28	0	0
TP53	any non-synonymous	BRCA	NETRIN-MEDIATED SIGNALING EVENTS	2.03365e-46	0.01	176	103	5	TRUE	FALSE		29	0	0
BRAF	600, 601	THCA	SIGNALING EVENTS MEDIATED BY STEM CELL FACTOR RECEPTOR (C-KIT)	0.00523703	0.01	235	0	0	FALSE	TRUE		24	13	0	LYN, 7.99000433169e-14; BCL2, 2.6618493243e-12; STAT1, 6.03768775075e-12; TEC, 5.83827877409e-11; STAT3, 7.44293929193e-09; STAT5A, 7.92693010867e-09; GRB10, 9.82254981495e-08; PTPRO, 2.46476298553e-07; PIK3C2B, 1.34381227763e-06; VAV1, 6.19613347824e-05; SHC1, 7.62113619067e-05; MAP4K1, 7.79845365724e-05; GRAP2, 0.00523703385043;
CIC	any non-synonymous	LGG	STABILIZATION AND EXPANSION OF THE E-CADHERIN ADHERENS JUNCTION	3.71204e-46	0.01	30	33	1	TRUE	FALSE		21	0	0
BRAF	600, 601	THCA	SYNDECAN-3-MEDIATED SIGNALING EVENTS	2.46434e-05	0.01	235	0	0	FALSE	TRUE		7	5	0	FYN, 2.13191602137e-12; SDC3, 8.07228042521e-11; AGRP, 2.08029676281e-06; SRC, 1.86623953988e-05; APH1A, 2.4643435531e-05;
CIC	any non-synonymous	LGG	TRK RECEPTOR SIGNALING MEDIATED BY THE MAPK PATHWAY	0.00082428	0.01	30	33	1	TRUE	FALSE		16	0	4		RAP1A, 0.000138173557494;NRAS, 0.000177063877618;RIT1, 0.000572785074354;RPS6KA1, 0.000824280230758;
CDH1	any non-synonymous	BRCA	SIGNALING EVENTS MEDIATED BY HDAC CLASS II	0.0018144	0.01	19	82	3	TRUE	FALSE		32	0	7		HDAC7, 1.42204453714e-07;RAN, 3.88101086127e-07;HSP90AA1, 4.83603732539e-07;HDAC4, 0.000385102894863;YWHAB, 0.000748080474161;ANKRA2, 0.00126966778417;XPO1, 0.00181440080638;
BRAF	600, 601	THCA	AP-1 TRANSCRIPTION FACTOR NETWORK	0.00638375	0.01	235	0	0	FALSE	TRUE		27	17	0	TIMP1, 2.30756141383e-14; CSF2, 4.11486574947e-13; CBFB, 2.54577729279e-11; PLAU, 2.98997742422e-09; FOSL2, 4.06033643907e-09; TH, 2.04233885966e-07; GATA2, 1.47921354491e-06; HLA-A, 2.86197102763e-06; MMP9, 1.62405395542e-05; CCND1, 8.64451888313e-05; FOSL1, 0.000258658991222; CRTC1, 0.000393275568383; NFATC1, 0.000490051534471; IL6, 0.000592002322468; TGFB1, 0.00409495316034; COL1A2, 0.00449855…
BRAF	600, 601	THCA	THROMBOXANE A2 RECEPTOR SIGNALING	0.00405421	0.01	235	0	0	FALSE	TRUE		33	19	0	GNA14, 2.80583691497e-20; ICAM1, 1.2186898581e-15; LYN, 7.99000433169e-14; FYN, 2.13191602137e-12; PRKCE, 8.76210368612e-11; TGM2, 5.81157099859e-10; PRKCQ, 1.17666097359e-08; GNB1, 1.62203371891e-08; GNA15, 3.56327741646e-08; TBXA2R, 3.66812540944e-08; SRC, 1.86623953988e-05; GNAI2, 3.00394211669e-05; FGR, 3.13592900955e-05; PIK3R5, 0.000405252592534; PLCB2, 0.000498453625986; PRKCH, 0.000501955…
TP53	any non-synonymous	LGG	ERBB1 DOWNSTREAM SIGNALING	0.00210593	0.01	150	29	2	TRUE	FALSE		45	6	6	NRAS, 1.06851072904e-09; WASF2, 5.97208224266e-07; MTOR, 8.0937782639e-07; ABI1, 1.19304702284e-06; CDC42, 6.24331042144e-06; ARPC1B, 0.00168161607254;	RIN1, 1.00812850935e-07;DUSP6, 2.70498306313e-07;USP6NL, 5.80959323929e-06;RAF1, 0.00109500100271;F2RL2, 0.00128885635543;CREB1, 0.00210592600756;
BRAF	600, 601	THCA	CASPASE CASCADE IN APOPTOSIS	0.00126081	0.01	235	0	0	FALSE	TRUE		28	12	0	BID, 1.56757787591e-18; BCL2, 2.6618493243e-12; BCL2L1, 2.09266008144e-11; CFL2, 5.50056563645e-10; BIRC3, 2.81867195744e-09; TNFRSF10A, 3.32764829554e-09; LMNA, 8.49319994582e-09; TNFRSF1A, 3.67546900141e-08; TNFRSF10B, 0.000133154559894; NUMA1, 0.000149084097275; TOP1, 0.000314036919796; SREBF1, 0.00126081114408;
TP53	any non-synonymous	BRCA	BCR SIGNALING PATHWAY	1.10907e-45	0.01	176	103	5	TRUE	FALSE		66	0	0
TP53	any non-synonymous	BRCA	SIGNALING EVENTS MEDIATED BY PTP1B	1.30188e-45	0.01	176	103	5	TRUE	FALSE		48	0	0
BRAF	any non-synonymous	THCA	SYNDECAN-3-MEDIATED SIGNALING EVENTS	2.46434e-05	0.01	235	2	1	FALSE	TRUE		7	5	0	FYN, 2.13191602137e-12; SDC3, 8.07228042521e-11; AGRP, 2.08029676281e-06; SRC, 1.86623953988e-05; APH1A, 2.4643435531e-05;
BRAF	600, 601	THCA	P73 TRANSCRIPTION FACTOR NETWORK	0.00462167	0.01	235	0	0	FALSE	TRUE		27	21	0	SERPINA1, 6.16129481609e-21; IL1RAP, 3.2849830362e-16; SFN, 1.15279715975e-14; S100A2, 1.51200415071e-11; PEA15, 3.26557554029e-11; IL4R, 4.6872728429e-10; RELA, 1.38994730583e-09; RNF43, 4.58718174665e-09; GDF15, 5.53596467285e-09; TUBA1A, 4.02965491779e-08; PPAP2A, 6.7604918816e-07; PLK3, 2.25807020736e-06; BUB1, 2.39291086011e-06; BBC3, 2.74700316139e-06; TP63, 4.27383075751e-06; D4S234E, 3.81…
BRAF	any non-synonymous	THCA	SIGNALING EVENTS MEDIATED BY STEM CELL FACTOR RECEPTOR (C-KIT)	0.00523703	0.01	235	2	1	FALSE	TRUE		24	13	0	LYN, 7.99000433169e-14; BCL2, 2.6618493243e-12; STAT1, 6.03768775075e-12; TEC, 5.83827877409e-11; STAT3, 7.44293929193e-09; STAT5A, 7.92693010867e-09; GRB10, 9.82254981495e-08; PTPRO, 2.46476298553e-07; PIK3C2B, 1.34381227763e-06; VAV1, 6.19613347824e-05; SHC1, 7.62113619067e-05; MAP4K1, 7.79845365724e-05; GRAP2, 0.00523703385043;
PIK3CA	any non-synonymous	BRCA	MTOR SIGNALING PATHWAY	0.000901005	0.01	345	7	6	TRUE	FALSE		68	0	10		CCNE1, 7.90184005699e-07;RHEB, 1.18947324512e-06;CYCS, 2.06372078104e-06;PDCD4, 5.03548857878e-06;MAP2K1, 4.94276783593e-05;YWHAG, 5.59529163694e-05;YWHAZ, 8.76639327765e-05;RRAGD, 9.37386469169e-05;EIF4EBP1, 9.67867938653e-05;NRAS, 0.000901004775633;
TP53	any non-synonymous	UCEC	P73 TRANSCRIPTION FACTOR NETWORK	0.00212284	0.01	57	16	2	TRUE	FALSE		74	0	19		CDKN1A, 1.76313883738e-07;MDM2, 7.31623353359e-07;BAK1, 1.91268986568e-06;PLK1, 3.73784991832e-06;BUB1, 4.51547577556e-06;ADA, 1.13874350388e-05;AEN, 1.44184777048e-05;BBC3, 0.000204692848991;CCNB1, 0.000216699273931;ABL1, 0.000770092438748;TP73, 0.000985856254994;PPAP2A, 0.00116503983432;SERPINA1, 0.00118857520016;TP53AIP1, 0.00148105589947;SFN, 0.00163354953978;CDK2, 0.00174500126221;FASN, 0.00…
CIC	any non-synonymous	LGG	VALIDATED TARGETS OF C-MYC TRANSCRIPTIONAL ACTIVATION	0.00141164	0.01	30	33	1	TRUE	FALSE		35	0	5		TAF12, 1.60147561719e-05;SHMT1, 0.000108365585099;RPL11, 0.000540508605307;RUVBL2, 0.000712308110992;TERT, 0.00141164441833;
TP53	any non-synonymous	LGG	SIGNALING EVENTS MEDIATED BY HDAC CLASS I	0.000391314	0.01	150	29	2	TRUE	FALSE		26	4	3	RBBP4, 2.06029861275e-10; HDAC1, 1.63478379146e-06; SIRT2, 1.74631972282e-06; WDR77, 4.43936149187e-06;	CHD4, 1.24349438027e-05;MTA2, 1.65024781075e-05;UBE2I, 0.000391314098303;
BRAF	any non-synonymous	THCA	THROMBOXANE A2 RECEPTOR SIGNALING	0.00405421	0.01	235	2	1	FALSE	TRUE		33	19	0	GNA14, 2.80583691497e-20; ICAM1, 1.2186898581e-15; LYN, 7.99000433169e-14; FYN, 2.13191602137e-12; PRKCE, 8.76210368612e-11; TGM2, 5.81157099859e-10; PRKCQ, 1.17666097359e-08; GNB1, 1.62203371891e-08; GNA15, 3.56327741646e-08; TBXA2R, 3.66812540944e-08; SRC, 1.86623953988e-05; GNAI2, 3.00394211669e-05; FGR, 3.13592900955e-05; PIK3R5, 0.000405252592534; PLCB2, 0.000498453625986; PRKCH, 0.000501955…
TP53	any non-synonymous	LGG	MTOR SIGNALING PATHWAY	0.00204164	0.01	150	29	2	TRUE	FALSE		29	4	2	NRAS, 1.06851072904e-09; RRAGC, 1.33521943744e-07; MTOR, 8.0937782639e-07; RPS6KA1, 0.00204164382303;	PDCD4, 0.00094720027832;RAF1, 0.00109500100271;
TP53	any non-synonymous	BRCA	SIGNALING EVENTS REGULATED BY RET TYROSINE KINASE	5.91774e-45	0.01	176	103	5	TRUE	FALSE		37	0	0
BRAF	600, 601	THCA	VISUAL SIGNAL TRANSDUCTION: RODS	1.15134e-05	0.01	235	0	0	FALSE	TRUE		6	3	0	RDH5, 1.29641946771e-13; GNB1, 1.62203371891e-08; PDE6A, 1.15133882971e-05;
BRAF	any non-synonymous	THCA	REELIN SIGNALING PATHWAY	0.000152248	0.01	235	2	1	FALSE	TRUE		11	7	0	ITGA3, 8.66495693252e-21; FYN, 2.13191602137e-12; ARHGEF2, 3.8639143268e-08; MAP2K7, 1.13372713875e-06; ITGB1, 6.29975382958e-06; CDK5R1, 8.86335592053e-05; MAP3K11, 0.000152247967685;
BRAF	600, 601	THCA	EPHA FORWARD SIGNALING	0.00405421	0.01	235	0	0	FALSE	TRUE		16	11	1	NGEF, 2.68885853436e-19; LYN, 7.99000433169e-14; FYN, 2.13191602137e-12; EPHA4, 3.64377822027e-12; EPHA2, 1.21007306726e-08; EFNA1, 1.58422551044e-07; SRC, 1.86623953988e-05; FGR, 3.13592900955e-05; PIK3R5, 0.000405252592534; LCK, 0.00257475730447; PIK3R6, 0.0040542076956;	EPHA8, 2.86315872584e-05;
TP53	any non-synonymous	LGG	PLASMA MEMBRANE ESTROGEN RECEPTOR SIGNALING	0.000886703	0.01	150	29	2	TRUE	FALSE		19	4	2	NRAS, 1.06851072904e-09; GNAI3, 6.68098770699e-09; GNA15, 4.05084485271e-05; PLCB2, 0.000886703415201;	GNB1, 1.78620927521e-07;MAPK11, 0.000187449702851;
BRAF	600, 601	THCA	HIV-1 NEF: NEGATIVE EFFECTOR OF FAS AND TNF-ALPHA	1.13373e-06	0.01	235	0	0	FALSE	TRUE		14	7	0	BID, 1.56757787591e-18; BCL2, 2.6618493243e-12; CFLAR, 8.33822971908e-10; RELA, 1.38994730583e-09; TNFRSF1A, 3.67546900141e-08; MAP3K14, 5.28089531701e-07; MAP2K7, 1.13372713875e-06;
CIC	any non-synonymous	LGG	CDC42 SIGNALING EVENTS	0.000712308	0.01	30	33	1	TRUE	FALSE		31	0	6		CDC42, 1.44762671174e-05;IQGAP1, 4.0065297393e-05;PAK4, 5.41366041089e-05;MTOR, 6.39761628149e-05;TNK2, 7.96395284345e-05;ARPC1B, 0.000712308110992;
BRAF	600, 601	THCA	CIRCADIAN RHYTHM PATHWAY	2.97703e-05	0.01	235	0	0	FALSE	TRUE		3	3	0	ARNTL, 7.12565648304e-20; BHLHE40, 1.11276836167e-10; NR1D1, 2.97702793313e-05;
BRAF	any non-synonymous	THCA	AP-1 TRANSCRIPTION FACTOR NETWORK	0.00638375	0.01	235	2	1	FALSE	TRUE		27	17	0	TIMP1, 2.30756141383e-14; CSF2, 4.11486574947e-13; CBFB, 2.54577729279e-11; PLAU, 2.98997742422e-09; FOSL2, 4.06033643907e-09; TH, 2.04233885966e-07; GATA2, 1.47921354491e-06; HLA-A, 2.86197102763e-06; MMP9, 1.62405395542e-05; CCND1, 8.64451888313e-05; FOSL1, 0.000258658991222; CRTC1, 0.000393275568383; NFATC1, 0.000490051534471; IL6, 0.000592002322468; TGFB1, 0.00409495316034; COL1A2, 0.00449855…
TP53	any non-synonymous	BRCA	CELLULAR ROLES OF ANTHRAX TOXIN	1.2288e-44	0.01	176	103	5	TRUE	FALSE		19	0	0
CIC	any non-synonymous	LGG	RHOA SIGNALING PATHWAY	0.000296341	0.01	30	33	1	TRUE	FALSE		16	0	3		PKN2, 1.10951775389e-05;CDC42, 1.44762671174e-05;MSN, 0.000296340922859;
BRAF	any non-synonymous	THCA	CASPASE CASCADE IN APOPTOSIS	0.00126081	0.01	235	2	1	FALSE	TRUE		28	12	0	BID, 1.56757787591e-18; BCL2, 2.6618493243e-12; BCL2L1, 2.09266008144e-11; CFL2, 5.50056563645e-10; BIRC3, 2.81867195744e-09; TNFRSF10A, 3.32764829554e-09; LMNA, 8.49319994582e-09; TNFRSF1A, 3.67546900141e-08; TNFRSF10B, 0.000133154559894; NUMA1, 0.000149084097275; TOP1, 0.000314036919796; SREBF1, 0.00126081114408;
BRAF	any non-synonymous	THCA	P73 TRANSCRIPTION FACTOR NETWORK	0.00462167	0.01	235	2	1	FALSE	TRUE		27	21	0	SERPINA1, 6.16129481609e-21; IL1RAP, 3.2849830362e-16; SFN, 1.15279715975e-14; S100A2, 1.51200415071e-11; PEA15, 3.26557554029e-11; IL4R, 4.6872728429e-10; RELA, 1.38994730583e-09; RNF43, 4.58718174665e-09; GDF15, 5.53596467285e-09; TUBA1A, 4.02965491779e-08; PPAP2A, 6.7604918816e-07; PLK3, 2.25807020736e-06; BUB1, 2.39291086011e-06; BBC3, 2.74700316139e-06; TP63, 4.27383075751e-06; D4S234E, 3.81…
BRAF	any non-synonymous	THCA	VISUAL SIGNAL TRANSDUCTION: RODS	1.15134e-05	0.01	235	2	1	FALSE	TRUE		6	3	0	RDH5, 1.29641946771e-13; GNB1, 1.62203371891e-08; PDE6A, 1.15133882971e-05;
BRAF	600, 601	THCA	IL2 SIGNALING EVENTS MEDIATED BY PI3K	0.00257476	0.01	235	0	0	FALSE	TRUE		13	9	0	BCL2, 2.6618493243e-12; BCL2L1, 2.09266008144e-11; JAK3, 3.28659123851e-10; RELA, 1.38994730583e-09; IL2RA, 1.02643912366e-07; IL2RB, 2.76238835337e-07; IL2RG, 6.58971801631e-06; SHC1, 7.62113619067e-05; LCK, 0.00257475730447;
TP53	any non-synonymous	BRCA	ERBB2/ERBB3 SIGNALING EVENTS	6.1975e-44	0.01	176	103	5	TRUE	FALSE		43	0	0
BRAF	600, 601	THCA	SIGNALING EVENTS MEDIATED BY PTP1B	0.00275042	0.01	235	0	0	FALSE	TRUE		26	16	0	IRS1, 5.36435633963e-15; LYN, 7.99000433169e-14; FYN, 2.13191602137e-12; STAT3, 7.44293929193e-09; STAT5A, 7.92693010867e-09; PDGFB, 1.18423340657e-07; CSF1, 1.57317465498e-07; TRPV6, 1.04342707278e-06; FCGR2A, 3.45047035994e-06; SRC, 1.86623953988e-05; CAPN1, 2.21870893293e-05; FGR, 3.13592900955e-05; SHC1, 7.62113619067e-05; CSF1R, 0.00117439753388; LCK, 0.00257475730447; CSK, 0.00275042454285;
CIC	any non-synonymous	LGG	CERAMIDE SIGNALING PATHWAY	0.000951948	0.01	30	33	1	TRUE	FALSE		20	0	2		SMPD3, 0.000340873199093;BID, 0.000951948139473;
BRAF	any non-synonymous	THCA	EPHA FORWARD SIGNALING	0.00405421	0.01	235	2	1	FALSE	TRUE		16	11	1	NGEF, 2.68885853436e-19; LYN, 7.99000433169e-14; FYN, 2.13191602137e-12; EPHA4, 3.64377822027e-12; EPHA2, 1.21007306726e-08; EFNA1, 1.58422551044e-07; SRC, 1.86623953988e-05; FGR, 3.13592900955e-05; PIK3R5, 0.000405252592534; LCK, 0.00257475730447; PIK3R6, 0.0040542076956;	EPHA8, 2.86315872584e-05;
BRAF	600, 601	THCA	DEGRADATION OF BETA CATENIN	1.45222e-07	0.01	235	0	0	FALSE	TRUE		4	2	0	DVL1, 1.50145707948e-11; AXIN2, 1.45222323973e-07;
TP53	any non-synonymous	BRCA	NONCANONICAL WNT SIGNALING PATHWAY	1.34161e-43	0.01	176	103	5	TRUE	FALSE		30	0	0
BRAF	600, 601	THCA	CD40/CD40L SIGNALING	0.00036413	0.01	235	0	0	FALSE	TRUE		17	9	0	MAPK10, 1.18651580314e-12; BCL2L1, 2.09266008144e-11; JAK3, 3.28659123851e-10; RELA, 1.38994730583e-09; BIRC3, 2.81867195744e-09; STAT5A, 7.92693010867e-09; MAP3K14, 5.28089531701e-07; CD40LG, 0.000210715853065; CD40, 0.000364129858437;
BRAF	any non-synonymous	THCA	CIRCADIAN RHYTHM PATHWAY	2.97703e-05	0.01	235	2	1	FALSE	TRUE		3	3	0	ARNTL, 7.12565648304e-20; BHLHE40, 1.11276836167e-10; NR1D1, 2.97702793313e-05;
BRAF	600, 601	THCA	PAR1-MEDIATED THROMBIN SIGNALING EVENTS	0.000498454	0.01	235	0	0	FALSE	TRUE		16	8	0	GNA14, 2.80583691497e-20; TRPC6, 4.94239944031e-10; GNAZ, 1.5245217342e-08; GNB1, 1.62203371891e-08; GNA15, 3.56327741646e-08; F2RL2, 3.00093967604e-05; GNAI2, 3.00394211669e-05; PLCB2, 0.000498453625986;
TP53	any non-synonymous	BRCA	GMCSF-MEDIATED SIGNALING EVENTS	1.9903e-43	0.01	176	103	5	TRUE	FALSE		34	0	0
BRAF	any non-synonymous	THCA	HIV-1 NEF: NEGATIVE EFFECTOR OF FAS AND TNF-ALPHA	1.13373e-06	0.01	235	2	1	FALSE	TRUE		14	7	0	BID, 1.56757787591e-18; BCL2, 2.6618493243e-12; CFLAR, 8.33822971908e-10; RELA, 1.38994730583e-09; TNFRSF1A, 3.67546900141e-08; MAP3K14, 5.28089531701e-07; MAP2K7, 1.13372713875e-06;
BRAF	600, 601	THCA	IL8- AND CXCR1-MEDIATED SIGNALING EVENTS	0.00405421	0.01	235	0	0	FALSE	TRUE		14	10	0	GNA14, 2.80583691497e-20; LYN, 7.99000433169e-14; PRKCE, 8.76210368612e-11; GNB1, 1.62203371891e-08; GNA15, 3.56327741646e-08; GNAI2, 3.00394211669e-05; FGR, 3.13592900955e-05; PLCB2, 0.000498453625986; ARRB2, 0.000952900563745; PIK3R6, 0.0040542076956;
BRAF	600, 601	THCA	ALPHA4 BETA1 INTEGRIN SIGNALING EVENTS	0.0049667	0.01	235	0	0	FALSE	TRUE		14	12	0	FN1, 5.68523262738e-22; ARF6, 5.08658259358e-13; MDK, 4.09604189489e-12; PXN, 7.41448873369e-11; PTK2B, 4.70330680543e-09; IGSF8, 2.67695711324e-08; SPP1, 1.61205628216e-06; AMICA1, 2.15009184098e-06; ITGB1, 6.29975382958e-06; SRC, 1.86623953988e-05; THBS1, 0.000643235274119; ITGA4, 0.00496669822844;
BRAF	any non-synonymous	THCA	SIGNALING EVENTS MEDIATED BY PTP1B	0.00275042	0.01	235	2	1	FALSE	TRUE		26	16	0	IRS1, 5.36435633963e-15; LYN, 7.99000433169e-14; FYN, 2.13191602137e-12; STAT3, 7.44293929193e-09; STAT5A, 7.92693010867e-09; PDGFB, 1.18423340657e-07; CSF1, 1.57317465498e-07; TRPV6, 1.04342707278e-06; FCGR2A, 3.45047035994e-06; SRC, 1.86623953988e-05; CAPN1, 2.21870893293e-05; FGR, 3.13592900955e-05; SHC1, 7.62113619067e-05; CSF1R, 0.00117439753388; LCK, 0.00257475730447; CSK, 0.00275042454285;
BRAF	600, 601	THCA	RAC1 SIGNALING PATHWAY	0.000959594	0.01	235	0	0	FALSE	TRUE		13	10	0	MAP2K6, 1.69896818353e-12; BAIAP2, 2.25526128844e-09; STAT3, 7.44293929193e-09; STAT5A, 7.92693010867e-09; NCF2, 6.53178816313e-08; ARPC2, 1.33521943744e-07; MAP2K7, 1.13372713875e-06; MAP3K11, 0.000152247967685; PLCB2, 0.000498453625986; ARPC1B, 0.000959594268325;
BRAF	any non-synonymous	THCA	IL2 SIGNALING EVENTS MEDIATED BY PI3K	0.00257476	0.01	235	2	1	FALSE	TRUE		13	9	0	BCL2, 2.6618493243e-12; BCL2L1, 2.09266008144e-11; JAK3, 3.28659123851e-10; RELA, 1.38994730583e-09; IL2RA, 1.02643912366e-07; IL2RB, 2.76238835337e-07; IL2RG, 6.58971801631e-06; SHC1, 7.62113619067e-05; LCK, 0.00257475730447;
BRAF	600, 601	THCA	SYNDECAN-4-MEDIATED SIGNALING EVENTS	0.00285695	0.01	235	0	0	FALSE	TRUE		13	10	0	FN1, 5.68523262738e-22; SDC4, 3.04509370441e-18; MDK, 4.09604189489e-12; ACTN1, 2.04099211993e-11; FGF2, 1.58859651259e-10; ITGB1, 6.29975382958e-06; ADAM12, 9.18443825612e-06; MMP9, 1.62405395542e-05; THBS1, 0.000643235274119; TNFRSF13B, 0.00285695187634;
TP53	any non-synonymous	UCEC	SIGNALING EVENTS MEDIATED BY HDAC CLASS II	0.000178665	0.01	57	16	2	TRUE	FALSE		31	0	2		ESR1, 1.14169106996e-06;ANKRA2, 0.000178664645165;
TP53	any non-synonymous	BRCA	SHP2 SIGNALING	1.46317e-42	0.01	176	103	5	TRUE	FALSE		54	0	0
TP53	any non-synonymous	LGG	P73 TRANSCRIPTION FACTOR NETWORK	0.001598	0.01	150	29	2	TRUE	FALSE		34	2	4	UBE4B, 4.00388779145e-09; JAK1, 5.51521456668e-06;	AEN, 4.59255274437e-11;MAPK11, 0.000187449702851;ABL1, 0.00056032140577;GDF15, 0.00159800388576;
TP53	any non-synonymous	BRCA	CANONICAL WNT SIGNALING PATHWAY	1.81123e-42	0.01	176	103	5	TRUE	FALSE		18	0	0
BRAF	any non-synonymous	THCA	PAR1-MEDIATED THROMBIN SIGNALING EVENTS	0.000498454	0.01	235	2	1	FALSE	TRUE		16	8	0	GNA14, 2.80583691497e-20; TRPC6, 4.94239944031e-10; GNAZ, 1.5245217342e-08; GNB1, 1.62203371891e-08; GNA15, 3.56327741646e-08; F2RL2, 3.00093967604e-05; GNAI2, 3.00394211669e-05; PLCB2, 0.000498453625986;
BRAF	any non-synonymous	THCA	IL8- AND CXCR1-MEDIATED SIGNALING EVENTS	0.00405421	0.01	235	2	1	FALSE	TRUE		14	10	0	GNA14, 2.80583691497e-20; LYN, 7.99000433169e-14; PRKCE, 8.76210368612e-11; GNB1, 1.62203371891e-08; GNA15, 3.56327741646e-08; GNAI2, 3.00394211669e-05; FGR, 3.13592900955e-05; PLCB2, 0.000498453625986; ARRB2, 0.000952900563745; PIK3R6, 0.0040542076956;
BRAF	any non-synonymous	THCA	CD40/CD40L SIGNALING	0.00036413	0.01	235	2	1	FALSE	TRUE		17	9	0	MAPK10, 1.18651580314e-12; BCL2L1, 2.09266008144e-11; JAK3, 3.28659123851e-10; RELA, 1.38994730583e-09; BIRC3, 2.81867195744e-09; STAT5A, 7.92693010867e-09; MAP3K14, 5.28089531701e-07; CD40LG, 0.000210715853065; CD40, 0.000364129858437;
TP53	any non-synonymous	LGG	ERBB2/ERBB3 SIGNALING EVENTS	0.001095	0.01	150	29	2	TRUE	FALSE		18	4	2	NRAS, 1.06851072904e-09; DOCK7, 4.41980532481e-07; MTOR, 8.0937782639e-07; CDC42, 6.24331042144e-06;	CHRNA1, 2.78131952666e-05;RAF1, 0.00109500100271;
CDH1	any non-synonymous	BRCA	SIGNALING EVENTS MEDIATED BY HDAC CLASS I	0.000385103	0.01	19	82	3	TRUE	FALSE		63	0	7		HDAC7, 1.42204453714e-07;RAN, 3.88101086127e-07;SSPO, 5.16812812398e-06;HDAC2, 0.000104533809814;WDR77, 0.000157513403773;SIN3B, 0.000163941647726;HDAC4, 0.000385102894863;
BRAF	600, 601	THCA	ALK2 SIGNALING EVENTS	3.15349e-06	0.01	235	0	0	FALSE	TRUE		3	2	0	ACVR1, 1.26379205266e-19; BMP7, 3.1534924658e-06;
BRAF	600, 601	THCA	TGF-BETA RECEPTOR SIGNALING	0.0048781	0.01	235	0	0	FALSE	TRUE		15	12	0	TGFBR1, 7.48916372328e-23; SPTBN1, 1.23503048126e-07; SMURF1, 2.20893513041e-06; TGFB2, 6.31236594515e-06; BAMBI, 3.9666641023e-05; SHC1, 7.62113619067e-05; SMAD3, 0.00017777355153; ARRB2, 0.000952900563745; TGFBR2, 0.0028285247302; TGFB1, 0.00409495316034; PML, 0.00462166615173; TGFB3, 0.00487809745945;
BRAF	600, 601	THCA	EPHB FORWARD SIGNALING	0.00037447	0.01	235	0	0	FALSE	TRUE		13	7	0	GRB7, 6.63840713809e-22; EPHB3, 6.41806561925e-19; PXN, 7.41448873369e-11; SRC, 1.86623953988e-05; SHC1, 7.62113619067e-05; MAP4K4, 0.000310912200235; RRAS, 0.000374469574986;
BRAF	any non-synonymous	THCA	ALPHA4 BETA1 INTEGRIN SIGNALING EVENTS	0.0049667	0.01	235	2	1	FALSE	TRUE		14	12	0	FN1, 5.68523262738e-22; ARF6, 5.08658259358e-13; MDK, 4.09604189489e-12; PXN, 7.41448873369e-11; PTK2B, 4.70330680543e-09; IGSF8, 2.67695711324e-08; SPP1, 1.61205628216e-06; AMICA1, 2.15009184098e-06; ITGB1, 6.29975382958e-06; SRC, 1.86623953988e-05; THBS1, 0.000643235274119; ITGA4, 0.00496669822844;
TP53	any non-synonymous	LGG	VALIDATED TARGETS OF C-MYC TRANSCRIPTIONAL ACTIVATION	0.000685748	0.01	150	29	2	TRUE	FALSE		35	5	3	RPL11, 1.04500442089e-12; TAF12, 1.85801842694e-06; SHMT1, 0.000100134127068; HMGA1, 0.000223298749327; SMAD3, 0.000685748236354;	TERT, 9.89081163922e-13;BMI1, 8.0165692654e-06;RUVBL2, 0.000616778866151;
BRAF	600, 601	THCA	P38 SIGNALING MEDIATED BY MAPKAP KINASES	0.00216573	0.01	235	0	0	FALSE	TRUE		8	6	0	SFN, 1.15279715975e-14; MAPKAPK3, 1.38463424667e-11; TH, 2.04233885966e-07; CDC25B, 2.1003324694e-07; LSP1, 6.51762833826e-06; ETV1, 0.00216572521788;
CIC	any non-synonymous	LGG	EPHB FORWARD SIGNALING	0.000177064	0.01	30	33	1	TRUE	FALSE		17	0	3		CDC42, 1.44762671174e-05;RAP1A, 0.000138173557494;NRAS, 0.000177063877618;
BRAF	any non-synonymous	THCA	DEGRADATION OF BETA CATENIN	1.45222e-07	0.01	235	2	1	FALSE	TRUE		4	2	0	DVL1, 1.50145707948e-11; AXIN2, 1.45222323973e-07;
TP53	any non-synonymous	BRCA	LPA4-MEDIATED SIGNALING EVENTS	5.92554e-42	0.01	176	103	5	TRUE	FALSE		12	0	0
BRAF	any non-synonymous	THCA	ALK2 SIGNALING EVENTS	3.15349e-06	0.01	235	2	1	FALSE	TRUE		3	2	0	ACVR1, 1.26379205266e-19; BMP7, 3.1534924658e-06;
TP53	any non-synonymous	BRCA	CALCIUM SIGNALING IN THE CD4+ TCR PATHWAY	7.18602e-42	0.01	176	103	5	TRUE	FALSE		26	0	0
BRAF	any non-synonymous	THCA	RAC1 SIGNALING PATHWAY	0.000959594	0.01	235	2	1	FALSE	TRUE		13	10	0	MAP2K6, 1.69896818353e-12; BAIAP2, 2.25526128844e-09; STAT3, 7.44293929193e-09; STAT5A, 7.92693010867e-09; NCF2, 6.53178816313e-08; ARPC2, 1.33521943744e-07; MAP2K7, 1.13372713875e-06; MAP3K11, 0.000152247967685; PLCB2, 0.000498453625986; ARPC1B, 0.000959594268325;
BRAF	600, 601	THCA	AMB2 INTEGRIN SIGNALING	0.00426207	0.01	235	0	0	FALSE	TRUE		25	17	0	ICAM1, 1.2186898581e-15; MST1R, 2.25058751952e-14; LYN, 7.99000433169e-14; FYN, 2.13191602137e-12; PLAUR, 1.24340169984e-10; LRP1, 1.54318880772e-10; PLAU, 2.98997742422e-09; ITGB2, 1.58739713202e-07; ITGAM, 2.04029754163e-07; MMP9, 1.62405395542e-05; SRC, 1.86623953988e-05; SELPLG, 2.75639995719e-05; FGR, 3.13592900955e-05; JAM3, 4.13267734697e-05; IL6, 0.000592002322468; LCK, 0.00257475730447; …
TP53	any non-synonymous	BRCA	STABILIZATION AND EXPANSION OF THE E-CADHERIN ADHERENS JUNCTION	8.83879e-42	0.01	176	103	5	TRUE	FALSE		40	0	0
BRAF	any non-synonymous	THCA	SYNDECAN-4-MEDIATED SIGNALING EVENTS	0.00285695	0.01	235	2	1	FALSE	TRUE		13	10	0	FN1, 5.68523262738e-22; SDC4, 3.04509370441e-18; MDK, 4.09604189489e-12; ACTN1, 2.04099211993e-11; FGF2, 1.58859651259e-10; ITGB1, 6.29975382958e-06; ADAM12, 9.18443825612e-06; MMP9, 1.62405395542e-05; THBS1, 0.000643235274119; TNFRSF13B, 0.00285695187634;
CDH1	any non-synonymous	BRCA	VALIDATED TARGETS OF C-MYC TRANSCRIPTIONAL ACTIVATION	0.00208289	0.01	19	82	3	TRUE	FALSE		75	0	17		HSPD1, 1.76696933152e-09;ACTL6A, 7.74990623012e-08;LDHA, 3.2841098824e-07;PDCD10, 3.59338857819e-07;HSP90AA1, 4.83603732539e-07;BIRC5, 4.37764346522e-06;CDC25A, 1.76636800702e-05;RCC1, 2.01159002179e-05;MTDH, 7.99587245148e-05;NCL, 8.1167145885e-05;MYCT1, 0.000257368924121;CCNB1, 0.000355850449873;RUVBL1, 0.000379749018913;TK1, 0.000506493027709;ENO1, 0.00101689643594;NME1, 0.00105206539926;EIF4A…
TP53	any non-synonymous	LGG	NOTCH-MEDIATED HES/HEY NETWORK	0.00184366	0.01	150	29	2	TRUE	FALSE		28	10	0	KDM1A, 1.070570091e-14; SPEN, 3.01575716084e-10; HDAC1, 1.63478379146e-06; AR, 9.21203294222e-06; GHR, 4.40581590614e-05; CD4, 0.00039209750965; MAML2, 0.000546487020969; TLE1, 0.000956719799379; RUNX2, 0.00169512295662; ID1, 0.00184366470618;
CIC	any non-synonymous	LGG	C-MYB TRANSCRIPTION FACTOR NETWORK	0.000505481	0.01	30	33	1	TRUE	FALSE		38	0	4		IQGAP1, 4.0065297393e-05;SKI, 0.000136935574756;NRAS, 0.000177063877618;MAF, 0.000505481053964;
TP53	any non-synonymous	BRCA	TRAIL SIGNALING PATHWAY	2.13178e-41	0.01	176	103	5	TRUE	FALSE		27	0	0
BRAF	any non-synonymous	THCA	P38 SIGNALING MEDIATED BY MAPKAP KINASES	0.00216573	0.01	235	2	1	FALSE	TRUE		8	6	0	SFN, 1.15279715975e-14; MAPKAPK3, 1.38463424667e-11; TH, 2.04233885966e-07; CDC25B, 2.1003324694e-07; LSP1, 6.51762833826e-06; ETV1, 0.00216572521788;
TP53	any non-synonymous	BRCA	ARF1 PATHWAY	2.23756e-41	0.01	176	103	5	TRUE	FALSE		18	0	0
TP53	any non-synonymous	BRCA	CXCR3-MEDIATED SIGNALING EVENTS	2.40234e-41	0.01	176	103	5	TRUE	FALSE		41	0	0
CIC	any non-synonymous	LGG	DIRECT P53 EFFECTORS	0.000498454	0.01	30	33	1	TRUE	FALSE		63	0	4		NFYC, 9.18443825612e-06;PRMT1, 0.000312783281066;SCN3B, 0.00035799197071;CASP1, 0.000498453625986;
TP53	any non-synonymous	BRCA	FGF SIGNALING PATHWAY	3.0076e-41	0.01	176	103	5	TRUE	FALSE		52	0	0
TP53	any non-synonymous	LGG	PDGFR-BETA SIGNALING PATHWAY	0.00207457	0.01	150	29	2	TRUE	FALSE		60	9	7	NRAS, 1.06851072904e-09; WASF2, 5.97208224266e-07; ABI1, 1.19304702284e-06; S1PR1, 3.51314117162e-06; RAP1A, 2.54193465162e-05; PIK3R5, 0.000647753717138; ARPC1B, 0.00168161607254; SIPA1, 0.00172763820954; PIK3CG, 0.00207457285397;	GRB10, 3.74660812225e-10;USP6NL, 5.80959323929e-06;CSK, 1.78233707209e-05;ARHGAP35, 3.36330951857e-05;SLC9A3R2, 0.000179022332023;ABL1, 0.00056032140577;RAF1, 0.00109500100271;
BRAF	any non-synonymous	THCA	EPHB FORWARD SIGNALING	0.00037447	0.01	235	2	1	FALSE	TRUE		13	7	0	GRB7, 6.63840713809e-22; EPHB3, 6.41806561925e-19; PXN, 7.41448873369e-11; SRC, 1.86623953988e-05; SHC1, 7.62113619067e-05; MAP4K4, 0.000310912200235; RRAS, 0.000374469574986;
BRAF	600, 601	THCA	NETRIN-MEDIATED SIGNALING EVENTS	0.000985856	0.01	235	0	0	FALSE	TRUE		11	4	0	ELMO1, 5.94242183664e-19; FYN, 2.13191602137e-12; UNC5B, 3.37398875392e-07; DAPK1, 0.000985856254994;
BRAF	600, 601	THCA	SIGNALING MEDIATED BY P38-ALPHA AND P38-BETA	1.38463e-11	0.01	235	0	0	FALSE	TRUE		6	2	0	KRT19, 1.4760380248e-16; MAPKAPK3, 1.38463424667e-11;
BRAF	any non-synonymous	THCA	TGF-BETA RECEPTOR SIGNALING	0.0048781	0.01	235	2	1	FALSE	TRUE		15	12	0	TGFBR1, 7.48916372328e-23; SPTBN1, 1.23503048126e-07; SMURF1, 2.20893513041e-06; TGFB2, 6.31236594515e-06; BAMBI, 3.9666641023e-05; SHC1, 7.62113619067e-05; SMAD3, 0.00017777355153; ARRB2, 0.000952900563745; TGFBR2, 0.0028285247302; TGFB1, 0.00409495316034; PML, 0.00462166615173; TGFB3, 0.00487809745945;
BRAF	600, 601	THCA	REGULATION OF P38-ALPHA AND P38-BETA	0.00635191	0.01	235	0	0	FALSE	TRUE		13	10	0	LYN, 7.99000433169e-14; MAP2K6, 1.69896818353e-12; FYN, 2.13191602137e-12; CCM2, 1.06877224807e-06; SRC, 1.86623953988e-05; FGR, 3.13592900955e-05; MAP3K3, 7.43296966768e-05; LCK, 0.00257475730447; MAP3K12, 0.00370156342975; DUSP1, 0.00635190824626;
BRAF	600, 601	THCA	E2F TRANSCRIPTION FACTOR NETWORK	0.0019266	0.01	235	0	0	FALSE	TRUE		17	8	0	PLAU, 2.98997742422e-09; CDC25A, 1.43633632234e-07; CCND3, 2.96687899828e-06; RANBP1, 1.08429007596e-05; HDAC1, 2.35355150247e-05; TP73, 0.000860497368864; CDKN2C, 0.00111154982362; RRM2, 0.00192659708629;
TP53	any non-synonymous	LGG	SIGNALING EVENTS REGULATED BY RET TYROSINE KINASE	2.54193e-05	0.01	150	29	2	TRUE	FALSE		16	1	1	RAP1A, 2.54193465162e-05;	GRB10, 3.74660812225e-10;
BRAF	any non-synonymous	THCA	AMB2 INTEGRIN SIGNALING	0.00426207	0.01	235	2	1	FALSE	TRUE		25	17	0	ICAM1, 1.2186898581e-15; MST1R, 2.25058751952e-14; LYN, 7.99000433169e-14; FYN, 2.13191602137e-12; PLAUR, 1.24340169984e-10; LRP1, 1.54318880772e-10; PLAU, 2.98997742422e-09; ITGB2, 1.58739713202e-07; ITGAM, 2.04029754163e-07; MMP9, 1.62405395542e-05; SRC, 1.86623953988e-05; SELPLG, 2.75639995719e-05; FGR, 3.13592900955e-05; JAM3, 4.13267734697e-05; IL6, 0.000592002322468; LCK, 0.00257475730447; …
BRAF	600, 601	THCA	NECTIN ADHESION PATHWAY	1.86624e-05	0.01	235	0	0	FALSE	TRUE		9	6	0	CLDN1, 4.07730415186e-11; F11R, 1.70378275646e-10; PDGFB, 1.18423340657e-07; PTPRM, 7.56926259308e-07; PVRL3, 1.39783619358e-05; SRC, 1.86623953988e-05;
TP53	any non-synonymous	BRCA	TRK RECEPTOR SIGNALING MEDIATED BY THE MAPK PATHWAY	1.04049e-40	0.01	176	103	5	TRUE	FALSE		32	0	0
TP53	any non-synonymous	BRCA	RHOA SIGNALING PATHWAY	1.20675e-40	0.01	176	103	5	TRUE	FALSE		42	0	0
TP53	any non-synonymous	LGG	TRK RECEPTOR SIGNALING MEDIATED BY THE MAPK PATHWAY	0.00210593	0.01	150	29	2	TRUE	FALSE		16	4	3	NRAS, 1.06851072904e-09; RIT1, 3.9334250407e-06; RAP1A, 2.54193465162e-05; RPS6KA1, 0.00204164382303;	RIT2, 8.20788806441e-07;RAF1, 0.00109500100271;CREB1, 0.00210592600756;
BRAF	any non-synonymous	THCA	NETRIN-MEDIATED SIGNALING EVENTS	0.000985856	0.01	235	2	1	FALSE	TRUE		11	4	0	ELMO1, 5.94242183664e-19; FYN, 2.13191602137e-12; UNC5B, 3.37398875392e-07; DAPK1, 0.000985856254994;
TP53	any non-synonymous	BRCA	CANONICAL NF-KAPPAB PATHWAY	2.56578e-40	0.01	176	103	5	TRUE	FALSE		22	0	0
CIC	any non-synonymous	LGG	REGULATION OF NUCLEAR SMAD2/3 SIGNALING	0.000936838	0.01	30	33	1	TRUE	FALSE		41	0	10		SNIP1, 4.95556188021e-06;HDAC1, 1.06921578117e-05;RBBP4, 4.37070998979e-05;TGIF1, 5.53408070626e-05;SKI, 0.000136935574756;AR, 0.000185770224515;ZBTB17, 0.000299618667555;ITGB5, 0.000360867392828;RUNX2, 0.000577385733047;CDK2, 0.000936838171331;
CDH1	any non-synonymous	BRCA	P38 SIGNALING MEDIATED BY MAPKAP KINASES	0.0025263	0.01	19	82	3	TRUE	FALSE		19	0	6		YWHAZ, 3.29727262988e-07;YWHAG, 3.06335450185e-06;YWHAQ, 0.000475092992218;LSP1, 0.000629868179098;YWHAB, 0.000748080474161;CDC25B, 0.00252629872993;
TP53	any non-synonymous	BRCA	INTERNALIZATION OF ERBB1	3.60466e-40	0.01	176	103	5	TRUE	FALSE		39	0	0
BRAF	any non-synonymous	THCA	REGULATION OF P38-ALPHA AND P38-BETA	0.00635191	0.01	235	2	1	FALSE	TRUE		13	10	0	LYN, 7.99000433169e-14; MAP2K6, 1.69896818353e-12; FYN, 2.13191602137e-12; CCM2, 1.06877224807e-06; SRC, 1.86623953988e-05; FGR, 3.13592900955e-05; MAP3K3, 7.43296966768e-05; LCK, 0.00257475730447; MAP3K12, 0.00370156342975; DUSP1, 0.00635190824626;
BRAF	any non-synonymous	THCA	SIGNALING MEDIATED BY P38-ALPHA AND P38-BETA	1.38463e-11	0.01	235	2	1	FALSE	TRUE		6	2	0	KRT19, 1.4760380248e-16; MAPKAPK3, 1.38463424667e-11;
TP53	any non-synonymous	LGG	IGF1 PATHWAY	0.001095	0.01	150	29	2	TRUE	FALSE		15	1	2	PRKD1, 0.000426883250566;	GRB10, 3.74660812225e-10;RAF1, 0.00109500100271;
CIC	any non-synonymous	LGG	E-CADHERIN SIGNALING IN THE NASCENT ADHERENS JUNCTION	0.000138174	0.01	30	33	1	TRUE	FALSE		18	0	4		CDC42, 1.44762671174e-05;WASF2, 2.24549382808e-05;IQGAP1, 4.0065297393e-05;RAP1A, 0.000138173557494;
BRAF	any non-synonymous	THCA	NECTIN ADHESION PATHWAY	1.86624e-05	0.01	235	2	1	FALSE	TRUE		9	6	0	CLDN1, 4.07730415186e-11; F11R, 1.70378275646e-10; PDGFB, 1.18423340657e-07; PTPRM, 7.56926259308e-07; PVRL3, 1.39783619358e-05; SRC, 1.86623953988e-05;
BRAF	600, 601	THCA	SYNDECAN-1-MEDIATED SIGNALING EVENTS	0.00449855	0.01	235	0	0	FALSE	TRUE		26	14	2	MET, 8.83482996419e-20; COL8A2, 8.28288470393e-14; MMP7, 1.09291772287e-10; COL1A1, 1.60135625561e-10; COL7A1, 3.16798472079e-07; COL3A1, 1.84875152138e-06; COL16A1, 2.60520289249e-06; COL11A2, 3.85553800645e-06; MMP9, 1.62405395542e-05; COL5A1, 0.000168596883019; COL4A1, 0.000447425730225; COL6A3, 0.000692640120707; TGFB1, 0.00409495316034; COL1A2, 0.00449855070336;	COL9A3, 7.93156945704e-10;COL9A1, 4.76682633053e-08;
TP53	any non-synonymous	BRCA	TGF-BETA RECEPTOR SIGNALING	6.61287e-40	0.01	176	103	5	TRUE	FALSE		53	0	0
BRAF	any non-synonymous	THCA	E2F TRANSCRIPTION FACTOR NETWORK	0.0019266	0.01	235	2	1	FALSE	TRUE		17	8	0	PLAU, 2.98997742422e-09; CDC25A, 1.43633632234e-07; CCND3, 2.96687899828e-06; RANBP1, 1.08429007596e-05; HDAC1, 2.35355150247e-05; TP73, 0.000860497368864; CDKN2C, 0.00111154982362; RRM2, 0.00192659708629;
TP53	any non-synonymous	UCEC	REGULATION OF RETINOBLASTOMA PROTEIN	0.0020725	0.01	57	16	2	TRUE	FALSE		59	0	14		E2F1, 1.03675500836e-07;CDKN1A, 1.76313883738e-07;CCNE1, 1.92532666791e-07;CDKN2A, 5.90084553086e-07;MDM2, 7.31623353359e-07;SUV39H1, 1.71245063587e-05;E2F2, 0.0002457981223;CEBPB, 0.000499951232149;ABL1, 0.000770092438748;CCND3, 0.000908241723031;CEBPA, 0.00115344749428;HDAC1, 0.00148847972306;CDK2, 0.00174500126221;CCNA2, 0.00207249931805;
CIC	any non-synonymous	LGG	BMP RECEPTOR SIGNALING	0.000371114	0.01	30	33	1	TRUE	FALSE		13	0	5		BMP2, 1.86437423315e-05;NOG, 3.78076157789e-05;RGMB, 0.000118097500412;SKI, 0.000136935574756;BMP7, 0.000371114469433;
TP53	any non-synonymous	BRCA	IFN-GAMMA PATHWAY	3.84809e-39	0.01	176	103	5	TRUE	FALSE		40	0	0
CDH1	any non-synonymous	BRCA	ALPHAE BETA7 INTEGRIN CELL SURFACE INTERACTIONS	1.79564e-16	0.01	19	82	3	TRUE	FALSE		2	0	1		CDH1, 1.79563997046e-16;
BRAF	600, 601	THCA	UROKINASE-TYPE PLASMINOGEN ACTIVATOR (UPA) AND UPAR-MEDIATED SIGNALING	0.00409495	0.01	235	0	0	FALSE	TRUE		17	12	0	FN1, 5.68523262738e-22; ITGA3, 8.66495693252e-21; PLAUR, 1.24340169984e-10; LRP1, 1.54318880772e-10; PLAU, 2.98997742422e-09; ITGB2, 1.58739713202e-07; ITGAM, 2.04029754163e-07; ITGB1, 6.29975382958e-06; FPR3, 7.74858741689e-06; MMP9, 1.62405395542e-05; SRC, 1.86623953988e-05; TGFB1, 0.00409495316034;
BRAF	600, 601	THCA	TRK RECEPTOR SIGNALING MEDIATED BY THE MAPK PATHWAY	8.86336e-05	0.01	235	0	0	FALSE	TRUE		5	4	0	MAP2K6, 1.69896818353e-12; ELK1, 1.73299466099e-10; MAPK7, 6.83126970833e-06; CDK5R1, 8.86335592053e-05;
BRAF	any non-synonymous	THCA	SYNDECAN-1-MEDIATED SIGNALING EVENTS	0.00449855	0.01	235	2	1	FALSE	TRUE		26	14	2	MET, 8.83482996419e-20; COL8A2, 8.28288470393e-14; MMP7, 1.09291772287e-10; COL1A1, 1.60135625561e-10; COL7A1, 3.16798472079e-07; COL3A1, 1.84875152138e-06; COL16A1, 2.60520289249e-06; COL11A2, 3.85553800645e-06; MMP9, 1.62405395542e-05; COL5A1, 0.000168596883019; COL4A1, 0.000447425730225; COL6A3, 0.000692640120707; TGFB1, 0.00409495316034; COL1A2, 0.00449855070336;	COL9A3, 7.93156945704e-10;COL9A1, 4.76682633053e-08;
CIC	any non-synonymous	LGG	REGULATION OF RETINOBLASTOMA PROTEIN	0.00137817	0.01	30	33	1	TRUE	FALSE		33	0	5		HDAC1, 1.06921578117e-05;RBBP4, 4.37070998979e-05;RUNX2, 0.000577385733047;CDK2, 0.000936838171331;TGFB2, 0.00137816827288;
CIC	any non-synonymous	LGG	CXCR4-MEDIATED SIGNALING EVENTS	0.00169512	0.01	30	33	1	TRUE	FALSE		53	0	10		CDC42, 1.44762671174e-05;RHOC, 3.47615036656e-05;GNAI3, 3.62525802459e-05;MTOR, 6.39761628149e-05;GNB1, 6.62549751045e-05;BLK, 0.000120122320122;ARRB2, 0.000638748349757;INPP5D, 0.00106370200264;PTPN6, 0.00116038898289;PIK3CG, 0.00169512295662;
TP53	any non-synonymous	LGG	DIRECT P53 EFFECTORS	0.00269058	0.01	150	29	2	TRUE	FALSE		63	10	7	POU4F1, 3.62047853439e-13; NFYC, 6.46789643667e-10; VCAN, 9.69403315878e-06; BCL6, 7.41811858438e-05; TP53INP1, 0.000104116509731; E2F2, 0.000144967641865; PYCARD, 0.00047083633896; IRF5, 0.00139759832169; CASP1, 0.00159321705794; FOXA1, 0.00269057595129;	TNFRSF10B, 2.5833723323e-07;PRMT1, 1.30463781384e-05;PPP1R13B, 3.89590290973e-05;TGFA, 6.7796499103e-05;DGCR8, 0.00022041465283;GDF15, 0.00159800388576;SCN3B, 0.00169681892742;
TP53	any non-synonymous	BRCA	IL4-MEDIATED SIGNALING EVENTS	1.70649e-38	0.01	176	103	5	TRUE	FALSE		53	0	0
TP53	any non-synonymous	BRCA	SIGNALING EVENTS MEDIATED BY STEM CELL FACTOR RECEPTOR (C-KIT)	2.00956e-38	0.01	176	103	5	TRUE	FALSE		50	0	0
BRAF	600, 601	THCA	E-CADHERIN SIGNALING IN THE NASCENT ADHERENS JUNCTION	8.64452e-05	0.01	235	0	0	FALSE	TRUE		9	7	0	ARF6, 5.08658259358e-13; CTTN, 1.05445191062e-12; JUP, 3.28274756484e-08; TIAM1, 9.64732566665e-08; SRC, 1.86623953988e-05; ITGB7, 5.32240604372e-05; CCND1, 8.64451888313e-05;
TP53	any non-synonymous	LGG	C-MYB TRANSCRIPTION FACTOR NETWORK	0.00292635	0.01	150	29	2	TRUE	FALSE		38	4	8	NRAS, 1.06851072904e-09; MAF, 2.70722862755e-05; SPI1, 0.000195685848185; CD4, 0.00039209750965;	PAX5, 1.32303119649e-05;ATP2B1, 4.01455081718e-05;NLK, 4.27133090047e-05;TRIM28, 0.000158302942995;UBE2I, 0.000391314098303;KITLG, 0.000703108035606;SKI, 0.0020233514677;MPO, 0.00292634814561;
CIC	any non-synonymous	LGG	SYNDECAN-2-MEDIATED SIGNALING EVENTS	2.74761e-38	0.01	30	33	1	TRUE	FALSE		18	0	0
TP53	any non-synonymous	BRCA	PLASMA MEMBRANE ESTROGEN RECEPTOR SIGNALING	5.15383e-38	0.01	176	103	5	TRUE	FALSE		39	0	0
TP53	any non-synonymous	LGG	FOXA2 AND FOXA3 TRANSCRIPTION FACTOR NETWORKS	0.00269058	0.01	150	29	2	TRUE	FALSE		20	3	4	ACADM, 7.61036061669e-06; UCP2, 0.00100980301682; FOXA1, 0.00269057595129;	HMGCS1, 3.10783227343e-05;BDH1, 3.25087914193e-05;ABCC8, 0.000132888516905;CREB1, 0.00210592600756;
TP53	any non-synonymous	LGG	SIGNALING EVENTS MEDIATED BY HEPATOCYTE GROWTH FACTOR RECEPTOR (C-MET)	0.0024321	0.01	150	29	2	TRUE	FALSE		38	7	5	MTOR, 8.0937782639e-07; CDC42, 6.24331042144e-06; RIN2, 7.87356194568e-06; RAP1A, 2.54193465162e-05; INPPL1, 6.20853814573e-05; INPP5D, 0.000153011113799; PAK4, 0.000207578702718;	GAB2, 0.000131172146764;AKT2, 0.000976046821357;RAF1, 0.00109500100271;F2RL2, 0.00128885635543;AKT1S1, 0.00243210047986;
BRAF	any non-synonymous	THCA	UROKINASE-TYPE PLASMINOGEN ACTIVATOR (UPA) AND UPAR-MEDIATED SIGNALING	0.00409495	0.01	235	2	1	FALSE	TRUE		17	12	0	FN1, 5.68523262738e-22; ITGA3, 8.66495693252e-21; PLAUR, 1.24340169984e-10; LRP1, 1.54318880772e-10; PLAU, 2.98997742422e-09; ITGB2, 1.58739713202e-07; ITGAM, 2.04029754163e-07; ITGB1, 6.29975382958e-06; FPR3, 7.74858741689e-06; MMP9, 1.62405395542e-05; SRC, 1.86623953988e-05; TGFB1, 0.00409495316034;
BRAF	600, 601	THCA	IL2 SIGNALING EVENTS MEDIATED BY STAT5	0.00257476	0.01	235	0	0	FALSE	TRUE		16	12	0	BCL2, 2.6618493243e-12; BCL2L1, 2.09266008144e-11; JAK3, 3.28659123851e-10; STAT5A, 7.92693010867e-09; FOXP3, 1.44498024611e-07; IL2RB, 2.76238835337e-07; CCND3, 2.96687899828e-06; IL2RG, 6.58971801631e-06; LTA, 6.98322299938e-06; SHC1, 7.62113619067e-05; CDK6, 0.000208619195295; LCK, 0.00257475730447;
BRAF	600, 601	THCA	IL8- AND CXCR2-MEDIATED SIGNALING EVENTS	0.00405421	0.01	235	0	0	FALSE	TRUE		17	13	0	GNA14, 2.80583691497e-20; ELMO1, 5.94242183664e-19; RAC2, 8.31670245683e-09; GNB1, 1.62203371891e-08; GNA15, 3.56327741646e-08; VASP, 2.95085704226e-07; GNAI2, 3.00394211669e-05; FGR, 3.13592900955e-05; DOCK2, 5.20659173925e-05; PLCB2, 0.000498453625986; ARRB2, 0.000952900563745; CXCR2, 0.00298546429954; PIK3R6, 0.0040542076956;
TP53	any non-synonymous	BRCA	IL1-MEDIATED SIGNALING EVENTS	8.9542e-38	0.01	176	103	5	TRUE	FALSE		32	0	0
CDH1	any non-synonymous	BRCA	CLASS I PI3K SIGNALING EVENTS MEDIATED BY AKT	0.00216356	0.01	19	82	3	TRUE	FALSE		34	0	10		YWHAZ, 3.29727262988e-07;HSP90AA1, 4.83603732539e-07;YWHAG, 3.06335450185e-06;KPNA1, 8.99730839127e-05;PRKDC, 0.000190473020138;YWHAQ, 0.000475092992218;GSK3B, 0.000674189047821;YWHAB, 0.000748080474161;FOXO4, 0.000777831996428;SLC2A4, 0.00216356057517;
BRAF	600, 601	THCA	IL3-MEDIATED SIGNALING EVENTS	0.00633288	0.01	235	0	0	FALSE	TRUE		12	8	0	BCL2L1, 2.09266008144e-11; STAT5A, 7.92693010867e-09; CSF2RB, 5.86798062204e-06; HDAC1, 2.35355150247e-05; ID1, 2.6115018178e-05; SHC1, 7.62113619067e-05; OSM, 0.000668817052072; INPP5D, 0.00633288107655;
BRAF	any non-synonymous	THCA	E-CADHERIN SIGNALING IN THE NASCENT ADHERENS JUNCTION	8.64452e-05	0.01	235	2	1	FALSE	TRUE		9	7	0	ARF6, 5.08658259358e-13; CTTN, 1.05445191062e-12; JUP, 3.28274756484e-08; TIAM1, 9.64732566665e-08; SRC, 1.86623953988e-05; ITGB7, 5.32240604372e-05; CCND1, 8.64451888313e-05;
CIC	any non-synonymous	LGG	P73 TRANSCRIPTION FACTOR NETWORK	1.5988e-37	0.01	30	33	1	TRUE	FALSE		34	0	0
BRAF	any non-synonymous	THCA	IL2 SIGNALING EVENTS MEDIATED BY STAT5	0.00257476	0.01	235	2	1	FALSE	TRUE		16	12	0	BCL2, 2.6618493243e-12; BCL2L1, 2.09266008144e-11; JAK3, 3.28659123851e-10; STAT5A, 7.92693010867e-09; FOXP3, 1.44498024611e-07; IL2RB, 2.76238835337e-07; CCND3, 2.96687899828e-06; IL2RG, 6.58971801631e-06; LTA, 6.98322299938e-06; SHC1, 7.62113619067e-05; CDK6, 0.000208619195295; LCK, 0.00257475730447;
BRAF	600, 601	THCA	CALCIUM SIGNALING IN THE CD4+ TCR PATHWAY	0.00409905	0.01	235	0	0	FALSE	TRUE		14	8	0	CSF2, 4.11486574947e-13; BATF3, 2.97629948096e-08; IL2RA, 1.02643912366e-07; PPP3CA, 0.000191236438036; CD40LG, 0.000210715853065; FOSL1, 0.000258658991222; NFATC1, 0.000490051534471; CREM, 0.00409905016166;
TP53	any non-synonymous	UCEC	VALIDATED TRANSCRIPTIONAL TARGETS OF TAP63 ISOFORMS	0.00230195	0.01	57	16	2	TRUE	FALSE		52	0	15		SPATA18, 7.92229347397e-08;CDKN1A, 1.76313883738e-07;CDKN2A, 5.90084553086e-07;MDM2, 7.31623353359e-07;PLK1, 3.73784991832e-06;ADA, 1.13874350388e-05;AEN, 1.44184777048e-05;BBC3, 0.000204692848991;ABL1, 0.000770092438748;FDXR, 0.00082181109562;GPX2, 0.000894719765403;SHH, 0.00113627489832;PERP, 0.00132412952196;NQO1, 0.00199522191348;NOC2L, 0.00230194698252;
CDH1	any non-synonymous	BRCA	AURORA A SIGNALING	0.0025263	0.01	19	82	3	TRUE	FALSE		30	0	11		RAN, 3.88101086127e-07;AURKA, 8.15063347282e-07;CKAP5, 1.84690369392e-06;BIRC5, 4.37764346522e-06;TPX2, 6.71611967178e-06;CENPA, 8.55495423618e-06;DLGAP5, 3.08615341205e-05;AURKB, 0.000134089911725;GSK3B, 0.000674189047821;CPEB1, 0.00237917854509;CDC25B, 0.00252629872993;
BRAF	any non-synonymous	THCA	TRK RECEPTOR SIGNALING MEDIATED BY THE MAPK PATHWAY	8.86336e-05	0.01	235	2	1	FALSE	TRUE		5	4	0	MAP2K6, 1.69896818353e-12; ELK1, 1.73299466099e-10; MAPK7, 6.83126970833e-06; CDK5R1, 8.86335592053e-05;
CIC	any non-synonymous	LGG	N-CADHERIN SIGNALING EVENTS	1.44763e-05	0.01	30	33	1	TRUE	FALSE		22	0	1		CDC42, 1.44762671174e-05;
TP53	any non-synonymous	LGG	EPHB FORWARD SIGNALING	2.54193e-05	0.01	150	29	2	TRUE	FALSE		17	3	0	NRAS, 1.06851072904e-09; CDC42, 6.24331042144e-06; RAP1A, 2.54193465162e-05;
BRAF	600, 601	THCA	REGULATION OF TELOMERASE	0.00409495	0.01	235	0	0	FALSE	TRUE		15	8	0	IFNAR2, 3.61113134758e-12; HDAC1, 2.35355150247e-05; IRF1, 3.76566873738e-05; CCND1, 8.64451888313e-05; SMG5, 0.000110554715131; SMAD3, 0.00017777355153; BLM, 0.000347064470961; TGFB1, 0.00409495316034;
BRAF	any non-synonymous	THCA	IL8- AND CXCR2-MEDIATED SIGNALING EVENTS	0.00405421	0.01	235	2	1	FALSE	TRUE		17	13	0	GNA14, 2.80583691497e-20; ELMO1, 5.94242183664e-19; RAC2, 8.31670245683e-09; GNB1, 1.62203371891e-08; GNA15, 3.56327741646e-08; VASP, 2.95085704226e-07; GNAI2, 3.00394211669e-05; FGR, 3.13592900955e-05; DOCK2, 5.20659173925e-05; PLCB2, 0.000498453625986; ARRB2, 0.000952900563745; CXCR2, 0.00298546429954; PIK3R6, 0.0040542076956;
BRAF	any non-synonymous	THCA	CALCIUM SIGNALING IN THE CD4+ TCR PATHWAY	0.00409905	0.01	235	2	1	FALSE	TRUE		14	8	0	CSF2, 4.11486574947e-13; BATF3, 2.97629948096e-08; IL2RA, 1.02643912366e-07; PPP3CA, 0.000191236438036; CD40LG, 0.000210715853065; FOSL1, 0.000258658991222; NFATC1, 0.000490051534471; CREM, 0.00409905016166;
TP53	any non-synonymous	BRCA	SIGNALING EVENTS MEDIATED BY TCPTP	7.7434e-37	0.01	176	103	5	TRUE	FALSE		41	0	0
TP53	any non-synonymous	BRCA	EPHB FORWARD SIGNALING	1.15755e-36	0.01	176	103	5	TRUE	FALSE		39	0	0
TP53	any non-synonymous	BRCA	SYNDECAN-2-MEDIATED SIGNALING EVENTS	1.32551e-36	0.01	176	103	5	TRUE	FALSE		30	0	0
TP53	any non-synonymous	LGG	E-CADHERIN SIGNALING IN THE NASCENT ADHERENS JUNCTION	2.54193e-05	0.01	150	29	2	TRUE	FALSE		18	5	0	WASF2, 5.97208224266e-07; ENAH, 7.65298410573e-07; ABI1, 1.19304702284e-06; CDC42, 6.24331042144e-06; RAP1A, 2.54193465162e-05;
CIC	any non-synonymous	LGG	TRK RECEPTOR SIGNALING MEDIATED BY PI3K AND PLC-GAMMA	0.000177064	0.01	30	33	1	TRUE	FALSE		18	0	2		TRPC3, 1.94046078899e-05;NRAS, 0.000177063877618;
TP53	any non-synonymous	BRCA	EFFECTS OF BOTULINUM TOXIN	1.4155e-36	0.01	176	103	5	TRUE	FALSE		8	0	0
PIK3CA	any non-synonymous	BRCA	AURORA A SIGNALING	0.00231349	0.01	345	7	6	TRUE	FALSE		30	0	12		CENPA, 2.32122636347e-07;BIRC5, 5.85382709113e-07;CDC25B, 2.22890527745e-06;AURKA, 5.74603790883e-06;TPX2, 8.96663582161e-06;AURKB, 1.34034288421e-05;CKAP5, 6.33395893588e-05;DLGAP5, 0.000129737160046;RAN, 0.00026520697476;GIT1, 0.000529276276829;TACC3, 0.00196748342914;RASA1, 0.00231348553978;
TP53	any non-synonymous	BRCA	EPHA FORWARD SIGNALING	1.82159e-36	0.01	176	103	5	TRUE	FALSE		30	0	0
TP53	any non-synonymous	LGG	CDC42 SIGNALING EVENTS	0.00168162	0.01	150	29	2	TRUE	FALSE		31	6	3	ENAH, 7.65298410573e-07; MTOR, 8.0937782639e-07; CDC42, 6.24331042144e-06; PAK4, 0.000207578702718; HES5, 0.000694026787152; ARPC1B, 0.00168161607254;	ARHGEF7, 0.000497457714977;RAF1, 0.00109500100271;F2RL2, 0.00128885635543;
PIK3CA	any non-synonymous	BRCA	FOXM1 TRANSCRIPTION FACTOR NETWORK	0.00477673	0.01	345	7	6	TRUE	FALSE		40	0	20		CCNA2, 2.31427311946e-07;CENPA, 2.32122636347e-07;FOXM1, 2.53475161744e-07;BIRC5, 5.85382709113e-07;CCNB2, 7.72217184048e-07;CCNE1, 7.90184005699e-07;CDC25B, 2.22890527745e-06;PLK1, 3.9928711475e-06;AURKB, 1.34034288421e-05;CDK1, 4.35761750836e-05;MAP2K1, 4.94276783593e-05;MMP2, 0.000220635177727;MYC, 0.000361228440715;CCNB1, 0.000903711848539;ESR1, 0.00180354699553;CENPF, 0.00244429143425;TGFA, …
CIC	any non-synonymous	LGG	CASPASE CASCADE IN APOPTOSIS	0.00203756	0.01	30	33	1	TRUE	FALSE		29	0	4		VIM, 0.000136525383626;DFFB, 0.00125829204174;ARHGDIB, 0.00148105589947;BCL2L1, 0.00203756461595;
TP53	any non-synonymous	LGG	INTEGRIN-LINKED KINASE SIGNALING	0.000616779	0.01	150	29	2	TRUE	FALSE		25	1	3	CDC42, 6.24331042144e-06;	PPP1R14C, 7.85916796488e-08;ARHGEF7, 0.000497457714977;RUVBL2, 0.000616778866151;
CIC	any non-synonymous	LGG	HIF-1-ALPHA TRANSCRIPTION FACTOR NETWORK	4.85497e-36	0.01	30	33	1	TRUE	FALSE		28	0	0
TP53	any non-synonymous	BRCA	E-CADHERIN SIGNALING IN THE NASCENT ADHERENS JUNCTION	5.10266e-36	0.01	176	103	5	TRUE	FALSE		38	0	0
BRAF	any non-synonymous	THCA	IL3-MEDIATED SIGNALING EVENTS	0.00633288	0.01	235	2	1	FALSE	TRUE		12	8	0	BCL2L1, 2.09266008144e-11; STAT5A, 7.92693010867e-09; CSF2RB, 5.86798062204e-06; HDAC1, 2.35355150247e-05; ID1, 2.6115018178e-05; SHC1, 7.62113619067e-05; OSM, 0.000668817052072; INPP5D, 0.00633288107655;
CIC	any non-synonymous	LGG	NONGENOTROPIC ANDROGEN SIGNALING	0.00393832	0.01	30	33	1	TRUE	FALSE		13	0	6		CDC42, 1.44762671174e-05;GNAI3, 3.62525802459e-05;GNB1, 6.62549751045e-05;AR, 0.000185770224515;PLCG2, 0.00108953966242;PLCB2, 0.00393832410587;
BRAF	any non-synonymous	THCA	REGULATION OF TELOMERASE	0.00409495	0.01	235	2	1	FALSE	TRUE		15	8	0	IFNAR2, 3.61113134758e-12; HDAC1, 2.35355150247e-05; IRF1, 3.76566873738e-05; CCND1, 8.64451888313e-05; SMG5, 0.000110554715131; SMAD3, 0.00017777355153; BLM, 0.000347064470961; TGFB1, 0.00409495316034;
CIC	any non-synonymous	LGG	IL2 SIGNALING EVENTS MEDIATED BY PI3K	6.39762e-05	0.01	30	33	1	TRUE	FALSE		19	0	1		MTOR, 6.39761628149e-05;
PIK3CA	any non-synonymous	BRCA	E2F TRANSCRIPTION FACTOR NETWORK	0.00301547	0.01	345	7	6	TRUE	FALSE		70	0	23		CDC25A, 4.99122187217e-08;CCNA2, 2.31427311946e-07;ORC1, 4.32795719376e-07;CCNE1, 7.90184005699e-07;TYMS, 2.78016577707e-06;E2F5, 3.46776591459e-06;E2F2, 3.96501864695e-06;CDC6, 5.60977469811e-06;E2F1, 9.35125499132e-06;CDK1, 4.35761750836e-05;MYBL2, 8.1248353628e-05;RRM2, 0.000118215656981;RANBP1, 0.000149084097275;MYC, 0.000361228440715;CDKN2C, 0.000577963407569;CCNE2, 0.000840931795976;RBL1, 0…
TP53	any non-synonymous	BRCA	ARF6 TRAFFICKING EVENTS	1.32943e-35	0.01	176	103	5	TRUE	FALSE		46	0	0
TP53	any non-synonymous	BRCA	EPHA2 FORWARD SIGNALING	1.36366e-35	0.01	176	103	5	TRUE	FALSE		18	0	0
CIC	any non-synonymous	LGG	TGF-BETA RECEPTOR SIGNALING	0.00178382	0.01	30	33	1	TRUE	FALSE		21	0	3		TGFB2, 0.00137816827288;YAP1, 0.00161567896321;TGFB1, 0.00178381669418;
TP53	any non-synonymous	BRCA	FAS (CD95) SIGNALING PATHWAY	1.99142e-35	0.01	176	103	5	TRUE	FALSE		37	0	0
BRAF	600, 601	THCA	INTERNALIZATION OF ERBB1	7.62114e-05	0.01	235	0	0	FALSE	TRUE		8	6	0	HGS, 1.80055626084e-07; PIK3CD, 2.03706604208e-06; LRIG1, 2.05753889616e-06; SRC, 1.86623953988e-05; PIK3R2, 2.44715338401e-05; SHC1, 7.62113619067e-05;
TP53	any non-synonymous	LGG	PRESENILIN ACTION IN NOTCH AND WNT SIGNALING	0.00201931	0.01	150	29	2	TRUE	FALSE		20	5	2	HDAC1, 1.63478379146e-06; DVL1, 4.56998790349e-06; TLE1, 0.000956719799379; DLL1, 0.00148550573859; PSENEN, 0.00201930880877;	NLK, 4.27133090047e-05;KREMEN2, 4.79668696975e-05;
CIC	any non-synonymous	LGG	COREGULATION OF ANDROGEN RECEPTOR ACTIVITY	0.00018577	0.01	30	33	1	TRUE	FALSE		28	0	4		CDK11B, 3.50757692725e-05;TGIF1, 5.53408070626e-05;KDM1A, 0.000113126940783;AR, 0.000185770224515;
BRAF	600, 601	THCA	FC-EPSILON RECEPTOR I SIGNALING IN MAST CELLS	0.00648023	0.01	235	0	0	FALSE	TRUE		26	19	0	SPHK1, 1.15001662054e-15; LYN, 7.99000433169e-14; FYN, 2.13191602137e-12; PXN, 7.41448873369e-11; RELA, 1.38994730583e-09; WIPF1, 2.39910475966e-07; PPAP2A, 6.7604918816e-07; MAP2K7, 1.13372713875e-06; VAV1, 6.19613347824e-05; SHC1, 7.62113619067e-05; ITK, 0.000148192270846; BTK, 0.000208827918835; FCER1G, 0.000461051872318; LAT2, 0.000858778093974; KLRG1, 0.00307638522341; LCP2, 0.00373502786469…
BRAF	any non-synonymous	THCA	INTERNALIZATION OF ERBB1	7.62114e-05	0.01	235	2	1	FALSE	TRUE		8	6	0	HGS, 1.80055626084e-07; PIK3CD, 2.03706604208e-06; LRIG1, 2.05753889616e-06; SRC, 1.86623953988e-05; PIK3R2, 2.44715338401e-05; SHC1, 7.62113619067e-05;
CIC	any non-synonymous	LGG	SIGNALING EVENTS MEDIATED BY FOCAL ADHESION KINASE	0.000360867	0.01	30	33	1	TRUE	FALSE		21	0	2		RAP1A, 0.000138173557494;ITGB5, 0.000360867392828;
BRAF	600, 601	THCA	BMP RECEPTOR SIGNALING	0.000444749	0.01	235	0	0	FALSE	TRUE		11	6	1	CTDSPL, 3.87004384698e-09; SMURF1, 2.20893513041e-06; BMP4, 2.24007771165e-06; BMP7, 3.1534924658e-06; BAMBI, 3.9666641023e-05; SMAD6, 0.000444749213424;	SOSTDC1, 6.1637215568e-08;
BRAF	600, 601	THCA	CANONICAL WNT SIGNALING PATHWAY	0.000696112	0.01	235	0	0	FALSE	TRUE		3	2	0	DVL1, 1.50145707948e-11; NKD2, 0.00069611199376;
TP53	any non-synonymous	BRCA	IL6-MEDIATED SIGNALING EVENTS	7.03046e-35	0.01	176	103	5	TRUE	FALSE		45	0	0
CDH1	any non-synonymous	BRCA	P73 TRANSCRIPTION FACTOR NETWORK	0.00154923	0.01	19	82	3	TRUE	FALSE		76	0	13		FBXO45, 4.05153430841e-07;CCNE2, 3.59128672666e-06;CHEK1, 1.06814709982e-05;CCNA2, 2.02977604634e-05;PLK1, 2.95921924502e-05;RAD51, 3.54992140913e-05;BUB1, 5.51750334262e-05;CDK1, 9.99340589483e-05;BBC3, 0.000139144165562;CCNB1, 0.000355850449873;PPAP2A, 0.000841773148379;IL4R, 0.00105522633449;ABL1, 0.00154922573293;
CTNNB1	25, 45	UCEC	WNT SIGNALING NETWORK	0.00166822	0.01	67	0	0	FALSE	TRUE		24	0	8		KREMEN1, 4.07899620492e-10;WIF1, 1.36162759326e-08;FZD10, 2.05583222976e-08;FZD5, 1.02481341099e-06;DKK1, 8.68424581233e-06;WNT5A, 0.000586111800939;FZD1, 0.00136582040717;FZD8, 0.00166821681247;
CDH1	any non-synonymous	BRCA	REGULATION OF TELOMERASE	0.00154923	0.01	19	82	3	TRUE	FALSE		64	0	11		DKC1, 1.29058506067e-07;HSP90AA1, 4.83603732539e-07;NCL, 8.1167145885e-05;BLM, 9.78573257286e-05;HDAC2, 0.000104533809814;TERF2, 0.000157198691782;SIN3B, 0.000163941647726;PTGES3, 0.000216266308493;XRCC6, 0.00087088554167;TGFB1, 0.000986842604341;ABL1, 0.00154922573293;
CIC	any non-synonymous	LGG	INSULIN-MEDIATED GLUCOSE TRANSPORT	0.00199124	0.01	30	33	1	TRUE	FALSE		15	0	3		AKT2, 1.63546221544e-05;RHOQ, 0.0009173697041;GYS1, 0.00199123545744;
CIC	any non-synonymous	LGG	ALPHA4 BETA1 INTEGRIN SIGNALING EVENTS	0.000130518	0.01	30	33	1	TRUE	FALSE		13	0	1		VCAM1, 0.000130517922952;
BRAF	any non-synonymous	THCA	REGULATION OF ANDROGEN RECEPTOR ACTIVITY	0.000816079	0.01	235	2	1	TRUE	FALSE		9	5	0	GATA2, 1.47921354491e-06; RXRG, 1.5675447754e-06; SRC, 1.86623953988e-05; HDAC1, 2.35355150247e-05; RXRB, 0.000816078505424;
BRAF	600, 601	THCA	PDGFR-ALPHA SIGNALING PATHWAY	7.62114e-05	0.01	235	0	0	FALSE	TRUE		7	4	0	SHF, 6.72906378267e-11; ELK1, 1.73299466099e-10; PDGFRA, 3.75878456426e-07; SHC1, 7.62113619067e-05;
PIK3CA	any non-synonymous	BRCA	VALIDATED TARGETS OF C-MYC TRANSCRIPTIONAL ACTIVATION	0.00136719	0.01	345	7	6	TRUE	FALSE		75	0	11		CDC25A, 4.99122187217e-08;BIRC5, 5.85382709113e-07;HSPD1, 4.02896918534e-06;ODC1, 2.67226242812e-05;TAF4B, 6.90278853155e-05;MTDH, 0.000136935574756;CDCA7, 0.000160856161361;MYC, 0.000361228440715;CCNB1, 0.000903711848539;E2F3, 0.00120533227881;BMI1, 0.00136718691071;
CIC	any non-synonymous	LGG	SIGNALING EVENTS MEDIATED BY HDAC CLASS III	5.54516e-05	0.01	30	33	1	TRUE	FALSE		17	0	1		HOXA10, 5.54515994322e-05;
BRAF	600, 601	THCA	TNF RECEPTOR SIGNALING PATHWAY	0.00152464	0.01	235	0	0	FALSE	TRUE		15	9	0	STAT1, 6.03768775075e-12; RELA, 1.38994730583e-09; BIRC3, 2.81867195744e-09; TNFRSF1A, 3.67546900141e-08; TNFRSF1B, 6.03813778676e-07; MAP2K7, 1.13372713875e-06; MAP3K3, 7.43296966768e-05; MAP4K4, 0.000310912200235; RFFL, 0.00152463536871;
CIC	any non-synonymous	LGG	LISSENCEPHALY GENE (LIS1) IN NEURONAL MIGRATION AND DEVELOPMENT	0.00172937	0.01	30	33	1	TRUE	FALSE		12	0	4		CDC42, 1.44762671174e-05;IQGAP1, 4.0065297393e-05;DCX, 0.000369263528295;CDK5R2, 0.00172936671186;
PIK3CA	any non-synonymous	BRCA	LKB1 SIGNALING EVENTS	0.000361228	0.01	345	7	6	TRUE	FALSE		46	0	4		MAPT, 2.15009184098e-06;YWHAG, 5.59529163694e-05;YWHAZ, 8.76639327765e-05;MYC, 0.000361228440715;
BRAF	any non-synonymous	THCA	CANONICAL WNT SIGNALING PATHWAY	0.000696112	0.01	235	2	1	FALSE	TRUE		3	2	0	DVL1, 1.50145707948e-11; NKD2, 0.00069611199376;
TP53	any non-synonymous	BRCA	S1P2 PATHWAY	2.86376e-34	0.01	176	103	5	TRUE	FALSE		23	0	0
BRAF	600, 601	THCA	E-CADHERIN SIGNALING IN KERATINOCYTES	1.86624e-05	0.01	235	0	0	FALSE	TRUE		6	5	0	FYN, 2.13191602137e-12; AJUBA, 7.51022809095e-09; JUP, 3.28274756484e-08; VASP, 2.95085704226e-07; SRC, 1.86623953988e-05;
TP53	any non-synonymous	UCEC	AURORA A SIGNALING	0.00442272	0.01	57	16	2	TRUE	FALSE		29	0	13		CDC25B, 1.25620547694e-07;AURKA, 1.95637965604e-07;TPX2, 2.17732193397e-07;MDM2, 7.31623353359e-07;CENPA, 2.5383405937e-06;TACC3, 7.31195410866e-06;BIRC5, 2.53939398751e-05;DLGAP5, 0.0002457981223;PRKACA, 0.00055585671709;NDEL1, 0.000583188556136;RAN, 0.00361378348023;GADD45A, 0.00412371839332;PPP2R5D, 0.00442272171402;
TP53	any non-synonymous	BRCA	EPHRIN B REVERSE SIGNALING	3.39014e-34	0.01	176	103	5	TRUE	FALSE		28	0	0
BRAF	600, 601	THCA	REGULATION OF ANDROGEN RECEPTOR ACTIVITY	0.000816079	0.01	235	0	0	TRUE	FALSE		9	5	0	GATA2, 1.47921354491e-06; RXRG, 1.5675447754e-06; SRC, 1.86623953988e-05; HDAC1, 2.35355150247e-05; RXRB, 0.000816078505424;
TP53	any non-synonymous	BRCA	NONGENOTROPIC ANDROGEN SIGNALING	4.04656e-34	0.01	176	103	5	TRUE	FALSE		29	0	0
BRAF	any non-synonymous	THCA	FC-EPSILON RECEPTOR I SIGNALING IN MAST CELLS	0.00648023	0.01	235	2	1	FALSE	TRUE		26	19	0	SPHK1, 1.15001662054e-15; LYN, 7.99000433169e-14; FYN, 2.13191602137e-12; PXN, 7.41448873369e-11; RELA, 1.38994730583e-09; WIPF1, 2.39910475966e-07; PPAP2A, 6.7604918816e-07; MAP2K7, 1.13372713875e-06; VAV1, 6.19613347824e-05; SHC1, 7.62113619067e-05; ITK, 0.000148192270846; BTK, 0.000208827918835; FCER1G, 0.000461051872318; LAT2, 0.000858778093974; KLRG1, 0.00307638522341; LCP2, 0.00373502786469…
TP53	any non-synonymous	UCEC	SIGNALING MEDIATED BY P38-ALPHA AND P38-BETA	0.000551979	0.01	57	16	2	TRUE	FALSE		37	0	5		ESR1, 1.14169106996e-06;CSNK2A1, 7.85323434155e-05;PPARGC1A, 0.000180279884646;CEBPB, 0.000499951232149;PLA2G4A, 0.000551979306839;
TP53	any non-synonymous	LGG	NONGENOTROPIC ANDROGEN SIGNALING	0.00210593	0.01	150	29	2	TRUE	FALSE		13	5	3	GNAI3, 6.68098770699e-09; CDC42, 6.24331042144e-06; AR, 9.21203294222e-06; PLCG2, 0.000109345277368; PLCB2, 0.000886703415201;	GNB1, 1.78620927521e-07;RAF1, 0.00109500100271;CREB1, 0.00210592600756;
BRAF	600, 601	THCA	VALIDATED TRANSCRIPTIONAL TARGETS OF AP1 FAMILY MEMBERS FRA1 AND FRA2	0.00449855	0.01	235	0	0	FALSE	TRUE		18	14	0	IVL, 1.78712147142e-13; ITGB4, 2.01261731732e-11; LIF, 1.10169613147e-10; PLAUR, 1.24340169984e-10; PLAU, 2.98997742422e-09; FOSL2, 4.06033643907e-09; DCN, 2.00874582159e-06; MMP9, 1.62405395542e-05; HMOX1, 4.57645858802e-05; CCND1, 8.64451888313e-05; FOSL1, 0.000258658991222; NFATC1, 0.000490051534471; IL6, 0.000592002322468; COL1A2, 0.00449855070336;
BRAF	600, 601	THCA	IFN-GAMMA PATHWAY	0.000985856	0.01	235	0	0	FALSE	TRUE		17	8	0	STAT1, 6.03768775075e-12; CAMK2G, 3.65410403811e-10; IFNGR1, 6.56180578347e-09; STAT3, 7.44293929193e-09; IRF9, 6.08307641893e-06; IRF1, 3.76566873738e-05; MAP3K11, 0.000152247967685; DAPK1, 0.000985856254994;
CIC	any non-synonymous	LGG	BCR SIGNALING PATHWAY	0.00317008	0.01	30	33	1	TRUE	FALSE		32	0	11		NFATC1, 1.58554066856e-05;BCL10, 0.000100736737855;NFKBIB, 0.000161986104679;DAPP1, 0.000824280230758;SYK, 0.000874376060219;INPP5D, 0.00106370200264;PLCG2, 0.00108953966242;PTPN6, 0.00116038898289;BLNK, 0.00149594075872;MAP4K1, 0.00267448082923;ETS1, 0.00317007510165;
CDH1	any non-synonymous	BRCA	CERAMIDE SIGNALING PATHWAY	0.000724521	0.01	19	82	3	TRUE	FALSE		47	0	7		IGF1, 1.80490969121e-06;MAP2K1, 1.12178982182e-05;CYCS, 1.39086445648e-05;MAP3K1, 2.10628443716e-05;AIFM1, 3.17061464993e-05;SPHK2, 0.00024262342694;EIF2AK2, 0.00072452086315;
BRAF	any non-synonymous	THCA	BMP RECEPTOR SIGNALING	0.000444749	0.01	235	2	1	FALSE	TRUE		11	6	1	CTDSPL, 3.87004384698e-09; SMURF1, 2.20893513041e-06; BMP4, 2.24007771165e-06; BMP7, 3.1534924658e-06; BAMBI, 3.9666641023e-05; SMAD6, 0.000444749213424;	SOSTDC1, 6.1637215568e-08;
BRAF	any non-synonymous	THCA	PDGFR-ALPHA SIGNALING PATHWAY	7.62114e-05	0.01	235	2	1	FALSE	TRUE		7	4	0	SHF, 6.72906378267e-11; ELK1, 1.73299466099e-10; PDGFRA, 3.75878456426e-07; SHC1, 7.62113619067e-05;
BRAF	any non-synonymous	THCA	TNF RECEPTOR SIGNALING PATHWAY	0.00152464	0.01	235	2	1	FALSE	TRUE		15	9	0	STAT1, 6.03768775075e-12; RELA, 1.38994730583e-09; BIRC3, 2.81867195744e-09; TNFRSF1A, 3.67546900141e-08; TNFRSF1B, 6.03813778676e-07; MAP2K7, 1.13372713875e-06; MAP3K3, 7.43296966768e-05; MAP4K4, 0.000310912200235; RFFL, 0.00152463536871;
PIK3CA	any non-synonymous	BRCA	P73 TRANSCRIPTION FACTOR NETWORK	0.00131753	0.01	345	7	6	TRUE	FALSE		76	0	11		CCNA2, 2.31427311946e-07;BUB1, 3.09723741575e-06;RAD51, 3.47470838658e-06;PLK1, 3.9928711475e-06;CDK1, 4.35761750836e-05;CHEK1, 8.27240655566e-05;MYC, 0.000361228440715;HSF1, 0.000412613185804;CCNE2, 0.000840931795976;CCNB1, 0.000903711848539;PFDN5, 0.00131752539842;
BRAF	any non-synonymous	THCA	E-CADHERIN SIGNALING IN KERATINOCYTES	1.86624e-05	0.01	235	2	1	FALSE	TRUE		6	5	0	FYN, 2.13191602137e-12; AJUBA, 7.51022809095e-09; JUP, 3.28274756484e-08; VASP, 2.95085704226e-07; SRC, 1.86623953988e-05;
CIC	any non-synonymous	LGG	NOTCH-MEDIATED HES/HEY NETWORK	0.0010169	0.01	30	33	1	TRUE	FALSE		28	0	6		HDAC1, 1.06921578117e-05;KDM1A, 0.000113126940783;HEY1, 0.000116572169042;AR, 0.000185770224515;RUNX2, 0.000577385733047;TLE1, 0.00101689643594;
TP53	any non-synonymous	LGG	REGULATION OF NUCLEAR SMAD2/3 SIGNALING	0.00265052	0.01	150	29	2	TRUE	FALSE		41	9	4	RBBP4, 2.06029861275e-10; SNIP1, 5.71932579216e-10; ZBTB17, 8.73074697153e-10; HDAC1, 1.63478379146e-06; AR, 9.21203294222e-06; CDKN2B, 0.000155323580649; SMAD3, 0.000685748236354; RUNX2, 0.00169512295662; IL10, 0.00265051849402;	FOXG1, 0.000194320830384;DLX1, 0.00156479571039;SKI, 0.0020233514677;CREB1, 0.00210592600756;
CIC	any non-synonymous	LGG	NECTIN ADHESION PATHWAY	0.00138785	0.01	30	33	1	TRUE	FALSE		14	0	4		CDC42, 1.44762671174e-05;RAP1A, 0.000138173557494;ITGB3, 0.000813633938592;PDGFB, 0.00138784929484;
BRAF	600, 601	THCA	ALPHA6 BETA4 INTEGRIN-LIGAND INTERACTIONS	2.01262e-11	0.01	235	0	0	FALSE	TRUE		5	3	0	LAMB3, 6.99787274237e-13; LAMC2, 8.7460853258e-13; ITGB4, 2.01261731732e-11;
TP53	any non-synonymous	BRCA	UROKINASE-TYPE PLASMINOGEN ACTIVATOR (UPA) AND UPAR-MEDIATED SIGNALING	2.00156e-33	0.01	176	103	5	TRUE	FALSE		36	0	0
TP53	any non-synonymous	LGG	RHOA SIGNALING PATHWAY	0.00128886	0.01	150	29	2	TRUE	FALSE		16	2	1	PKN2, 1.28308307862e-09; CDC42, 6.24331042144e-06;	F2RL2, 0.00128885635543;
BRAF	600, 601	THCA	IL23-MEDIATED SIGNALING EVENTS	0.00191699	0.01	235	0	0	FALSE	TRUE		17	11	0	ITGA3, 8.66495693252e-21; IL23A, 2.10473864844e-14; STAT1, 6.03768775075e-12; RELA, 1.38994730583e-09; STAT3, 7.44293929193e-09; STAT5A, 7.92693010867e-09; STAT4, 3.46083731367e-06; CD3E, 0.00015767099596; IL6, 0.000592002322468; IL18, 0.000812820711335; IL24, 0.00191698814324;
BRAF	600, 601	THCA	ATR SIGNALING PATHWAY	1.43634e-07	0.01	235	0	0	FALSE	TRUE		5	2	0	MCM2, 1.61449322672e-12; CDC25A, 1.43633632234e-07;
BRAF	any non-synonymous	THCA	IFN-GAMMA PATHWAY	0.000985856	0.01	235	2	1	FALSE	TRUE		17	8	0	STAT1, 6.03768775075e-12; CAMK2G, 3.65410403811e-10; IFNGR1, 6.56180578347e-09; STAT3, 7.44293929193e-09; IRF9, 6.08307641893e-06; IRF1, 3.76566873738e-05; MAP3K11, 0.000152247967685; DAPK1, 0.000985856254994;
CIC	any non-synonymous	LGG	THROMBOXANE A2 RECEPTOR SIGNALING	0.00169512	0.01	30	33	1	TRUE	FALSE		31	0	7		GNB1, 6.62549751045e-05;BLK, 0.000120122320122;VCAM1, 0.000130517922952;GNA15, 0.000219096124454;ARRB2, 0.000638748349757;SYK, 0.000874376060219;PIK3CG, 0.00169512295662;
BRAF	600, 601	THCA	ARF6 DOWNSTREAM PATHWAY	1.2434e-10	0.01	235	0	0	FALSE	TRUE		2	2	0	ARF6, 5.08658259358e-13; PLAUR, 1.24340169984e-10;
BRAF	600, 601	THCA	CXCR4-MEDIATED SIGNALING EVENTS	0.00633288	0.01	235	0	0	FALSE	TRUE		58	37	0	ITGA3, 8.66495693252e-21; ITGA2, 1.23958468853e-15; LYN, 7.99000433169e-14; FYN, 2.13191602137e-12; STAT1, 6.03768775075e-12; PXN, 7.41448873369e-11; PTK2B, 4.70330680543e-09; STAT3, 7.44293929193e-09; STAT5A, 7.92693010867e-09; GNAZ, 1.5245217342e-08; GNB1, 1.62203371891e-08; HGS, 1.80055626084e-07; HLA-DRA, 1.11350261701e-06; STAT2, 1.72721547189e-06; PIK3CD, 2.03706604208e-06; ITGB1, 6.2997538…
TP53	any non-synonymous	BRCA	WNT SIGNALING NETWORK	5.70432e-33	0.01	176	103	5	TRUE	FALSE		24	0	0
BRAF	any non-synonymous	THCA	VALIDATED TRANSCRIPTIONAL TARGETS OF AP1 FAMILY MEMBERS FRA1 AND FRA2	0.00449855	0.01	235	2	1	FALSE	TRUE		18	14	0	IVL, 1.78712147142e-13; ITGB4, 2.01261731732e-11; LIF, 1.10169613147e-10; PLAUR, 1.24340169984e-10; PLAU, 2.98997742422e-09; FOSL2, 4.06033643907e-09; DCN, 2.00874582159e-06; MMP9, 1.62405395542e-05; HMOX1, 4.57645858802e-05; CCND1, 8.64451888313e-05; FOSL1, 0.000258658991222; NFATC1, 0.000490051534471; IL6, 0.000592002322468; COL1A2, 0.00449855070336;
CIC	any non-synonymous	LGG	ATF-2 TRANSCRIPTION FACTOR NETWORK	6.28586e-33	0.01	30	33	1	TRUE	FALSE		20	0	0
BRAF	600, 601	THCA	TRK RECEPTOR SIGNALING MEDIATED BY PI3K AND PLC-GAMMA	0.00300644	0.01	235	0	0	FALSE	TRUE		11	8	0	SFN, 1.15279715975e-14; STAT5A, 7.92693010867e-09; EPB41L1, 2.95849515048e-08; SRC, 1.86623953988e-05; YWHAH, 2.59847689815e-05; SHC1, 7.62113619067e-05; CCND1, 8.64451888313e-05; NTRK1, 0.00300643586448;
TP53	any non-synonymous	LGG	SYNDECAN-2-MEDIATED SIGNALING EVENTS	9.64969e-05	0.01	150	29	2	TRUE	FALSE		18	2	0	EPB41, 7.27618152585e-13; TGFB1, 9.64968685891e-05;
BRAF	600, 601	THCA	SIGNALING EVENTS MEDIATED BY HDAC CLASS II	0.00281442	0.01	235	0	0	FALSE	TRUE		8	5	0	UBE2I, 5.9955715153e-12; GNB1, 1.62203371891e-08; GATA2, 1.47921354491e-06; RANGAP1, 0.000219534755187; HDAC9, 0.00281441740425;
BRAF	600, 601	THCA	INTEGRIN-LINKED KINASE SIGNALING	0.00536424	0.01	235	0	0	FALSE	TRUE		18	10	0	ACTN1, 2.04099211993e-11; PXN, 7.41448873369e-11; PARVA, 6.73350392597e-07; PPP1R14C, 5.89739399731e-06; LIMS2, 8.06009598269e-05; CCND1, 8.64451888313e-05; PARVG, 0.000111554198496; RHOG, 0.000602152393104; PPP1R14A, 0.00412784417426; ZEB1, 0.00536424306746;
BRAF	600, 601	THCA	GMCSF-MEDIATED SIGNALING EVENTS	0.00633288	0.01	235	0	0	FALSE	TRUE		13	9	0	LYN, 7.99000433169e-14; CSF2, 4.11486574947e-13; STAT1, 6.03768775075e-12; STAT3, 7.44293929193e-09; STAT5A, 7.92693010867e-09; CSF2RB, 5.86798062204e-06; SHC1, 7.62113619067e-05; OSM, 0.000668817052072; INPP5D, 0.00633288107655;
PIK3CA	any non-synonymous	BRCA	REGULATION OF RETINOBLASTOMA PROTEIN	0.00027686	0.01	345	7	6	TRUE	FALSE		59	0	5		CCNA2, 2.31427311946e-07;CCNE1, 7.90184005699e-07;E2F2, 3.96501864695e-06;E2F1, 9.35125499132e-06;GSC, 0.00027685961093;
TP53	any non-synonymous	BRCA	ANGIOPOIETIN RECEPTOR TIE2-MEDIATED SIGNALING	1.07883e-32	0.01	176	103	5	TRUE	FALSE		46	0	0
TP53	any non-synonymous	LGG	SIGNALING EVENTS MEDIATED BY HDAC CLASS II	0.000391314	0.01	150	29	2	TRUE	FALSE		16	1	2	BCL6, 7.41811858438e-05;	GNB1, 1.78620927521e-07;UBE2I, 0.000391314098303;
CIC	any non-synonymous	LGG	SUMOYLATION BY RANBP2 REGULATES TRANSCRIPTIONAL REPRESSION	1.06922e-05	0.01	30	33	1	TRUE	FALSE		4	0	1		HDAC1, 1.06921578117e-05;
CIC	any non-synonymous	LGG	SIGNALING EVENTS MEDIATED BY PRL	0.000936838	0.01	30	33	1	TRUE	FALSE		10	0	3		RHOC, 3.47615036656e-05;PTP4A2, 0.000100434980503;CDK2, 0.000936838171331;
BRAF	600, 601	THCA	CALCINEURIN-REGULATED NFAT-DEPENDENT TRANSCRIPTION IN LYMPHOCYTES	0.00409905	0.01	235	0	0	FALSE	TRUE		23	12	0	CSF2, 4.11486574947e-13; GATA3, 2.18988915839e-10; PRKCQ, 1.17666097359e-08; BATF3, 2.97629948096e-08; IL2RA, 1.02643912366e-07; FOXP3, 1.44498024611e-07; CTLA4, 5.33084924211e-06; DGKA, 5.40600600126e-06; IKZF1, 0.000142239258391; FOSL1, 0.000258658991222; NFATC1, 0.000490051534471; CREM, 0.00409905016166;
BRAF	any non-synonymous	THCA	SIGNALING EVENTS MEDIATED BY HDAC CLASS II	0.00281442	0.01	235	2	1	FALSE	TRUE		8	5	0	UBE2I, 5.9955715153e-12; GNB1, 1.62203371891e-08; GATA2, 1.47921354491e-06; RANGAP1, 0.000219534755187; HDAC9, 0.00281441740425;
BRAF	any non-synonymous	THCA	IL23-MEDIATED SIGNALING EVENTS	0.00191699	0.01	235	2	1	FALSE	TRUE		17	11	0	ITGA3, 8.66495693252e-21; IL23A, 2.10473864844e-14; STAT1, 6.03768775075e-12; RELA, 1.38994730583e-09; STAT3, 7.44293929193e-09; STAT5A, 7.92693010867e-09; STAT4, 3.46083731367e-06; CD3E, 0.00015767099596; IL6, 0.000592002322468; IL18, 0.000812820711335; IL24, 0.00191698814324;
BRAF	any non-synonymous	THCA	CXCR4-MEDIATED SIGNALING EVENTS	0.00633288	0.01	235	2	1	FALSE	TRUE		58	37	0	ITGA3, 8.66495693252e-21; ITGA2, 1.23958468853e-15; LYN, 7.99000433169e-14; FYN, 2.13191602137e-12; STAT1, 6.03768775075e-12; PXN, 7.41448873369e-11; PTK2B, 4.70330680543e-09; STAT3, 7.44293929193e-09; STAT5A, 7.92693010867e-09; GNAZ, 1.5245217342e-08; GNB1, 1.62203371891e-08; HGS, 1.80055626084e-07; HLA-DRA, 1.11350261701e-06; STAT2, 1.72721547189e-06; PIK3CD, 2.03706604208e-06; ITGB1, 6.2997538…
TP53	any non-synonymous	LGG	P75(NTR)-MEDIATED SIGNALING	0.000167924	0.01	150	29	2	TRUE	FALSE		26	2	1	ZNF274, 6.43563766861e-10; RHOC, 3.34319008013e-05;	IRAK1, 0.000167923842465;
BRAF	any non-synonymous	THCA	ALPHA6 BETA4 INTEGRIN-LIGAND INTERACTIONS	2.01262e-11	0.01	235	2	1	FALSE	TRUE		5	3	0	LAMB3, 6.99787274237e-13; LAMC2, 8.7460853258e-13; ITGB4, 2.01261731732e-11;
BRAF	any non-synonymous	THCA	CALCINEURIN-REGULATED NFAT-DEPENDENT TRANSCRIPTION IN LYMPHOCYTES	0.00409905	0.01	235	2	1	FALSE	TRUE		23	12	0	CSF2, 4.11486574947e-13; GATA3, 2.18988915839e-10; PRKCQ, 1.17666097359e-08; BATF3, 2.97629948096e-08; IL2RA, 1.02643912366e-07; FOXP3, 1.44498024611e-07; CTLA4, 5.33084924211e-06; DGKA, 5.40600600126e-06; IKZF1, 0.000142239258391; FOSL1, 0.000258658991222; NFATC1, 0.000490051534471; CREM, 0.00409905016166;
PIK3CA	any non-synonymous	BRCA	P75(NTR)-MEDIATED SIGNALING	0.000700301	0.01	345	7	6	TRUE	FALSE		64	0	9		RHOB, 7.96530831197e-07;CYCS, 2.06372078104e-06;RIPK2, 5.48770731927e-06;E2F1, 9.35125499132e-06;PSEN1, 1.14674267284e-05;IRAK1, 0.00033512733295;PIK3R1, 0.000406063908765;NDN, 0.000418430395861;CASP9, 0.000700301220836;
[truncated: 19,473 more rows]

[truncated: 9 more sheets: T7B_oncodriveclust_pathway_gexp, T7C_pfam_pathway_gexp, T7D_muts_no_clusts_path_gexp, T8_AssociationStatistics, T9_pathway_definitions, T10_tcga_mutation_data, T11_IC50_cell_line_mutations, T12_cell_line_clust_enrichment, T13_IC50_Pvalues]
